# Supplementary material for: Integrative Genomic Characterization Identifies Molecular Subtypes of Lung Carcinoids
Source: Oxford University Press journal article supplement (doi:10.1158/0008-5472.can-19-0214), 2019-07-12
Supplement: 00085472can190214-sup-215659_2_supp_5607909_pts540.xlsx [file 00085472can190214-sup-215659_2_supp_5607909_pts540.xlsx]

## Sheet: Clinical information
Supplementary FIle 1: Clinical Characteristics of Lung Carcinoids
SVL	IMPACT ID	RNA-seq ID	Ac #	Age	Gender	Diagnosis	Subtype	Location	tu size (cm)	Vascular invasion	perineural invasion	Non-neoplastic lung	Lymph node (Met/total)	Note	Location
Lu-Aty12	s_LT_luca_020_P	133	S08-31002	74	F	atypical carcinoid tumor	LC1	left lower lobe	2.2	Y	N	multiple tumorlets and diffuse neuroendocrine cell hyperplasia	0/3		Peripheral
Lu-Aty13	s_LT_luca_030_P	167	S11-61863	56	F	atypical carcinoid tumor (classification is based on the presence of necrosis) - tumor is peribronchial / endobronchial	LC1	left lower lobe	4.5	N	Y	post-obstructive changes	0/3	History of breast ca with LLL lung tumor	Central
Lu-Aty3	s_LT_luca_003_P	105	S09-14210	71	F	atypical carcinoid, undifferentiated	LC1	right middle lobe	2	N	N	unremarkable	0/2	CT FNA lung positive adenoca history of carcinoid status post resection "83"	Peripheral
Lu-Aty4	s_LT_luca_004_P	108	S10-13937	52	F	atypical carcinoid ; multiple typical carcinoid tumor and tumorlets raging from 1.1 to 0.2cm in greatest dimension	LC1	right middle lobe	3.5	Y	Y	emphysematous changes and respiratory bronchiolitis	1/17		Peripheral
Lu-Aty6	s_LT_luca_008_P	113	S11-8406	81	F	atypical carcinoid	LC1	left lower lobe	3	Y	Y		3/3	negative: calcitonin, TTF-1 and monoclonal CEA; proliferative index about 5-7% Ki-67 staining	Peripheral
Lu-Aty7	s_LT_luca_012_P	117	S11-62580	76	F	atypical carcinoid	LC1	left upper lobe	2.1	N	N	parenchyma with focal congestion	0/12	Ki-79 proliferation index is moderate (40%)	Central
Lu-Aty8	s_LT_luca_014_P	120	S12-5025	80	F	atypical carcinoid	LC1	left lower lobe	3.5	Y	N	emphysematous changes and respiratory bronchiolitis	2/9	Tumor positive for: AE1/AE3, chromogranin, synaptophysin, CD56, TTF-1 and the MIB-1 stains 15% tu cells	Peripheral
Lu-ty10	s_LT_luca_021_P	135	S11-1690	66	F	typical carcinoid	LC1	right upper lobe	0.9	Y	N		0/4	Carcinoid tumorlet (1mm) and neuroendocrine cell hyperplasia (conf by chromogranin stain) suggestive of diffuse idiopathic pulmonary neuroendocrine cell hyperplasia (dipnech), multiple minute meningothelioid nodules, …	Peripheral
Lu-ty14	s_LT_luca_025_P	140	S11-43223	81	F	typical carcinoid	LC1	left lower lobe	3.5	N	N	unremarkable	0/2		Peripheral
Lu-ty15	s_LT_luca_026_P	141	S11-51576	73	F	typical carcinoid	LC1	left lower lobe	1.2	N	N	unremarkable			Peripheral
Lu-ty3	s_LT_luca_005_P	111	S11-2790	67	M	typical carcinoid	LC1	lingula	1.4	N	N	unremarkable		Tumor weakly positive for TFF-1 and low Mib-1 proliferative index (1%)	Peripheral
Lu-ty5	s_LT_luca_010_P	115	S11-52545	66	F	typical carcinoid	LC1	right lower lobe	3.7	N	N		0/6		Peripheral
Lu-ty7	s_LT_luca_013_P	118	S12-718	34	F	typical carcinoid	LC1	right middle lobe	1.6	N	N		2/11		Peripheral
Lu-ty8	s_LT_luca_015_P	121	S12-5976	53	M	typical carcinoid	LC1			N	N				Peripheral
Lu-Aty1	s_LT_luca_006_P	94	S04-32452	56	F	atypical carcinoid tumor, spindle cell type	LC1	right lower lobe	3	Y	N	mild emphysematous changes and focal microscopic granulomatous inflamation	0/3		Peripheral
Lu-Aty10	s_LT_luca_018_P	129	S04-6884	51	M	atypical carcinoid tumor	LC2	left upper lobe	3	Y	N	focal atelectasis	0/6		Central
Lu-Aty11	s_LT_luca_019_P	131	S06-12798	60	M	atypical carcinoid tumor	LC2	right lower lobe	1.2	N	N	emphysema, mild chronic inflammation and focal organizing pneumonia	0/13		Peripheral
Lu-Aty2	s_LT_luca_029_P	99	S06-15274	61	M	atypical carcinoid tumor	LC2	right lower lobe	2	N	N	respiratory bronchiolitis and emphysematous changes	0/4		Peripheral
Lu-Aty5	s_LT_luca_007_P	112	S11-7892	61	M	atypical carcinoid tumor (well differentiated neuroendocrine neoplasm of intermediate grade)	LC2	right lower lobe	3	Y	Y			no necrosis but up to 3 mitosis per 10 high power are identified. Ki67/Mib1 proliferate rate is heterogeneous (some areas 20%). TTF-a and CDX-2 negative	Peripheral
Lu-Aty9	s_LT_luca_017_P	126	S02-22419	64	F	atypical carcinoid tumor	LC2	left lower lobe	6.5	N	Y	unremarkable	0/3		Peripheral
Lu-ty1	s_LT_luca_001_P	62	S11-9055	67	M	typical carcinoid	LC2	left upper lobe	1.7	Y	Y	organizing pneumonia			Peripheral
Lu-ty17	s_LT_luca_028_P	143	S12-14220	69	M	typical carcinoid	LC2	left lower lobe	3.2	N	N	parenchyma with localized hemorrhage	0/14	Tumor positive for: chromogranin, synaptophysin, CD56, focally positive for AE1/AE3, and negative for TTF-1. Ki-67 proliferation <5%	Peripheral
Lu-ty9	s_LT_luca_016_P	122	S12-7033	67	F	typical carcinoid	LC2	right upper lobe	2.6	N	N	unremarkable	0/7	Tu cells positive for synaptophysin, negative for AE1/AE3. Mib1 (Ki-67) proliferation index is low (1%)	Peripheral
Lu-ty11	s_LT_luca_022_P	136	S11-3437	62	F	typical carcinoid	LC3	left upper lobe	3.1	N	N	unremarkable	0/4	Tumor positive for: chromogranin, synaptophysin, CD56, focally positive for AE1/AE3, and negative for TTF-1. Low MIB-1 proliferation <5%	Central
Lu-ty12	s_LT_luca_023_P	137	S11-23461	27	F	typical carcinoid	LC3	right middle and lower lobe	3.2	N	N	Right lower and middle lobe shows atelectatic changes and focal areas of squamous metaplasia in bronchi	0/14		Central
Lu-ty13	s_LT_luca_024_P	139	S11-41974	35	F	typical carcinoid	LC3	left lower lobe	1.1	N	N	peritumotal acute bronchopneumonia with organizing pneumonia			Central
Lu-ty16	s_LT_luca_027_P	142	S11-53908	28	F	typical carcinoid	LC3	left lower lobe	2.4	Y	N	emphysematous changes and chronic inflammation	0/1		Central
Lu-ty2	s_LT_luca_002_P	104	S09-9278	44	M	typical carcinoid	LC3	right lower lobe	8.4	Y	N	emphysematous changes and non-necrotizing granulomas	0/17	typical carcinoid LLL	Central
Lu-ty4	s_LT_luca_009_P	114	S11-25400	28	F	typical carcinoid	LC3	left upper lobe	1.6	N	N	extensive post-obstructive changes	0/8	Mib-1 proliferative index 3%	Peripheral
Lu-ty6	s_LT_luca_011_P	116	S12-14171	33	F	typical carcinoid	LC3	left lower lobe	3	N	N	parenchyma with chronic bronchiolitis	0/4		Central

## Sheet: Tumor Purity
Supplementray File 1 : Tumor purity estimating from pathology , RNA expresion and MEN1 VAF / LOH status
Diagnosis	Subtype	Sample ID	StromalScore	ImmuneScore	ESTIMATEScore	ESTIMATE Purity	% tumor cells(Pathology)	Mutation	% Purity using MEN1 VAF and LOH
AC	LC1	Lu-Aty1	-1421.36	-1436	-2857.36	98.2833	90
AC	LC1	Lu-Aty12	-2066.53	-1673.39	-3739.93	99.8432	95	ARID1A	95
AC	LC1	Lu-Aty13	-404.782	-497.499	-902.281	89.0414	90
AC	LC1	Lu-Aty3	-798.673	-354.361	-1153.03	90.656	80
AC	LC1	Lu-Aty4	-1642.23	-1616.56	-3258.79	99.1992	90
AC	LC1	Lu-Aty6	-831.094	201.7	-629.394	87.1473	80
AC	LC1	Lu-Aty7	-1006.82	365.166	-641.653	87.2354	90
AC	LC1	Lu-Aty8	-1971.41	-1276.72	-3248.12	99.1794	95
TC	LC1	Lu-ty10	-1584.63	-1649.64	-3234.27	99.1532	90
TC	LC1	Lu-ty14	-860.144	-756.373	-1616.52	93.3156	80
TC	LC1	Lu-ty15	-1204.74	-1401.49	-2606.22	97.5366	85
TC	LC1	Lu-ty3	-1788.32	-1605.81	-3394.13	99.4306	95
TC	LC1	Lu-ty5	-1325.25	-1419.57	-2744.83	97.9652	85
TC	LC1	Lu-ty7	-1400.59	-1108.65	-2509.23	97.2126	90
TC	LC1	Lu-ty8	1020.6	698.774	1719.37	65.4428	80
AC	LC2	Lu-Aty10	-2002.98	-1454.89	-3457.87	99.5259	95	MEN1	94
AC	LC2	Lu-Aty11	-1106.14	-437.811	-1543.95	92.9274	90	MEN1	89
AC	LC2	Lu-Aty2	-1177.2	-249.479	-1426.67	92.2778	90
TC	LC2	Lu-Aty5	-1606.07	-891.812	-2497.88	97.1734	85	MEN1	91
TC	LC2	Lu-Aty9	-825.214	-308.853	-1134.07	90.5381	80
AC	LC2	Lu-ty1	652.469	2613.52	3265.99	46.7446	90
AC	LC2	Lu-ty17	-1304.59	-859.243	-2163.84	95.8995	95
TC	LC2	Lu-ty9	-801.811	-535.793	-1337.6	91.7661	60
TC	LC3	Lu-ty11	-1824.81	-1412.2	-3237	99.1584	90
TC	LC3	Lu-ty12	-1910.44	-1453.16	-3363.6	99.3818	95
TC	LC3	Lu-ty13	-1194.91	-807.656	-2002.57	95.2018	90
TC	LC3	Lu-ty16	-1172.11	-1028.31	-2200.42	96.0503	85
TC	LC3	Lu-ty2	-2052	-1445.24	-3497.24	99.5805	95
TC	LC3	Lu-ty4	-937.034	-798.182	-1735.22	93.9278	85
TC	LC3	Lu-ty6	-1460.51	-1389.67	-2850.18	98.2638	95

## Sheet: Omics data summary
Supplementray File 1 : Omics dataset under this study
Sr #	RNAseq ID	Case_ID	MSK-IMPACT	RNAseq	Methylation	Diagnosis	Location	Subtype	MEN1 mutation
1	sample94	Lu-Aty1						LC1
2	sample133	Lu-Aty12						LC1
3	sample167	Lu-Aty13						LC1
4	sample105	Lu-Aty3						LC1
5	sample108	Lu-Aty4						LC1
6	sample113	Lu-Aty6						LC1
7	sample117	Lu-Aty7						LC1
8	sample120	Lu-Aty8						LC1
9	sample135	Lu-ty10						LC1
10	sample140	Lu-ty14						LC1
11	sample141	Lu-ty15						LC1
12	sample111	Lu-ty3						LC1
13	sample115	Lu-ty5						LC1
14	sample118	Lu-ty7						LC1
15	sample121	Lu-ty8						LC1
18	sample129	Lu-Aty10						LC2	MEN1
20	sample131	Lu-Aty11						LC2	MEN1
21	sample99	Lu-Aty2						LC2	MEN1
22	sample112	Lu-Aty5						LC2
16	sample126	Lu-Aty9						LC2	MEN1
23	sample62	Lu-ty1						LC2
19	sample143	Lu-ty17						LC2
17	sample122	Lu-ty9						LC2
24	sample136	Lu-ty11						LC3
25	sample137	Lu-ty12						LC3
26	sample139	Lu-ty13						LC3
27	sample142	Lu-ty16						LC3
28	sample104	Lu-ty2						LC3
29	sample114	Lu-ty4						LC3
30	sample116	Lu-ty6						LC3
MSK-IMPACT	Grey = YES
RNAseq	Grey = YES
Methylation	Grey = YES
Diagnosis	Grey = ACs and White = TCs
Location	Grey = Peripheral and White = Central
Subtype	from RNAseq and methylation

## Sheet: Male and Female 
Supplementary information for Gender for all dataset
Fernandez-Cuesta dataset		Female	Male	total	Bionomial Pval			TMA data	Our disovery data	Fernandez-Cuesta data
	LC1	18	9	27	NS		LC1	Fold = 3.91 and Pval = 1.40E-05	Fold = 6.5 and Pval = 0.007	Fold = 2 and NS
	LC2	3	7	10	NS		LC2	Fold = 0.67 and Pval = NS	Fold = 0.34 and Pval = NS	Fold = 0.42 and Pval = NS
	LC3	14	10	24	NS		LC3	Fold = 1.54 and Pval = NS	Fold = 6 and Pval = NS	Fold = 1.4 and Pval = NS
TMA dataset		Female	Male	total	Bionomial Pval
	LC1	43	11	54	1.401e-05			NS = not significant (Pval > 0.05)
	LC2	6	9	15	NS			Fold = female to male ratio
	LC3	43	28	71	NS
Our disovery dataset		Female	Male	total	Bionomial Pval
	LC1	13	2	15	0.007
	LC2	2	6	8	NS
	LC3	6	1	7	NS
