# Supplementary material for: Integrative Genomic Characterization Identifies Molecular Subtypes of Lung Carcinoids
Source: Oxford University Press journal article supplement (doi:10.1158/0008-5472.can-19-0214), 2019-07-12
Supplement: 00085472can190214-sup-215659_2_supp_5607912_pt9540.xlsx [file 00085472can190214-sup-215659_2_supp_5607912_pt9540.xlsx]

## Sheet: Integrate
Supplementary File 4: Differentially Methylated Probes at CpG sites and CpG ISLAND
Integration of gene expression and respective CpG ISLAND level
island	gene	cor	p.value	fdr
chr12:121416485-121416817	HNF1A	-0.939545	7.41431e-09	9.55404e-07
chr15:82335472-82339937	MEX3B	-0.938125	8.88748e-09	9.55404e-07
chr13:113772727-113773012	F10	-0.925101	3.92972e-08	2.11223e-06
chr11:115373574-115375881	CADM1	-0.920484	6.24789e-08	2.68659e-06
chr22:38200672-38201691	H1F0	-0.915647	9.86632e-08	3.11414e-06
chr2:45235511-45237792	SIX2	-0.915349	1.01391e-07	3.11414e-06
chr2:219848919-219850541	FEV	-0.903533	2.7757e-07	6.63083e-06
chr19:46379883-46380207	FOXA3	-0.899881	3.69271e-07	7.93932e-06
chr1:6530536-6531814	PLEKHG5	-0.898428	4.12427e-07	8.06107e-06
chr11:94501366-94502696	AMOTL1	-0.884496	1.10219e-06	1.86026e-05
chr1:203598471-203598853	ATP2B4	-0.883306	1.19172e-06	1.86026e-05
chr7:2565872-2566114	LFNG	-0.883055	1.21133e-06	1.86026e-05
chr3:45635090-45635932	LIMD1	-0.859712	4.81184e-06	6.89697e-05
chr4:5894071-5895116	CRMP1	-0.842414	1.15187e-05	0.000132452
chr11:57194340-57194650	SLC43A3	-0.840216	1.27746e-05	0.000137327
chr20:57607045-57607782	ATP5E	-0.835738	1.56999e-05	0.000159298
chr17:30813177-30815239	CDK5R1	-0.834909	1.63003e-05	0.000159298
chr10:73846806-73848233	SPOCK2	-0.832599	1.80769e-05	0.000166393
chr16:85684107-85684491	KIAA0182	-0.831987	1.85741e-05	0.000166393
chr16:88554354-88554847	ZFPM1	-0.828433	2.17007e-05	0.000180007
chr14:65170876-65172007	PLEKHG3	-0.827019	2.30645e-05	0.000183661
chr16:85676291-85676592	KIAA0182	-0.823234	2.70789e-05	0.000207928
chr18:55103154-55108853	ONECUT2	-0.806997	5.17897e-05	0.000371159
chr11:63438301-63439314	ATL3	-0.802576	6.11554e-05	0.000410888
chr17:73127196-73127995	NT5C	-0.800204	6.67493e-05	0.000420489
chr5:141030918-141031177	FCHSD1	-0.799516	6.84517e-05	0.000420489
chr22:39638219-39640966	PDGFB	-0.791402	9.14676e-05	0.000546265
chr11:17565766-17566052	USH1C	-0.786915	0.0001068	0.000588573
chr2:238768073-238768831	RAMP1	-0.786729	0.000107482	0.000588573
chr14:36983440-36983738	SFTA3	-0.786227	0.000109333	0.000588573
chr1:26097904-26098107	MAN1C1	-0.786182	0.000109502	0.000588573
chr20:33762403-33762774	PROCR	-0.783135	0.000121358	0.000636392
chr14:101292043-101292709	MEG3	-0.779157	0.000138463	0.000692315
chr4:5889203-5890645	CRMP1	-0.774458	0.000161249	0.000744185
chr7:2563610-2564056	LFNG	-0.774182	0.000162682	0.000744185
chr17:79008929-79009762	BAIAP2	-0.758114	0.000266789	0.00114719
chr11:13030330-13032584	RASSF10	-0.75434	0.000298062	0.00123237
chr16:85670134-85670349	KIAA0182	-0.751734	0.000321402	0.00129974
chr20:3776198-3776419	CDC25B	-0.751192	0.000326446	0.00129974
chr6:41528266-41528900	FOXP4	-0.748571	0.000351788	0.00137517
chr8:8748652-8751478	MFHAS1	-0.742699	0.000414617	0.00159183
chr13:112726281-112728419	SOX1	-0.737405	0.000479086	0.00179678
chr9:123638820-123639936	PHF19	-0.736972	0.000484712	0.00179678
chr17:17109893-17110296	PLD6	-0.733664	0.000529547	0.00191613
chr12:47473177-47474120	AMIGO2	-0.732599	0.000544705	0.00191613
chr11:1007921-1008343	AP2A2	-0.732056	0.000552559	0.00191613
chr18:72916107-72917233	ZADH2	-0.728093	0.000612896	0.00209163
chr22:19746924-19747141	TBX1	-0.725135	0.000661436	0.00222201
chr1:225997646-225998233	EPHX1	-0.720576	0.000742515	0.00245601
chr21:43186280-43187436	RIPK4	-0.710034	0.000962214	0.0030877
chr1:10725187-10725617	CASZ1	-0.707786	0.00101547	0.00321069
chr17:72931729-72932601	OTOP3	-0.704231	0.00110467	0.00344207
chr10:21805197-21805459	C10orf140	-0.703224	0.00113107	0.00347399
chr8:21914275-21914525	EPB49	-0.697981	0.00127725	0.00386774
chr11:129938936-129940798	APLP2	-0.696549	0.00131982	0.00390414
chr2:102803672-102804556	IL1RL2	-0.694913	0.00136984	0.00397993
chr17:79366806-79374742	BAHCC1	-0.685844	0.00167667	0.00480645
chr3:183993905-183994347	ECE2	-0.681515	0.00184201	0.00521095
chr2:10182635-10184702	KLF11	-0.677336	0.0020142	0.00562407
chr6:30180933-30182187	TRIM26	-0.673286	0.00219355	0.00604633
chr6:30687941-30688213	TUBB	-0.66925	0.00238518	0.00641018
chr1:204654132-204654885	LRRN2	-0.650131	0.00349011	0.00893301
chr1:8085554-8086854	ERRFI1	-0.646676	0.00372857	0.00943108
chr13:113622737-113623660	MCF2L	-0.645397	0.00382018	0.00955045
chr16:75284680-75285821	BCAR1	-0.633021	0.00480538	0.0118754
chr20:50417312-50419045	SALL4	-0.626784	0.00537506	0.0131322
chr2:240153476-240153792	HDAC4	-0.602223	0.00817681	0.0189034
chr2:97173851-97174485	NEURL3	-0.584602	0.0108332	0.02343
chr10:103588913-103589254	KCNIP2	-0.584219	0.0108977	0.02343
chr6:30852102-30852676	DDR1	-0.569356	0.0136524	0.0282238
chr17:981508-981748	ABR	-0.559728	0.0157141	0.0318729
chr6:33172289-33172823	HSD17B8	-0.556318	0.0165009	0.0331561
chr6:31619856-31620525	APOM	-0.548028	0.0185436	0.0365769
chr10:104170168-104170872	PSD	-0.540689	0.0205139	0.0393794
chr6:44187186-44187400	SLC29A1	-0.528717	0.0240773	0.045409

## Sheet: CpG ISLAND
Supplementary File 4: Differentially Methylated Probes at CpG sites and CpG ISLAND
Differentially Methylated CpG ISLAND for LC subtypes
CpG ISLAND
island	gene	LC11.avg.beta	LC22.avg.beta	LC3.avg.beta	island.pvalue	island.fdr
chr10:103588913-103589254	KCNIP2	0.444442	0.861184	0.417362	4.8044e-10	1.60604e-08
chr10:103879633-103880628	LDB1	0.0753481	0.510584	0.113518	3.24338e-06	7.90573e-06
chr10:104170168-104170872	PSD	0.152997	0.730122	0.288965	6.72605e-06	1.38061e-05
chr10:125617057-125617329	CPXM2	0.796918	0.204716	0.564074	4.47441e-07	1.78415e-06
chr10:125650820-125651373	CPXM2	0.699601	0.254319	0.437466	1.93702e-05	3.40798e-05
chr10:125804001-125804379	CHST15	0.730762	0.32124	0.637911	1.70405e-06	4.747e-06
chr10:132893428-132893688	TCERG1L	0.883019	0.376151	0.71227	1.93632e-05	3.40798e-05
chr10:133948325-133948677	JAKMIP3	0.806534	0.560593	0.682133	0.000179057	0.000221689
chr10:21805197-21805459	C10orf140	0.343909	0.672267	0.211833	3.35613e-05	5.45371e-05
chr10:48413741-48413968	GDF2	0.800758	0.416926	0.651535	1.85451e-05	3.31263e-05
chr10:73846806-73848233	SPOCK2	0.503625	0.727263	0.242369	4.94091e-05	7.36415e-05
chr1:10725187-10725617	CASZ1	0.744884	0.898037	0.395326	2.27596e-06	6.05198e-06
chr11:1007921-1008343	AP2A2	0.261935	0.796635	0.365663	7.08362e-08	4.14392e-07
chr11:115373574-115375881	CADM1	0.135611	0.710526	0.161762	4.25138e-07	1.77647e-06
chr11:118781060-118781732	BCL9L	0.677475	0.258822	0.213895	2.10592e-06	5.6642e-06
chr11:118900986-118901749	SLC37A4	0.625941	0.268539	0.433059	7.70482e-07	2.65136e-06
chr11:122932173-122933803	HSPA8	0.0759312	0.113802	0.0770588	0.000196043	0.00023769
chr11:123066517-123066986	ASAM	0.502554	0.887686	0.151546	0.000974146	0.0010268
chr11:124615389-124617006	NRGN	0.0847962	0.802512	0.0940589	8.43028e-17	1.97268e-14
chr11:126138359-126139166	FOXRED1;SRPR	0.0263915	0.0393002	0.029014	1.00774e-06	3.23031e-06
chr11:129306659-129306882	BARX2	0.86906	0.369967	0.829161	1.35828e-06	4.07483e-06
chr11:129938936-129940798	APLP2	0.0290802	0.046937	0.0306601	6.45067e-05	9.20401e-05
chr11:13030330-13032584	RASSF10	0.415445	0.0637967	0.0818082	2.63889e-06	6.71196e-06
chr11:130342956-130343652	ADAMTS15	0.726569	0.372439	0.7303	4.5209e-06	1.03715e-05
chr11:1315467-1317115	TOLLIP	0.800678	0.283356	0.623894	6.35754e-07	2.25404e-06
chr11:1330390-1331498	TOLLIP	0.832859	0.213732	0.718518	5.00436e-09	6.16327e-08
chr11:133938850-133939681	JAM3	0.447507	0.316157	0.30043	0.00020167	0.000242004
chr1:115880167-115881332	NGF	0.701407	0.231784	0.593743	7.53903e-09	7.35055e-08
chr11:17565766-17566052	USH1C	0.717354	0.251086	0.318234	6.48816e-09	7.22966e-08
chr1:119531991-119532196	TBX15	0.602243	0.105979	0.19035	0.000722537	0.000775568
chr11:2290104-2292932	ASCL2	0.251188	0.731466	0.513688	2.87379e-05	4.76926e-05
chr11:2398223-2399598	CD81	0.651513	0.399277	0.65035	0.00413139	0.0042216
chr1:1355159-1356000	LOC441869	0.246114	0.704606	0.242811	8.2007e-05	0.000111856
chr11:44971048-44972685	TP53I11	0.271798	0.714388	0.322393	4.53854e-07	1.78415e-06
chr1:15127583-15127869	KIAA1026	0.848546	0.387756	0.76408	6.82574e-05	9.50728e-05
chr1:151965657-151966387	S100A10	0.742375	0.569043	0.479674	6.72777e-05	9.45725e-05
chr1:155051155-155055291	EFNA3	0.0428166	0.314602	0.0373055	0.000648855	0.000702927
chr11:57194340-57194650	SLC43A3	0.1685	0.691459	0.177247	2.30915e-07	1.10049e-06
chr11:57267006-57267316	SLC43A1	0.318395	0.620043	0.136344	0.000505117	0.000560177
chr11:63438301-63439314	ATL3	0.0959306	0.26184	0.0923659	0.000106353	0.000139813
chr11:64058808-64060118	KCNK4	0.175717	0.479356	0.196931	1.38785e-05	2.57743e-05
chr11:68181086-68181289	LRP5	0.227877	0.698973	0.328056	6.37577e-05	9.15294e-05
chr11:69461060-69461378	CCND1	0.293489	0.779257	0.486154	1.34055e-05	2.52197e-05
chr11:70508328-70508617	SHANK2	0.0698608	0.553446	0.0358515	0.00151303	0.00156659
chr11:77531186-77532262	C11orf67;RSF1	0.0206392	0.0297661	0.0227219	0.000173087	0.000215438
chr1:1850098-1851391	TMEM52	0.157319	0.43317	0.160106	5.03702e-06	1.12254e-05
chr11:94501366-94502696	AMOTL1	0.129665	0.606397	0.240661	9.14441e-07	3.08422e-06
chr1:201708787-201709429	NAV1	0.131545	0.592825	0.166656	0.000993173	0.00104216
chr1:203598471-203598853	ATP2B4	0.0631994	0.576532	0.0385299	3.45429e-07	1.49686e-06
chr1:204654132-204654885	LRRN2	0.49096	0.708279	0.710153	0.000115557	0.000148574
chr12:104697348-104697984	TXNRD1;EID3	0.0480038	0.363782	0.0380455	0.000859909	0.00091463
chr12:109592315-109592633	ACACB	0.176094	0.696734	0.273504	0.000123888	0.000157553
chr12:121078161-121079483	CABP1	0.12629	0.431209	0.205473	7.39888e-09	7.35055e-08
chr12:121416485-121416817	HNF1A	0.725296	0.147378	0.284724	4.62195e-09	6.00853e-08
chr1:2126048-2126642	C1orf86;LOC100128003	0.441291	0.792847	0.37298	1.54024e-05	2.81575e-05
chr12:130184541-130184852	TMEM132D	0.864608	0.304464	0.630952	1.56121e-06	4.45516e-06
chr12:130339683-130343584	TMEM132D	0.855435	0.311603	0.620892	9.85055e-08	5.48816e-07
chr12:130387609-130389139	TMEM132D	0.762905	0.25138	0.513714	2.15288e-05	3.73166e-05
chr12:131572501-131572945	GPR133	0.361978	0.288684	0.796992	0.000246534	0.000288685
chr12:133073397-133073632	FBRSL1	0.791415	0.466252	0.654961	5.81031e-07	2.12439e-06
chr1:2136808-2137351	C1orf86	0.352533	0.593265	0.278231	0.000246739	0.000288685
chr1:21616380-21617101	ECE1	0.0208995	0.532112	0.020191	0.000658869	0.000710486
chr1:225997646-225998233	EPHX1	0.232731	0.82602	0.197923	5.79525e-07	2.12439e-06
chr12:2800139-2801062	CACNA1C	0.331392	0.849123	0.363214	2.4513e-05	4.15654e-05
chr1:236156873-236157271	NID1	0.858247	0.499685	0.862599	6.23818e-06	1.31508e-05
chr12:47473177-47474120	AMIGO2	0.21328	0.82802	0.17196	4.11693e-07	1.75157e-06
chr12:48397889-48398731	COL2A1	0.0920817	0.519639	0.0746769	0.000327446	0.0003756
chr12:4918273-4919657	KCNA6	0.850651	0.911377	0.614913	9.26494e-05	0.000123182
chr12:54071053-54071265	ATP5G2	0.118682	0.547257	0.126009	1.05533e-06	3.33713e-06
chr12:54454249-54454458	FLJ12825	0.677162	0.315393	0.754711	4.65098e-07	1.78415e-06
chr12:5603587-5603990	NTF3	0.839253	0.282697	0.694168	2.63492e-05	4.43576e-05
chr1:26097904-26098107	MAN1C1	0.674294	0.204822	0.541951	2.26368e-07	1.10049e-06
chr12:99139386-99139769	ANKS1B	0.284003	0.700221	0.293678	9.07742e-05	0.000122076
chr13:111978588-111979099	C13orf16	0.791091	0.24828	0.676422	2.6235e-09	4.2488e-08
chr13:112726281-112728419	SOX1	0.294451	0.703052	0.103214	0.000197369	0.000238064
chr13:113622737-113623660	MCF2L	0.24074	0.715719	0.230142	4.13653e-06	9.58365e-06
chr13:113761566-113765534	F7	0.423075	0.487805	0.558921	0.00265035	0.00272009
chr13:113772727-113773012	F10	0.786123	0.0625894	0.585358	4.2626e-05	6.50519e-05
chr13:24734771-24735538	MIR2276;SPATA13	0.699181	0.0966404	0.356564	2.76472e-07	1.24412e-06
chr13:31480272-31481105	C13orf33	0.532572	0.165685	0.215439	2.5905e-06	6.71196e-06
chr14:101292043-101292709	MEG3	0.591471	0.828705	0.510139	2.4093e-06	6.33455e-06
chr14:104000887-104001138	TRMT61A	0.75578	0.217698	0.803999	1.85602e-08	1.4477e-07
chr14:105944421-105945700	CRIP2	0.256687	0.6993	0.243174	9.23448e-07	3.08422e-06
chr14:36983440-36983738	SFTA3	0.119478	0.731981	0.381034	0.000154457	0.000194317
chr14:37126786-37128274	PAX9	0.51191	0.0670728	0.142415	3.3506e-05	5.45371e-05
chr1:45278765-45279644	BTBD19	0.278078	0.692609	0.297068	3.45451e-09	5.05222e-08
chr14:65170876-65172007	PLEKHG3	0.734812	0.158619	0.17039	1.77795e-07	9.04437e-07
chr14:70655095-70656077	SLC8A3	0.0434288	0.730329	0.0752459	2.57358e-11	1.50554e-09
chr15:37179516-37179782	LOC145845	0.213269	0.664106	0.336446	7.00055e-06	1.41218e-05
chr1:54821990-54822333	SSBP3	0.75	0.121341	0.526843	9.70506e-07	3.15414e-06
chr15:71507368-71507696	THSD4	0.831288	0.395178	0.678832	3.71575e-06	8.78269e-06
chr15:82335472-82339937	MEX3B	0.307549	0.820761	0.7576	5.75602e-08	3.5445e-07
chr16:1029878-1035327	SOX8	0.219069	0.716233	0.20221	2.40548e-07	1.10369e-06
chr16:11680008-11681275	LITAF	0.060947	0.404916	0.0572322	5.69985e-05	8.44155e-05
chr16:24267040-24267527	CACNG3	0.645563	0.211825	0.341446	2.17739e-05	3.7464e-05
chr16:374732-375328	AXIN1	0.832948	0.198456	0.599548	8.9113e-09	8.3128e-08
chr1:6530536-6531814	PLEKHG5	0.326624	0.867474	0.680571	1.1802e-06	3.68223e-06
chr16:54317821-54324604	IRX3	0.43191	0.310864	0.267546	0.00057708	0.000636966
chr16:58059380-58061477	MMP15	0.0486632	0.404197	0.0542367	0.000338527	0.000386416
chr16:75284680-75285821	BCAR1	0.634215	0.221238	0.452398	1.68924e-06	4.747e-06
chr16:85670134-85670349	KIAA0182	0.376463	0.815506	0.29742	0.00059625	0.000651974
chr16:85676291-85676592	KIAA0182	0.419143	0.885884	0.373098	5.31568e-06	1.15173e-05
chr16:85684107-85684491	KIAA0182	0.383663	0.902286	0.372539	0.000117052	0.000149674
chr16:88554354-88554847	ZFPM1	0.876572	0.422815	0.506648	8.60526e-13	6.71211e-11
chr16:88599610-88601530	ZFPM1	0.196116	0.811947	0.658597	6.26464e-10	1.62881e-08
chr16:89641053-89643415	CPNE7	0.371518	0.788898	0.526175	8.34851e-05	0.000112922
chr17:14204168-14207702	HS3ST3B1;MGC12916	0.393875	0.866235	0.175168	0.00020828	0.000248661
chr17:152117-152438	RPH3AL	0.719385	0.135609	0.762598	7.81221e-05	0.000107533
chr17:17109893-17110296	PLD6	0.388722	0.930989	0.864441	0.00183663	0.00189326
chr17:27312969-27313283	SEZ6	0.22094	0.476736	0.239404	7.69804e-06	1.53961e-05
chr17:28088027-28088607	SSH2	0.0431628	0.450738	0.0380937	0.000635608	0.000691778
chr17:30813177-30815239	CDK5R1	0.290131	0.710839	0.447585	6.11066e-06	1.2999e-05
chr17:40937258-40937480	WNK4	0.304487	0.832363	0.678909	9.98679e-05	0.000132029
chr17:43044369-43046424	C1QL1	0.303368	0.791454	0.213171	5.76448e-05	8.47032e-05
chr17:46607804-46608390	HOXB1	0.832673	0.161471	0.722709	2.72359e-09	4.2488e-08
chr17:71431621-71431878	SDK2	0.77172	0.397021	0.737603	3.78506e-05	5.90469e-05
chr17:72352827-72353798	BTBD17	0.509294	0.0797647	0.139907	5.26348e-06	1.15173e-05
chr17:72931729-72932601	OTOP3	0.124682	0.556297	0.0764157	0.000267208	0.000309538
chr17:73127196-73127995	NT5C	0.120538	0.585401	0.103234	1.19244e-05	2.30604e-05
chr17:76228110-76228380	LOC283999	0.581304	0.178876	0.266339	1.64429e-05	2.95972e-05
chr17:77951845-77952291	TBC1D16	0.879143	0.786588	0.350539	1.8249e-09	3.55856e-08
chr17:79006584-79006835	FLJ90757	0.846707	0.165485	0.76911	2.64749e-08	1.87731e-07
chr17:79008929-79009762	BAIAP2	0.695192	0.191221	0.233246	2.39746e-05	4.09494e-05
chr17:79366806-79374742	BAHCC1	0.171959	0.88072	0.107346	3.17205e-06	7.81326e-06
chr17:981508-981748	ABR	0.270699	0.840309	0.47852	0.000128527	0.000162569
chr1:8085554-8086854	ERRFI1	0.841197	0.129275	0.611964	8.37806e-11	3.92093e-09
chr18:55103154-55108853	ONECUT2	0.338785	0.657889	0.082069	4.28119e-05	6.50519e-05
chr1:869332-871872	SAMD11	0.144452	0.681813	0.17665	4.45263e-08	2.81599e-07
chr18:72916107-72917233	ZADH2	0.658334	0.733121	0.188244	6.11527e-07	2.2015e-06
chr18:74799144-74800038	MBP	0.634705	0.349604	0.100841	0.00104279	0.00108934
chr1:90308839-90309606	LRRC8D	0.161214	0.619859	0.10183	0.000221635	0.000263262
chr19:13260562-13264924	IER2	0.0438439	0.608975	0.0530756	1.33351e-07	7.09339e-07
chr19:13616752-13617267	CACNA1A	0.828208	0.314003	0.729099	4.44185e-07	1.78415e-06
chr19:18699422-18700554	C19orf60	0.104464	0.483945	0.148421	7.51111e-08	4.28683e-07
chr19:46282544-46283127	DMPK	0.324185	0.809657	0.471249	8.12556e-06	1.61134e-05
chr19:46379883-46380207	FOXA3	0.593906	0.199596	0.212351	3.39642e-06	8.19343e-06
chr19:5036959-5037220	KDM4B	0.294496	0.770896	0.418725	0.000428182	0.000481704
chr20:17296125-17296531	PCSK2	0.788939	0.321365	0.604421	1.91187e-06	5.26327e-06
chr20:22548967-22549720	C20orf56	0.292845	0.790917	0.117025	2.43852e-08	1.78317e-07
chr20:33762403-33762774	PROCR	0.637846	0.226375	0.480311	0.000283598	0.000326906
chr20:35974177-35974913	SRC	0.871226	0.303775	0.690747	1.40263e-08	1.15362e-07
chr20:3776198-3776419	CDC25B	0.0918699	0.520713	0.181012	7.29509e-10	1.70705e-08
chr20:50417312-50419045	SALL4	0.221315	0.814894	0.307566	5.30871e-06	1.15173e-05
chr20:56283891-56285395	PMEPA1	0.143572	0.369648	0.230131	0.000111387	0.000144039
chr20:57607045-57607782	ATP5E	0.120554	0.505896	0.0959273	1.50277e-05	2.76888e-05
chr2:10182635-10184702	KLF11	0.060687	0.383315	0.0639586	2.86614e-08	1.97258e-07
chr2:102803672-102804556	IL1RL2	0.360529	0.600282	0.205417	1.24495e-05	2.36843e-05
chr2:105858587-105859084	GPR45	0.833848	0.414287	0.766069	1.59202e-05	2.88785e-05
chr2:1286393-1286642	SNTG2	0.871502	0.357738	0.824203	1.88371e-07	9.37845e-07
chr21:43186280-43187436	RIPK4	0.761361	0.102943	0.330076	9.75306e-09	8.45265e-08
chr2:1480758-1481631	TPO	0.835385	0.270867	0.654125	1.77504e-07	9.04437e-07
chr2:1493652-1494239	TPO	0.84583	0.288512	0.551257	4.62891e-07	1.78415e-06
chr2:1544272-1544489	TPO	0.87342	0.372366	0.674498	2.35148e-07	1.10049e-06
chr2:1651995-1653401	PXDN	0.878748	0.405555	0.728816	1.20299e-05	2.30737e-05
chr2:1669991-1670203	PXDN	0.848761	0.360905	0.663448	3.60859e-06	8.61642e-06
chr2:20865289-20867589	GDF7	0.0527636	0.442985	0.0533566	0.000582128	0.000639521
chr2:217497811-217498847	IGFBP2	0.0922112	0.399177	0.0873253	0.000187861	0.000230155
chr22:19746924-19747141	TBX1	0.0876185	0.624975	0.0521049	1.53313e-06	4.42903e-06
chr2:219848919-219850541	FEV	0.685765	0.0795772	0.668326	5.73791e-07	2.12439e-06
chr22:38200672-38201691	H1F0	0.165124	0.69375	0.220544	2.63663e-06	6.71196e-06
chr22:38610335-38610828	MAFF	0.373163	0.691473	0.418753	0.000234588	0.00027724
chr2:238768073-238768831	RAMP1	0.745446	0.0866656	0.581411	1.23622e-06	3.80626e-06
chr22:39638219-39640966	PDGFB	0.329046	0.696271	0.384394	2.77097e-05	4.63148e-05
chr2:240153476-240153792	HDAC4	0.331769	0.823138	0.251052	0.000415757	0.000469987
chr2:45169505-45171884	SIX3	0.697796	0.333235	0.331055	4.58327e-05	6.91926e-05
chr2:45235511-45237792	SIX2	0.576735	0.869788	0.158625	0.000108193	0.000141437
chr2:73151200-73152060	EMX1	0.183965	0.735877	0.13094	3.77157e-05	5.90469e-05
chr2:97173851-97174485	NEURL3	0.631326	0.103883	0.207297	7.19301e-09	7.35055e-08
chr3:128205495-128212274	GATA2	0.594155	0.151755	0.697012	3.56301e-05	5.67173e-05
chr3:13008648-13009210	IQSEC1	0.0972917	0.581315	0.0591072	2.15845e-08	1.62928e-07
chr3:134092257-134093741	AMOTL2	0.397008	0.500057	0.349734	0.0233537	0.023657
chr3:181444409-181445000	SOX2OT	0.63123	0.804211	0.227504	2.03972e-05	3.5619e-05
chr3:183542496-183543804	MAP6D1	0.0422003	0.492968	0.04124	1.34721e-05	2.52197e-05
chr3:183993905-183994347	ECE2	0.289125	0.640615	0.386737	2.00951e-06	5.46774e-06
chr3:45635090-45635932	LIMD1	0.714678	0.131993	0.476478	6.15914e-05	8.89654e-05
chr3:52279601-52280140	PPM1M	0.163981	0.524396	0.253573	1.47594e-06	4.31712e-06
chr3:77147167-77147399	ROBO2	0.814654	0.25094	0.682909	6.73387e-07	2.35183e-06
chr4:1164515-1166582	SPON2;LOC100130872-SPON2	0.797111	0.167105	0.341822	1.51442e-09	3.22159e-08
chr4:151500763-151501299	LRBA	0.858854	0.676807	0.331774	3.40937e-05	5.50202e-05
chr4:155254130-155254603	DCHS2	0.101765	0.785352	0.123242	1.71216e-13	2.00323e-11
chr4:25677808-25678132	SLC34A2	0.844784	0.514988	0.853862	2.28484e-09	4.11271e-08
chr4:40858884-40859162	APBB2	0.264124	0.690975	0.223486	0.000911016	0.000964605
chr4:5889203-5890645	CRMP1	0.246123	0.751522	0.264957	3.08059e-06	7.6687e-06
chr4:5894071-5895116	CRMP1	0.274253	0.706321	0.312004	1.42969e-08	1.15362e-07
chr4:62383013-62383248	LPHN3	0.791091	0.21222	0.476739	6.92687e-06	1.40947e-05
chr4:81118137-81118603	PRDM8	0.656313	0.0851898	0.263341	7.56395e-05	0.000104732
chr5:101834354-101834740	SLCO6A1	0.801486	0.436274	0.80936	6.23044e-08	3.73826e-07
chr5:125759047-125759298	GRAMD3	0.0441282	0.592715	0.0441766	0.000442078	0.000494958
chr5:141030918-141031177	FCHSD1	0.0722507	0.50799	0.068687	0.000253731	0.000295388
chr5:169533080-169533534	FOXI1	0.587618	0.124643	0.255531	4.86324e-06	1.09423e-05
chr5:174870753-174872345	DRD1	0.646959	0.0744796	0.203213	1.34742e-06	4.07483e-06
chr5:177821852-177823865	COL23A1	0.749323	0.231473	0.520855	0.000160503	0.000200843
chr5:180045789-180048897	FLT4	0.780781	0.381685	0.626733	6.33232e-09	7.22966e-08
chr5:180055849-180056126	FLT4	0.851366	0.36703	0.661152	3.9466e-08	2.56529e-07
chr5:180075688-180076906	FLT4	0.740238	0.270801	0.459795	1.3338e-07	7.09339e-07
chr5:58334836-58335881	PDE4D	0.0552311	0.594379	0.0573703	0.000349826	0.000397375
chr5:67584213-67584451	PIK3R1	0.689116	0.0878641	0.347708	9.23645e-09	8.3128e-08
chr6:106959764-106960985	AIM1	0.21333	0.318784	0.125175	0.0329193	0.0332031
chr6:143999154-143999667	PHACTR2	0.125264	0.533826	0.128771	0.000733696	0.000783949
chr6:144384894-144385888	PLAGL1	0.218587	0.795376	0.370349	3.79603e-08	2.53792e-07
chr6:30038881-30039477	RNF39	0.7661	0.778025	0.243066	1.42444e-06	4.21923e-06
chr6:30180933-30182187	TRIM26	0.548928	0.592004	0.361091	6.60767e-05	9.37088e-05
chr6:30687941-30688213	TUBB	0.165463	0.565359	0.202495	6.7494e-05	9.45725e-05
chr6:30852102-30852676	DDR1	0.72345	0.247304	0.704665	3.72339e-05	5.88697e-05
chr6:31619856-31620525	APOM	0.711823	0.86471	0.321211	0.000111415	0.000144039
chr6:32134460-32135196	EGFL8	0.843972	0.880277	0.535476	6.55798e-06	1.35802e-05
chr6:33172289-33172823	HSD17B8	0.213717	0.56404	0.226168	9.3581e-07	3.08422e-06
chr6:33282855-33283196	ZBTB22;TAPBP	0.120704	0.432365	0.101348	3.76927e-06	8.82008e-06
chr6:41528266-41528900	FOXP4	0.161625	0.720108	0.227665	6.35817e-06	1.3284e-05
chr6:44187186-44187400	SLC29A1	0.0706829	0.501132	0.0672792	0.000182494	0.000224755
chr7:127671158-127672853	LRRC4;SND1	0.679916	0.365507	0.704556	4.08056e-05	6.28191e-05
chr7:150822654-150823387	AGAP3	0.690906	0.77233	0.373491	5.87292e-06	1.26079e-05
chr7:157476886-157486719	PTPRN2	0.430341	0.530999	0.256911	0.00119182	0.00123949
chr7:2563610-2564056	LFNG	0.186111	0.67613	0.374997	3.45022e-05	5.52981e-05
chr7:2565872-2566114	LFNG	0.379012	0.84581	0.790141	2.85568e-07	1.26081e-06
chr7:42267546-42267823	GLI3	0.736571	0.824477	0.354371	3.13748e-05	5.17021e-05
chr7:4764684-4765252	FOXK1	0.546286	0.550384	0.405047	0.0228829	0.0232809
chr7:592620-593058	PRKAR1B	0.75085	0.235949	0.58182	3.83699e-09	5.2815e-08
chr7:8473139-8475199	NXPH1	0.526833	0.67509	0.264914	4.92648e-05	7.36415e-05
chr7:93204085-93204381	CALCR	0.102652	0.626265	0.0794408	9.13475e-05	0.000122145
chr8:145024449-145025179	PLEC1	0.658135	0.26388	0.176494	8.22192e-05	0.000111856
chr8:145555342-145562310	SCRT1	0.0820525	0.562795	0.179233	6.13347e-05	8.89654e-05
chr8:145730390-145732205	GPT	0.836034	0.72446	0.440881	8.76868e-06	1.72426e-05
chr8:1830748-1831008	ARHGEF10	0.878467	0.819411	0.606615	5.79167e-05	8.47032e-05
chr8:1949245-1951390	KBTBD11	0.0346081	0.547131	0.0504456	0.000194026	0.000236469
chr8:21914275-21914525	EPB49	0.725343	0.232649	0.355701	5.75827e-10	1.62881e-08
chr8:41165852-41167140	SFRP1	0.16279	0.558801	0.156425	3.87977e-05	6.01236e-05
chr8:41733535-41733911	ANK1	0.0839365	0.518171	0.0853352	0.000472517	0.000526519
chr8:8748652-8751478	MFHAS1	0.554868	0.856322	0.200368	1.1278e-05	2.19921e-05
chr9:123638820-123639936	PHF19	0.473564	0.870059	0.495079	2.68597e-06	6.75824e-06
chr9:131012454-131013429	DNM1	0.169492	0.702071	0.456967	4.38914e-10	1.60604e-08
chr9:94648653-94648964	ROR2	0.813877	0.515416	0.815867	4.63862e-06	1.05382e-05

## Sheet: CpG Probes
Supplementary File 4: Differentially Methylated Probes at CpG sites and CpG ISLAND
Differentially Methylated CpG Sites for LC subtypes
DMP CpG probes
SiteID	Chr	Loc	Gene	Island	LC1.avg.beta	LC2.avg.beta	LC33.avg.beta	annova.pvalue	annova.fdr
cg04284530	5	126367249	MARCH3	chr5:126365623-126367250	0.303539	0.770002	0.189569	0.000594449	0.020753
cg07035022	2	217204775	MARCH4		0.327453	0.700261	0.4996	0.000488883	0.0182586
cg22124215	2	217232992	MARCH4	chr2:217236025-217237129	0.742377	0.912326	0.536787	0.000391814	0.0157249
cg15928016	10	94064371	MARCH5		0.827233	0.892996	0.66114	0.0016634	0.0395759
cg10165829	5	10376628	MARCH6		0.892433	0.682692	0.308702	8.80421e-08	2.97683e-05
cg16008138	17	60885892	MARCH10	chr17:60885408-60885857	0.328124	0.253197	0.686192	0.000180607	0.00907152
cg19663795	16	30393854	SEPT1	chr16:30389035-30390631	0.517586	0.91822	0.710787	0.00045421	0.0173713
cg18860854	2	242293175	SEPT2	chr2:242295397-242296201	0.85936	0.367406	0.872983	8.4001e-07	0.000166755
cg15417365	17	56609082	SEPT4	chr17:56609025-56609583	0.0682398	0.330048	0.122578	0.000702543	0.0230309
cg01422249	5	132110968	SEPT8	chr5:132112448-132113621	0.763999	0.620282	0.37485	0.000945395	0.0278187
cg05627441	17	75278110	SEPT9	chr17:75277317-75278172	0.0405685	0.136705	0.0348733	0.0019796	0.0438839
cg03221483	17	75315081	SEPT9		0.84206	0.425247	0.821515	6.0136e-05	0.00409301
cg04650676	17	75315486	SEPT9		0.774045	0.084645	0.669161	9.21873e-05	0.00560141
cg03568017	17	75315503	SEPT9		0.580804	0.109871	0.483211	0.000787073	0.0247703
cg07101841	17	75315527	SEPT9		0.654005	0.11387	0.576616	6.85534e-05	0.00450957
cg02633924	17	75315563	SEPT9		0.604383	0.0754464	0.467565	0.000301104	0.0131012
cg25690715	17	75315567	SEPT9		0.646787	0.120343	0.552188	0.000183292	0.00916406
cg25416067	17	75315667	SEPT9		0.82673	0.198148	0.763787	5.83835e-05	0.00400642
cg19422205	17	75404563	SEPT9		0.936745	0.938259	0.91519	0.00115915	0.0316066
cg06513247	17	75446661	SEPT9	chr17:75447477-75447821	0.634046	0.355627	0.399047	0.000926972	0.0274672
cg16854986	4	77872417	SEPT11	chr4:77869440-77872122	0.0430242	0.610333	0.0340898	0.000651717	0.0219654
cg01215215	4	77878910	SEPT11		0.722073	0.813283	0.391779	5.47982e-05	0.00383166
cg13965272	9	117993982	DEC1		0.843923	0.222966	0.696958	0.000105395	0.00616079
cg14631486	9	118129853	DEC1		0.841894	0.162546	0.697706	2.40725e-05	0.00209702
cg14585967	9	118135710	DEC1		0.804663	0.212254	0.714948	0.000620807	0.0213343
cg27394794	10	52600370	A1CF		0.208218	0.881288	0.793156	7.10479e-08	2.50885e-05
cg10222734	10	52612019	A1CF		0.382555	0.897056	0.780838	3.86145e-06	0.000541567
cg03817621	10	52645399	A1CF		0.587668	0.190417	0.468336	0.000766364	0.0243947
cg06447474	16	6067747	A2BP1	chr16:6068914-6070401	0.853428	0.246024	0.861917	7.11043e-08	2.50885e-05
cg27083740	16	6071073	A2BP1	chr16:6068914-6070401	0.772041	0.363491	0.738662	6.69647e-06	0.000817377
cg00962147	16	6949843	A2BP1		0.23824	0.236865	0.645271	0.0021018	0.0454381
cg03529595	16	7056916	A2BP1		0.277959	0.212259	0.659434	0.00196926	0.0437529
cg06719334	16	7501308	A2BP1		0.203323	0.0648162	0.716084	0.000359218	0.0148242
cg02576228	16	7702102	A2BP1	chr16:7703811-7704090	0.381399	0.14838	0.675947	0.000204183	0.0098567
cg23669440	3	137851776	A4GNT		0.736573	0.509932	0.740941	0.00124735	0.0330772
cg23862011	7	34801131	AAA1;NPSR1		0.891531	0.449543	0.829522	0.00056393	0.0200329
cg00081087	7	34873912	AAA1;NPSR1		0.723732	0.236507	0.568727	0.000154572	0.00810889
cg17744825	7	34874018	AAA1;NPSR1		0.891945	0.439525	0.770771	0.0016629	0.039571
cg03538079	7	34874196	AAA1;NPSR1		0.86654	0.308478	0.777974	2.97996e-06	0.000444174
cg21881338	12	125566189	AACS	chr12:125569828-125570140	0.380603	0.924735	0.687786	0.0020666	0.0449694
cg07462279	15	67494178	AAGAB		0.868036	0.903591	0.850171	0.0011576	0.0315783
cg18992153	2	69785993	AAK1		0.869717	0.43051	0.856617	0.000105887	0.00617861
cg24171555	2	69852693	AAK1		0.872472	0.900444	0.80442	0.000872668	0.0265005
cg19292625	11	105951315	AASDHPPT	chr11:105948097-105948830	0.35851	0.831649	0.306873	0.00107932	0.0302339
cg09602562	11	105948187	AASDHPPT;KBTBD3	chr11:105948097-105948830	0.0234122	0.0318035	0.0227995	0.000529696	0.0192436
cg02975268	17	35309385	AATF	chr17:35305758-35306757	0.808421	0.659248	0.223376	1.79419e-08	8.59993e-06
cg14063654	9	107587595	ABCA1		0.931871	0.389045	0.549929	0.00013707	0.00745676
cg10626169	7	48319696	ABCA13		0.671699	0.169559	0.593655	0.00212711	0.0457601
cg03372042	7	48579509	ABCA13		0.842765	0.25126	0.476299	4.33545e-06	0.000589826
cg20561863	17	66905630	ABCA8		0.776929	0.464841	0.551106	0.00178823	0.0412913
cg12504828	17	66971371	ABCA9		0.668052	0.278223	0.613855	0.000141723	0.00764348
cg25477497	7	87228808	ABCB1	chr7:87229551-87229890	0.83232	0.275466	0.782279	0.000201075	0.00974881
cg06293745	7	87329407	ABCB1;RUNDC3B		0.704236	0.920377	0.294443	0.000678225	0.0225281
cg27007513	16	16216096	ABCC1		0.968146	0.789791	0.948843	4.0962e-05	0.00310769
cg04388863	16	48269349	ABCC11		0.619481	0.709466	0.24736	0.00143379	0.0360697
cg08404739	16	48269424	ABCC11		0.828881	0.827479	0.449969	3.18306e-06	0.00046637
cg04098547	16	48125057	ABCC12		0.850419	0.347385	0.910886	6.01605e-06	0.000754153
cg05599550	17	48711902	ABCC3	chr17:48712050-48712705	0.638769	0.455672	0.166354	2.9094e-05	0.00241578
cg26623266	17	48745283	ABCC3		0.836685	0.474017	0.794523	5.8296e-05	0.00400108
cg14592673	17	48768755	ABCC3		0.796103	0.191794	0.404431	4.29732e-05	0.00322242
cg10513161	3	183705727	ABCC5		0.795458	0.766464	0.510097	0.00227527	0.0476572
cg05044414	3	183734942	ABCC5	chr3:183735183-183736103	0.217212	0.871641	0.508651	5.47903e-06	0.000701316
cg11886949	11	17496473	ABCC8	chr11:17497463-17498626	0.797814	0.830722	0.595279	0.00244599	0.0497698
cg11689700	1	94983186	ABCD3		0.791738	0.163362	0.468565	1.23784e-07	3.80539e-05
cg20214535	21	43619310	ABCG1		0.648357	0.572507	0.250251	0.000839467	0.0258533
cg02370100	21	43655256	ABCG1	chr21:43654846-43655465	0.148609	0.426001	0.185045	2.47612e-05	0.00213987
cg00222799	21	43655464	ABCG1	chr21:43654846-43655465	0.398781	0.829201	0.403156	0.000494426	0.0184057
cg09518742	11	119020115	ABCG4	chr11:119019643-119020887	0.0209682	0.0284839	0.0207419	0.000560689	0.0199606
cg25033139	11	119020122	ABCG4	chr11:119019643-119020887	0.0157514	0.0196733	0.0150185	0.000198955	0.00968583
cg02341038	11	119020138	ABCG4	chr11:119019643-119020887	0.0143316	0.0199178	0.0145657	0.000313554	0.0134615
cg03157395	2	44065964	ABCG8;ABCG5		0.776015	0.561621	0.760023	7.20083e-05	0.00467286
cg25781162	2	44065996	ABCG8;ABCG5		0.858355	0.598015	0.857183	0.000251135	0.0114655
cg21052932	14	51342320	ABHD12B	chr14:51338712-51339146	0.859191	0.689502	0.371906	0.000843479	0.0259305
cg23124613	15	89731485	ABHD2		0.240432	0.754705	0.238786	1.038e-05	0.00112751
cg06813554	14	23066769	ABHD4	chr14:23067443-23067773	0.163201	0.794848	0.291136	1.28648e-05	0.00131944
cg00206999	3	58222569	ABHD6	chr3:58223101-58224364	0.161823	0.277886	0.0957117	0.00187478	0.0424815
cg27143326	3	58227354	ABHD6	chr3:58223101-58224364	0.843357	0.722195	0.338574	1.22317e-05	0.00127237
cg03443427	3	100489002	ABI3BP		0.785439	0.399265	0.736714	0.00245436	0.0498574
cg05763609	3	100535443	ABI3BP		0.715823	0.115689	0.562679	2.23026e-05	0.00198383
cg06675705	3	100560402	ABI3BP		0.728087	0.224877	0.779058	0.000100936	0.00598342
cg23634451	3	100713646	ABI3BP		0.641431	0.221278	0.359755	0.000849598	0.0260372
cg13440206	9	133736192	ABL1	chr9:133738154-133738408	0.80344	0.820435	0.368738	0.00101113	0.0290062
cg02915920	9	133736469	ABL1	chr9:133738154-133738408	0.69703	0.638794	0.161315	0.000532459	0.019305
cg04574732	1	179199939	ABL2	chr1:179198163-179199200	0.749896	0.127696	0.590853	0.000812594	0.0252896
cg12639574	1	179200312	ABL2	chr1:179198163-179199200	0.803798	0.375799	0.701078	0.000180578	0.00907117
cg16327338	10	116232841	ABLIM1		0.808852	0.885275	0.340846	2.63861e-11	4.29217e-08
cg06539091	10	116390942	ABLIM1	chr10:116391466-116391827	0.737146	0.696065	0.202272	0.00047033	0.0177908
cg05064181	10	116445398	ABLIM1		0.730357	0.298964	0.893011	0.00029464	0.0129001
cg04492193	4	8135668	ABLIM2		0.524791	0.838834	0.50348	0.002462	0.0499282
cg05116694	4	8137019	ABLIM2		0.971977	0.963756	0.877206	0.00120679	0.0323883
cg01081775	4	8158359	ABLIM2	chr4:8159728-8160893	0.305547	0.747363	0.247871	3.57527e-06	0.000508858
cg03984866	4	8161776	ABLIM2	chr4:8159728-8160893	0.212928	0.66954	0.207494	7.05002e-06	0.000845053
cg06818865	9	136151958	ABO	chr9:136150031-136151365	0.815225	0.264137	0.874776	6.03359e-06	0.000755893
cg17298275	17	934652	ABR	chr17:934417-935088	0.248398	0.922873	0.144996	0.000837311	0.0258158
cg15485247	17	981518	ABR	chr17:981508-981748	0.241595	0.962421	0.642387	0.000946662	0.027841
cg11829371	17	981724	ABR	chr17:981508-981748	0.298755	0.958129	0.653467	0.0022228	0.0470134
cg05825400	17	982115	ABR	chr17:981508-981748	0.260321	0.528678	0.260962	3.19888e-05	0.00259259
cg00905220	17	982154	ABR	chr17:981508-981748	0.282123	0.912009	0.357264	1.68973e-07	4.83822e-05
cg16374343	17	1014352	ABR	chr17:1011844-1012968	0.373058	0.776348	0.586575	4.38856e-05	0.00327301
cg06191034	17	1090123	ABR		0.826505	0.404012	0.528955	0.000536492	0.019395
cg04318619	17	1090300	ABR		0.843532	0.514294	0.571961	0.00216486	0.046264
cg18353563	3	127390935	ABTB1;PODXL2	chr3:127391011-127392434	0.0999536	0.341887	0.160617	4.23482e-05	0.00318641
cg15649702	11	34177094	ABTB2		0.467357	0.147342	0.388324	0.00102207	0.0292022
cg10835651	11	34340108	ABTB2		0.877387	0.650604	0.520956	0.00160431	0.0387084
cg06069310	3	38179874	ACAA1;MYD88	chr3:38179857-38180689	0.0425335	0.583401	0.0706729	0.00133751	0.034615
cg17034030	3	38179885	ACAA1;MYD88	chr3:38179857-38180689	0.024675	0.124661	0.0290307	0.00154558	0.0378428
cg06002638	12	109592017	ACACB	chr12:109592315-109592633	0.547674	0.955476	0.847392	0.000410782	0.0162354
cg15106368	12	109592348	ACACB	chr12:109592315-109592633	0.0208225	0.574996	0.0277541	0.000806745	0.0251796
cg19598685	12	109592525	ACACB	chr12:109592315-109592633	0.11189	0.626945	0.162089	0.000565454	0.0200698
cg06516150	12	109592528	ACACB	chr12:109592315-109592633	0.023988	0.62952	0.0567823	0.000712424	0.0232454
cg24768164	12	121163261	ACADS	chr12:121163472-121163913	0.0351051	0.520106	0.0502419	1.08373e-05	0.00116395
cg06793505	12	121164278	ACADS	chr12:121163472-121163913	0.453494	0.909314	0.314067	0.000278034	0.0123431
cg07343187	15	89390622	ACAN		0.856027	0.719505	0.977915	0.00241903	0.0494207
cg08324090	17	7253189	ACAP1	chr17:7253298-7253764	0.379592	0.79672	0.316613	0.00211135	0.0455517
cg05962325	11	107992005	ACAT1	chr11:107992004-107992731	0.0706411	0.362208	0.153081	0.00139837	0.0355182
cg25472589	11	107995927	ACAT1	chr11:107992004-107992731	0.640692	0.317644	0.519417	0.000429394	0.0167326
cg26476574	10	27485901	ACBD5		0.736343	0.250699	0.838355	2.51514e-06	0.000389649
cg04576568	2	220377822	ACCN4	chr2:220377743-220377946	0.165266	0.593713	0.0275888	0.0020287	0.0444862
cg02529035	2	220377885	ACCN4	chr2:220377743-220377946	0.185935	0.497316	0.110109	0.00170584	0.0401785
cg11248254	2	220378659	ACCN4	chr2:220377743-220377946	0.380954	0.705605	0.563921	0.000100525	0.00596451
cg14686207	11	44069008	ACCSL		0.5661	0.310819	0.67364	0.00119177	0.0321397
cg14824670	7	100492175	ACHE	chr7:100492217-100494941	0.230932	0.604535	0.144853	0.000867758	0.0264057
cg12641024	17	40070691	ACLY	chr17:40074291-40075380	0.607923	0.404641	0.278086	0.000192759	0.00948848
cg27470486	17	40073688	ACLY	chr17:40074291-40075380	0.514212	0.0984645	0.154303	7.72062e-05	0.00492052
cg14583225	17	40074010	ACLY	chr17:40074291-40075380	0.753283	0.41572	0.583218	0.00243133	0.0495935
cg18766847	2	135595627	ACMSD		0.857304	0.208602	0.763701	4.35525e-06	0.000591741
cg08172947	22	41868550	ACO2	chr22:41864420-41865443	0.646851	0.473924	0.18893	0.000168937	0.00864807
cg10976772	1	6390595	ACOT7		0.84874	0.537822	0.801386	0.00170821	0.0402045
cg05045598	1	6418521	ACOT7		0.737928	0.247837	0.726922	0.000767183	0.0244128
cg16049283	1	6419606	ACOT7		0.709646	0.0468621	0.705403	2.91424e-05	0.00241932
cg10375954	1	6419608	ACOT7		0.641178	0.103086	0.631269	7.00108e-05	0.0045774
cg16306654	1	6419767	ACOT7		0.586323	0.131998	0.462286	0.00067583	0.0224955
cg00821310	1	6420733	ACOT7		0.88469	0.620247	0.506655	0.0023884	0.0490448
cg12082302	1	6421246	ACOT7		0.862013	0.265868	0.663175	8.90299e-06	0.00100396
cg02065192	1	6421414	ACOT7		0.83772	0.726276	0.548875	0.000179464	0.00903568
cg09273516	1	6454339	ACOT7	chr1:6452814-6454185	0.0703036	0.449711	0.0683186	0.000584104	0.0205105
cg23652987	3	58508149	ACOX2		0.451372	0.109664	0.204405	0.000206441	0.00993207
cg17949316	4	8389808	ACOX3	chr4:8388395-8388671	0.936621	0.789214	0.950039	1.62189e-08	7.86533e-06
cg00325918	2	111498847	ACOXL		0.71639	0.278728	0.589466	1.63114e-05	0.00157583
cg06861011	2	111525213	ACOXL		0.909124	0.553895	0.869465	1.80826e-08	8.65733e-06
cg21469370	2	111530327	ACOXL		0.72942	0.290988	0.467813	2.66577e-05	0.00226866
cg12966876	2	111873850	ACOXL	chr2:111875206-111880965	0.825921	0.501649	0.80621	0.000966261	0.0282125
cg24392132	12	6753626	ACRBP	chr12:6756001-6756679	0.685353	0.318327	0.718354	0.000504036	0.0186425
cg18084923	19	6191871	ACSBG2		0.908623	0.931243	0.904332	0.00150282	0.0371435
cg01942849	16	89169744	ACSF3	chr16:89167763-89167991	0.892559	0.421549	0.544458	0.00063217	0.0215619
cg05145233	16	89169858	ACSF3	chr16:89167763-89167991	0.868826	0.24306	0.269064	1.11208e-09	9.5131e-07
cg16488021	16	89182099	ACSF3		0.728288	0.277524	0.87975	6.38597e-05	0.00426896
cg02009395	16	20702744	ACSM1		0.337233	0.0927041	0.726504	0.000668365	0.022328
cg10081980	16	20703595	ACSM1		0.66	0.475578	0.681661	0.00201796	0.0443353
cg00394823	16	20775166	ACSM3		0.512603	0.0878409	0.390246	0.00165568	0.0394765
cg04428453	16	20420652	ACSM5		0.798358	0.483594	0.850758	0.00152365	0.0375003
cg02147009	16	20451770	ACSM5		0.745301	0.179134	0.70148	0.00033122	0.0139702
cg25971823	20	33515143	ACSS2		0.870872	0.568932	0.834106	1.02116e-05	0.00111295
cg26479099	10	90712948	ACTA2		0.830795	0.486906	0.845789	6.438e-06	0.000793532
cg23239891	19	8808017	ACTL9	chr19:8807813-8808794	0.4831	0.394433	0.795121	0.00211227	0.0455537
cg13777668	14	69351311	ACTN1		0.663046	0.173669	0.261234	2.25773e-05	0.00200223
cg02951766	14	69354819	ACTN1		0.834339	0.653403	0.790565	1.96553e-05	0.00180509
cg13693582	14	69441902	ACTN1	chr14:69444639-69446826	0.298127	0.751226	0.176781	0.000482863	0.0181387
cg26303870	14	69443683	ACTN1	chr14:69444639-69446826	0.535358	0.765104	0.30368	0.00185505	0.0422289
cg17482237	1	236900382	ACTN2		0.696657	0.108596	0.745785	0.000133247	0.00730402
cg09932312	1	236902765	ACTN2		0.862824	0.59103	0.901951	5.87661e-05	0.004028
cg18412431	1	236925910	ACTN2		0.839036	0.477128	0.835728	0.00100687	0.0289361
cg07504040	1	236925965	ACTN2		0.812474	0.124251	0.785708	4.47362e-07	0.000102846
cg03575974	19	39214854	ACTN4	chr19:39217530-39217857	0.954207	0.964898	0.95419	0.00107638	0.0301802
cg11123847	14	58702245	ACTR10		0.560482	0.86497	0.275012	0.00188548	0.0426342
cg14734904	12	100594794	ACTR6	chr12:100594486-100594799	0.0352898	0.0241168	0.0353947	0.00138303	0.0353151
cg08146621	2	158453928	ACVR1C	chr2:158453799-158454111	0.22361	0.635748	0.220997	0.000439939	0.0170167
cg21233506	2	148653986	ACVR2A		0.929476	0.947659	0.932765	5.44352e-05	0.00381597
cg13899814	12	52309178	ACVRL1	chr12:52309034-52309337	0.84377	0.90414	0.528399	0.00051928	0.0190174
cg12075442	14	75531959	ACYP1	chr14:75535825-75536376	0.459588	0.230699	0.209137	0.00237916	0.0489292
cg04746945	2	54481922	ACYP2;TSPYL6	chr2:54482924-54483434	0.9363	0.807179	0.89969	3.02805e-05	0.00248506
cg02953302	10	127730564	ADAM12		0.289419	0.0399882	0.463272	0.0017388	0.0406237
cg26969179	10	127738328	ADAM12		0.846161	0.256756	0.82605	9.14449e-11	1.21499e-07
cg16018302	10	128074961	ADAM12	chr10:128076155-128077482	0.897199	0.940305	0.911562	0.000880579	0.026633
cg26232102	1	155024228	ADAM15	chr1:155022988-155024332	0.0451668	0.160032	0.0579781	7.9094e-05	0.0050098
cg03379131	1	155024281	ADAM15	chr1:155022988-155024332	0.093164	0.482416	0.0924894	1.84057e-08	8.7714e-06
cg12719510	1	155024394	ADAM15	chr1:155022988-155024332	0.0668828	0.282518	0.0649823	2.08782e-05	0.00188761
cg20954777	14	70924294	ADAM21		0.694027	0.404221	0.772986	5.40845e-05	0.00379718
cg14825462	7	87564570	ADAM22	chr7:87563342-87564571	0.120643	0.341413	0.120224	0.000898746	0.0269561
cg16970580	8	38874540	ADAM9		0.67926	0.914525	0.305453	0.00198935	0.0439666
cg02827007	19	8661081	ADAMTS10	chr19:8661080-8661287	0.401245	0.823469	0.679709	0.000839577	0.0258545
cg15503625	19	8666075	ADAMTS10	chr19:8669958-8670209	0.377957	0.804781	0.708321	0.000436177	0.0169168
cg06448603	5	33659084	ADAMTS12		0.710397	0.247769	0.387353	0.000452117	0.0173143
cg21874902	5	33727007	ADAMTS12		0.810504	0.212458	0.337301	1.65886e-05	0.00159655
cg03592903	5	33737936	ADAMTS12		0.619994	0.0646425	0.182757	3.91865e-05	0.00300779
cg12917072	5	33758285	ADAMTS12		0.928584	0.378739	0.543408	0.000638734	0.0216924
cg23359363	5	33764247	ADAMTS12		0.919071	0.500499	0.673146	0.00193726	0.0433427
cg10627511	5	33772916	ADAMTS12		0.711731	0.195743	0.176609	2.47441e-06	0.000385362
cg07700393	5	33788976	ADAMTS12		0.705714	0.218116	0.388563	0.00149404	0.0369931
cg07043044	5	33835713	ADAMTS12		0.695762	0.334239	0.567062	5.00053e-05	0.00359453
cg04578894	5	33842297	ADAMTS12		0.759871	0.200523	0.379319	0.00020672	0.00994083
cg21569398	5	33855241	ADAMTS12		0.722351	0.303324	0.185706	0.000252819	0.0115233
cg01990593	5	33890324	ADAMTS12	chr5:33892191-33892403	0.578292	0.0354606	0.174726	0.000206966	0.00994994
cg18519308	5	33892621	ADAMTS12	chr5:33892191-33892403	0.648371	0.274046	0.146562	3.42914e-05	0.00272103
cg00115654	9	136294920	ADAMTS13	chr9:136294738-136295236	0.348313	0.608756	0.233731	0.00143275	0.0360522
cg23169883	10	72435301	ADAMTS14	chr10:72432242-72432738	0.9165	0.260556	0.631201	0.000101469	0.00600295
cg18886109	10	72514348	ADAMTS14		0.641545	0.177395	0.547525	0.000722315	0.0234312
cg10773249	11	130343309	ADAMTS15	chr11:130342956-130343652	0.42924	0.214071	0.528321	0.00219218	0.0466125
cg24321787	11	130343533	ADAMTS15	chr11:130342956-130343652	0.708752	0.387213	0.686265	0.00132234	0.0343601
cg19813025	5	5139643	ADAMTS16	chr5:5139441-5140941	0.141878	0.375892	0.17351	0.00137924	0.0352553
cg05563287	15	100881162	ADAMTS17	chr15:100880957-100882438	0.0729075	0.254178	0.0628349	0.00192684	0.0431877
cg25930161	5	178551993	ADAMTS2	chr5:178551777-178552120	0.64691	0.469829	0.836308	0.00211844	0.0456296
cg21043746	5	178565721	ADAMTS2	chr5:178565716-178565918	0.690259	0.440048	0.770714	0.000394816	0.0157963
cg10843796	5	178651200	ADAMTS2	chr5:178651051-178651328	0.966293	0.853684	0.969268	0.000875151	0.0265466
cg20156545	21	28335020	ADAMTS5	chr21:28337856-28340237	0.867255	0.879676	0.566175	0.00188147	0.042576
cg02800810	21	28340139	ADAMTS5	chr21:28337856-28340237	0.492432	0.401949	0.0661818	0.00124561	0.0330459
cg21033632	5	64486421	ADAMTS6		0.839441	0.297786	0.718017	0.000402657	0.0160154
cg24917241	11	130275321	ADAMTS8		0.886108	0.780162	0.879167	9.37181e-05	0.00566775
cg06476693	11	130283454	ADAMTS8		0.722793	0.133242	0.609373	0.000189948	0.00939817
cg02147292	11	130286439	ADAMTS8		0.309794	0.0791443	0.259806	0.00121727	0.0325636
cg13953900	9	18622331	ADAMTSL1		0.782704	0.372681	0.267246	8.52775e-06	0.000970383
cg06294856	9	18776340	ADAMTSL1	chr9:18776758-18777743	0.91	0.348843	0.37817	1.25382e-06	0.000227315
cg14280905	9	136424187	ADAMTSL2	chr9:136426124-136426390	0.489572	0.722582	0.31335	0.000596481	0.0208099
cg21377071	15	84323963	ADAMTSL3	chr15:84322322-84323771	0.789147	0.884472	0.654655	0.00136637	0.0350587
cg22485810	17	29248725	ADAP2	chr17:29248847-29249926	0.318295	0.691842	0.270036	0.000216973	0.0103032
cg25012577	1	154600682	ADAR	chr1:154599763-154600505	0.0825909	0.415145	0.0813403	1.1503e-05	0.00121678
cg13392022	1	154600693	ADAR	chr1:154599763-154600505	0.216099	0.740232	0.19566	2.81401e-07	7.21266e-05
cg06315974	1	154600712	ADAR	chr1:154599763-154600505	0.164659	0.577721	0.169917	6.42441e-05	0.004287
cg27336068	10	1336103	ADARB2		0.787815	0.0426886	0.836597	6.25208e-09	3.81004e-06
cg06028247	10	1686427	ADARB2		0.215725	0.836089	0.30026	1.37059e-06	0.000243567
cg00525508	10	1749360	ADARB2		0.914221	0.864916	0.901797	0.00139138	0.0354057
cg17381426	7	140374125	ADCK2	chr7:140372743-140373443	0.456882	0.816302	0.584657	0.000290421	0.0127624
cg06223834	16	4103161	ADCY9		0.136497	0.740382	0.37912	0.000764114	0.02434
cg05765011	16	4103225	ADCY9		0.119079	0.902579	0.479346	8.79175e-06	0.000994667
cg09262171	16	4140361	ADCY9		0.721958	0.203387	0.681249	0.000519547	0.0190197
cg17822807	7	31107864	ADCYAP1R1		0.775525	0.347301	0.559624	0.000610201	0.0211203
cg04879561	7	31126531	ADCYAP1R1		0.601971	0.173346	0.395897	0.000466767	0.0176882
cg12655250	4	2860776	ADD1		0.872739	0.906837	0.853819	0.00103157	0.0293827
cg15016734	2	70889324	ADD2		0.891928	0.555563	0.790345	0.00206693	0.0449713
cg16230755	10	111812447	ADD3		0.691167	0.896423	0.411307	0.000374205	0.0152538
cg01728552	4	100274710	ADH1C		0.364188	0.360702	0.582573	0.00119236	0.0321476
cg10099209	4	100140474	ADH6		0.651293	0.084928	0.290208	0.000267434	0.0120145
cg03900851	8	67351768	ADHFE1	chr8:67351287-67351839	0.0229318	0.0544508	0.0245476	0.00141412	0.0357555
cg16332701	2	3502815	ADI1	chr2:3504282-3504628	0.890598	0.914406	0.890063	0.00165935	0.0395328
cg00924278	2	3504397	ADI1	chr2:3504282-3504628	0.881252	0.634775	0.889096	3.75247e-05	0.00290193
cg20656975	2	3507718	ADI1	chr2:3504282-3504628	0.947552	0.959548	0.942405	0.00196648	0.0437111
cg12193943	12	1885861	ADIPOR2		0.770046	0.849812	0.763901	0.00197368	0.0437974
cg04034517	10	76262877	ADK		0.707921	0.745989	0.27805	2.82434e-09	2.00163e-06
cg07911953	10	76345850	ADK		0.0850731	0.0494863	0.0693396	0.000627502	0.0214579
cg05149386	11	10325809	ADM	chr11:10326048-10326590	0.0760516	0.585356	0.122878	0.00184967	0.0421602
cg19315081	11	10326100	ADM	chr11:10326048-10326590	0.0700292	0.484765	0.0622693	0.000756118	0.0241527
cg02843237	11	10326289	ADM	chr11:10326048-10326590	0.0210468	0.287805	0.0211524	0.00229848	0.047946
cg14630839	22	50919823	ADM2	chr22:50919453-50920376	0.0204814	0.0613052	0.0206855	4.81063e-06	0.000634824
cg19580792	10	64568066	ADO	chr10:64564435-64565818	0.847675	0.87324	0.519685	4.97104e-05	0.00357887
cg10862018	15	73077046	ADPGK	chr15:73075586-73076663	0.749733	0.82446	0.525775	0.000950812	0.027917
cg05961212	3	119298195	ADPRH	chr3:119298284-119298983	0.0819334	0.581634	0.0696246	0.000274054	0.0122268
cg17283447	3	119298222	ADPRH	chr3:119298284-119298983	0.0936931	0.635486	0.101094	3.00414e-05	0.0024716
cg18027174	3	119298236	ADPRH	chr3:119298284-119298983	0.162453	0.659968	0.292021	0.000625194	0.0214096
cg20619751	13	114092131	ADPRHL1	chr13:114096050-114096317	0.518317	0.234814	0.144699	7.67372e-05	0.00489592
cg20773767	13	114107931	ADPRHL1		0.459884	0.151389	0.199475	0.000699485	0.0229702
cg21834032	13	114108433	ADPRHL1		0.910079	0.443893	0.796277	0.00187534	0.0424875
cg12912869	13	114108515	ADPRHL1		0.832324	0.415193	0.797679	0.00114921	0.0314507
cg23328194	8	26687962	ADRA1A		0.536057	0.113656	0.45397	0.000218215	0.0103419
cg26088662	5	159399005	ADRA1B	chr5:159399004-159399928	0.147272	0.734653	0.195716	2.14229e-06	0.000343744
cg10441628	5	159399432	ADRA1B	chr5:159399004-159399928	0.176634	0.61082	0.204394	0.00111398	0.0308409
cg03825010	5	159399506	ADRA1B	chr5:159399004-159399928	0.0577677	0.574923	0.064988	0.00137859	0.0352461
cg25976621	20	4205487	ADRA1D	chr20:4202148-4202765	0.533323	0.920114	0.880046	0.000433807	0.0168509
cg25869950	2	96779778	ADRA2B	chr2:96781406-96782971	0.651325	0.825336	0.86825	0.00176616	0.0409803
cg02086094	4	3769558	ADRA2C	chr4:3767072-3769789	0.328973	0.634876	0.476766	0.000367358	0.0150564
cg04731714	11	67049212	ADRBK1	chr11:67052394-67053110	0.798445	0.878053	0.819023	0.000688079	0.0227347
cg03992063	1	244615947	ADSS	chr1:244614522-244615601	0.56259	0.86251	0.308798	8.25802e-05	0.00516737
cg02290264	1	244616177	ADSS	chr1:244614522-244615601	0.915634	0.929198	0.657121	0.000876416	0.0265761
cg20359930	7	44153188	AEBP1	chr7:44153157-44153501	0.356989	0.906989	0.331843	7.74447e-05	0.00493049
cg16731821	7	44153333	AEBP1	chr7:44153157-44153501	0.555375	0.89692	0.374349	0.000549114	0.0197099
cg03131064	19	3062986	AES	chr19:3061188-3061952	0.0767658	0.409563	0.103751	0.00197412	0.0438009
cg06692974	5	148700400	AFAP1L1		0.796161	0.269507	0.272461	1.1561e-05	0.00122167
cg20048434	10	116163160	AFAP1L2	chr10:116163391-116164599	0.364281	0.745851	0.266152	0.00137262	0.0351542
cg06346505	10	116164640	AFAP1L2	chr10:116163391-116164599	0.619938	0.813805	0.238189	0.00175933	0.0408975
cg19533294	4	87857667	AFF1	chr4:87855873-87857204	0.654459	0.157431	0.331908	0.00183584	0.0419632
cg18675847	4	87865779	AFF1		0.947998	0.965516	0.938105	0.000528838	0.019228
cg15436606	4	87881747	AFF1		0.43241	0.709052	0.157593	2.71958e-06	0.000413264
cg17455261	4	87882899	AFF1		0.153053	0.244615	0.522094	0.00235316	0.0486318
cg17362661	2	100210490	AFF3	chr2:100210147-100210491	0.738727	0.873266	0.582023	0.00127413	0.0335418
cg02245998	2	100210626	AFF3	chr2:100210147-100210491	0.29863	0.583694	0.147207	0.000352492	0.0146153
cg12126990	2	100588044	AFF3		0.370171	0.75528	0.208752	0.000127996	0.00709523
cg11428546	2	100723110	AFF3	chr2:100720385-100720741	0.863462	0.0849005	0.864852	3.91949e-14	2.18843e-10
cg12042952	2	100723240	AFF3	chr2:100720385-100720741	0.674434	0.0698099	0.526965	5.05299e-05	0.00362272
cg03393607	2	100723417	AFF3	chr2:100720385-100720741	0.899786	0.510639	0.888333	0.00128367	0.0337221
cg26649904	2	236407361	AGAP1	chr2:236401799-236403946	0.723695	0.284678	0.52846	0.00165351	0.0394543
cg25846061	2	236415673	AGAP1		0.319486	0.909225	0.549814	7.75762e-05	0.00493801
cg09701233	2	236415814	AGAP1		0.236528	0.682294	0.380857	0.00215604	0.0461704
cg10647547	2	236447792	AGAP1	chr2:236443815-236444025	0.873247	0.565646	0.77483	0.00144082	0.036187
cg07164047	2	236486625	AGAP1		0.387416	0.90548	0.346977	3.54002e-05	0.00278494
cg17147638	2	236509769	AGAP1	chr2:236506378-236506728	0.573884	0.288074	0.334896	0.00231463	0.0481555
cg07291256	2	236574643	AGAP1	chr2:236578080-236580153	0.0436474	0.0664027	0.0357641	0.00228218	0.0477391
cg03451670	2	236579469	AGAP1	chr2:236578080-236580153	0.0616243	0.626042	0.042516	0.00139613	0.0354809
cg04188555	2	236579949	AGAP1	chr2:236578080-236580153	0.160894	0.52895	0.105007	0.00221432	0.0469012
cg19761110	2	236774071	AGAP1	chr2:236773883-236774084	0.702063	0.873074	0.262559	1.44392e-07	4.26441e-05
cg11700824	10	88730823	AGAP11	chr10:88730554-88731632	0.0586805	0.309903	0.0522049	6.68076e-05	0.00442148
cg17876497	10	88731295	AGAP11	chr10:88730554-88731632	0.0741044	0.423194	0.0753545	0.00103424	0.0294219
cg25323057	10	88730481	AGAP11;C10orf116	chr10:88730554-88731632	0.256785	0.870534	0.312496	0.0023923	0.0490931
cg06744119	10	88730599	AGAP11;C10orf116	chr10:88730554-88731632	0.240699	0.941317	0.397836	0.00177147	0.0410509
cg07847101	7	150785000	AGAP3	chr7:150783480-150785040	0.116133	0.0769239	0.0851888	3.63302e-05	0.00283972
cg05790828	7	150822006	AGAP3	chr7:150822654-150823387	0.449891	0.369226	0.749866	3.63508e-05	0.00284026
cg07429146	7	150822655	AGAP3	chr7:150822654-150823387	0.804998	0.923601	0.280853	5.29205e-07	0.00011699
cg03714522	7	150822902	AGAP3	chr7:150822654-150823387	0.592271	0.751009	0.161346	5.73266e-07	0.000124532
cg25417842	7	150822987	AGAP3	chr7:150822654-150823387	0.871196	0.967325	0.276927	2.9259e-06	0.00043798
cg14446604	7	150823386	AGAP3	chr7:150822654-150823387	0.736172	0.850491	0.39846	4.75577e-06	0.000629151
cg20975733	15	87155056	AGBL1		0.700244	0.0975728	0.721018	0.00217191	0.0463644
cg24097460	7	134671024	AGBL3	chr7:134671119-134671750	0.102511	0.43871	0.0805904	0.00163652	0.039205
cg03431524	7	100142441	AGFG2		0.403259	0.838561	0.571993	0.000421827	0.0165469
cg18991321	7	100144475	AGFG2		0.502554	0.915016	0.45598	0.00145095	0.0363388
cg18377446	1	100335651	AGL		0.775675	0.729055	0.467689	0.00061121	0.0211364
cg14464245	9	139580482	AGPAT2	chr9:139580969-139582615	0.615199	0.158933	0.479869	0.00202355	0.0444204
cg01331461	21	45345152	AGPAT3		0.758051	0.413454	0.426453	0.000113722	0.0065034
cg05957544	21	45360804	AGPAT3	chr21:45363473-45363799	0.921106	0.812433	0.61369	0.000320152	0.0136483
cg09498014	6	161575585	AGPAT4		0.966856	0.955126	0.965474	0.0018196	0.0417673
cg08424166	6	161592221	AGPAT4		0.351496	0.942994	0.625718	0.000100222	0.00595303
cg09043403	6	161648811	AGPAT4		0.638095	0.933	0.36724	0.00222195	0.0470003
cg16702815	7	16920271	AGR3		0.885403	0.128684	0.907455	2.42122e-14	1.53906e-10
cg11039314	7	16921699	AGR3		0.900181	0.311791	0.899089	9.00801e-07	0.000176226
cg02632261	1	963599	AGRN	chr1:963795-964507	0.472401	0.749892	0.833667	0.000155514	0.00814035
cg16502826	1	970237	AGRN	chr1:967966-970238	0.458614	0.784319	0.603646	0.00137417	0.0351733
cg18147233	1	970294	AGRN	chr1:967966-970238	0.443424	0.81318	0.655603	0.00190987	0.0429357
cg07502417	1	230849801	AGT		0.696282	0.280595	0.654267	0.00101724	0.0291109
cg01083716	1	230849856	AGT		0.576651	0.105831	0.311694	0.00239785	0.0491581
cg13543833	9	88309142	AGTPBP1		0.860779	0.915496	0.888872	0.000750143	0.0240303
cg23067351	4	109683730	AGXT2L1	chr4:109683729-109684362	0.109368	0.403972	0.131445	1.06763e-05	0.00115056
cg17172373	20	32886979	AHCY	chr20:32890559-32891378	0.864505	0.895336	0.860326	0.002201	0.0467047
cg00582941	20	32888855	AHCY	chr20:32890559-32891378	0.678081	0.369915	0.328029	1.33086e-05	0.00135243
cg24681307	1	110526191	AHCYL1	chr1:110527248-110528026	0.41048	0.14063	0.299925	0.00174278	0.0406635
cg08091439	1	110546703	AHCYL1		0.763073	0.20498	0.684894	0.000147619	0.00785686
cg10364249	1	27901698	AHDC1	chr1:27901660-27902688	0.137894	0.677244	0.140078	3.13407e-05	0.00255157
cg11697038	1	27931284	AHDC1	chr1:27929705-27930866	0.484624	0.887781	0.678463	0.00192737	0.0431923
cg15797527	6	135814781	AHI1	chr6:135818501-135819160	0.669742	0.201063	0.531641	7.24367e-05	0.00468962
cg04208124	11	62272972	AHNAK		0.269528	0.821981	0.269549	6.36601e-05	0.00426008
cg03274456	11	62273116	AHNAK		0.111962	0.626402	0.124745	0.00133287	0.0345425
cg13282971	11	62309364	AHNAK	chr11:62313282-62314314	0.675144	0.419223	0.206899	0.00157485	0.0382827
cg21038682	11	62314820	AHNAK	chr11:62314761-62315054	0.616695	0.157129	0.0804473	6.9515e-05	0.00455687
cg22134923	11	62314874	AHNAK	chr11:62314761-62315054	0.637567	0.188025	0.262931	0.000638386	0.0216854
cg20518446	11	62315034	AHNAK	chr11:62314761-62315054	0.833498	0.328029	0.234725	0.000239521	0.0110737
cg19764555	11	62315119	AHNAK	chr11:62313282-62314314	0.39493	0.0709421	0.103663	0.000315997	0.0135196
cg23447569	11	62315320	AHNAK	chr11:62313282-62314314	0.766505	0.0597049	0.178071	1.84277e-07	5.18898e-05
cg05376485	14	105442241	AHNAK2	chr14:105444319-105445225	0.445965	0.749113	0.388805	0.000240573	0.0110998
cg26082174	14	105444897	AHNAK2	chr14:105444319-105445225	0.0173106	0.0267754	0.016626	0.000539247	0.0194742
cg21868779	14	105444910	AHNAK2	chr14:105444319-105445225	0.0260765	0.0911326	0.0249066	0.000956766	0.0280126
cg13404472	5	317840	AHRR	chr5:320788-323010	0.820533	0.898418	0.846693	0.000761654	0.0242853
cg17472786	5	389355	AHRR		0.582332	0.184412	0.456562	0.00096816	0.0282421
cg05601199	5	389490	AHRR		0.969289	0.458561	0.939446	9.48155e-05	0.00572072
cg12251573	5	421644	AHRR	chr5:421224-421751	0.716103	0.314023	0.528024	0.00015129	0.00798844
cg10720080	3	186330699	AHSG		0.885748	0.274955	0.337238	6.31799e-07	0.000134845
cg18775247	12	8760905	AICDA	chr12:8757750-8758079	0.281181	0.247496	0.77677	0.000927898	0.0274887
cg24211388	6	31582837	AIF1		0.862786	0.503963	0.830495	0.00197456	0.0438058
cg11560627	10	71888428	AIFM2	chr10:71892092-71892802	0.858143	0.584053	0.83832	0.00233067	0.0483568
cg17446739	10	71892768	AIFM2	chr10:71892092-71892802	0.0783752	0.250424	0.0561558	0.00238575	0.0490161
cg08824384	6	143479386	AIG1		0.517337	0.112804	0.340046	0.00172978	0.0404977
cg02283949	6	143544445	AIG1		0.895709	0.480707	0.83955	2.01412e-07	5.57018e-05
cg00974935	6	106959535	AIM1	chr6:106959764-106960985	0.0536907	0.356016	0.048901	0.000925487	0.0274389
cg18405900	6	106959549	AIM1	chr6:106959764-106960985	0.0351721	0.389911	0.0351783	0.000632622	0.0215687
cg19343088	6	106959551	AIM1	chr6:106959764-106960985	0.0223374	0.42478	0.0239677	0.000586552	0.0205747
cg06025938	6	106959592	AIM1	chr6:106959764-106960985	0.0141668	0.38726	0.0139963	0.000499471	0.0185268
cg12448860	6	106959601	AIM1	chr6:106959764-106960985	0.0406375	0.443705	0.0389449	0.000615897	0.0212487
cg25263140	6	106959651	AIM1	chr6:106959764-106960985	0.0378803	0.341475	0.028022	0.000689742	0.0227642
cg16202624	6	106960970	AIM1	chr6:106959764-106960985	0.685269	0.130792	0.376316	0.000109634	0.00634425
cg14426428	6	106961936	AIM1	chr6:106959764-106960985	0.817484	0.0763369	0.436074	1.58289e-06	0.000272392
cg24015814	4	107258035	AIMP1		0.845115	0.700681	0.196385	8.92582e-09	4.9569e-06
cg18163118	11	67250585	AIP	chr11:67250344-67250864	0.0207437	0.0335898	0.0226671	0.00173762	0.0406076
cg26966245	17	6337223	AIPL1		0.967143	0.970793	0.959965	0.000395911	0.0158233
cg11835068	1	4714974	AJAP1	chr1:4713989-4716555	0.0323915	0.0576529	0.0280666	0.000146711	0.00782999
cg10222674	1	4837122	AJAP1		0.925411	0.835515	0.926811	0.000610507	0.0211244
cg26524552	1	65616297	AK3L1	chr1:65613041-65614898	0.805172	0.198792	0.757794	1.01908e-07	3.31021e-05
cg10716862	1	65674876	AK3L1		0.506683	0.856982	0.555412	0.00145473	0.0363726
cg25951811	14	96858416	AK7	chr14:96857611-96858125	0.043984	0.070615	0.0485947	0.000597491	0.0208328
cg09423181	17	55164762	AKAP1	chr17:55162173-55163908	0.813118	0.94361	0.455808	4.31823e-05	0.00323457
cg08754294	17	55175274	AKAP1		0.661106	0.873749	0.470847	0.000176814	0.00893743
cg16690876	17	19845638	AKAP10		0.725946	0.164251	0.363512	2.08907e-08	9.67659e-06
cg03439687	13	42894507	AKAP11		0.852976	0.484192	0.837346	9.66324e-06	0.0010684
cg22942200	6	151560992	AKAP12	chr6:151560766-151560993	0.275365	0.749563	0.145992	0.0019968	0.0440562
cg13033898	6	151561055	AKAP12	chr6:151561283-151562550	0.154764	0.673173	0.0529793	0.000577884	0.0203762
cg03609148	6	151562634	AKAP12	chr6:151560766-151560993	0.0354608	0.0573414	0.0332265	5.51379e-05	0.00384825
cg18144247	6	151576127	AKAP12		0.826258	0.679763	0.80266	8.40186e-05	0.00523518
cg20424065	6	151673357	AKAP12		0.920008	0.687289	0.915203	0.00194568	0.0434427
cg25950769	15	85945991	AKAP13		0.802759	0.877725	0.503182	0.000121951	0.00684797
cg14508021	15	85987419	AKAP13		0.179594	0.708247	0.345107	0.000193271	0.00950428
cg26482757	15	85999002	AKAP13		0.902228	0.912039	0.610797	0.000763271	0.0243206
cg13263323	15	86062960	AKAP13		0.924416	0.939884	0.748846	5.0062e-05	0.00359667
cg10653465	15	86125255	AKAP13		0.537994	0.0549965	0.134186	1.18483e-05	0.00124313
cg26675336	15	86133334	AKAP13		0.699848	0.0839732	0.202686	1.23662e-06	0.000225282
cg06318274	15	86150813	AKAP13		0.414774	0.101319	0.104757	0.00108999	0.0304418
cg00691586	15	86160762	AKAP13		0.831024	0.872986	0.517617	0.000795214	0.0249526
cg10359332	14	32835247	AKAP6		0.731776	0.835799	0.575622	2.18324e-05	0.00195139
cg02473889	19	15483990	AKAP8	chr19:15483626-15484144	0.886388	0.542336	0.881204	3.0371e-11	4.88271e-08
cg15212942	19	15487840	AKAP8	chr19:15489856-15491258	0.865433	0.901098	0.867295	0.00053876	0.01946
cg07109430	1	109400118	AKNAD1		0.904849	0.604154	0.903899	0.00174992	0.0407822
cg13909826	1	109400731	AKNAD1		0.917922	0.861225	0.914122	0.00198692	0.0439502
cg16903269	7	134250389	AKR1B15		0.32346	0.105618	0.190838	0.00201163	0.0442553
cg02435427	10	5237881	AKR1C4		0.710005	0.207624	0.807864	4.20821e-06	0.000576121
cg13494428	1	19639494	AKR7A2;PQLC2	chr1:19638207-19639309	0.272467	0.58052	0.215308	0.000691038	0.022796
cg23625458	1	19600141	AKR7L	chr1:19600249-19600942	0.828305	0.586562	0.871747	0.00125914	0.0332894
cg14193097	9	116150138	ALAD		0.688816	0.159023	0.220977	5.92042e-05	0.00404728
cg15698299	3	52233019	ALAS1	chr3:52231942-52232541	0.226233	0.722218	0.30083	0.000118224	0.00669123
cg08368094	4	74286665	ALB		0.861776	0.900651	0.837252	0.00031337	0.0134577
cg03416645	3	105087206	ALCAM	chr3:105088072-105088339	0.0472	0.0310569	0.142362	0.000849217	0.0260313
cg25758137	3	105145478	ALCAM		0.788648	0.903005	0.391869	8.0454e-05	0.00507429
cg26367456	3	105149981	ALCAM		0.873284	0.929857	0.705796	0.00127903	0.0336388
cg15423944	3	105178356	ALCAM		0.890865	0.901817	0.689446	0.00214639	0.0460432
cg09025274	3	105228864	ALCAM		0.829339	0.89824	0.546356	0.00147002	0.0366441
cg19619909	15	58306464	ALDH1A2		0.543696	0.0953747	0.302248	0.000193426	0.00950965
cg06801483	12	112226133	ALDH2		0.736346	0.7048	0.434011	0.000222573	0.0104848
cg09982224	11	67775972	ALDH3B1		0.245613	0.814736	0.459247	1.22637e-06	0.000224107
cg01577760	11	67776123	ALDH3B1		0.323401	0.734172	0.775302	0.000678658	0.022537
cg18229767	11	67776576	ALDH3B1		0.358948	0.476049	0.704369	0.00188829	0.0426523
cg11490276	11	67442697	ALDH3B2		0.340514	0.159745	0.352873	0.00181285	0.0416727
cg10286983	6	24494717	ALDH5A1	chr6:24494664-24495670	0.121997	0.508098	0.0877754	0.0024438	0.0497519
cg13327078	6	24495059	ALDH5A1	chr6:24494664-24495670	0.0209274	0.0331368	0.0191191	8.43024e-08	2.87429e-05
cg08046604	6	135238772	ALDH8A1		0.790871	0.338254	0.614644	0.00174027	0.0406327
cg11567608	6	135271518	ALDH8A1		0.863166	0.428176	0.857426	0.00114852	0.0314453
cg09533063	6	135271589	ALDH8A1		0.660452	0.270555	0.5271	0.00156234	0.0380683
cg07742718	16	30064149	ALDOA	chr16:30064200-30064678	0.0797816	0.206178	0.086778	0.000465606	0.0176623
cg09283223	16	30066971	ALDOA	chr16:30064200-30064678	0.247269	0.879613	0.670834	3.4975e-06	0.000500201
cg00577167	9	104197675	ALDOB		0.822222	0.596318	0.870325	4.7804e-05	0.00347982
cg02108731	22	50297217	ALG12		0.427941	0.774388	0.866209	0.000565382	0.0200689
cg06543424	1	95535470	ALG14	chr1:95538251-95538551	0.736086	0.763472	0.483785	0.00039698	0.0158553
cg17594624	11	77813234	ALG8		0.778018	0.756094	0.61595	0.000313968	0.0134705
cg15666177	11	77851044	ALG8	chr11:77850482-77850845	0.0312922	0.0402338	0.0336185	0.000681599	0.0226056
cg05187583	11	111738138	ALG9	chr11:111741953-111742292	0.856928	0.756017	0.840548	0.00163048	0.0391112
cg17589866	2	29643465	ALK		0.77736	0.452601	0.791451	0.000564232	0.0200402
cg04804893	12	109526101	ALKBH2		0.913552	0.938617	0.914117	0.000626592	0.0214373
cg21140380	11	43938616	ALKBH3		0.81737	0.600349	0.777705	0.00235328	0.0486318
cg00933835	2	3705271	ALLC		0.795984	0.918872	0.83944	0.00170562	0.0401768
cg05977776	2	3741732	ALLC		0.818051	0.644119	0.520615	0.00132321	0.0343718
cg01959980	2	73616832	ALMS1	chr2:73612655-73613661	0.862931	0.896436	0.849774	0.000938955	0.0276971
cg18615222	17	7986121	ALOX12B	chr17:7982631-7983560	0.530984	0.418324	0.563344	0.00144504	0.0362593
cg11278311	17	4544507	ALOX15	chr17:4542715-4544934	0.059837	0.331247	0.0423646	1.23903e-07	3.80623e-05
cg06127294	10	45872735	ALOX5	chr10:45868718-45870156	0.849582	0.375012	0.484672	8.37679e-05	0.00522507
cg26848724	13	31326405	ALOX5AP		0.778279	0.30186	0.700895	0.000919251	0.0273168
cg12139617	4	113336878	ALPK1	chr4:113332941-113333323	0.457771	0.827235	0.621324	0.00135421	0.0348677
cg15783800	18	56246997	ALPK2		0.773763	0.245301	0.519471	6.51931e-05	0.00433686
cg12062270	1	21877524	ALPL		0.84974	0.41653	0.8695	0.000224828	0.0105642
cg12047425	1	21877576	ALPL		0.958408	0.751097	0.952786	0.00096756	0.028234
cg06346857	1	21877579	ALPL		0.955376	0.72148	0.944317	0.000793182	0.0248973
cg01037895	1	21877781	ALPL		0.485517	0.0925696	0.188511	0.000387926	0.0156311
cg00887112	2	202644572	ALS2	chr2:202645387-202646155	0.866414	0.0908734	0.614358	8.79788e-07	0.000172687
cg20731213	2	202486584	ALS2CR4	chr2:202483584-202483957	0.885641	0.919835	0.888453	0.00163612	0.0392007
cg08914623	11	44327572	ALX4	chr11:44327240-44327932	0.398047	0.0183324	0.0997997	0.00181823	0.0417582
cg11909526	17	33519851	AMAC1		0.272061	0.201013	0.561435	0.000202266	0.00979163
cg07358302	5	33988320	AMACR		0.934454	0.945604	0.933975	0.00212018	0.0456514
cg06630567	9	116840435	AMBP		0.478167	0.901673	0.690391	0.000980939	0.0284853
cg13003878	9	116840825	AMBP		0.467202	0.886602	0.831213	0.000122275	0.00685972
cg20709370	11	46448921	AMBRA1		0.761678	0.7707	0.500077	0.000835406	0.0257915
cg20090290	11	46543695	AMBRA1		0.851873	0.800584	0.730356	0.000884702	0.0267011
cg15304308	11	46612932	AMBRA1	chr11:46615197-46615664	0.116948	0.682858	0.0781205	9.02578e-05	0.00552398
cg05982274	12	96362197	AMDHD1		0.881789	0.911356	0.857847	0.00166373	0.0395792
cg07376232	11	118084920	AMICA1		0.600988	0.927171	0.849163	4.29317e-05	0.00322047
cg18436898	12	47471907	AMIGO2	chr12:47473177-47474120	0.279692	0.938276	0.226068	5.39435e-07	0.00011887
cg23829318	12	47471979	AMIGO2	chr12:47473177-47474120	0.282769	0.905244	0.251773	6.83565e-06	0.00082752
cg26378518	12	47472317	AMIGO2	chr12:47473177-47474120	0.252732	0.853195	0.179627	4.08386e-07	9.58724e-05
cg08135379	12	47474763	AMIGO2	chr12:47473177-47474120	0.0379269	0.615367	0.0303721	0.000778069	0.0246099
cg11936554	2	128619948	AMMECR1L	chr2:128615479-128616004	0.829182	0.88063	0.823963	0.00059467	0.020759
cg07294263	2	128641893	AMMECR1L	chr2:128642787-128644407	0.756024	0.413072	0.554169	0.000968837	0.0282578
cg09033638	2	128642357	AMMECR1L	chr2:128642787-128644407	0.481365	0.11005	0.118638	0.000129713	0.00716283
cg07435445	14	103396379	AMN	chr14:103394397-103397070	0.0334247	0.505031	0.0639271	0.00145377	0.0363675
cg09474081	11	94501387	AMOTL1	chr11:94501366-94502696	0.0272948	0.0589817	0.0260238	0.000665646	0.022261
cg18993847	11	94502349	AMOTL1	chr11:94501366-94502696	0.0432838	0.37082	0.036373	0.000849532	0.0260371
cg20493960	11	94502524	AMOTL1	chr11:94501366-94502696	0.0367941	0.425366	0.0387116	0.00212826	0.0457681
cg13392687	11	94502558	AMOTL1	chr11:94501366-94502696	0.0242957	0.358473	0.0330864	0.00198124	0.0438839
cg01872024	11	94502804	AMOTL1	chr11:94501366-94502696	0.132198	0.891838	0.266489	1.90974e-06	0.000315498
cg05130679	11	94502824	AMOTL1	chr11:94501366-94502696	0.121726	0.933208	0.422329	0.000210474	0.0100628
cg14134256	11	94502879	AMOTL1	chr11:94501366-94502696	0.219217	0.897921	0.34546	1.1951e-05	0.00125231
cg16943185	11	94503894	AMOTL1	chr11:94501366-94502696	0.43251	0.91457	0.756815	0.00123416	0.0328412
cg18010302	11	94579436	AMOTL1		0.607383	0.909677	0.784627	0.00069515	0.0228823
cg17650523	3	134093850	AMOTL2	chr3:134092257-134093741	0.0877434	0.394639	0.0826997	0.00106402	0.0299897
cg20217702	3	134094099	AMOTL2	chr3:134092257-134093741	0.150709	0.512114	0.16843	9.25753e-06	0.00103546
cg08552233	3	134094537	AMOTL2	chr3:134092257-134093741	0.585375	0.841288	0.816452	0.00111427	0.0308448
cg12590430	7	38468944	AMPH		0.916613	0.269225	0.695078	0.000176305	0.00891506
cg14085012	7	38468985	AMPH		0.929182	0.395086	0.762098	0.0020877	0.0452517
cg20554761	7	38469054	AMPH		0.886536	0.143169	0.564538	6.43262e-07	0.000136648
cg05119931	7	38469273	AMPH		0.885016	0.323051	0.723521	3.96329e-05	0.00303473
cg10351740	7	38470121	AMPH		0.854873	0.101682	0.467212	1.2405e-06	0.000225592
cg01236751	7	38492620	AMPH		0.652692	0.137036	0.479391	0.00219721	0.0466633
cg00911226	7	38580353	AMPH		0.910089	0.210894	0.558113	2.02469e-06	0.000330131
cg18015301	7	38624096	AMPH		0.90323	0.111829	0.706591	3.06063e-08	1.28384e-05
cg11010397	7	38671977	AMPH	chr7:38670439-38671008	0.925736	0.37546	0.840891	0.00148896	0.0369358
cg19431579	17	66246732	AMZ2	chr17:66243583-66244403	0.91395	0.932269	0.911648	0.00219375	0.046621
cg14495753	3	134197092	ANAPC13		0.786953	0.135292	0.688425	6.80429e-07	0.000142132
cg21882356	14	21153451	ANG;RNASE4	chr14:21152483-21152740	0.729325	0.114869	0.705135	4.38436e-06	0.000594121
cg07572927	14	21155679	ANG;RNASE4	chr14:21152483-21152740	0.647175	0.0954614	0.211257	2.23836e-07	6.05261e-05
cg16154578	14	21161297	ANG;RNASE4		0.440027	0.89501	0.882372	0.000187322	0.00930254
cg05296180	14	21161619	ANG;RNASE4		0.357226	0.827794	0.834505	1.03382e-05	0.00112408
cg18321533	14	21162163	ANG;RNASE4		0.333028	0.730498	0.825145	4.92678e-06	0.000647367
cg13662634	9	129884948	ANGPTL2;RALGPS1		0.408756	0.679692	0.366367	0.000160729	0.00834395
cg08076018	9	129885080	ANGPTL2;RALGPS1		0.408908	0.763361	0.453507	0.000402629	0.0160154
cg09427311	9	129885730	ANGPTL2;RALGPS1		0.228837	0.786155	0.283254	0.00040579	0.0160966
cg00850068	19	8428494	ANGPTL4	chr19:8428965-8429492	0.191389	0.62537	0.226196	0.00201462	0.0442951
cg01678292	8	41522873	ANK1		0.295029	0.788879	0.511773	0.000980176	0.0284748
cg17103638	8	41542140	ANK1		0.926532	0.894573	0.932436	0.000451694	0.0173048
cg14927724	8	41559608	ANK1	chr8:41559255-41559609	0.280708	0.60812	0.253797	0.00201968	0.0443552
cg27650870	8	41583136	ANK1	chr8:41583135-41583524	0.618724	0.750836	0.370762	0.000303592	0.0131734
cg15706250	8	41583321	ANK1	chr8:41583135-41583524	0.675435	0.759091	0.445844	0.00120246	0.032314
cg07759223	8	41623322	ANK1	chr8:41624555-41625380	0.706348	0.0947669	0.865233	0.000123806	0.00691862
cg17052552	8	41654404	ANK1	chr8:41654875-41655984	0.837731	0.914108	0.809936	0.0020823	0.0451654
cg27498387	8	41655789	ANK1	chr8:41654875-41655984	0.850995	0.913731	0.588998	0.00119812	0.0322414
cg00783104	8	41655894	ANK1	chr8:41654875-41655984	0.50166	0.339004	0.121812	4.95901e-05	0.0035752
cg08604534	8	41733475	ANK1	chr8:41733535-41733911	0.0416547	0.508514	0.0464188	0.00117454	0.0318453
cg25052664	8	41733652	ANK1	chr8:41733535-41733911	0.0723793	0.472385	0.0636382	0.000634956	0.0216093
cg24800880	8	41733711	ANK1	chr8:41733535-41733911	0.0451349	0.594256	0.0472375	0.000567152	0.0201042
cg02392634	8	41733831	ANK1	chr8:41733535-41733911	0.0646793	0.595113	0.100679	0.000974848	0.028389
cg15333277	8	41733931	ANK1	chr8:41733535-41733911	0.195834	0.420586	0.168703	4.58442e-05	0.00337281
cg05977053	8	41752508	ANK1	chr8:41753340-41755250	0.795741	0.149976	0.810608	2.42341e-08	1.08718e-05
cg00583328	8	41753348	ANK1	chr8:41753340-41755250	0.594145	0.0645788	0.624012	3.97158e-05	0.00303882
cg01130406	4	113739249	ANK2		0.0751825	0.383228	0.0773137	0.000420837	0.0165222
cg14712611	4	113739379	ANK2		0.0324038	0.35243	0.0336896	0.00176969	0.0410368
cg26796245	4	113970820	ANK2		0.0371892	0.293613	0.0490838	0.000492573	0.0183599
cg21356998	4	113971324	ANK2		0.099549	0.548025	0.151836	0.00144744	0.0362901
cg00026412	10	62059894	ANK3		0.438428	0.906641	0.215843	0.00109728	0.0305536
cg04768557	10	62114363	ANK3		0.785419	0.63465	0.73339	0.00164295	0.039309
cg09097748	10	62127543	ANK3		0.627848	0.90526	0.792133	0.00142042	0.0358532
cg22150335	10	62148959	ANK3		0.266153	0.87007	0.352324	9.76119e-06	0.00107635
cg14391247	10	62149329	ANK3		0.287464	0.882232	0.316573	5.52668e-06	0.000706307
cg12354377	10	62149557	ANK3		0.284026	0.888726	0.315907	2.18825e-07	5.95217e-05
cg26607103	10	62149642	ANK3		0.199042	0.897432	0.322415	3.08246e-06	0.000454856
cg10097464	15	65204370	ANKDD1A	chr15:65203730-65204392	0.15928	0.599967	0.32659	0.00142168	0.0358764
cg00958451	15	65204391	ANKDD1A	chr15:65203730-65204392	0.187212	0.471014	0.237183	0.000911	0.0271746
cg22021768	15	65250675	ANKDD1A		0.825962	0.816008	0.357074	2.02397e-08	9.50291e-06
cg11073381	17	54305205	ANKFN1		0.62601	0.244445	0.279155	0.00245155	0.0498288
cg20047349	17	54305680	ANKFN1		0.887111	0.85226	0.346251	8.04891e-05	0.00507495
cg03455107	17	54509207	ANKFN1		0.826254	0.499828	0.710562	0.00210279	0.0454501
cg05865834	17	4128184	ANKFY1	chr17:4125261-4125563	0.899699	0.723781	0.877322	0.000784527	0.0247228
cg01124440	5	14871443	ANKH	chr5:14871391-14871611	0.0181275	0.0147875	0.0174742	0.00126263	0.0333474
cg05815275	11	113258390	ANKK1	chr11:113258443-113258821	0.452035	0.857607	0.50388	0.00211906	0.0456346
cg14859381	11	113269843	ANKK1		0.723479	0.316061	0.695806	7.37495e-05	0.00474709
cg22023035	12	133309668	ANKLE2	chr12:133308488-133310334	0.882314	0.911334	0.874861	0.00226823	0.0475893
cg27207500	12	133317906	ANKLE2		0.913926	0.93728	0.911663	0.00227427	0.0476459
cg20178924	10	92680146	ANKRD1		0.647291	0.333786	0.307366	0.00120596	0.0323743
cg01220829	10	92681957	ANKRD1		0.745602	0.344876	0.662902	0.000677462	0.0225238
cg15855924	13	111565111	ANKRD10	chr13:111566486-111568366	0.45092	0.700395	0.0925225	0.00183395	0.0419443
cg27267258	16	89359175	ANKRD11		0.886178	0.925732	0.486609	0.000557894	0.0199109
cg09607566	16	89367323	ANKRD11		0.908212	0.66896	0.901328	5.25955e-07	0.000116393
cg07054502	16	89405478	ANKRD11	chr16:89408237-89408465	0.664821	0.246698	0.268452	7.63532e-06	0.000893513
cg26481727	16	89410474	ANKRD11	chr16:89408237-89408465	0.345585	0.809758	0.180587	9.14209e-05	0.00557008
cg09537792	16	89438892	ANKRD11	chr16:89438503-89438850	0.930538	0.486029	0.889703	1.22775e-05	0.00127521
cg09428766	4	73941755	ANKRD17		0.753755	0.247705	0.704114	0.000111773	0.00642038
cg15189790	4	73970976	ANKRD17		0.934223	0.950899	0.932341	0.00187105	0.0424276
cg02950892	10	99331344	ANKRD2	chr10:99329960-99330204	0.608916	0.264502	0.48917	0.00153726	0.0377082
cg13504105	2	97511188	ANKRD23		0.937701	0.943894	0.925802	0.00119262	0.0321519
cg18832233	18	21181042	ANKRD29		0.866216	0.912966	0.858284	0.00138467	0.0353242
cg26522239	18	21199097	ANKRD29	chr18:21199431-21199798	0.726815	0.771433	0.396069	0.00178504	0.0412677
cg27440751	18	21240207	ANKRD29	chr18:21242366-21242805	0.318348	0.517123	0.200209	0.000619481	0.0213082
cg13276570	5	10567643	ANKRD33B	chr5:10562816-10565680	0.948827	0.298037	0.906237	7.69808e-06	0.000898746
cg22143698	5	10608058	ANKRD33B		0.84105	0.302245	0.788772	1.4901e-05	0.0014736
cg16264214	5	10618486	ANKRD33B		0.967568	0.592598	0.961652	0.00143508	0.0360866
cg02117271	5	10618513	ANKRD33B		0.390183	0.161713	0.4421	0.000228036	0.0106703
cg18702998	5	10623852	ANKRD33B		0.850793	0.200694	0.752322	4.53497e-06	0.000607913
cg01446287	5	10649381	ANKRD33B	chr5:10649367-10650352	0.787558	0.331022	0.700243	0.00184058	0.0420179
cg10581071	5	10653304	ANKRD33B	chr5:10649367-10650352	0.725739	0.375661	0.664326	4.58888e-05	0.00337429
cg01089425	5	10655518	ANKRD33B		0.86465	0.460539	0.879014	0.000663175	0.0222121
cg06091475	5	79863923	ANKRD34B	chr5:79864842-79866447	0.723766	0.145756	0.641626	9.14472e-05	0.00557008
cg13859847	15	79579422	ANKRD34C	chr15:79576059-79576270	0.781302	0.311822	0.363093	1.81551e-05	0.00171183
cg17384124	2	197940256	ANKRD44		0.844405	0.8955	0.827052	0.00198902	0.0439666
cg03711802	2	198029885	ANKRD44	chr2:198029068-198029438	0.69992	0.661042	0.354816	0.000529362	0.0192415
cg18213530	8	101539163	ANKRD46		0.74246	0.811418	0.37691	0.000333892	0.0140528
cg01751800	4	77820391	ANKRD56	chr4:77818015-77819600	0.848832	0.491717	0.555881	0.000339014	0.0142177
cg25738497	6	90264564	ANKRD6		0.865406	0.383776	0.72962	0.00018375	0.00917586
cg07638857	12	99137308	ANKS1B	chr12:99139386-99139769	0.751258	0.630274	0.4067	0.000167987	0.00861574
cg12391352	12	99139768	ANKS1B	chr12:99139386-99139769	0.106008	0.916497	0.248195	0.000111059	0.00639716
cg10818833	12	99139797	ANKS1B	chr12:99139386-99139769	0.109205	0.466042	0.123692	0.000636157	0.0216404
cg21958524	12	99139867	ANKS1B	chr12:99139386-99139769	0.169542	0.788072	0.396125	2.59387e-05	0.00222627
cg14733535	12	99287793	ANKS1B	chr12:99288222-99289374	0.161028	0.68852	0.0760596	5.90373e-05	0.00404255
cg01473955	12	99287876	ANKS1B	chr12:99288222-99289374	0.0937593	0.508305	0.0804113	0.000932116	0.0275721
cg04798824	12	99640830	ANKS1B		0.851001	0.90152	0.81099	0.000707304	0.0231392
cg03966669	16	4763799	ANKS3		0.801429	0.605671	0.812003	0.000756215	0.0241535
cg08030625	16	21244898	ANKS4B		0.883854	0.100332	0.4797	1.31438e-07	3.97271e-05
cg09752011	16	21244915	ANKS4B		0.890411	0.228133	0.483055	1.13485e-07	3.54684e-05
cg26937434	16	21245151	ANKS4B		0.909281	0.64886	0.894426	0.000354062	0.0146671
cg14313748	9	101498661	ANKS6		0.816874	0.173605	0.826093	1.92459e-14	1.30359e-10
cg25019707	11	69994152	ANO1		0.293586	0.16257	0.664548	0.000473338	0.017885
cg04338871	11	70002333	ANO1	chr11:70001753-70001988	0.230253	0.127886	0.516677	0.000864195	0.026338
cg14399475	12	5672411	ANO2		0.867079	0.211225	0.660223	1.8057e-05	0.00170415
cg13205848	12	5675505	ANO2		0.875431	0.0683165	0.572555	6.26962e-05	0.00421898
cg23162479	12	5690131	ANO2		0.403938	0.144448	0.251669	0.000858093	0.0262062
cg20663432	12	5696809	ANO2		0.758594	0.0697471	0.521205	2.72951e-05	0.00230911
cg02086166	12	5775618	ANO2		0.839531	0.382668	0.786897	4.10107e-05	0.00311082
cg20246277	12	5867313	ANO2		0.892316	0.409293	0.696066	0.00177159	0.0410509
cg10610428	12	5884295	ANO2		0.580356	0.126283	0.36922	0.000139321	0.00755038
cg26213458	12	5918191	ANO2		0.733379	0.179311	0.553505	0.000727797	0.0235547
cg19660531	12	5937409	ANO2	chr12:5936876-5937085	0.759872	0.111487	0.624829	0.000467359	0.0177028
cg04574152	12	5965794	ANO2		0.829772	0.188132	0.757634	0.000181971	0.00912007
cg19180555	12	5982295	ANO2		0.777967	0.199491	0.586752	0.00148649	0.0368922
cg12512286	12	5998344	ANO2		0.914617	0.652085	0.919968	0.000580842	0.0204316
cg26828839	12	6054749	ANO2		0.0507988	0.0550044	0.13736	0.00227184	0.0476395
cg16451358	12	6056330	ANO2		0.885133	0.30183	0.793705	2.66874e-05	0.00227025
cg23363039	12	6056642	ANO2		0.837866	0.316805	0.736925	9.85923e-06	0.00108427
cg00605628	12	101413143	ANO4		0.674965	0.0635022	0.170655	5.26747e-05	0.00372096
cg20883194	12	45801769	ANO6		0.363905	0.866732	0.374739	0.00195068	0.0435036
cg27191457	15	69105133	ANP32A		0.840227	0.433098	0.692914	5.85325e-05	0.00401464
cg13042288	15	90349979	ANPEP		0.905626	0.406308	0.375343	0.000217442	0.0103172
cg19405555	15	90358483	ANPEP	chr15:90357402-90358573	0.372305	0.72376	0.117437	0.000877862	0.0265859
cg02139050	2	69374138	ANTXR1		0.691631	0.239818	0.604907	0.000797279	0.0249916
cg16346555	2	69374392	ANTXR1		0.833137	0.339294	0.675725	0.000331969	0.0139961
cg27490875	2	69418131	ANTXR1		0.494166	0.15099	0.23351	0.000502989	0.0186188
cg16190888	2	69428235	ANTXR1		0.689639	0.171038	0.448261	0.000569355	0.0201632
cg02444957	2	69440951	ANTXR1		0.678998	0.263607	0.407416	8.22228e-05	0.00515115
cg00260889	4	80869858	ANTXR2		0.89093	0.905028	0.81931	0.00135362	0.0348593
cg07934068	4	80883595	ANTXR2	chr4:80885844-80886148	0.812587	0.751813	0.526479	0.00104056	0.0295507
cg16326777	4	80885735	ANTXR2	chr4:80885844-80886148	0.71339	0.804416	0.31418	0.00229242	0.0478757
cg08611402	4	80933006	ANTXR2		0.741942	0.606356	0.344259	0.000948167	0.0278793
cg16740092	4	80977666	ANTXR2		0.90524	0.929098	0.759214	0.000122463	0.00686734
cg09962984	10	46167678	ANUBL1	chr10:46167677-46168642	0.418567	0.458305	0.401834	0.00138385	0.0353231
cg14178380	10	81931985	ANXA11		0.835578	0.576391	0.751647	0.00138631	0.0353444
cg04329351	10	81955971	ANXA11		0.692894	0.121136	0.19328	2.91077e-06	0.000436696
cg01315112	10	66586436	ANXA2P3		0.6628	0.112361	0.493957	0.000628132	0.0214678
cg00319655	4	79473327	ANXA3	chr4:79472806-79473177	0.430857	0.870331	0.356624	0.000536455	0.019395
cg22615730	2	69997225	ANXA4		0.845196	0.904521	0.816461	0.000504146	0.0186449
cg05155595	2	70008161	ANXA4		0.737498	0.276635	0.569408	0.000795909	0.0249659
cg22792910	2	70009351	ANXA4		0.676338	0.0737784	0.305712	3.98547e-05	0.0030455
cg09124415	4	122611137	ANXA5		0.916536	0.934207	0.905695	0.000936645	0.0276566
cg18643093	5	150521257	ANXA6		0.626813	0.0374925	0.540229	0.00115092	0.0314715
cg14870539	5	150530752	ANXA6		0.605261	0.200274	0.774966	0.00214618	0.0460413
cg13320146	1	150954826	ANXA9		0.820683	0.231581	0.787538	2.77744e-06	0.000420356
cg00466892	2	201635643	AOX2P		0.684954	0.937539	0.90078	0.00163052	0.0391112
cg09414708	2	201643496	AOX2P		0.83076	0.908352	0.842371	0.0015286	0.0375699
cg08380379	2	201652352	AOX2P		0.903269	0.425675	0.868122	2.26633e-09	1.68113e-06
cg05687370	4	113189960	AP1AR		0.844657	0.433013	0.697624	0.000502899	0.0186171
cg11594452	22	29778415	AP1B1		0.867825	0.350295	0.82723	1.31282e-06	0.000235224
cg02415661	19	16308183	AP1M1	chr19:16308557-16309313	0.833873	0.482536	0.211176	1.74826e-07	4.96796e-05
cg04337594	11	952928	AP2A2		0.879272	0.159971	0.291863	1.73292e-09	1.36903e-06
cg09114203	11	990566	AP2A2	chr11:993208-994006	0.922309	0.949707	0.922275	0.00195654	0.0435802
cg06494775	11	1006303	AP2A2	chr11:1007921-1008343	0.283771	0.823621	0.40038	2.47364e-05	0.00213863
cg05768047	11	1007021	AP2A2	chr11:1007921-1008343	0.167413	0.650525	0.192316	1.3866e-06	0.00024599
cg04880138	11	1007119	AP2A2	chr11:1007921-1008343	0.122639	0.834857	0.174812	8.8107e-09	4.91912e-06
cg14389139	11	1007218	AP2A2	chr11:1007921-1008343	0.396247	0.878595	0.530729	0.00122211	0.0326593
cg15908627	11	1007420	AP2A2	chr11:1007921-1008343	0.339603	0.795578	0.53008	8.04793e-05	0.00507495
cg20946044	11	1010712	AP2A2	chr11:1010479-1010753	0.959058	0.823906	0.924907	0.00166624	0.0396124
cg17751065	17	33997547	AP2B1		0.90917	0.931434	0.898687	0.00136796	0.0350784
cg05573306	3	183894763	AP2M1	chr3:183892455-183893184	0.290471	0.616039	0.210109	0.00229185	0.0478686
cg06192549	3	183894778	AP2M1	chr3:183892455-183893184	0.230116	0.661725	0.117114	0.000127135	0.0070651
cg06676563	3	183901833	AP2M1	chr3:183903386-183904495	0.67589	0.802112	0.487241	0.00105732	0.0298647
cg08976646	5	77299683	AP3B1		0.354695	0.901391	0.264633	4.29146e-05	0.00321977
cg09261902	19	2140048	AP3D1	chr19:2135931-2136164	0.59867	0.835796	0.408737	0.00105184	0.0297444
cg13680246	8	42013960	AP3M2	chr8:42009723-42011098	0.858193	0.904692	0.831748	0.00124572	0.0330467
cg00008452	12	99126269	APAF1		0.845913	0.900033	0.834221	0.00086634	0.0263801
cg13862927	9	72158091	APBA1		0.500567	0.763215	0.18876	0.000469188	0.0177584
cg13917002	9	72260688	APBA1		0.249103	0.892157	0.198441	1.38497e-07	4.12868e-05
cg24195796	15	29362669	APBA2		0.798425	0.261192	0.679902	0.000713649	0.0232691
cg03986691	4	40857415	APBB2	chr4:40858884-40859162	0.877889	0.929744	0.591044	8.22497e-06	0.000945302
cg05020685	4	40858965	APBB2	chr4:40858884-40859162	0.156905	0.651222	0.20459	0.00205807	0.0448487
cg23735712	4	40858984	APBB2	chr4:40858884-40859162	0.056911	0.635636	0.0748009	0.00119552	0.0321884
cg16364495	4	40859251	APBB2	chr4:40858884-40859162	0.100778	0.624583	0.106547	0.00144821	0.0362999
cg02379560	4	40859280	APBB2	chr4:40858884-40859162	0.128137	0.61369	0.140447	0.00202122	0.0443763
cg02650667	4	41072974	APBB2		0.849394	0.856808	0.495722	2.44819e-05	0.0021229
cg19115695	5	112041847	APC	chr5:112043079-112043917	0.7123	0.795554	0.381679	0.000276555	0.0122959
cg16451027	5	112042859	APC	chr5:112043079-112043917	0.199928	0.678324	0.170228	0.000346573	0.014446
cg01240931	5	112074043	APC		0.107677	0.560959	0.078778	0.000952806	0.0279501
cg20832320	3	49712339	APEH	chr3:49710968-49712279	0.245702	0.829314	0.259431	1.171e-08	6.14774e-06
cg19574017	15	63569834	APH1B	chr15:63569296-63570100	0.112637	0.0407049	0.0655947	0.00214794	0.0460645
cg02333667	11	34934680	APIP	chr11:34937328-34938380	0.876566	0.915958	0.887735	0.000654995	0.0220381
cg25614726	1	10490058	APITD1	chr1:10490200-10491072	0.198567	0.701178	0.279882	0.00039231	0.0157372
cg13803915	1	10490063	APITD1	chr1:10490200-10491072	0.0771609	0.430815	0.0858733	0.000205189	0.00988247
cg00074348	11	57006273	APLNR		0.729244	0.250065	0.646509	0.00171391	0.0402862
cg09571466	11	129939695	APLP2	chr11:129938936-129940798	0.0296644	0.0484827	0.0325704	0.000385611	0.015574
cg09360321	11	129939700	APLP2	chr11:129938936-129940798	0.0265476	0.0430704	0.0285851	0.000276713	0.0123003
cg19845250	11	129939713	APLP2	chr11:129938936-129940798	0.030302	0.0413302	0.0294496	0.000329066	0.0139161
cg08847885	11	129939859	APLP2	chr11:129938936-129940798	0.029807	0.0548647	0.0320351	0.00240304	0.0492132
cg22186291	11	130014056	APLP2		0.820325	0.4197	0.288037	1.68332e-05	0.0016164
cg25412310	11	130014702	APLP2		0.736848	0.767833	0.278111	0.000136477	0.00743809
cg20200605	11	116706864	APOA1	chr11:116706481-116706910	0.0470441	0.523057	0.190225	2.85838e-05	0.00238881
cg26734040	11	116708517	APOA1	chr11:116706481-116706910	0.762202	0.291131	0.25236	2.93933e-05	0.00243266
cg02157083	11	116662800	APOA5	chr11:116661034-116661410	0.750153	0.379674	0.442914	0.000929456	0.0275112
cg17548735	6	41020969	APOBEC2		0.307326	0.904767	0.558446	7.3734e-05	0.00474683
cg20579480	1	183622007	APOBEC4;RGL1		0.153831	0.659526	0.109058	2.23599e-06	0.000355604
cg05644480	19	45418020	APOC1		0.477803	0.92251	0.650657	0.0010759	0.0301747
cg17095279	17	64225346	APOH		0.774052	0.119194	0.422563	1.75762e-08	8.45408e-06
cg04006839	17	64225436	APOH		0.874346	0.105311	0.506822	1.02146e-06	0.000193983
cg16481618	17	64225731	APOH		0.424987	0.0881103	0.141535	0.000261525	0.0118171
cg14550212	22	36636492	APOL2		0.812758	0.87322	0.661881	0.00137781	0.0352359
cg21092464	22	36601522	APOL4		0.884092	0.683956	0.851504	0.000321737	0.0136961
cg20330126	22	36125053	APOL5		0.284999	0.700818	0.294746	2.82965e-05	0.00237341
cg21205978	22	36044151	APOL6		0.0493341	0.404752	0.0516854	0.00203152	0.0445245
cg09432376	22	36044226	APOL6		0.0774021	0.640834	0.106586	2.07063e-06	0.000335098
cg10567273	12	12939714	APOLD1	chr12:12939713-12940391	0.0374623	0.103138	0.0386992	0.00157975	0.0383544
cg22252462	6	31622318	APOM	chr6:31619856-31620525	0.628964	0.679026	0.401531	0.000927751	0.0274863
cg04794465	6	31622326	APOM	chr6:31619856-31620525	0.840115	0.928175	0.476226	4.95499e-07	0.000110964
cg23025244	6	31622347	APOM	chr6:31619856-31620525	0.694535	0.914334	0.230366	0.000352253	0.0146098
cg06495310	6	31622363	APOM	chr6:31619856-31620525	0.683679	0.937302	0.176722	0.000438456	0.0169784
cg21000999	21	27253974	APP		0.633306	0.206716	0.358797	4.58729e-05	0.00337373
cg11321156	21	27372396	APP		0.897651	0.909453	0.579704	0.000706229	0.0231163
cg18597421	21	27540728	APP	chr21:27541893-27543524	0.231509	0.742201	0.319105	7.31136e-05	0.00471939
cg12170649	12	105622107	APPL2		0.776367	0.846922	0.723232	0.00100877	0.0289655
cg06696963	16	88875983	APRT	chr16:88877712-88878936	0.834469	0.864944	0.810646	0.000713444	0.0232674
cg20713492	1	154293482	AQP10		0.571062	0.212046	0.369847	0.00174012	0.0406327
cg06181069	1	154293494	AQP10		0.654648	0.23747	0.443777	0.0017599	0.0409004
cg18813777	1	154297271	AQP10;ATP8B2	chr1:154298205-154298544	0.0423482	0.031737	0.0353337	0.00226273	0.04752
cg16227072	11	77320503	AQP11		0.848809	0.495344	0.834107	7.30598e-05	0.00471665
cg26328335	12	50354840	AQP5	chr12:50354839-50356163	0.337633	0.878772	0.482207	0.00206196	0.0449034
cg07327347	16	25228004	AQP8		0.777725	0.483289	0.691957	0.00231021	0.0480916
cg11577097	15	58430682	AQP9		0.39939	0.0515131	0.272295	0.0022613	0.0475043
cg13802354	4	36191938	ARAP2		0.36282	0.817796	0.216656	0.000122103	0.00685358
cg00487506	8	143692935	ARC	chr8:143694430-143696166	0.870041	0.852406	0.713599	0.000728368	0.0235702
cg04206499	1	228284292	ARF1		0.848436	0.880605	0.841574	0.00161315	0.0388548
cg22708233	11	47198576	ARFGAP2	chr11:47198027-47198885	0.285235	0.345347	0.240867	0.00113237	0.0311332
cg24210884	3	121286563	ARGFX		0.863754	0.517387	0.789305	0.00100125	0.028867
cg01551258	17	30479187	ARGFXP2;RHOT1		0.760386	0.452856	0.42972	0.000640655	0.0217362
cg24116965	4	148654701	ARHGAP10	chr4:148652848-148653918	0.584926	0.899723	0.375442	0.00135569	0.0348805
cg05573550	4	148890890	ARHGAP10		0.218869	0.789053	0.411745	9.07469e-06	0.00102081
cg17056048	2	144271431	ARHGAP15		0.737939	0.221411	0.381975	0.00030539	0.0132181
cg07409629	2	144282743	ARHGAP15		0.850288	0.360696	0.677457	0.00128278	0.0337057
cg07211155	2	144359756	ARHGAP15		0.646075	0.099423	0.458606	0.00157604	0.0382958
cg27492839	2	144519856	ARHGAP15		0.849647	0.44825	0.816348	1.11563e-05	0.00119059
cg27145042	16	25026956	ARHGAP17	chr16:25026067-25026538	0.0712936	0.295153	0.0644434	0.00242692	0.0495338
cg26578621	11	110583377	ARHGAP20	chr11:110581839-110583883	0.0113852	0.0116706	0.0228545	0.000618844	0.0212959
cg17282060	10	49658320	ARHGAP22	chr10:49658224-49659201	0.975498	0.937286	0.928069	0.00160415	0.0387084
cg01298683	10	49691166	ARHGAP22	chr10:49687661-49687870	0.871194	0.564518	0.672766	5.41455e-06	0.000694972
cg10988324	10	49730753	ARHGAP22	chr10:49731448-49732638	0.874022	0.896502	0.806079	0.00121895	0.032598
cg10195050	10	49743842	ARHGAP22		0.878465	0.379709	0.664488	0.000191784	0.00945702
cg27006721	10	49760566	ARHGAP22		0.286786	0.103694	0.192275	0.00176696	0.0409873
cg12161982	10	49802919	ARHGAP22		0.816769	0.502285	0.532319	0.000914475	0.0272395
cg00994583	17	36613498	ARHGAP23	chr17:36609705-36610320	0.831705	0.734241	0.841727	0.0024007	0.0491899
cg02394698	4	86594376	ARHGAP24		0.843655	0.113074	0.473938	2.39204e-06	0.000375649
ch.4.1662577R	4	86706228	ARHGAP24		0.0770745	0.0406308	0.0496862	0.00127309	0.0335209
cg13485533	4	86850721	ARHGAP24		0.827447	0.107762	0.260309	1.55653e-12	4.46612e-09
cg10967430	4	86852666	ARHGAP24		0.869667	0.366427	0.834768	7.10575e-07	0.000147017
cg10668121	2	68968418	ARHGAP25		0.855397	0.55987	0.888426	0.000746704	0.0239571
cg23817627	2	69043460	ARHGAP25		0.836503	0.163174	0.305099	4.21135e-10	4.29066e-07
cg11366683	5	142189566	ARHGAP26		0.894482	0.652459	0.836767	0.000147273	0.00784855
cg02291619	5	142203736	ARHGAP26		0.588203	0.811085	0.348171	0.00209927	0.0454166
cg07618462	5	142499847	ARHGAP26		0.646711	0.888484	0.244435	4.35282e-07	0.000100925
cg05185926	5	142602110	ARHGAP26		0.201592	0.161173	0.626532	3.55428e-05	0.00279297
cg26523649	22	45182193	ARHGAP8;PRR5-ARHGAP8	chr22:45182016-45182223	0.836737	0.284699	0.654478	9.90961e-05	0.00590484
cg22395573	17	79830134	ARHGDIA	chr17:79828636-79830135	0.0345774	0.159383	0.0313067	5.2232e-05	0.00369791
cg23919433	17	79830196	ARHGDIA	chr17:79828636-79830135	0.0273076	0.356868	0.0429457	0.00103686	0.02947
cg05194864	12	15100977	ARHGDIB		0.841965	0.0814018	0.703522	2.58299e-07	6.76318e-05
cg16447794	16	331207	ARHGDIG	chr16:332514-332760	0.298171	0.737066	0.324823	7.48943e-05	0.00480281
cg15414698	8	1783267	ARHGEF10	chr8:1779620-1779821	0.803142	0.758714	0.593996	0.000108309	0.00628257
cg24556080	8	1787150	ARHGEF10		0.861658	0.895585	0.846501	0.000920424	0.027332
cg10223561	8	1788805	ARHGEF10		0.859776	0.730872	0.755416	0.00205238	0.0447936
cg17458053	8	1789267	ARHGEF10		0.874086	0.828111	0.692772	0.00193024	0.0432288
cg14336665	8	1789463	ARHGEF10		0.820359	0.7278	0.554635	0.00157839	0.0383326
cg04887836	8	1796676	ARHGEF10	chr8:1797406-1798775	0.897271	0.911649	0.832391	6.49073e-05	0.00432341
cg07279631	8	1801072	ARHGEF10	chr8:1797406-1798775	0.80875	0.841082	0.691227	7.20813e-05	0.0046754
cg21967789	8	1809425	ARHGEF10		0.356583	0.813642	0.592248	0.000569275	0.0201631
cg16294168	8	1810433	ARHGEF10		0.814036	0.874437	0.702555	0.00175268	0.040825
cg11047382	8	1812614	ARHGEF10		0.898087	0.852282	0.739518	0.00211204	0.0455537
cg05178234	8	1813992	ARHGEF10		0.879588	0.820935	0.737225	0.000988036	0.0286218
cg20612486	8	1814096	ARHGEF10		0.925167	0.919505	0.854803	0.00120806	0.0324048
cg00936442	8	1815101	ARHGEF10		0.898723	0.892802	0.599774	0.00151403	0.0373321
cg08753841	8	1815153	ARHGEF10		0.81555	0.84847	0.686114	0.000863931	0.0263319
cg07509167	8	1822568	ARHGEF10	chr8:1821602-1821914	0.937575	0.914118	0.838817	0.0015774	0.0383154
cg08980014	8	1824904	ARHGEF10	chr8:1821602-1821914	0.865256	0.851407	0.676323	0.000348011	0.0144921
cg26772538	8	1824939	ARHGEF10	chr8:1821602-1821914	0.893409	0.84895	0.708003	0.000851707	0.0260805
cg23204612	8	1826088	ARHGEF10		0.935404	0.91508	0.855248	0.000478971	0.0180367
cg24504942	8	1828573	ARHGEF10	chr8:1830748-1831008	0.909538	0.936075	0.86204	3.31131e-05	0.00265506
cg18511558	8	1830065	ARHGEF10	chr8:1830748-1831008	0.841949	0.781228	0.430641	0.000116282	0.00660682
cg07428430	8	1830352	ARHGEF10	chr8:1830748-1831008	0.943906	0.87972	0.615222	0.00132859	0.0344692
cg01291398	8	1830682	ARHGEF10	chr8:1830748-1831008	0.821406	0.624461	0.52828	0.00021311	0.0101561
cg16064261	8	1830749	ARHGEF10	chr8:1830748-1831008	0.867006	0.796514	0.497361	0.000180708	0.00907221
cg22934237	8	1830866	ARHGEF10	chr8:1830748-1831008	0.830865	0.8306	0.64261	4.82381e-05	0.00350056
cg21760381	8	1830965	ARHGEF10	chr8:1830748-1831008	0.934599	0.88728	0.670151	0.000199258	0.00969185
cg11087042	8	1842659	ARHGEF10		0.91565	0.872983	0.609707	0.000473903	0.0178997
cg03705571	8	1845444	ARHGEF10		0.787395	0.778673	0.444023	1.85942e-05	0.00173934
cg15956049	8	1850864	ARHGEF10		0.950093	0.948854	0.867894	0.000220063	0.0104073
cg10443978	8	1854947	ARHGEF10		0.908403	0.889647	0.719955	0.000658291	0.0220986
cg27392040	8	1857177	ARHGEF10		0.914033	0.921345	0.855659	0.0016971	0.0400541
cg24886831	8	1857688	ARHGEF10		0.815164	0.724865	0.422835	0.00040614	0.0160997
cg17491300	8	1862499	ARHGEF10		0.930526	0.937835	0.885618	0.0014612	0.0364838
cg22629762	8	1864390	ARHGEF10		0.893426	0.873305	0.754473	4.49871e-05	0.00332813
cg00639143	8	1879639	ARHGEF10		0.863905	0.862209	0.785819	0.00014659	0.00782828
cg23780635	8	1880114	ARHGEF10		0.659376	0.11227	0.242695	8.23193e-09	4.65285e-06
cg23354307	8	1885189	ARHGEF10		0.911332	0.862173	0.81572	0.00195948	0.0436102
cg26500804	8	1885244	ARHGEF10		0.855038	0.809353	0.685609	0.000553102	0.0198014
cg08544606	8	1891006	ARHGEF10	chr8:1892235-1892447	0.921261	0.918398	0.830868	0.00109205	0.0304684
cg17010522	8	1893977	ARHGEF10	chr8:1893696-1894083	0.764902	0.739053	0.523525	0.00214052	0.0459506
cg10513862	1	17906056	ARHGEF10L		0.893793	0.837869	0.416671	6.50131e-07	0.000137753
cg09854011	1	17907024	ARHGEF10L		0.816773	0.10912	0.250665	1.94607e-11	3.42158e-08
cg13788381	1	17907265	ARHGEF10L		0.804437	0.112634	0.229184	6.69894e-09	4.04004e-06
cg04894027	1	17951184	ARHGEF10L	chr1:17949452-17949670	0.757217	0.839262	0.716641	3.96607e-05	0.00303573
cg07093748	1	17996881	ARHGEF10L		0.696707	0.205246	0.599608	5.54878e-05	0.00386289
cg02289752	1	17998265	ARHGEF10L		0.539289	0.265786	0.27514	0.000497663	0.0184846
cg00172227	1	18006887	ARHGEF10L		0.829131	0.732626	0.612828	0.000855068	0.0261399
cg06767612	11	120341166	ARHGEF12		0.741555	0.882886	0.823319	0.00120471	0.03235
cg11143876	1	3376815	ARHGEF16		0.620892	0.311801	0.450865	0.00160021	0.0386557
cg00571809	1	3397113	ARHGEF16	chr1:3394701-3395191	0.942229	0.674163	0.675911	0.000364335	0.0149667
cg24036039	1	3397125	ARHGEF16	chr1:3394701-3395191	0.837073	0.457879	0.466092	1.46061e-06	0.000255716
cg02391615	11	73061896	ARHGEF17		0.444577	0.180863	0.278739	5.56693e-05	0.00387161
cg26756396	19	7459296	ARHGEF18	chr19:7459779-7460376	0.0994199	0.296609	0.0892454	0.00122939	0.0327881
cg15171226	19	7501693	ARHGEF18	chr19:7504923-7505186	0.800957	0.870055	0.742681	0.00178527	0.0412706
cg14318734	19	7504667	ARHGEF18	chr19:7504923-7505186	0.825694	0.880014	0.812259	7.61099e-05	0.00486654
cg01335785	19	7505029	ARHGEF18	chr19:7504923-7505186	0.969219	0.974144	0.964856	0.00203855	0.0446255
cg06365898	1	16533907	ARHGEF19	chr1:16532917-16534580	0.236027	0.549813	0.224335	0.000772565	0.0245165
cg20430773	1	16534157	ARHGEF19	chr1:16532917-16534580	0.667164	0.870838	0.354577	0.000536607	0.0193958
cg12325605	3	56810151	ARHGEF3		0.303499	0.849166	0.401112	6.15636e-05	0.00416311
cg15012214	3	56810320	ARHGEF3		0.160008	0.662061	0.174588	0.00178055	0.0412099
cg05722035	3	56896467	ARHGEF3		0.704864	0.829315	0.367476	0.000874285	0.026532
cg23350747	13	111774082	ARHGEF7		0.261333	0.698673	0.298634	0.00223282	0.0471457
cg14393566	13	111774127	ARHGEF7		0.296835	0.770937	0.260834	0.000540316	0.0194974
cg27485596	13	111829530	ARHGEF7		0.0863253	0.649988	0.138384	3.45306e-05	0.00273633
cg12311529	13	111944449	ARHGEF7		0.903931	0.867127	0.892776	0.00148896	0.0369358
cg04606397	6	157129618	ARID1B		0.202403	0.725835	0.158741	0.000132567	0.00727694
cg07107055	6	157410776	ARID1B		0.498431	0.21143	0.300696	0.00039216	0.0157327
cg14987175	6	157417829	ARID1B		0.623427	0.199183	0.430454	0.000154205	0.00809641
cg17475813	6	157430527	ARID1B		0.569284	0.916647	0.480178	0.00208677	0.0452386
cg06012428	6	157477204	ARID1B		0.49249	0.868112	0.799747	0.00227467	0.0476494
cg23192604	12	46151535	ARID2		0.852821	0.376991	0.766005	1.24124e-05	0.0012847
cg14659678	12	46243365	ARID2		0.909487	0.572563	0.720247	0.00176679	0.0409873
cg10617091	12	46273255	ARID2		0.69268	0.825539	0.657667	0.00107235	0.0301142
cg26539232	19	924834	ARID3A	chr19:924788-925001	0.0546096	0.329057	0.0571044	0.00220115	0.0467047
cg25298189	19	935259	ARID3A	chr19:932598-932845	0.462369	0.0792491	0.162162	0.000877295	0.0265859
cg00638992	15	74880160	ARID3B		0.927563	0.944264	0.930987	0.00204163	0.0446552
cg13344587	10	63723919	ARID5B		0.171762	0.0969193	0.0970641	0.000235966	0.0109521
cg18522931	10	63776828	ARID5B		0.761074	0.881502	0.292725	6.48756e-06	0.000798244
cg18547838	10	63800880	ARID5B		0.806603	0.87008	0.542959	0.00084287	0.0259214
cg16900910	15	72789182	ARIH1		0.851099	0.70801	0.840697	0.0017268	0.0404738
cg10845391	5	175799756	ARL10		0.77245	0.112314	0.691697	7.49628e-06	0.000881807
cg26369444	5	53555964	ARL15		0.869335	0.915848	0.86046	0.00193924	0.0433715
cg21467371	17	79648722	ARL16	chr17:79650194-79651447	0.164533	0.723759	0.35485	0.000547638	0.0196672
cg05204104	2	235403141	ARL4C	chr2:235404502-235406541	0.366288	0.90765	0.855353	0.00132978	0.0344882
cg24705818	10	18964128	ARL5B		0.850347	0.531609	0.729067	0.000896782	0.0269162
cg04642300	6	109288592	ARMC2		0.791398	0.830267	0.28142	7.44154e-06	0.000877222
cg09604569	2	232161891	ARMC9		0.782734	0.255128	0.518031	5.09346e-05	0.00363872
cg19750321	1	150808973	ARNT		0.656463	0.0858797	0.250519	2.54175e-06	0.000393183
cg08942191	15	80729093	ARNT2		0.833242	0.2371	0.700146	0.000934154	0.0276127
cg08371852	15	80878744	ARNT2		0.854331	0.10597	0.817365	5.02061e-10	4.95082e-07
cg13710814	12	27509134	ARNTL2		0.871622	0.943119	0.45605	2.39508e-06	0.000375983
cg07133729	7	98977840	ARPC1B		0.476012	0.135791	0.3195	0.00123227	0.0328162
cg10910637	3	9833936	ARPC4;TADA3	chr3:9833992-9834985	0.0489873	0.0924761	0.0428547	0.00195227	0.0435186
cg24436462	1	183595745	ARPC5		0.797555	0.390595	0.43008	0.000241039	0.0111189
cg09866743	3	35706038	ARPP-21		0.0427745	0.469719	0.043548	0.000837572	0.0258199
cg15571561	3	35706161	ARPP-21		0.157133	0.620616	0.129796	0.00141429	0.0357577
cg15459537	3	35730993	ARPP-21		0.809519	0.391279	0.516002	0.000638971	0.0216951
cg16468417	3	35835606	ARPP-21		0.174393	0.611979	0.103247	1.47037e-07	4.33017e-05
cg22110267	11	75052065	ARRB1		0.713678	0.217365	0.700888	1.13396e-05	0.00120536
cg15712777	5	78204392	ARSB		0.0583318	0.546333	0.098067	0.000131202	0.00722812
cg14778914	17	66289482	ARSG	chr17:66286541-66288532	0.813191	0.904676	0.82016	0.00122244	0.0326638
cg10941067	5	149677639	ARSI	chr5:149676978-149677751	0.726482	0.389248	0.741213	0.00109175	0.0304643
cg08659785	4	76931643	ART3		0.767865	0.596085	0.756461	0.000852193	0.0260896
cg25799590	4	76943062	ART3;CXCL10		0.749481	0.195955	0.736516	0.000130311	0.00718938
cg23884076	4	76945449	ART3;CXCL10		0.654703	0.0634872	0.534592	0.000192887	0.00948945
cg14855841	4	76945459	ART3;CXCL10		0.771619	0.14914	0.641885	5.1729e-06	0.000670847
cg18402991	4	76958054	ART3;CXCL11		0.880571	0.507096	0.873595	6.29237e-08	2.29467e-05
cg24176760	4	76958061	ART3;CXCL11		0.896944	0.518089	0.869469	0.000462198	0.0175669
cg26614815	12	14996776	ART4		0.864903	0.438173	0.878854	0.000129266	0.00714603
cg13246856	1	44399776	ARTN	chr1:44401757-44402423	0.244436	0.824398	0.391087	2.15417e-06	0.0003449
cg16996266	1	44400868	ARTN	chr1:44401757-44402423	0.748832	0.892566	0.8489	0.00225186	0.0473709
cg00610205	8	17914907	ASAH1		0.858097	0.406986	0.877204	0.000116598	0.00662026
cg05928849	11	122993208	ASAM		0.660292	0.194478	0.669889	0.000180099	0.00905372
cg25527732	11	123037886	ASAM		0.781827	0.809925	0.401383	0.000322207	0.0137048
cg05189804	11	123065246	ASAM	chr11:123065426-123066184	0.681174	0.724712	0.386523	0.00219326	0.046621
cg19096475	11	123066529	ASAM	chr11:123066517-123066986	0.475405	0.816391	0.188143	0.000697645	0.0229272
cg02184673	11	123066560	ASAM	chr11:123066517-123066986	0.482339	0.953372	0.0622767	0.00217453	0.0464017
cg19457763	11	123066693	ASAM	chr11:123066517-123066986	0.504637	0.882253	0.128756	0.000403613	0.0160365
cg26819695	11	123066956	ASAM	chr11:123066517-123066986	0.547835	0.898727	0.227006	0.002121	0.0456568
cg00162859	8	131268256	ASAP1		0.841592	0.85531	0.544442	0.000915153	0.0272499
cg24841310	8	131316336	ASAP1		0.664526	0.776497	0.593903	0.000103004	0.00606297
cg07710391	8	131337826	ASAP1		0.794357	0.869035	0.762706	0.000458551	0.0174797
cg00077877	8	131414474	ASAP1		0.138177	0.437897	0.206619	0.00101063	0.0289959
cg03295852	8	131308988	ASAP1;ASAP1IT1		0.794027	0.497891	0.733489	0.000788384	0.0247976
cg19991899	2	9347943	ASAP2	chr2:9346383-9347944	0.317741	0.044075	0.0447285	0.0018002	0.0414557
cg01155190	2	9347973	ASAP2	chr2:9346383-9347944	0.291087	0.0630822	0.055136	0.00109659	0.0305452
cg17746316	2	9401362	ASAP2		0.849962	0.914879	0.839354	0.00236351	0.0487614
cg15362557	2	9496288	ASAP2		0.835012	0.879461	0.770126	5.10891e-05	0.00364268
cg01259423	2	9533573	ASAP2	chr2:9533572-9533807	0.887687	0.902587	0.822951	0.00168677	0.0399114
cg21785832	2	9533680	ASAP2	chr2:9533572-9533807	0.875166	0.859485	0.795693	0.00134884	0.0348086
cg27447006	1	23763279	ASAP3	chr1:23763154-23763971	0.33466	0.873811	0.572399	0.000998687	0.028824
cg13183780	1	23809682	ASAP3	chr1:23809977-23810693	0.522137	0.704252	0.291477	0.00178308	0.0412454
cg21360975	2	239334433	ASB1	chr2:239335160-239336263	0.405185	0.917735	0.571001	0.00246062	0.0499148
cg22751264	10	5693432	ASB13		0.819949	0.933201	0.456826	1.36021e-05	0.00137477
cg18791048	2	237120150	ASB18	chr2:237119978-237120257	0.903939	0.63457	0.894201	0.00154785	0.0378803
cg09243445	2	237123016	ASB18	chr2:237123015-237123572	0.562304	0.273926	0.241915	0.000683444	0.0226522
cg21300993	2	237123218	ASB18	chr2:237123015-237123572	0.584115	0.24662	0.141615	5.97115e-05	0.00407387
cg23051411	2	237123571	ASB18	chr2:237123015-237123572	0.90962	0.45039	0.877249	0.00166282	0.039571
cg18552983	2	237128101	ASB18		0.893031	0.442225	0.795369	1.89734e-06	0.000314202
cg10244525	2	237146748	ASB18	chr2:237145613-237146576	0.739764	0.351318	0.719053	2.29784e-05	0.00202563
cg05685483	2	237172796	ASB18		0.859389	0.318591	0.512377	0.000700606	0.0229887
cg02317832	2	237172964	ASB18		0.703919	0.151415	0.212483	0.000417552	0.0164339
cg18845375	2	237173852	ASB18		0.814225	0.409157	0.740097	0.00233379	0.048407
cg10519093	7	95133053	ASB4		0.219808	0.805156	0.179379	6.4279e-06	0.000792555
cg27637842	4	177135995	ASB5		0.861691	0.38435	0.675853	0.000684572	0.0226683
cg24497713	4	177163167	ASB5		0.89729	0.200954	0.577488	6.63806e-06	0.000812167
cg19432505	4	177190237	ASB5		0.918426	0.609107	0.90448	0.000439633	0.017011
cg12182525	4	177190321	ASB5		0.904783	0.479385	0.740686	0.000317409	0.013565
cg06285475	10	73885299	ASCC1		0.877647	0.667596	0.885504	4.10643e-05	0.00311374
cg10672201	12	103353320	ASCL1	chr12:103351579-103352695	0.0921509	0.579116	0.256256	0.000857702	0.0262005
cg04610718	12	103353362	ASCL1	chr12:103351579-103352695	0.0501262	0.579724	0.1583	0.000315201	0.0135004
cg05309948	11	2292447	ASCL2	chr11:2290104-2292932	0.0368382	0.407252	0.023189	0.0021545	0.0461499
cg13330341	11	2292625	ASCL2	chr11:2290104-2292932	0.0369977	0.475685	0.0372065	0.00172617	0.0404635
cg06347739	11	2292636	ASCL2	chr11:2290104-2292932	0.0265705	0.503085	0.0342351	0.00165938	0.0395328
cg14308479	11	2292677	ASCL2	chr11:2290104-2292932	0.0507675	0.531624	0.170601	0.00142746	0.0359619
cg07333715	11	2292691	ASCL2	chr11:2290104-2292932	0.174942	0.941463	0.435062	0.000826362	0.0256043
cg01156550	11	2292751	ASCL2	chr11:2290104-2292932	0.389081	0.860554	0.684621	0.000174251	0.00883607
cg26051413	11	2292902	ASCL2	chr11:2290104-2292932	0.375201	0.951326	0.870203	0.00100018	0.0288485
cg11644479	11	2292914	ASCL2	chr11:2290104-2292932	0.500041	0.899612	0.785531	0.000955199	0.0279904
cg05068202	11	2293074	ASCL2	chr11:2290104-2292932	0.435064	0.851732	0.839652	0.00153219	0.0376338
cg04380653	11	2293164	ASCL2	chr11:2290104-2292932	0.458003	0.909869	0.836031	0.00079228	0.0248766
cg07525299	11	2293171	ASCL2	chr11:2290104-2292932	0.290493	0.886139	0.749084	6.10762e-06	0.000762855
cg09394785	11	2293211	ASCL2	chr11:2290104-2292932	0.201113	0.597616	0.453777	0.000998212	0.0288196
cg17426084	11	2293552	ASCL2	chr11:2290104-2292932	0.290331	0.693106	0.758747	0.000150572	0.00796272
cg09532575	6	119224709	ASF1A		0.832769	0.755655	0.684601	0.00187942	0.0425543
cg22007739	1	155305329	ASH1L		0.861073	0.905616	0.829469	0.00223044	0.0471098
cg24001280	8	37962134	ASH2L	chr8:37962449-37963453	0.198782	0.639215	0.169034	0.00103337	0.0294154
cg11390489	8	62568172	ASPH		0.912642	0.852076	0.909187	0.00154891	0.0378881
cg20903136	8	62575678	ASPH		0.889174	0.926234	0.883958	0.00143254	0.0360491
cg12817389	8	62602522	ASPH		0.149571	0.439655	0.110862	0.0001613	0.0083641
cg20401945	16	29912460	ASPHD1	chr16:29912896-29913203	0.545683	0.0764616	0.252276	0.000146075	0.00780885
cg05192831	16	29913007	ASPHD1	chr16:29912896-29913203	0.668614	0.247716	0.584701	0.00157326	0.0382597
cg06206626	22	26825900	ASPHD2	chr22:26824978-26825680	0.270986	0.657145	0.55486	1.37835e-05	0.00138869
cg15280188	17	79934854	ASPSCR1	chr17:79935137-79936051	0.0428954	0.348739	0.0261499	0.000314481	0.0134844
cg24392479	17	79934870	ASPSCR1	chr17:79935137-79936051	0.082034	0.40633	0.0541509	0.00134237	0.0346886
cg13597397	9	133320948	ASS1	chr9:133319864-133320810	0.463067	0.105148	0.249633	0.00162991	0.0391035
cg14529412	9	133349223	ASS1		0.381403	0.853627	0.477709	0.000468144	0.0177276
cg20323571	1	176999034	ASTN1;MIR488		0.827046	0.379392	0.773502	5.05249e-05	0.00362272
cg06443831	2	26052597	ASXL2		0.826487	0.879063	0.821251	0.00165551	0.0394746
cg19775718	7	117065034	ASZ1	chr7:117067403-117067666	0.741986	0.279773	0.375272	0.00167186	0.0396903
cg22424532	7	117067727	ASZ1	chr7:117067403-117067666	0.852494	0.39139	0.69685	8.47699e-05	0.00527165
cg20288016	10	89574331	ATAD1	chr10:89577481-89578287	0.819203	0.147553	0.644502	1.20183e-07	3.71102e-05
cg10208083	2	24146420	ATAD2B	chr2:24149256-24150354	0.824252	0.89238	0.810448	0.00155182	0.0379115
cg11856308	1	1449956	ATAD3A	chr1:1446878-1448205	0.772466	0.399361	0.781799	2.65223e-05	0.00225946
cg07478007	1	1411602	ATAD3B	chr1:1414034-1414532	0.801141	0.50986	0.812053	0.000106551	0.00620322
cg26116103	12	51157776	ATF1	chr12:51157498-51158842	0.0615795	0.16411	0.0714297	4.90075e-07	0.000110269
cg18317154	1	212738304	ATF3		0.872459	0.373879	0.691059	6.33951e-05	0.0042488
cg18174834	1	212740460	ATF3		0.135951	0.562428	0.161053	0.00160948	0.0388002
cg07139026	1	212786822	ATF3	chr1:212780151-212783086	0.853867	0.857458	0.545469	0.000618567	0.0212928
cg23782145	6	32087190	ATF6B		0.887879	0.212097	0.396352	1.54389e-08	7.59401e-06
cg18577239	12	53955664	ATF7		0.864582	0.410567	0.743665	0.000231522	0.0107955
cg17519280	5	115175001	ATG12	chr5:115177234-115178256	0.318543	0.0340096	0.0509025	0.00101667	0.0291003
cg20707601	2	242598543	ATG4B		0.909003	0.80294	0.891812	0.00171861	0.040355
cg01275632	2	242605362	ATG4B	chr2:242606078-242606560	0.623362	0.303714	0.46509	0.00222436	0.0470392
cg25428929	2	242606353	ATG4B	chr2:242606078-242606560	0.93554	0.0754338	0.778719	7.52118e-07	0.000153455
cg00977707	3	11517830	ATG7		0.858717	0.42128	0.77131	5.12657e-05	0.00365203
cg15183092	7	150710447	ATG9B;NOS3	chr7:150710349-150711333	0.165459	0.612552	0.159727	0.00074002	0.0238182
cg09253211	11	63438586	ATL3	chr11:63438301-63439314	0.0244531	0.0790667	0.024017	0.00094254	0.0277652
cg23652866	11	63438791	ATL3	chr11:63438301-63439314	0.0357713	0.101262	0.0276583	0.00114986	0.0314527
cg02177646	11	63439120	ATL3	chr11:63438301-63439314	0.287209	0.45984	0.29348	0.000749516	0.0240212
cg12320322	11	63439260	ATL3	chr11:63438301-63439314	0.0362892	0.40719	0.0243089	0.00106398	0.0299897
cg03092399	11	108149307	ATM		0.726074	0.883783	0.405344	0.00217652	0.0464219
cg14996263	12	7046277	ATN1	chr12:7046237-7047257	0.18852	0.654701	0.280549	0.00101589	0.029086
cg12077194	10	69993117	ATOH7	chr10:69990893-69991523	0.577391	0.797731	0.666051	0.00147357	0.0366905
cg23571433	2	85980782	ATOH8	chr2:85980499-85982198	0.158811	0.526189	0.063877	0.00210761	0.045509
cg07622521	2	85992622	ATOH8		0.217136	0.841649	0.549666	1.35072e-06	0.000241375
cg14141912	2	85992696	ATOH8		0.174277	0.692597	0.261797	1.04103e-05	0.00112925
cg05318142	2	85999498	ATOH8		0.0577088	0.797409	0.142248	2.18888e-08	1.00154e-05
cg08079596	2	85999628	ATOH8		0.0737751	0.582912	0.140258	6.91303e-06	0.000834443
cg07489029	15	25958878	ATP10A	chr15:25958877-25959240	0.758409	0.469542	0.832611	6.04675e-05	0.00410849
cg11442877	15	25961909	ATP10A	chr15:25958877-25959240	0.759945	0.500239	0.817902	0.000763425	0.0243218
cg13563026	4	47512538	ATP10D		0.722891	0.432683	0.74153	0.00139529	0.0354637
cg03992114	13	113343376	ATP11A	chr13:113343853-113345188	0.511771	0.920718	0.292183	1.13153e-05	0.00120374
cg23049429	13	113345944	ATP11A	chr13:113343853-113345188	0.219058	0.901717	0.117827	1.06792e-05	0.00115056
cg07610853	13	113346616	ATP11A	chr13:113343853-113345188	0.524706	0.891775	0.400586	0.00163272	0.0391527
cg11360522	13	113379828	ATP11A	chr13:113382598-113383007	0.24608	0.872899	0.367159	9.30763e-08	3.08395e-05
cg02417360	13	113398673	ATP11A		0.278024	0.799533	0.512741	0.000460754	0.0175281
cg08399404	13	113411200	ATP11A	chr13:113410004-113410362	0.60577	0.891859	0.5267	0.00147282	0.0366816
cg03356537	13	113425249	ATP11A	chr13:113424898-113425105	0.495009	0.881187	0.27232	0.00221574	0.0469241
cg21513610	13	113425621	ATP11A	chr13:113424898-113425105	0.768411	0.930056	0.424595	0.0021244	0.0457113
cg08893811	13	113426044	ATP11A	chr13:113424898-113425105	0.281784	0.674094	0.295973	0.000123812	0.00691862
cg09975219	13	113461500	ATP11A	chr13:113464191-113464413	0.470168	0.937273	0.933139	0.00233585	0.0484317
cg12511137	13	113477810	ATP11A	chr13:113474080-113474352	0.862122	0.154231	0.69864	5.65608e-07	0.000123257
cg04229372	13	113477850	ATP11A	chr13:113474080-113474352	0.928995	0.600307	0.926505	0.00119804	0.0322414
cg14904115	13	113488382	ATP11A	chr13:113486835-113487347	0.811712	0.491789	0.848493	0.00145166	0.03635
cg17226324	13	113496446	ATP11A	chr13:113497296-113497661	0.696548	0.83414	0.657674	0.000770926	0.0244849
cg19820921	3	182529148	ATP11B		0.810474	0.894919	0.821534	0.000678175	0.0225281
cg15035421	3	182631849	ATP11B		0.24748	0.878045	0.789681	2.17999e-09	1.63767e-06
cg03585795	3	182637972	ATP11B		0.852329	0.912636	0.862049	0.00117956	0.0319353
cg25411508	19	19764685	ATP13A1	chr19:19764631-19764873	0.969307	0.974563	0.96988	0.0010042	0.0289067
cg13115616	1	17338059	ATP13A2	chr1:17337829-17338590	0.112903	0.183993	0.111306	0.000493447	0.0183809
cg03592833	3	194129373	ATP13A3		0.794701	0.78775	0.480865	0.00154883	0.0378881
cg13959207	3	194188988	ATP13A3		0.787819	0.311445	0.700622	2.42725e-07	6.44525e-05
cg08889347	3	193227429	ATP13A4		0.438516	0.733427	0.162333	0.0010398	0.0295333
cg09216823	3	193272655	ATP13A4		0.854693	0.259041	0.728031	0.000761225	0.024276
cg20420826	1	116915292	ATP1A1	chr1:116915291-116916813	0.0491815	0.448163	0.0763697	0.000925453	0.0274389
cg11342277	1	116915598	ATP1A1	chr1:116915291-116916813	0.0133723	0.417557	0.0348254	0.00166933	0.0396529
cg10526817	1	160135527	ATP1A4		0.903034	0.713848	0.908265	4.3295e-06	0.000589212
cg26009832	1	169081894	ATP1B1		0.844284	0.386555	0.80554	0.000121812	0.00684273
cg20641545	12	89984390	ATP2B1		0.888763	0.737634	0.880431	1.57142e-07	4.58202e-05
cg10501629	12	90049560	ATP2B1		0.92442	0.93818	0.899111	0.00141986	0.0358524
cg24171152	12	90051243	ATP2B1		0.941809	0.954483	0.946338	0.00126035	0.0333102
cg08802607	3	10380471	ATP2B2		0.836943	0.55535	0.825398	0.000629045	0.0214855
cg00585207	3	10452954	ATP2B2		0.754185	0.324789	0.552745	0.000651811	0.0219656
cg02482042	3	10465412	ATP2B2		0.588703	0.268475	0.431973	0.00217683	0.0464238
cg24433722	1	203596190	ATP2B4	chr1:203598471-203598853	0.0258878	0.270664	0.0218038	0.00150359	0.0371493
cg03161476	1	203596940	ATP2B4	chr1:203598471-203598853	0.115557	0.754163	0.0216971	2.15365e-05	0.00193155
cg13558971	1	203597085	ATP2B4	chr1:203598471-203598853	0.126613	0.593823	0.0293065	0.00072254	0.0234332
cg27173151	1	203598330	ATP2B4	chr1:203598471-203598853	0.0632566	0.741277	0.0582165	4.4295e-12	1.03987e-08
cg04148762	1	203598573	ATP2B4	chr1:203598471-203598853	0.0262936	0.200672	0.0200204	0.000913092	0.0272116
cg15732851	1	203598761	ATP2B4	chr1:203598471-203598853	0.0281573	0.498797	0.0293776	0.00168534	0.0398913
cg21397588	1	203598954	ATP2B4	chr1:203598471-203598853	0.076365	0.685673	0.100254	2.19465e-08	1.00307e-05
cg02457623	1	203599089	ATP2B4	chr1:203598471-203598853	0.0434655	0.867186	0.027564	2.58769e-11	4.23127e-08
cg20312390	1	203626524	ATP2B4		0.753994	0.345579	0.473317	0.00199521	0.044037
cg26008650	1	203708794	ATP2B4		0.917368	0.558277	0.902716	0.000643238	0.021798
cg04305943	1	203697703	ATP2B4;SNORA77		0.800498	0.486941	0.83043	0.000102025	0.00602593
cg08448284	3	130652221	ATP2C1		0.908141	0.941644	0.885411	0.000675896	0.0224959
cg25413188	19	36054538	ATP4A		0.476967	0.764945	0.803375	0.00246372	0.0499389
cg22231620	20	57605092	ATP5E	chr20:57607045-57607782	0.626085	0.81204	0.401187	0.000104829	0.00613411
cg00032609	20	57606607	ATP5E	chr20:57607045-57607782	0.142581	0.740008	0.14965	4.27517e-07	9.94594e-05
cg12937378	20	57606993	ATP5E	chr20:57607045-57607782	0.0182153	0.515169	0.021435	7.85502e-05	0.00498236
cg03539511	20	57607061	ATP5E	chr20:57607045-57607782	0.0339287	0.542491	0.0373987	5.46897e-05	0.00382602
cg09147710	20	57607335	ATP5E	chr20:57607045-57607782	0.0794599	0.495738	0.0762614	5.13411e-05	0.00365488
cg11467262	20	57607340	ATP5E	chr20:57607045-57607782	0.113736	0.366096	0.108396	0.00132754	0.0344562
cg26831148	20	57607406	ATP5E	chr20:57607045-57607782	0.0190609	0.382963	0.0188105	0.000676004	0.0224959
cg11595749	20	57607571	ATP5E	chr20:57607045-57607782	0.0399016	0.363185	0.0375907	0.00056643	0.02009
cg11919138	20	57607692	ATP5E	chr20:57607045-57607782	0.0120142	0.33537	0.0126175	0.000689115	0.0227548
cg22997177	12	54070527	ATP5G2	chr12:54071053-54071265	0.0817575	0.320828	0.0750861	0.00172115	0.0403964
cg27479634	12	54070545	ATP5G2	chr12:54071053-54071265	0.1559	0.695904	0.198968	2.54394e-08	1.12779e-05
cg19842134	12	54070591	ATP5G2	chr12:54071053-54071265	0.100003	0.525261	0.0929638	0.000972588	0.0283384
cg02905198	12	54070610	ATP5G2	chr12:54071053-54071265	0.137066	0.647037	0.137018	0.00112393	0.0309876
cg10859192	12	54071672	ATP5G2	chr12:54069625-54070177	0.269911	0.883426	0.274864	0.00161122	0.0388288
cg06120000	16	67480229	ATP6V0D1		0.738343	0.185452	0.0908375	1.23456e-08	6.42429e-06
cg05966241	16	67515938	ATP6V0D1	chr16:67514398-67515345	0.128251	0.323111	0.14022	0.000528663	0.0192264
cg12958813	1	198509669	ATP6V1G3		0.754455	0.146432	0.533344	0.000517337	0.0189681
cg05789658	1	198510726	ATP6V1G3		0.698896	0.147373	0.572898	0.000483029	0.0181416
cg01767396	13	25959184	ATP8A2		0.800251	0.401145	0.782822	0.000499745	0.0185353
cg00465739	13	25993555	ATP8A2		0.864332	0.494304	0.861898	0.00197249	0.0437801
cg22032364	13	26112093	ATP8A2		0.777174	0.22464	0.786348	9.17588e-06	0.00102966
cg03107235	13	26586713	ATP8A2	chr13:26586287-26586761	0.686244	0.0563699	0.522487	7.25378e-05	0.00469262
cg18085435	18	55400167	ATP8B1		0.44466	0.0876086	0.208546	2.62778e-06	0.000402966
cg17488500	1	154307007	ATP8B2		0.66905	0.119291	0.289165	0.000127833	0.00709053
cg19599368	15	50180387	ATP8B4		0.534537	0.0801232	0.340852	0.00216964	0.0463349
cg21204588	15	50316779	ATP8B4		0.683579	0.286919	0.730667	0.000281005	0.0124375
cg23671196	15	50405520	ATP8B4		0.876389	0.558683	0.882335	7.47874e-06	0.000880352
cg25672097	15	50412855	ATP8B4		0.669914	0.314269	0.650412	0.0017383	0.0406168
cg16128296	18	77091251	ATP9B	chr18:77087463-77088162	0.905189	0.93452	0.875187	0.00143637	0.0361125
cg16471110	18	77133818	ATP9B	chr18:77134250-77134551	0.889287	0.698621	0.888221	0.000168326	0.00862561
cg23841763	1	47134469	ATPAF1	chr1:47133674-47134395	0.324888	0.776933	0.364799	0.000408665	0.0161781
cg24029551	15	35817614	ATPBD4		0.930798	0.741038	0.923737	5.83394e-07	0.0001264
cg23125542	11	67183148	ATPGD1	chr11:67182965-67183393	0.0141775	0.0202501	0.0124827	0.000543106	0.0195639
cg26800893	11	67184596	ATPGD1	chr11:67182965-67183393	0.174727	0.652317	0.371749	3.5477e-07	8.57207e-05
cg02693745	20	3450491	ATRN	chr20:3451291-3452231	0.923044	0.940529	0.924148	0.000734183	0.0236942
cg02479744	6	16303089	ATXN1		0.268753	0.817203	0.212818	6.71233e-05	0.00443811
cg12451671	6	16303162	ATXN1		0.277126	0.739803	0.210965	0.00022375	0.0105234
cg24209738	6	16303169	ATXN1		0.373389	0.830606	0.254712	0.00049994	0.0185408
cg26794346	6	16472305	ATXN1		0.875215	0.553496	0.758498	5.3161e-05	0.0037491
cg09132619	6	16576166	ATXN1		0.898915	0.915533	0.84023	0.00134226	0.0346886
cg24067911	6	16729610	ATXN1		0.774645	0.126507	0.181503	6.50471e-08	2.34929e-05
cg12569592	6	16753450	ATXN1		0.807211	0.435263	0.46465	0.00126193	0.0333334
cg03881351	22	46240067	ATXN10		0.788896	0.857734	0.520626	0.000143441	0.00770334
cg14411202	12	111890353	ATXN2		0.776447	0.534636	0.755069	0.00205208	0.0447936
cg19122402	12	111892971	ATXN2		0.807082	0.346155	0.721901	0.000112464	0.00645022
cg26214026	12	111926384	ATXN2		0.761862	0.094159	0.479132	1.00196e-05	0.00109724
cg07927257	12	112032692	ATXN2	chr12:112035612-112037558	0.830026	0.918625	0.662841	0.00201376	0.044286
cg12034871	14	92525005	ATXN3		0.334683	0.859337	0.193842	0.000621613	0.0213484
cg11895696	7	105283982	ATXN7L1		0.236012	0.964177	0.636215	2.83716e-05	0.00237782
cg21210285	7	105331648	ATXN7L1		0.103046	0.397818	0.05058	2.64045e-05	0.00225221
cg22661239	7	105331690	ATXN7L1		0.248545	0.786716	0.30522	0.000122696	0.00687534
cg00668619	7	105332279	ATXN7L1		0.0920195	0.535455	0.0901999	0.00189747	0.0427815
cg10345429	7	69265347	AUTS2		0.926566	0.310141	0.938087	1.82626e-10	2.16209e-07
cg15052518	7	69283201	AUTS2		0.810965	0.886922	0.826263	0.000999837	0.0288464
cg05608790	7	69427388	AUTS2		0.730711	0.302893	0.793708	0.000175954	0.00890386
cg17201273	7	69627800	AUTS2		0.815455	0.444643	0.620742	0.000611812	0.0211554
cg10527525	7	70061508	AUTS2	chr7:70060834-70061456	0.485308	0.083546	0.23014	0.000867717	0.0264057
cg17892069	7	70061616	AUTS2	chr7:70060834-70061456	0.75436	0.210193	0.51228	0.000348916	0.0145142
cg09009070	7	70165515	AUTS2		0.787926	0.360563	0.82465	0.00215612	0.0461704
cg20680265	7	70194602	AUTS2		0.721397	0.162321	0.910233	0.000341093	0.0142831
cg01898553	7	70252953	AUTS2	chr7:70254894-70255986	0.89565	0.427955	0.880887	0.0022578	0.0474525
cg08695941	12	58207676	AVIL		0.391753	0.805268	0.753099	3.88926e-07	9.20361e-05
cg10931900	12	63540400	AVPR1A	chr12:63543636-63544967	0.8141	0.280055	0.548353	5.01103e-06	0.000655409
cg23335356	12	63547716	AVPR1A	chr12:63543636-63544967	0.829033	0.179209	0.611027	2.83941e-07	7.27062e-05
cg00973118	16	374570	AXIN1	chr16:374732-375328	0.700824	0.150909	0.429665	1.36386e-06	0.000242686
cg27549619	16	374924	AXIN1	chr16:374732-375328	0.840227	0.0901814	0.51029	6.68675e-07	0.000140417
cg01045337	16	374988	AXIN1	chr16:374732-375328	0.883425	0.0259105	0.548856	4.16367e-07	9.73588e-05
cg02086790	16	375327	AXIN1	chr16:374732-375328	0.907315	0.526822	0.909381	5.05732e-06	0.000659793
cg16778107	16	381873	AXIN1		0.838432	0.445222	0.709411	0.00149111	0.0369693
cg15001381	16	403314	AXIN1		0.0279573	0.381984	0.0221724	0.000859197	0.0262377
cg08005093	17	63532898	AXIN2	chr17:63532955-63533933	0.904528	0.630756	0.896558	2.23933e-06	0.000355998
cg01974715	19	41724129	AXL		0.395643	0.753786	0.849175	0.00076516	0.0243677
cg07836225	1	235665822	B3GALNT2	chr1:235667089-235668619	0.606469	0.799937	0.163554	0.000553836	0.0198123
cg03108070	6	33245490	B3GALT4	chr6:33244677-33245554	0.17293	0.57426	0.105864	0.00215387	0.0461412
cg17200690	6	33245619	B3GALT4	chr6:33244677-33245554	0.676145	0.863024	0.46529	0.000934993	0.0276217
cg03127244	6	33245638	B3GALT4	chr6:33244677-33245554	0.732658	0.887943	0.514503	0.000980378	0.0284758
cg17103217	6	33245721	B3GALT4	chr6:33244677-33245554	0.329883	0.535035	0.234295	0.00119219	0.0321476
cg00052772	6	33245804	B3GALT4	chr6:33244677-33245554	0.584702	0.761797	0.413603	0.000669947	0.0223628
cg26055446	6	33245990	B3GALT4	chr6:33244677-33245554	0.441146	0.607024	0.267696	0.000709913	0.0231983
cg05445632	11	134282404	B3GAT1	chr11:134281380-134282919	0.0125052	0.0167901	0.0133577	0.00212041	0.0456518
cg16024904	19	17905718	B3GNT3	chr19:17905579-17906317	0.0337224	0.206648	0.0327713	0.0015851	0.0384377
cg15456115	19	17908598	B3GNT3	chr19:17905579-17906317	0.670564	0.144654	0.165401	4.05662e-06	0.000561379
cg17016266	2	232261238	B3GNT7	chr2:232262854-232263544	0.77988	0.426751	0.749352	0.000347355	0.0144749
cg06574960	2	232265084	B3GNT7	chr2:232262854-232263544	0.55243	0.0644579	0.370827	0.000336122	0.0141207
cg07366300	19	41934715	B3GNT8		0.370983	0.697794	0.678645	0.000735337	0.0237195
cg02724047	16	67185194	B3GNT9	chr16:67183208-67184968	0.125789	0.52098	0.191758	0.00242457	0.0494899
cg04437605	17	80922369	B3GNTL1	chr17:80922368-80922812	0.815241	0.853286	0.68229	9.62232e-05	0.00578117
cg22130568	17	80972336	B3GNTL1	chr17:80975646-80976250	0.861257	0.818361	0.87718	0.00203145	0.0445245
cg01826354	17	81006497	B3GNTL1	chr17:81009245-81009999	0.754799	0.444008	0.688234	0.000595965	0.0207954
cg12811157	11	368902	B4GALNT4		0.0172327	0.152392	0.0178521	0.00133764	0.0346162
cg18916019	11	368914	B4GALNT4		0.0739186	0.290954	0.0783824	7.34592e-05	0.00473651
cg05779272	9	33168018	B4GALT1	chr9:33166700-33167934	0.638859	0.833639	0.786964	0.00181863	0.0417639
cg23001650	1	44444603	B4GALT2	chr1:44444635-44445622	0.168556	0.491044	0.313177	6.88474e-06	0.000831757
cg17170190	1	44445979	B4GALT2	chr1:44444635-44445622	0.389978	0.587635	0.526459	0.00196344	0.0436758
cg20740051	1	161147718	B4GALT3	chr1:161147061-161147451	0.317545	0.821935	0.494188	0.000824968	0.0255687
cg24884140	17	19250190	B9D1	chr17:19247785-19248069	0.754678	0.190779	0.579466	0.000239243	0.0110669
cg14025053	8	104153637	BAALC;C8orf56	chr8:104152726-104153390	0.0404506	0.606171	0.0537751	0.000820048	0.025464
cg16314639	8	104153767	BAALC;C8orf56	chr8:104152726-104153390	0.216856	0.649741	0.303609	0.00232048	0.048229
cg01923020	11	117185292	BACE1	chr11:117186344-117186979	0.81097	0.252742	0.312136	1.54014e-07	4.50353e-05
cg07083481	21	30676570	BACH1		0.895808	0.907749	0.874134	0.00138194	0.0352964
cg21495156	6	90995476	BACH2		0.0887875	0.631789	0.0708791	9.48486e-05	0.00572188
cg07944798	17	79374181	BAHCC1	chr17:79366806-79374742	0.0169333	0.675162	0.0158409	1.21836e-05	0.00126937
cg16779839	17	79374327	BAHCC1	chr17:79366806-79374742	0.095133	0.939775	0.0232782	3.98266e-06	0.000553461
cg11976222	17	79374340	BAHCC1	chr17:79366806-79374742	0.123385	0.943156	0.0405524	3.60292e-05	0.00282185
cg06636541	17	79374515	BAHCC1	chr17:79366806-79374742	0.0971266	0.920595	0.0228094	6.78268e-06	0.000823124
cg01419914	17	79374691	BAHCC1	chr17:79366806-79374742	0.378599	0.898566	0.303535	0.00162576	0.0390378
cg01681525	17	79374741	BAHCC1	chr17:79366806-79374742	0.32058	0.907063	0.238063	0.000394758	0.0157955
cg01623261	17	79377850	BAHCC1	chr17:79377529-79377870	0.212022	0.747678	0.0594522	0.00207517	0.0450828
cg11031567	17	79378207	BAHCC1	chr17:79377529-79377870	0.31725	0.822008	0.106005	0.000732908	0.0236707
cg18391770	17	79390726	BAHCC1	chr17:79388434-79388927	0.197771	0.681926	0.192385	2.85806e-07	7.28489e-05
cg15431934	15	40759208	BAHD1	chr15:40763162-40764196	0.635402	0.525122	0.29867	0.000625211	0.0214096
cg06043159	8	143556871	BAI1	chr8:143556714-143556997	0.128994	0.635952	0.108358	2.65469e-08	1.16316e-05
cg20446334	17	79010458	BAIAP2	chr17:79008929-79009762	0.66524	0.140523	0.171656	0.000711462	0.0232269
cg26696870	17	79010561	BAIAP2	chr17:79008929-79009762	0.577614	0.143105	0.222342	0.00119553	0.0321884
cg26841647	17	79010968	BAIAP2	chr17:79008929-79009762	0.822033	0.272662	0.305525	2.13855e-06	0.000343411
cg12363726	17	79011542	BAIAP2	chr17:79008929-79009762	0.715881	0.208594	0.233462	9.48846e-05	0.00572238
cg11543393	17	79042967	BAIAP2	chr17:79045454-79045696	0.761808	0.588013	0.550093	2.42691e-05	0.00210926
cg20707786	17	79058303	BAIAP2		0.813681	0.276049	0.825369	2.26206e-06	0.000359196
cg02080909	17	79058333	BAIAP2		0.895271	0.137694	0.972476	6.86194e-07	0.000143096
cg09840386	17	79058751	BAIAP2		0.823403	0.190777	0.627344	4.39995e-06	0.000594766
cg01780984	17	79058859	BAIAP2		0.551784	0.1284	0.389833	0.000373798	0.0152425
cg15059474	7	97990184	BAIAP2L1		0.85865	0.899081	0.622498	0.00204395	0.0446924
cg08684580	7	98029266	BAIAP2L1	chr7:98030097-98030422	0.152709	0.728592	0.113339	0.000930316	0.0275327
cg06915202	7	98029285	BAIAP2L1	chr7:98030097-98030422	0.212167	0.919266	0.19623	7.50464e-05	0.00481033
cg27505627	22	38506589	BAIAP2L2		0.963475	0.213126	0.85459	1.4119e-05	0.00141394
cg17838773	22	38506623	BAIAP2L2		0.727242	0.121006	0.432979	7.91483e-08	2.72746e-05
cg20207973	22	38506712	BAIAP2L2		0.418268	0.0748	0.208756	0.000232319	0.0108205
cg08196512	22	38506737	BAIAP2L2		0.932721	0.092215	0.396135	2.95185e-12	7.52861e-09
cg11744966	22	38506771	BAIAP2L2		0.874971	0.148098	0.345554	7.18452e-12	1.5746e-08
cg09247692	22	38506781	BAIAP2L2		0.865176	0.0423642	0.222238	6.84326e-10	6.24166e-07
cg08949164	16	1383433	BAIAP3	chr16:1382916-1384735	0.0457084	0.345779	0.111293	0.00234468	0.0485427
cg03465061	16	1391682	BAIAP3	chr16:1392544-1392753	0.829027	0.848258	0.73729	4.43855e-05	0.00329895
cg06759097	16	1392588	BAIAP3	chr16:1392544-1392753	0.198324	0.471183	0.18718	0.000828894	0.0256596
cg07722360	20	17691454	BANF2		0.773286	0.215896	0.156292	1.55398e-09	1.24673e-06
cg23730277	4	102734752	BANK1		0.902828	0.897578	0.851584	0.000441866	0.0170657
cg26979299	16	88024061	BANP	chr16:88023156-88023583	0.809451	0.813383	0.486181	6.41001e-05	0.00428207
cg01518755	16	88066718	BANP		0.880525	0.66444	0.896661	0.00209822	0.0453963
cg14374754	9	96714295	BARX1	chr9:96713326-96718186	0.610449	0.407374	0.087085	6.92689e-06	0.000835628
cg22902266	9	96714313	BARX1	chr9:96713326-96718186	0.608548	0.487321	0.187963	5.91526e-05	0.00404468
cg03129964	9	96714665	BARX1	chr9:96713326-96718186	0.394772	0.251141	0.0660888	0.00227329	0.0476395
cg10454937	9	96715047	BARX1	chr9:96713326-96718186	0.581613	0.328769	0.0721725	0.000508712	0.018755
cg13398482	9	96715256	BARX1	chr9:96713326-96718186	0.71814	0.281983	0.0704485	5.72089e-06	0.000725294
cg13773631	9	96715843	BARX1	chr9:96713326-96718186	0.781457	0.46327	0.29661	0.00197245	0.0437801
cg16283077	11	129306730	BARX2	chr11:129306659-129306882	0.96333	0.315831	0.953093	8.00012e-17	1.43716e-12
cg05471602	11	129306737	BARX2	chr11:129306659-129306882	0.947189	0.38454	0.938628	1.02015e-07	3.3111e-05
cg13085404	11	129306881	BARX2	chr11:129306659-129306882	0.861618	0.416661	0.806689	0.000267642	0.0120199
cg15571705	11	129308733	BARX2	chr11:129306659-129306882	0.802549	0.3963	0.742335	0.000441136	0.0170486
cg03509193	11	129309495	BARX2	chr11:129306659-129306882	0.770611	0.336502	0.70506	0.000835061	0.0257868
cg01923514	20	31781277	BASE		0.445474	0.0915965	0.208604	0.000244125	0.0112387
cg11854007	20	31781697	BASE		0.800347	0.276151	0.737354	4.31987e-05	0.00323457
cg09981533	6	31507701	BAT1	chr6:31509668-31509896	0.349252	0.662295	0.373396	0.00142493	0.0359251
cg03031988	6	31510729	BAT1	chr6:31509668-31509896	0.306471	0.761457	0.183579	0.000595126	0.0207732
cg01341355	6	31505493	BAT1;SNORD117		0.254051	0.731738	0.21449	0.000297815	0.0130102
cg05216536	6	31505496	BAT1;SNORD117		0.350028	0.815528	0.245518	0.00136631	0.0350587
cg04477431	6	31631716	BAT4	chr6:31632815-31634093	0.566984	0.87477	0.606743	0.00161501	0.0388778
cg04102384	6	31668622	BAT5	chr6:31670594-31671274	0.534506	0.253074	0.325322	0.00176725	0.0409917
cg20025630	6	31668777	BAT5	chr6:31670594-31671274	0.766819	0.298796	0.584071	0.00195657	0.0435802
cg23300882	7	72863900	BAZ1B		0.236943	0.933672	0.267114	4.02232e-06	0.000557881
cg15207885	7	72920484	BAZ1B		0.560831	0.86967	0.26758	0.000655391	0.0220497
cg21560142	19	47730821	BBC3	chr19:47731377-47731715	0.0595181	0.201591	0.0468583	6.09512e-05	0.00413388
cg03885664	16	56554271	BBS2	chr16:56553529-56554075	0.20384	0.616388	0.161939	0.000406357	0.0161052
cg17700443	3	107348775	BBX		0.904659	0.938085	0.909269	0.00025783	0.0117013
cg04539418	3	107525320	BBX		0.324829	0.886029	0.389117	4.48956e-06	0.000603638
cg06522456	19	45311781	BCAM	chr19:45312059-45312397	0.0729935	0.178822	0.0475699	0.000593615	0.0207328
cg14037553	19	45314566	BCAM	chr19:45315377-45315722	0.420859	0.781354	0.373625	3.47045e-05	0.00274747
cg23318764	19	45315721	BCAM	chr19:45315377-45315722	0.268877	0.584538	0.212294	0.00110338	0.0306535
cg21475402	1	156612140	BCAN	chr1:156611639-156612447	0.262604	0.570501	0.101126	0.00120388	0.0323417
cg09182138	1	156612436	BCAN	chr1:156611639-156612447	0.65511	0.738629	0.343365	0.00212038	0.0456518
cg22439792	1	156613060	BCAN	chr1:156611639-156612447	0.871484	0.827928	0.717084	8.08304e-05	0.00508948
cg16519668	16	75279566	BCAR1		0.578275	0.101973	0.164342	5.91801e-06	0.000745216
cg02490847	16	75282051	BCAR1	chr16:75284680-75285821	0.545721	0.143476	0.316148	0.000261414	0.0118134
cg01262865	16	75282094	BCAR1	chr16:75284680-75285821	0.544821	0.268261	0.389772	0.000136266	0.0074306
cg04914057	16	75283093	BCAR1	chr16:75284680-75285821	0.612099	0.154948	0.353055	1.72166e-05	0.00164512
cg04154142	16	75289363	BCAR1	chr16:75284680-75285821	0.834218	0.318269	0.750616	7.51319e-07	0.000153373
cg10495683	1	94054019	BCAR3		0.891129	0.233769	0.881655	9.00532e-08	3.01522e-05
cg02978297	1	94057587	BCAR3		0.479334	0.0360127	0.136274	0.00065661	0.0220722
cg08237401	1	94057789	BCAR3		0.731552	0.115791	0.280448	6.17291e-07	0.000132425
cg15925478	1	94081080	BCAR3		0.869467	0.155718	0.886525	6.11863e-10	5.77185e-07
cg07231911	1	94141047	BCAR3		0.691525	0.511058	0.149136	7.94884e-05	0.00502951
cg23682609	20	52687365	BCAS1		0.335053	0.798029	0.814375	1.74781e-05	0.00166165
cg25780632	20	52687924	BCAS1		0.470107	0.867497	0.773217	0.000514876	0.0189081
cg04775566	17	59079434	BCAS3		0.856526	0.904822	0.861948	0.00167399	0.0397228
cg23455651	20	49457247	BCAS4	chr20:49457137-49457342	0.839306	0.675438	0.848111	0.00145798	0.0364364
cg16294280	12	25048139	BCAT1		0.856602	0.771974	0.508784	4.925e-05	0.00355564
cg19561607	12	25103173	BCAT1	chr12:25101607-25102073	0.273617	0.624324	0.277112	0.00145508	0.0363792
cg07259733	12	25103643	BCAT1	chr12:25101607-25102073	0.87268	0.459051	0.892626	6.15103e-05	0.00416087
cg23656890	12	25071685	BCAT1;DAD1L		0.553322	0.117319	0.369621	0.00122708	0.0327463
cg27061836	19	49310606	BCAT2	chr19:49314097-49314434	0.875604	0.29117	0.498332	5.10081e-05	0.00364239
cg24302752	6	80853625	BCKDHB		0.820378	0.450583	0.814917	7.25343e-05	0.00469262
cg12044693	6	80873769	BCKDHB		0.42061	0.583352	0.89752	0.000153365	0.00806502
cg04305912	2	60685678	BCL11A	chr2:60687822-60688992	0.79422	0.873437	0.776416	0.0019896	0.0439666
cg08426369	2	60753602	BCL11A		0.916005	0.816614	0.909241	0.000278836	0.0123642
cg19333114	2	60777419	BCL11A	chr2:60776596-60778157	0.0572771	0.184024	0.0502507	0.00138443	0.0353242
cg21602520	18	60985380	BCL2	chr18:60985503-60985741	0.126536	0.60099	0.26781	0.000268377	0.0120438
cg21234506	15	80263132	BCL2A1		0.855665	0.517677	0.810013	1.99278e-07	5.52225e-05
cg00300298	20	30308956	BCL2L1	chr20:30310503-30310707	0.0582561	0.695446	0.117851	1.24636e-07	3.82542e-05
cg11729679	2	111877065	BCL2L11	chr2:111875206-111880965	0.735483	0.318831	0.428319	0.00110509	0.0306749
cg09907170	2	111877177	BCL2L11	chr2:111875206-111880965	0.731443	0.449595	0.558702	0.000223977	0.0105305
cg06363163	2	111914486	BCL2L11		0.557294	0.887736	0.815139	0.00189616	0.0427647
cg22949949	12	12223661	BCL2L14		0.814794	0.108568	0.462998	5.83765e-08	2.17273e-05
cg18223430	12	12223841	BCL2L14		0.796739	0.478745	0.432384	0.000226718	0.0106262
cg24921858	12	12223989	BCL2L14		0.791396	0.265338	0.859792	5.06141e-05	0.00362687
cg10156274	12	12247855	BCL2L14		0.898007	0.404051	0.813853	1.88545e-06	0.000313013
cg03325407	1	114423726	BCL2L15		0.84569	0.185991	0.811794	6.47159e-09	3.92068e-06
cg24550026	1	114430031	BCL2L15		0.824667	0.490676	0.822727	3.3557e-05	0.00267818
cg21606696	19	45259535	BCL3	chr19:45260352-45261809	0.433792	0.875808	0.640928	2.05184e-06	0.000333341
cg19587318	19	45260353	BCL3	chr19:45260352-45261809	0.45291	0.874548	0.640854	0.000110026	0.00635809
cg23696248	19	45260501	BCL3	chr19:45260352-45261809	0.403151	0.794598	0.462396	0.000958677	0.0280506
cg20779314	1	147067924	BCL9	chr1:147071249-147071875	0.813903	0.898953	0.812022	0.00128385	0.0337241
cg10858196	11	118773555	BCL9L		0.97462	0.960936	0.975696	0.000131716	0.00724657
cg20865656	11	118773752	BCL9L		0.959036	0.942767	0.950421	0.000594354	0.0207528
cg03780927	11	118781150	BCL9L	chr11:118781060-118781732	0.650308	0.0468516	0.102809	0.000277586	0.0123298
cg26811705	11	118781408	BCL9L	chr11:118781060-118781732	0.577842	0.112571	0.136157	0.000588771	0.020621
cg08805054	11	118781728	BCL9L	chr11:118781060-118781732	0.757416	0.4358	0.307452	0.000305571	0.0132217
cg11874426	11	118781731	BCL9L	chr11:118781060-118781732	0.769176	0.465626	0.318914	0.000166692	0.00856953
cg15350899	11	118781763	BCL9L	chr11:118781060-118781732	0.760018	0.412203	0.400502	7.70371e-05	0.00491202
cg20337103	11	118781778	BCL9L	chr11:118781060-118781732	0.685701	0.119681	0.122508	2.09948e-07	5.76382e-05
cg02341556	11	118781978	BCL9L	chr11:118781060-118781732	0.586364	0.0638677	0.0716575	4.20436e-06	0.000575784
cg13291694	6	136584563	BCLAF1		0.766313	0.382479	0.287776	1.81023e-06	0.000303919
cg26827725	16	81271937	BCMO1		0.657283	0.196223	0.352752	0.000171399	0.0087365
cg26781524	16	81272080	BCMO1		0.534381	0.0509055	0.104649	0.000689505	0.0227608
cg06737981	22	23523942	BCR	chr22:23522550-23524465	0.235149	0.728589	0.391783	0.000183008	0.00915797
cg16775939	3	197247220	BDH1		0.951843	0.304636	0.873307	6.03803e-10	5.70886e-07
cg19798702	3	197247751	BDH1		0.870164	0.0618863	0.205336	1.90495e-13	7.53739e-10
cg09610644	3	197249274	BDH1		0.87175	0.680288	0.330375	3.83955e-08	1.5432e-05
cg10126931	3	197300499	BDH1		0.607767	0.582368	0.14832	0.00117011	0.0317774
cg03131527	3	197301250	BDH1		0.801089	0.837925	0.366314	4.14254e-07	9.69743e-05
cg20108357	11	27718978	BDNF	chr11:27721661-27722639	0.860874	0.267952	0.74839	3.18252e-07	7.9118e-05
cg06816235	11	27742219	BDNF	chr11:27742059-27742273	0.0607724	0.334353	0.0584963	0.0012666	0.0334096
cg08388004	11	27679632	BDNF;BDNFOS		0.94159	0.907178	0.936947	0.00055363	0.0198114
cg14291693	11	27683959	BDNF;BDNFOS		0.796922	0.384827	0.65381	0.00198779	0.0439578
cg05670898	16	66460448	BEAN	chr16:66460503-66460850	0.430477	0.808449	0.256295	0.000115658	0.00657793
cg02685286	17	40972475	BECN1	chr17:40976159-40976421	0.735664	0.0944751	0.512128	1.77884e-05	0.00168606
cg05287512	14	101009338	BEGAIN	chr14:101012840-101013117	0.848992	0.500978	0.82106	1.5847e-07	4.61423e-05
cg18516195	14	101012996	BEGAIN	chr14:101012840-101013117	0.120011	0.525847	0.271953	0.000168253	0.00862505
cg01963573	6	107388925	BEND3	chr6:107389962-107391251	0.756363	0.282644	0.553975	3.33483e-05	0.00266519
cg12693875	4	42137257	BEND4		0.86171	0.431134	0.801917	2.0577e-09	1.56862e-06
cg14632941	4	42156182	BEND4	chr4:42152766-42154984	0.461521	0.0865799	0.174065	0.000200304	0.00972742
cg20584555	11	61717780	BEST1		0.700791	0.679737	0.398208	0.00123121	0.0328112
cg23591609	12	70092840	BEST3		0.179286	0.64988	0.211627	9.06862e-05	0.00554199
cg17277939	12	70093008	BEST3		0.240798	0.918389	0.339432	2.92532e-06	0.00043798
cg04886703	1	45250266	BEST4	chr1:45249860-45250352	0.0194309	0.534065	0.0370151	0.000790455	0.0248401
cg15502465	1	45250440	BEST4	chr1:45251962-45252292	0.125291	0.524717	0.133179	0.00011884	0.00671709
cg01264751	7	93629761	BET1	chr7:93633439-93633910	0.703165	0.297749	0.800423	1.47579e-06	0.000257826
cg12262781	6	116866784	BET3L;FAM26D		0.751498	0.299699	0.599783	0.000932604	0.0275789
cg23741330	6	116832940	BET3L;FAM26E		0.67026	0.14356	0.569078	0.000479121	0.0180393
cg23032598	20	17512795	BFSP1	chr20:17511478-17512209	0.732104	0.822759	0.727193	0.00210647	0.0454915
cg25249068	3	133118940	BFSP2		0.817217	0.41656	0.573954	2.60223e-08	1.14502e-05
cg10218777	3	133180261	BFSP2		0.832576	0.896059	0.817831	0.0019194	0.0430889
cg08988226	3	133191851	BFSP2		0.663931	0.488778	0.678953	0.00244274	0.0497477
cg15061954	12	32299085	BICD1		0.611325	0.871546	0.39259	0.000924207	0.0274088
cg14655569	9	95473718	BICD2	chr9:95477296-95477708	0.79082	0.528971	0.482858	0.00115201	0.0314864
cg18477117	2	127830703	BIN1		0.796258	0.843934	0.77646	0.000747029	0.0239657
cg02929431	12	51713220	BIN2		0.651297	0.257666	0.634323	0.0008185	0.025437
cg11331803	8	22509991	BIN3		0.883231	0.915535	0.864341	0.00175611	0.040871
cg26207239	11	102231936	BIRC2		0.770682	0.853691	0.779952	0.00191206	0.042973
cg20055924	2	32587004	BIRC6	chr2:32581746-32583265	0.867667	0.892642	0.298324	7.78167e-12	1.66591e-08
cg00545886	20	36146069	BLCAP	chr20:36148603-36150136	0.758229	0.508074	0.804521	0.00126125	0.0333217
cg11948874	20	36147327	BLCAP	chr20:36148603-36150136	0.710936	0.298073	0.7644	0.000298737	0.0130353
cg13591710	20	36147340	BLCAP	chr20:36148603-36150136	0.82846	0.352102	0.838233	8.7416e-06	0.000989811
cg18244708	20	36152923	BLCAP	chr20:36150920-36151240	0.34905	0.590153	0.660822	0.000289479	0.0127368
cg13108397	15	91263157	BLM	chr15:91260384-91260919	0.893009	0.917397	0.864693	0.00166985	0.0396576
cg13410000	15	91357521	BLM		0.525194	0.156778	0.507537	0.00223457	0.0471527
cg07397033	10	98031201	BLNK		0.609029	0.112178	0.252074	0.00122329	0.0326825
cg08901339	10	98031261	BLNK		0.652327	0.0908387	0.247262	0.00204676	0.0447234
cg12926596	12	56111944	BLOC1S1	chr12:56109798-56110298	0.655137	0.408937	0.161393	0.000690876	0.0227925
cg26610808	10	102046685	BLOC1S2	chr10:102046142-102046632	0.0864891	0.322601	0.125451	0.000204828	0.00987417
cg19653594	19	40972323	BLVRB;SPTBN4	chr19:40971476-40973393	0.0765395	0.59249	0.270647	9.55868e-05	0.00575801
cg00608548	19	40972521	BLVRB;SPTBN4	chr19:40971476-40973393	0.2403	0.666053	0.525499	0.00105259	0.0297615
cg09749364	15	40384779	BMF		0.167178	0.672571	0.0729385	4.6517e-05	0.00340621
cg17782713	10	22613360	BMI1	chr10:22614275-22614934	0.823446	0.917051	0.854279	0.00127678	0.0336008
cg19225068	10	22614933	BMI1	chr10:22614275-22614934	0.0272445	0.0284452	0.0597665	0.000542399	0.0195521
cg26665274	20	6747409	BMP2	chr20:6748052-6749546	0.926108	0.709803	0.805794	0.000903206	0.0270364
cg23534245	20	6751435	BMP2	chr20:6748052-6749546	0.652481	0.205326	0.23246	1.11815e-05	0.00119193
cg04334979	4	79732488	BMP2K		0.870854	0.916338	0.874043	0.000361653	0.014892
cg00359661	6	7725787	BMP6	chr6:7726095-7728161	0.105329	0.566341	0.0990118	2.24606e-05	0.00199402
cg26010756	6	7731069	BMP6	chr6:7728885-7729108	0.833367	0.108319	0.598405	4.12192e-05	0.00312252
cg11611127	7	34084760	BMPER		0.888431	0.431769	0.775071	0.00109829	0.0305622
cg00348598	7	34117970	BMPER	chr7:34118463-34118759	0.522072	0.442566	0.199488	0.00158811	0.0384735
cg25619157	10	88520943	BMPR1A	chr10:88515426-88517217	0.624249	0.0964427	0.214807	1.23511e-06	0.000225139
cg06941037	10	88534973	BMPR1A		0.716566	0.0704846	0.293241	2.93775e-06	0.00043899
cg11566832	10	88659593	BMPR1A		0.730084	0.581845	0.528462	0.00033929	0.0142235
cg02471310	4	95816391	BMPR1B		0.805978	0.262145	0.289089	4.16752e-06	0.000572057
cg15287353	4	95818408	BMPR1B		0.755059	0.38366	0.337297	3.28178e-06	0.000477599
cg12007466	4	96025493	BMPR1B		0.820818	0.630384	0.422468	0.000728946	0.023587
cg21574271	4	96051461	BMPR1B		0.805603	0.665267	0.292224	0.000829402	0.0256677
cg06147895	10	133791401	BNIP3	chr10:133793426-133793647	0.845931	0.0884849	0.416657	1.13598e-06	0.000210759
cg02886408	10	133796164	BNIP3	chr10:133794898-133796598	0.0470163	0.209281	0.0247887	0.00131046	0.034174
cg05401364	3	112967129	BOC		0.787332	0.349212	0.5887	0.00174011	0.0406327
cg13272743	3	112983074	BOC		0.30275	0.867819	0.287989	0.000155185	0.00813072
cg11882488	3	112983145	BOC		0.299227	0.861585	0.263991	5.01564e-06	0.000655805
cg02498206	3	112987015	BOC		0.92821	0.669443	0.916654	0.000592905	0.0207131
cg11374368	2	242497960	BOK	chr2:242498013-242499274	0.171967	0.488843	0.19942	9.67623e-07	0.000186429
cg14333539	2	242499512	BOK	chr2:242498013-242499274	0.713501	0.818463	0.348977	0.000292796	0.0128384
cg24828208	2	242500484	BOK	chr2:242498013-242499274	0.735938	0.834251	0.407243	0.000112841	0.00646706
cg20329047	8	145514383	BOP1;HSF1	chr8:145514719-145515959	0.332827	0.653697	0.575817	0.000589047	0.0206272
cg03294961	20	31594014	BPIL1		0.90608	0.29764	0.905693	9.38123e-09	5.14661e-06
cg04350066	20	31594060	BPIL1		0.767548	0.124405	0.810572	1.69668e-05	0.00162614
cg13696012	20	31595360	BPIL1		0.869072	0.252255	0.703962	2.07915e-05	0.0018806
cg08918845	20	31595432	BPIL1		0.765497	0.211465	0.557006	2.27073e-05	0.0020099
cg03097190	22	32854361	BPIL2		0.534831	0.266619	0.605707	0.001728	0.0404882
cg22416021	22	50177941	BRD1	chr22:50177720-50178221	0.952742	0.970539	0.939732	0.00244816	0.0497918
cg13773148	9	136923109	BRD3	chr9:136919143-136919376	0.913889	0.842519	0.636074	0.00239648	0.04914
cg26771969	19	15358258	BRD4		0.488909	0.22773	0.168651	0.00032466	0.0137666
cg06045123	16	50353003	BRD7		0.758347	0.279266	0.755918	1.89448e-05	0.00176098
cg07308931	5	893015	BRD9;TRIP13	chr5:892522-893479	0.0160321	0.0103954	0.0151476	0.00162867	0.0390811
cg10446433	2	28442539	BRE		0.823816	0.574901	0.506109	0.000112442	0.00645022
cg02857312	2	28449036	BRE		0.831468	0.8784	0.807584	0.00127156	0.0334915
cg22864500	2	28491946	BRE		0.819349	0.110859	0.237544	5.18975e-10	5.08124e-07
cg18498108	8	144778836	BREA2	chr8:144776009-144776734	0.88314	0.612416	0.892585	4.91246e-07	0.00011037
cg19904653	8	37707692	BRF2	chr8:37707149-37707507	0.0724972	0.336637	0.0695345	0.00190365	0.0428399
cg02968606	14	36298812	BRMS1L	chr14:36295427-36296030	0.825061	0.886764	0.802998	0.00029511	0.0129111
cg18133074	11	1473084	BRSK2	chr11:1471339-1471595	0.836122	0.891638	0.861037	0.00244153	0.0497358
cg15803845	11	1474777	BRSK2	chr11:1471339-1471595	0.362847	0.809967	0.437025	0.000587564	0.0205997
cg17018661	11	1480166	BRSK2	chr11:1481390-1481615	0.368859	0.833407	0.532757	0.000307161	0.0132739
cg25533997	18	35144259	BRUNOL4	chr18:35144907-35147628	0.230007	0.60452	0.147798	0.00183495	0.0419521
cg21404878	15	72578605	BRUNOL6	chr15:72581710-72582317	0.844331	0.378295	0.547664	0.00168581	0.0398956
cg18574499	21	40669669	BRWD1		0.74029	0.909814	0.267093	2.61918e-06	0.000401999
cg24296397	3	49692537	BSN	chr3:49690022-49690329	0.347056	0.882579	0.69012	0.000560543	0.0199589
cg22162435	1	55465282	BSND	chr1:55462688-55463010	0.74933	0.309175	0.698939	2.0901e-05	0.00188918
cg06000781	4	15703606	BST1	chr4:15704640-15705000	0.912584	0.926645	0.897224	0.00191428	0.0430089
cg03812107	11	122849037	BSX	chr11:122847494-122848608	0.637198	0.0830489	0.641049	0.00147129	0.0366515
cg16167240	11	122852284	BSX	chr11:122852411-122852699	0.630222	0.0998501	0.709477	0.000179105	0.00902131
cg00174508	12	107774298	BTBD11		0.6786	0.32474	0.20958	4.93358e-07	0.000110724
cg01686739	12	107855547	BTBD11		0.684537	0.893553	0.427721	0.000436834	0.0169346
cg02950621	16	3635098	BTBD12	chr16:3639092-3639306	0.941429	0.725423	0.965487	0.000982555	0.028511
cg25019648	17	72353261	BTBD17	chr17:72352827-72353798	0.401596	0.0157641	0.0143519	0.000207029	0.00994994
cg04982308	17	72353473	BTBD17	chr17:72352827-72353798	0.690292	0.154185	0.247681	2.45903e-05	0.00213
cg09267483	17	72353512	BTBD17	chr17:72352827-72353798	0.467654	0.048947	0.096367	5.45184e-05	0.00381792
cg12467933	17	72353536	BTBD17	chr17:72352827-72353798	0.477635	0.100163	0.201229	0.000196735	0.00962537
cg22026616	1	45275340	BTBD19	chr1:45278765-45279644	0.53461	0.118101	0.451507	1.29537e-05	0.00132643
cg17093466	1	45276537	BTBD19	chr1:45278765-45279644	0.554671	0.278539	0.612904	0.000407161	0.0161293
cg06766016	1	45278971	BTBD19	chr1:45278765-45279644	0.214505	0.955864	0.276281	3.61733e-08	1.47396e-05
cg19530728	1	45279132	BTBD19	chr1:45278765-45279644	0.248671	0.87061	0.309527	1.06291e-07	3.39913e-05
cg12275060	1	45279329	BTBD19	chr1:45278765-45279644	0.169298	0.837499	0.213978	7.11052e-09	4.21008e-06
cg03912703	1	45279349	BTBD19	chr1:45278765-45279644	0.189403	0.899138	0.232015	4.54635e-10	4.5572e-07
cg00902496	1	45279638	BTBD19	chr1:45278765-45279644	0.153375	0.802777	0.14649	2.58693e-11	4.23127e-08
cg01059432	1	45279684	BTBD19	chr1:45278765-45279644	0.160093	0.778346	0.133837	3.7196e-11	5.69203e-08
cg26927807	19	2016532	BTBD2		0.43449	0.92096	0.55675	0.00159414	0.0385542
cg10101680	14	93770551	BTBD7		0.912702	0.924918	0.897608	0.00229904	0.0479533
cg10567378	6	38145232	BTBD9		0.615917	0.311129	0.333855	0.00062589	0.0214235
cg14854901	5	72793969	BTF3	chr5:72794040-72794641	0.130218	0.318223	0.122611	0.000238556	0.0110415
cg23035209	5	72795181	BTF3	chr5:72794040-72794641	0.154568	0.697777	0.188317	1.87053e-06	0.000311142
cg17889439	13	77501954	BTF3L1		0.727949	0.23897	0.504716	0.00139492	0.0354611
cg05819371	12	92540484	BTG1	chr12:92538710-92540333	0.0769245	0.41143	0.104775	0.00188331	0.042605
cg12414502	6	26468835	BTN2A1		0.868489	0.902591	0.877943	0.00170338	0.0401366
cg15676542	6	26421231	BTN2A3		0.484938	0.772652	0.115125	0.000530473	0.0192589
cg16045677	6	32362678	BTNL2		0.408495	0.314479	0.899968	0.000293647	0.0128675
cg25663310	6	32363888	BTNL2		0.380918	0.233692	0.826109	0.000330076	0.0139333
cg12966392	6	32364075	BTNL2		0.321394	0.442588	0.865453	2.78325e-05	0.0023421
cg14241129	6	32367729	BTNL2		0.434947	0.536746	0.859891	0.00115134	0.0314786
cg16004593	6	32369487	BTNL2		0.0644101	0.0340969	0.237676	0.00146679	0.0365843
cg17961273	6	32370637	BTNL2		0.140316	0.0912478	0.416279	0.000542692	0.0195576
cg18584440	6	32370815	BTNL2		0.236391	0.138015	0.510979	0.00157151	0.0382257
cg19416605	6	32370846	BTNL2		0.346549	0.387913	0.763469	0.00203374	0.0445472
cg15319032	6	32371506	BTNL2		0.184013	0.126798	0.480442	0.00140372	0.0356081
cg15815970	6	32371533	BTNL2		0.205113	0.0811827	0.538272	0.00173694	0.0405981
cg14096229	6	32374493	BTNL2		0.165727	0.0767152	0.579759	0.00065701	0.0220754
cg25391023	6	32374754	BTNL2		0.198191	0.0693861	0.656058	4.24079e-05	0.00318928
cg00978102	6	32375231	BTNL2		0.239948	0.137901	0.680421	0.000318464	0.0136016
cg24980235	11	116643740	BUD13	chr11:116643309-116643892	0.0157073	0.0194116	0.0152193	0.00176242	0.0409416
cg21557879	17	56381668	BZRAP1		0.505469	0.23169	0.262702	0.000529859	0.0192443
cg00047501	2	201680860	BZW1L1;BZW1	chr2:201675989-201677306	0.699765	0.329325	0.354495	0.00061955	0.0213089
cg21660861	7	16700959	BZW2		0.349633	0.769372	0.26474	0.000418375	0.01646
cg18903093	10	63422511	C10orf107	chr10:63422538-63423105	0.561944	0.0910143	0.213786	0.000114086	0.00651431
cg04438074	10	63422539	C10orf107	chr10:63422538-63423105	0.567119	0.250216	0.262073	0.00153499	0.0376773
cg10936057	10	708425	C10orf108;DIP2C	chr10:711896-712395	0.304854	0.90095	0.469715	0.000147482	0.00785357
cg03006953	10	77842199	C10orf11		0.738657	0.372191	0.746565	0.000205001	0.00987706
cg25786525	10	77991332	C10orf11		0.585565	0.0768543	0.118561	5.86332e-06	0.000739945
cg15011837	10	1071902	C10orf110;IDI2		0.848856	0.402361	0.83717	0.000413638	0.0163249
cg24324815	10	21783445	C10orf114	chr10:21783198-21786420	0.564916	0.95946	0.227983	0.000140733	0.00760696
cg10540364	10	21783539	C10orf114	chr10:21783198-21786420	0.0363624	0.556025	0.0312595	5.93334e-06	0.000746275
cg14365271	10	21783701	C10orf114	chr10:21783198-21786420	0.0157029	0.374064	0.0150809	0.00119843	0.0322456
cg26867545	10	21803830	C10orf140	chr10:21805197-21805459	0.550242	0.714428	0.413137	0.000768568	0.0244347
cg20125920	10	21804624	C10orf140	chr10:21805197-21805459	0.839047	0.889588	0.456206	5.97297e-07	0.000128804
cg16248287	10	21804965	C10orf140	chr10:21805197-21805459	0.396245	0.678225	0.161013	0.00183676	0.0419703
cg02738256	10	21805358	C10orf140	chr10:21805197-21805459	0.0540154	0.39155	0.0318395	0.00103421	0.0294219
cg09172296	10	21807166	C10orf140	chr10:21805197-21805459	0.16277	0.718616	0.149725	2.93341e-05	0.00242889
cg03846926	10	21807211	C10orf140	chr10:21805197-21805459	0.061132	0.641193	0.059078	0.000907674	0.027121
cg07135237	10	21808126	C10orf140	chr10:21805879-21806630	0.200494	0.768924	0.146297	1.86916e-06	0.000311142
cg09262442	10	5728078	C10orf18	chr10:5726455-5727697	0.323592	0.786383	0.143204	6.9446e-05	0.00455379
cg27517345	10	104536052	C10orf26		0.705019	0.196567	0.522404	0.00192968	0.0432234
cg19730379	10	104542002	C10orf26		0.623953	0.0717898	0.160141	4.81719e-05	0.00349797
cg15615645	10	104543040	C10orf26		0.810826	0.922836	0.324963	0.00014006	0.0075805
cg09671951	10	104556332	C10orf26		0.696491	0.081024	0.228118	4.25418e-05	0.00319761
cg14087083	10	104575064	C10orf26		0.746176	0.905027	0.387243	0.000111673	0.00641821
cg08330031	10	104623503	C10orf32		0.763718	0.68178	0.414127	5.60653e-06	0.00071409
cg10642548	10	77165750	C10orf41	chr10:77155128-77169600	0.588076	0.131281	0.290282	0.00125341	0.0331825
cg06262069	10	77165905	C10orf41	chr10:77155128-77169600	0.666607	0.0930311	0.249217	0.00010391	0.00610021
cg05330121	10	77166684	C10orf41	chr10:77155128-77169600	0.61078	0.0708088	0.189978	0.000466428	0.0176821
cg10023838	10	11866199	C10orf47	chr10:11865125-11865984	0.758839	0.510207	0.768323	0.00175921	0.0408975
cg24405543	10	11872888	C10orf47		0.899847	0.703627	0.91797	0.000600901	0.0209277
cg23378142	10	26883165	C10orf50		0.694395	0.105872	0.4667	0.000458867	0.0174869
cg03599037	10	82172508	C10orf58	chr10:82168064-82168917	0.416269	0.782009	0.217817	3.93042e-05	0.00301562
cg17886697	10	128193400	C10orf90	chr10:128193311-128193531	0.397274	0.59655	0.682868	0.00142512	0.0359259
cg20592447	10	128211184	C10orf90		0.725775	0.282152	0.728882	0.00055695	0.0198861
cg08325191	10	134756610	C10orf93	chr10:134755663-134756852	0.0480532	0.311586	0.0237268	0.00224507	0.047286
cg01218580	10	118083830	C10orf96		0.794099	0.494901	0.882647	0.00054628	0.0196338
cg24971384	10	118083918	C10orf96		0.802113	0.430493	0.816513	0.000559321	0.0199377
cg07798731	10	85932296	C10orf99		0.694114	0.31134	0.532953	0.00106467	0.0299945
cg09026379	11	64067248	C11orf20;KCNK4	chr11:64066757-64068741	0.092219	0.610336	0.10975	0.00114218	0.0313236
cg18502617	11	64067409	C11orf20;KCNK4	chr11:64066757-64068741	0.0893607	0.571406	0.101018	0.00181996	0.0417673
cg17678115	11	30358274	C11orf46		0.864608	0.89434	0.83359	0.00183453	0.0419447
cg24485284	11	30358536	C11orf46		0.891774	0.385706	0.701422	1.30536e-05	0.00133435
cg03339077	11	47165057	C11orf49		0.254877	0.72406	0.687407	3.21388e-06	0.000469553
cg13745279	11	111788810	C11orf52		0.768673	0.273549	0.474961	1.28655e-05	0.00131944
cg08142096	11	111125837	C11orf53		0.402761	0.13031	0.198332	0.00126078	0.0333115
cg22187376	11	111126172	C11orf53		0.781937	0.28334	0.665101	0.000369518	0.0151241
cg08919594	11	111126546	C11orf53		0.847679	0.691002	0.779552	0.00178416	0.0412565
cg03310479	11	93476721	C11orf54	chr11:93474085-93475075	0.881716	0.928643	0.557293	0.00013668	0.00744535
cg17065810	11	93491807	C11orf54		0.843492	0.762539	0.833951	0.00166238	0.0395677
cg09116009	11	71815101	C11orf59;LRTOMT	chr11:71814203-71814529	0.896336	0.932251	0.694798	0.00207719	0.0450996
cg21795497	11	122753326	C11orf63	chr11:122753386-122753951	0.059612	0.106874	0.0602819	0.00172608	0.0404635
cg26239495	11	122791447	C11orf63		0.361339	0.871421	0.489823	0.000238262	0.0110351
cg07031665	11	77532174	C11orf67;RSF1	chr11:77531186-77532262	0.0202279	0.0312494	0.0222382	2.76887e-05	0.00233142
cg17141500	11	77532182	C11orf67;RSF1	chr11:77531186-77532262	0.0170618	0.0243459	0.0190703	0.000848525	0.0260159
cg22821606	11	77532200	C11orf67;RSF1	chr11:77531186-77532262	0.0174963	0.023829	0.0177658	0.000533196	0.0193151
cg15105081	11	77532226	C11orf67;RSF1	chr11:77531186-77532262	0.0277707	0.0396403	0.0318133	0.00208578	0.0452289
cg11907564	11	114271474	C11orf71;RBM7	chr11:114270799-114271690	0.0394121	0.0739337	0.0367407	0.0002092	0.0100193
cg10395222	11	82612636	C11orf82;PRCP	chr11:82612259-82612844	0.0230369	0.0308418	0.0232982	8.35407e-05	0.00521326
cg26431519	11	109291380	C11orf87	chr11:109293519-109294983	0.863432	0.412212	0.830395	0.00117351	0.0318275
cg09059880	11	109295290	C11orf87	chr11:109293519-109294983	0.872309	0.264348	0.831603	2.91399e-07	7.38191e-05
cg06482904	11	61537000	C11orf9		0.898084	0.982437	0.546569	0.000579963	0.0204218
cg07136108	11	61545187	C11orf9	chr11:61544727-61545563	0.429226	0.866179	0.366075	0.00196241	0.0436629
cg10045354	11	111169427	C11orf92;C11orf93	chr11:111169304-111170428	0.715774	0.272537	0.488415	0.00121585	0.0325404
cg26459819	11	111169457	C11orf92;C11orf93	chr11:111169304-111170428	0.58868	0.0807529	0.22505	0.000621549	0.0213484
cg21645554	11	111169473	C11orf92;C11orf93	chr11:111169304-111170428	0.594764	0.0422418	0.260777	0.000711781	0.0232305
cg02164088	11	45928937	C11orf94		0.346029	0.663751	0.372625	0.00224407	0.0472721
cg04986616	11	63537378	C11orf95	chr11:63535652-63537435	0.0598647	0.621116	0.0935444	0.00149956	0.0370772
cg09907758	11	63537459	C11orf95	chr11:63535652-63537435	0.129771	0.641435	0.162769	0.00138995	0.0353825
cg22150397	12	82752718	C12orf26;CCDC59	chr12:82752004-82752746	0.0745907	0.0464203	0.0671718	0.00173231	0.0405317
cg03652173	12	82753120	C12orf26;CCDC59	chr12:82752004-82752746	0.0680693	0.0446093	0.117773	0.000351444	0.0145919
cg07545743	12	121409957	C12orf27		0.77705	0.0750971	0.449942	1.03498e-06	0.000195812
cg18470891	12	2986957	C12orf32;FOXM1	chr12:2985978-2986639	0.033634	0.048797	0.0454251	0.000566209	0.02009
cg26614264	12	110196466	C12orf34;MGC14436		0.412726	0.921941	0.465008	0.00211554	0.045592
cg26547898	12	13525681	C12orf36		0.818249	0.279551	0.57684	0.000427774	0.0166928
cg11334838	12	4647928	C12orf4;RAD51AP1	chr12:4647844-4648053	0.0400443	0.0318584	0.0472721	0.00216362	0.0462498
cg26155803	12	103697964	C12orf42	chr12:103696090-103696418	0.899015	0.31531	0.788271	0.00058348	0.0204948
cg11150240	12	103698917	C12orf42	chr12:103696090-103696418	0.81686	0.240316	0.625018	1.97552e-05	0.00181145
cg02619087	12	103838906	C12orf42		0.900654	0.0698697	0.732257	6.04878e-06	0.000757107
cg04844692	12	117157450	C12orf49		0.409217	0.90567	0.699229	0.00118476	0.0320202
cg17824939	12	88421705	C12orf50		0.82634	0.601878	0.276175	1.47688e-06	0.000257909
cg17305128	12	64713903	C12orf56		0.83828	0.614571	0.75768	0.00124725	0.0330765
cg14593550	12	7053164	C12orf57	chr12:7053149-7053927	0.148776	0.078786	0.183705	0.000859739	0.0262429
cg14793287	12	48578573	C12orf68	chr12:48577361-48578574	0.578213	0.0861942	0.347226	0.00164572	0.0393551
cg26392671	12	14968223	C12orf69;C12orf60		0.882373	0.914377	0.867146	0.00210324	0.0454501
cg16318994	12	27234550	C12orf71		0.614728	0.228592	0.471944	0.00166579	0.0396083
cg04614923	12	93096622	C12orf74		0.453679	0.042316	0.143219	0.000561356	0.0199775
cg12755471	12	93096780	C12orf74		0.794617	0.0583425	0.209782	1.00205e-07	3.26774e-05
cg27576271	12	93096811	C12orf74		0.80768	0.0916425	0.285172	4.35212e-08	1.71583e-05
cg26383838	12	93096819	C12orf74		0.783413	0.0990678	0.270551	1.08792e-07	3.44183e-05
cg25382573	12	93096844	C12orf74		0.718484	0.0388435	0.155404	1.86019e-05	0.00173967
cg19351533	12	110506707	C12orf76		0.746321	0.816979	0.710704	0.000338818	0.0142118
cg20474972	13	111975407	C13orf16	chr13:111978588-111979099	0.822442	0.445105	0.801743	1.63801e-06	0.000279895
cg01963754	13	111977248	C13orf16	chr13:111978588-111979099	0.898796	0.0926105	0.80958	1.26161e-07	3.85554e-05
cg03299636	13	111977473	C13orf16	chr13:111978588-111979099	0.821941	0.381927	0.730878	2.4111e-07	6.42004e-05
cg24499866	13	111977964	C13orf16	chr13:111978588-111979099	0.794707	0.21951	0.672715	9.73553e-08	3.19499e-05
cg14294077	13	111981135	C13orf16	chr13:111978588-111979099	0.61757	0.102247	0.367194	4.22225e-06	0.000577469
cg00632070	13	31506324	C13orf26		0.886183	0.537386	0.790248	0.00103619	0.0294572
cg10923408	13	31506710	C13orf26		0.668523	0.103459	0.26949	1.58024e-06	0.000272049
cg13614409	13	31506752	C13orf26		0.568178	0.0356125	0.0801248	0.000192215	0.00947167
cg00424169	13	31506837	C13orf26		0.686016	0.416053	0.532535	0.000111521	0.00641494
cg24856064	13	31506963	C13orf26		0.461482	0.110068	0.156409	0.00187801	0.0425341
cg08379987	13	31507139	C13orf26		0.831385	0.0466121	0.600723	4.35514e-05	0.00325219
cg04107005	13	113029350	C13orf28		0.739292	0.412724	0.784201	0.000339578	0.0142312
cg21624282	13	113030783	C13orf28		0.689157	0.240617	0.735149	0.00143333	0.0360625
cg19002027	13	113049747	C13orf28		0.703195	0.0839722	0.550582	1.80228e-06	0.000303076
cg08756033	13	31480128	C13orf33	chr13:31480272-31481105	0.654395	0.138688	0.0987806	2.00378e-07	5.54639e-05
cg24690437	13	31480273	C13orf33	chr13:31480272-31481105	0.243536	0.0902694	0.0940795	0.000310949	0.0133927
cg00570269	13	31480942	C13orf33	chr13:31480272-31481105	0.613293	0.263382	0.379421	0.000881623	0.0266395
cg00367615	13	31480979	C13orf33	chr13:31480272-31481105	0.619064	0.170402	0.289474	0.00156552	0.0381255
cg22032900	13	113301782	C13orf35	chr13:113303306-113303540	0.72883	0.4502	0.850903	0.0003453	0.0144082
cg25217100	13	37249426	C13orf36	chr13:37247949-37248463	0.643909	0.440204	0.139693	0.000330688	0.013952
cg21121616	13	37249450	C13orf36	chr13:37247949-37248463	0.731903	0.379853	0.308678	0.000227227	0.0106397
cg04057861	13	103347391	C13orf39		0.710074	0.395099	0.682853	0.00132128	0.0343389
cg12889533	13	103348095	C13orf39		0.792737	0.35984	0.654731	0.00231455	0.0481555
cg02166473	14	76117456	C14orf1		0.866948	0.755404	0.690625	0.000410661	0.0162322
cg19930885	14	90798539	C14orf102	chr14:90798164-90798394	0.0608991	0.495407	0.0903029	0.000838275	0.0258358
cg13682722	14	90798568	C14orf102	chr14:90798164-90798394	0.0671895	0.38252	0.12672	0.000450318	0.0172694
cg21220520	14	57960464	C14orf105		0.844372	0.0700843	0.689686	2.73568e-06	0.000414948
cg19903229	14	57960650	C14orf105		0.623834	0.0352676	0.0581727	1.45363e-05	0.0014462
cg21493873	14	57960754	C14orf105		0.489646	0.0559588	0.156354	4.41331e-05	0.00328435
cg15661409	14	57960976	C14orf105		0.891197	0.14036	0.841261	3.86923e-12	9.30541e-09
cg14102434	14	57960985	C14orf105		0.889719	0.105761	0.836344	3.03812e-12	7.70109e-09
cg10145926	14	95875792	C14orf139		0.797573	0.318192	0.689467	0.00129154	0.0338664
cg01543583	14	59947673	C14orf149	chr14:59950460-59951527	0.82126	0.943245	0.156628	1.17556e-05	0.00123686
cg01634664	14	91580142	C14orf159		0.149889	0.491869	0.144382	0.000304721	0.0132085
cg03526920	14	77291706	C14orf166B		0.541633	0.84442	0.687366	0.00183876	0.0419963
cg18633154	14	77296234	C14orf166B		0.732485	0.33793	0.727779	4.62752e-06	0.000616768
cg19416032	14	105054940	C14orf180	chr14:105054873-105055113	0.423397	0.65611	0.478631	0.000318326	0.0135971
cg02034085	14	69261594	C14orf181	chr14:69259612-69262900	0.0851629	0.70844	0.0510947	1.31011e-10	1.65424e-07
cg00004939	14	69261661	C14orf181	chr14:69259612-69262900	0.0599346	0.572261	0.0626029	6.04016e-05	0.00410536
cg14442746	14	56264572	C14orf34		0.543395	0.895875	0.807833	0.00236508	0.0487743
cg01933695	14	77495691	C14orf4	chr14:77491938-77495276	0.040244	0.149287	0.0448168	0.000403107	0.016021
cg17454920	14	74185993	C14orf43	chr14:74185482-74185994	0.181911	0.704303	0.196445	0.000790591	0.0248424
cg15499560	14	74192381	C14orf43		0.687355	0.607242	0.181418	1.22402e-05	0.00127261
cg10919522	14	74227441	C14orf43	chr14:74225626-74227209	0.570903	0.856756	0.387904	0.00149846	0.0370616
cg21041579	14	95907997	C14orf49		0.676217	0.325066	0.362137	0.000647831	0.0219077
cg13760395	14	95916072	C14orf49		0.705302	0.34444	0.44798	0.000264586	0.0119176
cg26219458	14	95916220	C14orf49		0.840194	0.68694	0.718368	0.00161202	0.0388395
cg10953436	14	95923976	C14orf49		0.386405	0.90197	0.744551	0.000273273	0.0122065
cg13640769	14	100789624	C14orf68		0.947765	0.700279	0.919594	0.00035885	0.0148135
cg14118465	14	105958792	C14orf80	chr14:105956175-105958197	0.665045	0.816046	0.708417	0.00229077	0.0478563
cg14386691	14	23479657	C14orf93	chr14:23479310-23479532	0.0665612	0.312637	0.0631483	0.00227972	0.0477021
cg11789185	14	23479664	C14orf93	chr14:23479310-23479532	0.0859365	0.344074	0.0811258	0.00244471	0.0497609
cg13906792	15	75199810	C15orf17	chr15:75198639-75199494	0.443645	0.828148	0.298637	0.00119413	0.0321718
cg05305278	15	45803025	C15orf21;SLC30A4		0.779332	0.397106	0.723886	8.90974e-05	0.00547026
cg00623655	15	81440886	C15orf26		0.791637	0.27324	0.730456	2.70127e-06	0.000411238
cg06866395	15	76444525	C15orf27		0.633145	0.285345	0.529211	0.000147135	0.00784321
cg00202460	15	83680873	C15orf40	chr15:83680007-83680532	0.456111	0.840845	0.724357	0.000493511	0.0183816
cg04819351	15	36872220	C15orf41	chr15:36871459-36871897	0.142534	0.671565	0.129207	4.8642e-06	0.00064117
cg18558073	15	36872349	C15orf41	chr15:36871459-36871897	0.243898	0.754651	0.213154	0.000916391	0.0272671
cg26451373	15	37100941	C15orf41;CSNK1A1P		0.862412	0.251962	0.763527	7.67309e-06	0.000897096
cg14525688	15	40544855	C15orf56;PAK6	chr15:40544352-40545512	0.0223187	0.246804	0.0221868	0.00078085	0.0246545
cg17366808	15	73735476	C15orf60	chr15:73735322-73735609	0.954946	0.772152	0.955885	0.00118709	0.0320625
cg03980541	16	67700924	C16orf48;C16orf86	chr16:67700009-67701354	0.0165286	0.0273242	0.0155223	7.17748e-06	0.000855368
cg02642565	16	4579402	C16orf5		0.82765	0.444501	0.899935	0.000310424	0.0133785
cg02130107	16	29828598	C16orf53	chr16:29826662-29828302	0.213238	0.436579	0.202452	0.000111489	0.00641494
cg26285698	16	29757334	C16orf54		0.775519	0.51189	0.328893	7.03429e-05	0.00459364
cg09897970	16	29757344	C16orf54		0.914949	0.677477	0.445684	0.000994372	0.0287529
cg16578568	16	29757405	C16orf54		0.490438	0.314129	0.197521	0.00114958	0.0314507
cg02319067	16	29757461	C16orf54		0.712797	0.511341	0.291012	0.000208756	0.0100038
cg07835443	16	89734986	C16orf55	chr16:89734985-89735189	0.560655	0.0759001	0.761085	7.52779e-05	0.00482217
cg16725984	16	89735184	C16orf55	chr16:89734985-89735189	0.688921	0.119778	0.860603	1.52234e-05	0.00149725
cg16570414	16	89736790	C16orf55	chr16:89734985-89735189	0.464601	0.805127	0.358012	8.13425e-05	0.00510849
cg06105093	16	19584490	C16orf62		0.862516	0.572076	0.827871	0.00122926	0.0327867
cg04358214	16	67143304	C16orf70	chr16:67143282-67143827	0.058132	0.487183	0.049991	0.000995584	0.0287776
cg10403251	16	9206298	C16orf72		0.415286	0.0654135	0.240763	0.00133944	0.034647
cg27153327	16	1920815	C16orf73	chr16:1921897-1922426	0.246745	0.782408	0.632992	0.000503677	0.018635
cg02956768	16	85775119	C16orf74		0.868487	0.453266	0.877526	7.82319e-05	0.00496674
cg06592080	16	3543548	C16orf90	chr16:3546366-3546769	0.584612	0.865338	0.592422	0.00192481	0.0431647
cg07942687	16	1476899	C16orf91	chr16:1478221-1478812	0.910893	0.847501	0.362815	1.44361e-06	0.000253599
cg01789926	16	1477111	C16orf91	chr16:1478221-1478812	0.660986	0.956899	0.239726	0.00108853	0.0304156
cg08181402	16	1479446	C16orf91	chr16:1480844-1481045	0.293321	0.711734	0.327565	0.000603851	0.0209926
cg07000567	16	1479501	C16orf91	chr16:1480844-1481045	0.206718	0.641156	0.193334	0.000244552	0.0112507
cg06601666	17	80361098	C17orf101	chr17:80361614-80362151	0.904315	0.0953355	0.242857	1.17557e-13	5.27953e-10
cg21525032	17	80372493	C17orf101	chr17:80373276-80373490	0.701192	0.210072	0.181543	5.14231e-05	0.00365819
cg07929164	17	80372499	C17orf101	chr17:80373276-80373490	0.501187	0.0809775	0.0487158	0.000213113	0.0101561
cg19950069	17	80372534	C17orf101	chr17:80373276-80373490	0.588008	0.133149	0.121832	0.00039698	0.0158553
cg00231966	17	80377299	C17orf101;HEXDC	chr17:80376412-80376761	0.724992	0.773153	0.383117	0.000273913	0.0122232
cg15889448	17	42741423	C17orf104		0.772882	0.457045	0.786099	0.000894462	0.026887
cg13923669	17	72948705	C17orf28		0.5828	0.623607	0.13987	0.000137042	0.00745622
cg20805367	17	6918952	C17orf49	chr17:6917569-6918539	0.495714	0.87948	0.520028	0.0020534	0.044804
cg02805822	17	6916868	C17orf49;RNASEK	chr17:6917569-6918539	0.034078	0.0647774	0.027589	0.000523219	0.0191108
cg27543385	17	71800219	C17orf54		0.175525	0.597118	0.169365	0.000808579	0.0252159
cg08348186	17	71817732	C17orf54		0.880157	0.680324	0.867383	0.00109907	0.0305757
cg19159964	17	71824917	C17orf54		0.896375	0.551805	0.828049	5.68254e-05	0.00392266
cg17393016	17	79283390	C17orf55	chr17:79283863-79284131	0.617624	0.130287	0.371019	0.000820537	0.0254734
cg24655262	17	8092054	C17orf59	chr17:8092418-8093706	0.492013	0.19436	0.532664	7.84198e-05	0.00497791
cg00819788	17	7308579	C17orf61	chr17:7307206-7308626	0.0949965	0.299272	0.112502	0.000920134	0.0273312
cg18738545	17	34196756	C17orf66		0.764438	0.616134	0.759485	8.78989e-05	0.00541328
cg12881765	17	48841566	C17orf73		0.789248	0.103668	0.859201	7.76754e-08	2.69468e-05
cg25518968	17	48845009	C17orf73		0.924494	0.59572	0.718329	0.000230907	0.0107705
cg04936619	17	30658537	C17orf75		0.789372	0.859583	0.758078	0.00129927	0.0339957
cg23450399	18	13387423	C18orf1	chr18:13387385-13387686	0.97973	0.982748	0.978963	0.000239765	0.0110811
cg01292175	18	24445240	C18orf16;AQP4	chr18:24443200-24443458	0.859207	0.329982	0.444448	2.40833e-06	0.000376919
cg15201115	18	52257402	C18orf26		0.724582	0.296237	0.557424	0.000622677	0.0213613
cg14535531	18	52258182	C18orf26		0.595909	0.0736836	0.393845	0.00229031	0.0478542
cg01174441	18	52262555	C18orf26		0.543961	0.133235	0.207101	0.00015445	0.00810657
cg18130905	18	30517666	C18orf34		0.173808	0.78001	0.347824	8.54297e-05	0.00530311
cg16206090	18	20916335	C18orf45		0.855071	0.353245	0.843115	1.70658e-07	4.8797e-05
cg04524552	19	4670575	C19orf10	chr19:4669927-4670528	0.0386512	0.0892381	0.0321482	0.00220673	0.0467838
cg07838483	19	30202712	C19orf12	chr19:30206040-30206497	0.856202	0.905619	0.823531	0.00138315	0.035316
cg27304729	19	30205554	C19orf12	chr19:30206040-30206497	0.168436	0.407847	0.208714	0.000217834	0.010331
cg27623214	19	58485726	C19orf18		0.913994	0.934837	0.910051	0.000916583	0.0272708
cg25656098	19	517087	C19orf20	chr19:518847-519905	0.904154	0.715087	0.899676	0.00135895	0.0349486
cg19546012	19	752860	C19orf21		0.424905	0.09776	0.251097	0.000827079	0.0256175
cg14145667	19	909533	C19orf22	chr19:911689-911996	0.284438	0.647687	0.70419	2.41379e-05	0.00210006
cg04581214	19	1267741	C19orf23	chr19:1265854-1269943	0.0773213	0.343008	0.117019	0.00126771	0.0334218
cg08035555	19	3558417	C19orf28	chr19:3556962-3558293	0.419558	0.88534	0.332918	3.26195e-06	0.000475401
cg12202913	19	12846618	C19orf43	chr19:12848278-12848586	0.611943	0.924038	0.82975	0.000591462	0.0206837
cg03743981	19	40850441	C19orf47	chr19:40854180-40854733	0.861084	0.903163	0.845549	0.00224814	0.0473218
cg09397692	19	51304172	C19orf48;SNORD88A	chr19:51307439-51308380	0.832961	0.902592	0.836393	0.000937507	0.0276623
cg10790747	19	36248020	C19orf55;HSPB6	chr19:36248979-36249307	0.0624872	0.199826	0.0614517	0.00022671	0.0106262
cg08615372	19	18699234	C19orf60	chr19:18699422-18700554	0.179297	0.639384	0.272357	0.000420252	0.0165135
cg03414830	19	18699403	C19orf60	chr19:18699422-18700554	0.040995	0.22267	0.0777056	0.00101725	0.0291109
cg19342159	19	18699433	C19orf60	chr19:18699422-18700554	0.0295451	0.289766	0.0346226	0.000303914	0.0131848
cg19492423	19	18700933	C19orf60	chr19:18699422-18700554	0.168018	0.783959	0.208998	1.25554e-07	3.84267e-05
cg18304696	19	10200360	C19orf66	chr19:10196696-10197857	0.877133	0.597564	0.76182	0.0011791	0.0319293
cg22105158	19	3480672	C19orf77	chr19:3481782-3482048	0.479315	0.103723	0.11755	0.00234508	0.0485486
cg17994788	7	7261594	C1GALT1		0.518281	0.893555	0.245525	0.000638861	0.0216949
cg08943180	1	244516022	C1orf100		0.785368	0.2471	0.739344	4.6646e-06	0.000620234
cg21304285	1	244525971	C1orf100		0.563051	0.289903	0.239886	0.00210348	0.0454501
cg19509436	1	244651745	C1orf101		0.850415	0.386776	0.890414	1.78945e-07	5.06756e-05
cg13419869	1	200863686	C1orf106	chr1:200860076-200860576	0.791627	0.204001	0.793804	3.18879e-06	0.000466868
cg18279842	1	200879897	C1orf106	chr1:200880593-200881270	0.926746	0.746567	0.922811	0.00054362	0.0195776
cg01403607	1	162838907	C1orf110		0.748389	0.823213	0.36864	2.02337e-06	0.000330131
cg24003560	1	220863347	C1orf115	chr1:220863507-220864249	0.0818567	0.609491	0.0818413	0.000135676	0.00740627
cg01471713	1	220864279	C1orf115	chr1:220863507-220864249	0.487375	0.741559	0.173155	0.0020742	0.0450766
cg09822482	1	179519214	C1orf125		0.855546	0.397391	0.602587	0.000260628	0.0117895
cg10206452	1	15442301	C1orf126;KIAA1026		0.926569	0.36663	0.89444	1.38013e-05	0.00139014
cg21157465	1	11020631	C1orf127		0.794564	0.924913	0.372982	8.13247e-05	0.00510836
cg01191660	1	11024083	C1orf127		0.453698	0.791663	0.775502	1.01622e-06	0.000193369
cg27631724	1	11040367	C1orf127		0.565658	0.784445	0.330663	7.74284e-05	0.00493049
cg18234296	1	210407896	C1orf133;SERTAD4	chr1:210405952-210407250	0.633104	0.167283	0.634144	0.000135184	0.00738919
cg12304930	1	92683554	C1orf146	chr1:92683438-92683682	0.446994	0.142126	0.450185	4.0094e-05	0.00305869
cg17878878	1	12805288	C1orf158		0.628615	0.154951	0.441326	0.00210105	0.045429
cg09440340	1	116654415	C1orf161		0.377125	0.115465	0.21912	0.000300925	0.0130975
cg05374238	1	57285466	C1orf168		0.762938	0.665651	0.39092	0.000901773	0.0270168
cg17449026	1	75100556	C1orf173		0.90562	0.426251	0.76491	0.000686765	0.0227095
cg03513964	1	75139746	C1orf173		0.0764256	0.50728	0.0709079	0.00116253	0.0316548
cg20314620	1	3816831	C1orf174;LOC100133612	chr1:3816356-3818084	0.0849973	0.164395	0.0995461	0.000349034	0.0145171
cg09753749	1	184359437	C1orf21	chr1:184355415-184356811	0.857008	0.330087	0.868522	2.88888e-06	0.000433726
cg17170133	1	184411563	C1orf21		0.875841	0.409826	0.597279	6.37252e-06	0.000788079
cg01413566	1	43750640	C1orf210		0.505327	0.124163	0.312913	0.000213074	0.0101561
cg09988116	1	43750693	C1orf210		0.411991	0.128442	0.302083	0.00144944	0.0363195
cg20745419	1	151696417	C1orf230	chr1:151693991-151694282	0.826703	0.416333	0.843033	6.56841e-07	0.000138606
cg03200818	1	197871534	C1orf53	chr1:197871588-197872299	0.0431652	0.0429354	0.0645045	0.00109832	0.0305622
cg12578211	1	197875080	C1orf53	chr1:197871588-197872299	0.617303	0.331842	0.315858	0.00188641	0.0426368
cg03603260	1	151021364	C1orf56	chr1:151020162-151020627	0.233359	0.694091	0.360214	0.00111876	0.0309194
cg12100751	1	109203672	C1orf59	chr1:109203593-109204378	0.062139	0.427202	0.115401	0.000559248	0.0199377
cg22902270	1	25573486	C1orf63	chr1:25572966-25574521	0.0442004	0.0508773	0.0311231	0.001068	0.0300383
cg16510654	1	16330625	C1orf64		0.722452	0.825948	0.323972	2.41693e-05	0.00210147
cg00002808	1	223568700	C1orf65	chr1:223566642-223567268	0.930918	0.775119	0.929561	0.00145164	0.03635
cg03315007	1	2137067	C1orf86	chr1:2136808-2137351	0.00921845	0.367502	0.0101727	0.0010947	0.0305219
cg06203364	1	2137307	C1orf86	chr1:2136808-2137351	0.337287	0.947481	0.297743	0.000309236	0.0133412
cg03665132	1	2137325	C1orf86	chr1:2136808-2137351	0.444131	0.853946	0.370274	0.000183466	0.00916943
cg15840005	1	2139905	C1orf86	chr1:2136808-2137351	0.619494	0.204131	0.434735	1.11574e-05	0.00119059
cg10314133	1	2125114	C1orf86;LOC100128003	chr1:2126048-2126642	0.486559	0.797174	0.397481	0.000181243	0.00909134
cg11503104	1	2125122	C1orf86;LOC100128003	chr1:2126048-2126642	0.492049	0.763099	0.377551	0.000183633	0.00917445
cg08933000	1	2125124	C1orf86;LOC100128003	chr1:2126048-2126642	0.507314	0.781263	0.394852	0.000545565	0.0196249
cg07697177	1	2125182	C1orf86;LOC100128003	chr1:2126048-2126642	0.417399	0.849099	0.378253	4.87354e-07	0.000109944
cg16718276	1	2125186	C1orf86;LOC100128003	chr1:2126048-2126642	0.446852	0.918913	0.404963	4.70744e-07	0.000107274
cg18397998	1	2125243	C1orf86;LOC100128003	chr1:2126048-2126642	0.29757	0.647533	0.284779	0.00193647	0.043333
cg13322175	1	60463903	C1orf87		0.908742	0.267162	0.858397	5.02626e-09	3.18792e-06
cg18870231	1	60539135	C1orf87	chr1:60539315-60539540	0.879471	0.643989	0.909721	0.0019402	0.0433815
cg11231291	1	60539932	C1orf87	chr1:60539315-60539540	0.936693	0.491301	0.9277	0.000863382	0.0263174
cg15204286	1	34669017	C1orf94		0.893953	0.666426	0.892069	0.000806173	0.0251713
cg01421119	1	211555733	C1orf97	chr1:211555939-211556332	0.144024	0.782763	0.108441	2.18969e-05	0.00195659
cg23540704	17	43046275	C1QL1	chr17:43044369-43046424	0.358807	0.913474	0.435982	0.00198307	0.0439004
cg17594131	17	43046361	C1QL1	chr17:43044369-43046424	0.435449	0.899328	0.205296	0.00077342	0.0245286
cg14248106	17	43046371	C1QL1	chr17:43044369-43046424	0.381708	0.894445	0.17679	0.000479388	0.0180459
cg27177554	10	16562102	C1QL3	chr10:16561604-16563822	0.66439	0.605991	0.101774	0.00235706	0.0486794
cg07706387	17	77031156	C1QTNF1		0.294206	0.83108	0.638474	0.000232698	0.0108341
cg19619432	5	159797813	C1QTNF2	chr5:159797388-159797697	0.352157	0.731894	0.418201	0.000462784	0.0175794
cg14507146	5	34043333	C1QTNF3		0.531823	0.905089	0.265646	3.11684e-05	0.00254055
cg17617843	5	34043454	C1QTNF3		0.0886572	0.651597	0.0619926	7.12825e-05	0.00463826
cg23051392	5	34043481	C1QTNF3		0.187222	0.86186	0.0976049	4.86114e-07	0.000109897
cg18752880	5	34043509	C1QTNF3		0.0740097	0.358652	0.0520121	0.000796453	0.0249754
cg25106707	4	15341523	C1QTNF7		0.65966	0.0649477	0.524224	0.000334975	0.0140889
cg05003411	4	15428768	C1QTNF7		0.856078	0.410568	0.677906	0.00204159	0.0446552
cg06179228	4	15429515	C1QTNF7		0.755186	0.140296	0.687762	4.63213e-06	0.000617184
cg09250458	16	1139916	C1QTNF8	chr16:1139732-1139937	0.696198	0.0623744	0.0396372	4.9826e-11	7.30032e-08
cg20138486	13	24884072	C1QTNF9	chr13:24882098-24882951	0.666953	0.830866	0.723888	0.000624561	0.0214028
cg02931247	12	7249484	C1RL		0.718634	0.543239	0.739053	0.00156839	0.0381705
cg17368808	20	9496892	C20orf103	chr20:9496471-9496893	0.559104	0.150662	0.248823	0.000824077	0.0255565
cg09732036	20	9511102	C20orf103		0.832869	0.533022	0.601606	0.00104241	0.0295858
cg22460366	20	55108116	C20orf107		0.47239	0.231657	0.724433	0.00132252	0.0343603
cg26858716	20	54942094	C20orf108		0.881113	0.909497	0.857789	0.00111054	0.0307839
cg06466728	20	42825248	C20orf111		0.816493	0.863423	0.418136	7.63992e-06	0.000893724
cg23586440	20	31067009	C20orf112	chr20:31070189-31072676	0.803856	0.661943	0.466349	0.00161505	0.0388778
cg12871687	20	31072777	C20orf112	chr20:31070189-31072676	0.156069	0.401053	0.611558	0.000705512	0.023102
cg11035100	20	31870935	C20orf114		0.443353	0.18941	0.183083	0.00039688	0.0158543
cg23202496	20	35488318	C20orf117	chr20:35491001-35492805	0.829538	0.887444	0.670473	3.66772e-05	0.00285766
cg09241885	20	35504371	C20orf118		0.551163	0.121638	0.220612	0.000991811	0.028701
cg09227119	20	35504403	C20orf118		0.572233	0.0914868	0.200286	0.000324526	0.0137637
cg00414077	20	35504511	C20orf118		0.668172	0.18014	0.314729	0.000111495	0.00641494
cg18062064	20	35504553	C20orf118		0.453359	0.113143	0.208226	0.000539604	0.0194783
cg06723459	20	32253019	C20orf134;NECAB3	chr20:32254811-32255989	0.623188	0.796339	0.785929	0.00130645	0.0341123
cg13236107	20	34556051	C20orf152		0.888157	0.917545	0.870817	0.000427801	0.0166928
cg15423222	20	61162065	C20orf166;MIR133A2		0.954906	0.61574	0.95719	1.90486e-07	5.3395e-05
cg02434703	20	58519170	C20orf177	chr20:58514071-58515636	0.881607	0.915783	0.870747	0.000456222	0.0174231
cg03442592	20	31668141	C20orf186		0.874753	0.905798	0.878229	0.00222175	0.0469985
cg25724895	20	58630390	C20orf197		0.759108	0.80455	0.563576	0.00151007	0.0372504
cg15844191	20	58631001	C20orf197		0.749126	0.263473	0.418725	0.000693957	0.0228576
cg14236389	20	58631038	C20orf197		0.717524	0.357957	0.447536	0.000315834	0.0135144
cg22476268	20	62715760	C20orf201;OPRL1	chr20:62714763-62715761	0.0969395	0.423748	0.152843	0.00163477	0.0391836
cg27404606	20	3747579	C20orf27	chr20:3748053-3749407	0.117655	0.308163	0.141241	0.00093713	0.0276623
cg06937882	20	24974362	C20orf3	chr20:24972665-24973700	0.602807	0.062199	0.804831	0.00105984	0.0299097
cg20649298	20	22545407	C20orf56	chr20:22548967-22549720	0.791632	0.911039	0.341691	2.9286e-06	0.00043798
cg17611686	20	22547532	C20orf56	chr20:22548967-22549720	0.684178	0.891244	0.152058	7.19693e-05	0.00467107
cg01235473	20	22549124	C20orf56	chr20:22548967-22549720	0.161531	0.725591	0.124274	3.28161e-07	8.09482e-05
cg06680481	20	22549253	C20orf56	chr20:22548967-22549720	0.123593	0.763152	0.0667679	2.84966e-07	7.27292e-05
cg07215199	20	22549361	C20orf56	chr20:22548967-22549720	0.062955	0.650565	0.0352954	3.40649e-06	0.000491611
cg22468075	20	22549719	C20orf56	chr20:22548967-22549720	0.0755695	0.691542	0.045146	4.43219e-08	1.73945e-05
cg00933153	20	22550129	C20orf56	chr20:22548967-22549720	0.150456	0.903286	0.0539437	1.6554e-05	0.00159423
cg12179011	20	22560481	C20orf56	chr20:22557517-22559240	0.22867	0.887131	0.0797058	6.50461e-05	0.00432987
cg15511401	20	13798846	C20orf7		0.730229	0.73194	0.581829	0.00216485	0.046264
cg25006249	20	259898	C20orf96	chr20:259789-260148	0.846607	0.911482	0.487815	0.00234594	0.0485523
cg18963171	21	43442940	C21orf121		0.790822	0.413793	0.552016	0.00149547	0.0370167
cg20727124	21	42520659	C21orf130		0.811127	0.196564	0.73298	6.15504e-06	0.000767385
cg14641774	21	34146184	C21orf49	chr21:34143453-34144141	0.748283	0.585553	0.738521	0.000673261	0.0224371
cg11414263	21	47724906	C21orf58	chr21:47722622-47722900	0.923327	0.513712	0.906763	0.000484993	0.018184
cg04970389	21	33982479	C21orf59	chr21:33984367-33985450	0.777356	0.571506	0.771737	3.38545e-05	0.00269453
cg03803086	21	34185960	C21orf62		0.801404	0.312398	0.83643	0.000266946	0.0119966
cg23163200	21	34186122	C21orf62		0.735358	0.288538	0.785506	5.40944e-05	0.00379723
cg14442408	21	33785412	C21orf63	chr21:33783914-33785717	0.0861603	0.236732	0.0874457	0.000658018	0.0220931
cg27544190	21	33785434	C21orf63	chr21:33783914-33785717	0.0537595	0.271762	0.0437938	8.37656e-08	2.86269e-05
cg18638180	21	46379089	C21orf70	chr21:46378278-46378645	0.494369	0.132975	0.798273	0.00176411	0.0409565
cg00331032	22	38339972	C22orf23		0.760151	0.866986	0.41934	0.00131873	0.0342964
cg04002001	22	32329829	C22orf24		0.360378	0.221749	0.516354	0.000949185	0.0278993
cg22319611	22	19840851	C22orf29;GNB1L	chr22:19841883-19843010	0.258443	0.686938	0.396514	6.27296e-05	0.00422006
cg03625762	22	32556223	C22orf42		0.74493	0.909447	0.523851	0.000877804	0.0265859
cg16521629	22	32556608	C22orf42		0.33509	0.797636	0.288557	0.000476583	0.0179813
cg21949305	22	24828655	C22orf45;ADORA2A		0.826928	0.932735	0.493365	0.000517941	0.0189869
cg07795766	22	45608516	C22orf9		0.721048	0.729983	0.144475	0.00148455	0.0368617
cg02541592	22	45608686	C22orf9		0.651862	0.881095	0.232908	0.000850997	0.0260675
cg20078807	22	45608713	C22orf9		0.706486	0.880531	0.272731	0.000100513	0.00596451
cg24352349	22	45597767	C22orf9;MIR1249	chr22:45598721-45599080	0.64166	0.148187	0.561431	0.000181625	0.00910715
cg08200404	15	62359539	C2CD4A	chr15:62359827-62360995	0.0928698	0.569672	0.0548874	0.00147932	0.0367783
cg08203682	15	62359828	C2CD4A	chr15:62359827-62360995	0.0320424	0.319001	0.0274384	0.000702562	0.0230309
cg01184271	15	62457681	C2CD4B	chr15:62456015-62457648	0.637807	0.883764	0.281391	0.000527042	0.0191984
cg10781408	1	151810899	C2CD4D;LOC100132111	chr1:151810460-151811684	0.812853	0.918701	0.422991	0.000657516	0.0220866
cg04296699	1	151810904	C2CD4D;LOC100132111	chr1:151810460-151811684	0.773883	0.87974	0.411853	0.000486943	0.0182245
cg15972984	2	99756731	C2orf15;TSGA10	chr2:99757355-99758220	0.453566	0.837631	0.377664	0.00151937	0.0374265
cg23055682	2	27798724	C2orf16		0.800371	0.339467	0.757253	2.0676e-06	0.000334882
cg21240640	2	27799388	C2orf16		0.913629	0.479005	0.752173	0.000314296	0.0134807
cg10142452	2	27799411	C2orf16		0.847757	0.324497	0.713127	0.000451805	0.0173056
cg04359252	2	26986356	C2orf18	chr2:26987030-26987500	0.819833	0.91551	0.51579	0.000439449	0.0170073
cg04955914	2	220040571	C2orf24	chr2:220041129-220043410	0.428787	0.0774699	0.179745	0.00128656	0.0337787
cg14329045	2	106694419	C2orf40		0.887585	0.683573	0.871038	3.02039e-07	7.58633e-05
cg10334385	2	11272868	C2orf50		0.0599968	0.197346	0.0629505	1.2451e-05	0.00128772
cg04550237	2	27362964	C2orf53		0.856982	0.880748	0.833544	8.62648e-05	0.00533971
cg02820040	2	241836501	C2orf54		0.428509	0.248844	0.221904	0.00126606	0.0334038
cg19055178	2	99536966	C2orf55		0.889341	0.920647	0.889086	0.0017427	0.0406635
cg09236434	2	99553642	C2orf55	chr2:99552185-99553831	0.0479843	0.540084	0.0201101	0.000460406	0.0175197
cg24364967	2	55450577	C2orf63	chr2:55450616-55450931	0.0591878	0.641342	0.0570612	0.000440145	0.0170199
cg02271560	2	55450737	C2orf63	chr2:55450616-55450931	0.0189665	0.562663	0.0199483	0.000785391	0.0247363
cg20042692	2	55450874	C2orf63	chr2:55450616-55450931	0.0220203	0.461447	0.0230451	0.00221088	0.0468477
cg00967637	2	74875932	C2orf65	chr2:74875128-74875562	0.932172	0.948744	0.925379	0.0021034	0.0454501
cg10150686	2	26785332	C2orf70	chr2:26785114-26785687	0.0127932	0.0103802	0.0138333	0.00244347	0.0497519
cg26427115	2	26785891	C2orf70	chr2:26785881-26786101	0.194873	0.652379	0.305167	0.000385486	0.0155724
cg22488717	2	26785946	C2orf70	chr2:26785881-26786101	0.335453	0.826313	0.466887	0.000428261	0.0167085
cg18742855	2	26800399	C2orf70		0.601091	0.262643	0.274036	0.000964928	0.0281856
cg00139455	2	29296783	C2orf71		0.822203	0.569423	0.832573	0.00103413	0.0294219
cg21249563	2	29297717	C2orf71		0.833716	0.283859	0.779803	5.62509e-06	0.000715564
cg12852187	2	231903372	C2orf72	chr2:231902026-231903122	0.757674	0.0729529	0.112947	2.02135e-07	5.58645e-05
cg04706327	2	54557495	C2orf73	chr2:54557630-54558039	0.0430081	0.28924	0.0360724	0.000168291	0.00862561
cg23998903	2	209048830	C2orf80		0.731362	0.0532976	0.327305	3.22416e-06	0.00047077
cg09569569	2	74645769	C2orf81	chr2:74645467-74645750	0.716981	0.814186	0.533126	0.00114827	0.0314447
cg08771694	2	228498941	C2orf83		0.85202	0.450127	0.816815	5.6359e-05	0.0039038
cg00669330	2	242810917	C2orf85	chr2:242808405-242808618	0.38944	0.794499	0.400424	0.000380163	0.0154221
cg11654325	2	242810927	C2orf85	chr2:242808405-242808618	0.124078	0.451084	0.122131	0.00189368	0.0427372
cg18983986	2	63725028	C2orf86		0.781011	0.842492	0.757954	0.0023578	0.0486873
cg22408559	2	191001220	C2orf88		0.747024	0.534291	0.475844	0.00137397	0.0351708
cg22003435	2	191045885	C2orf88	chr2:191044979-191045829	0.0286704	0.0749541	0.0364496	0.0017284	0.040493
cg03664459	2	906167	C2orf90		0.863789	0.441527	0.747305	0.00202773	0.0444767
cg04426779	2	906313	C2orf90		0.828032	0.490423	0.706069	0.00137033	0.0351147
cg17091441	2	906427	C2orf90		0.8921	0.34615	0.793996	6.58024e-09	3.98067e-06
cg14148690	2	906675	C2orf90		0.911236	0.369436	0.81605	0.000149446	0.00792296
cg00138710	2	906974	C2orf90		0.873209	0.590853	0.815026	0.00245832	0.0498904
cg12800939	3	112734980	C3orf17	chr3:112738244-112738653	0.735275	0.286971	0.665203	0.000105579	0.00616534
cg10779423	3	50604763	C3orf18	chr3:50604905-50605359	0.0218301	0.434218	0.0219835	0.000710804	0.0232138
cg15912390	3	194826514	C3orf21		0.781999	0.296739	0.679076	0.00017067	0.00870686
cg21855281	3	99817572	C3orf26;FILIP1L		0.790575	0.889196	0.811424	5.50147e-05	0.0038429
cg02700360	3	11874932	C3orf31		0.856864	0.492649	0.704703	0.00137721	0.0352232
cg22959932	3	8693706	C3orf32		0.852356	0.082553	0.814962	5.24307e-10	5.1213e-07
cg06610172	3	8693749	C3orf32		0.845535	0.0901233	0.39289	1.10111e-07	3.46761e-05
cg01104466	3	8693756	C3orf32		0.723085	0.159744	0.327758	6.3006e-09	3.82832e-06
cg15770125	3	8693781	C3orf32		0.610797	0.129042	0.25959	2.55039e-06	0.000394076
cg02100848	3	8693859	C3orf32		0.579486	0.112252	0.243931	5.03572e-06	0.000657806
cg04538517	3	133649210	C3orf36	chr3:133646094-133646650	0.744971	0.139231	0.456708	0.000221285	0.0104455
cg21633042	3	167980097	C3orf50		0.865811	0.390367	0.739955	0.000314394	0.0134821
cg14321066	3	168115836	C3orf50		0.711489	0.153164	0.483433	1.57873e-06	0.000271901
cg18241469	3	168136028	C3orf50		0.527456	0.0499816	0.236553	0.000234644	0.0109042
cg26311677	3	168142949	C3orf50		0.893938	0.344903	0.768883	1.9625e-05	0.00180461
cg18504196	3	168331449	C3orf50		0.787445	0.302848	0.564309	0.00240784	0.0492701
cg07130714	3	168335941	C3orf50		0.759835	0.367036	0.581603	0.000558832	0.0199341
cg21490751	3	168268421	C3orf50;MIR551B		0.819936	0.246483	0.555769	4.00904e-05	0.00305869
cg21658839	3	168269695	C3orf50;MIR551B		0.906829	0.537647	0.862237	0.00185774	0.042258
cg21572731	3	111804981	C3orf52	chr3:111804865-111805570	0.110697	0.443362	0.125694	0.00243055	0.0495825
cg07758574	3	49314370	C3orf62	chr3:49314437-49314815	0.0266907	0.578266	0.0296685	0.000678613	0.022537
cg20835282	3	49314454	C3orf62	chr3:49314437-49314815	0.0442429	0.593826	0.0419776	0.000671392	0.0223947
cg20603260	3	49314539	C3orf62	chr3:49314437-49314815	0.0339505	0.509823	0.0312464	0.000785983	0.0247447
cg11098493	3	49314595	C3orf62;USP4	chr3:49314437-49314815	0.0317692	0.618256	0.0304073	0.000720855	0.0233967
cg10259735	3	49314633	C3orf62;USP4	chr3:49314437-49314815	0.0309716	0.599267	0.0322447	0.000744698	0.0239259
cg06241292	3	49314636	C3orf62;USP4	chr3:49314437-49314815	0.0428591	0.572407	0.0469249	0.00070291	0.0230405
cg19498237	3	49314655	C3orf62;USP4	chr3:49314437-49314815	0.0343065	0.560188	0.0360009	0.00055184	0.0197717
cg16523704	3	49314670	C3orf62;USP4	chr3:49314437-49314815	0.0505637	0.360608	0.0729429	0.000185272	0.00923066
cg07207099	3	49314736	C3orf62;USP4	chr3:49314437-49314815	0.0306502	0.633722	0.0407809	0.000628302	0.0214687
cg08846852	3	49314814	C3orf62;USP4	chr3:49314437-49314815	0.0947882	0.56267	0.0665359	0.000928781	0.0275062
cg25185947	3	108897005	C3orf66		0.768166	0.302723	0.747723	5.71231e-08	2.14368e-05
cg06028917	3	59035407	C3orf67	chr3:59035406-59035944	0.126622	0.38761	0.133151	0.000844262	0.0259409
cg07612986	3	44283035	C3orf77	chr3:44283239-44283838	0.746554	0.481016	0.738447	0.0022645	0.0475407
cg22830844	3	44283343	C3orf77	chr3:44283239-44283838	0.976341	0.789861	0.981625	0.00109211	0.0304684
cg22491058	1	207277466	C4BPA		0.67812	0.251083	0.586953	0.00192665	0.0431868
cg13521077	4	81260418	C4orf22	chr4:81257040-81257270	0.469224	0.0374591	0.116082	0.00234853	0.0485892
cg19143170	4	81303914	C4orf22	chr4:81307471-81307952	0.65238	0.0603101	0.509958	2.12679e-05	0.00191238
cg13740508	4	81307112	C4orf22	chr4:81307471-81307952	0.791114	0.460073	0.623561	0.00145601	0.0363959
cg24563639	4	81307330	C4orf22	chr4:81307471-81307952	0.949661	0.637307	0.855611	0.00188688	0.0426368
cg15870832	4	81407975	C4orf22		0.766763	0.154335	0.58714	4.75698e-06	0.000629151
cg15299568	4	81449664	C4orf22		0.833637	0.375475	0.675112	0.000375132	0.015284
cg00558031	4	8466291	C4orf23		0.802298	0.415519	0.623163	0.00210593	0.0454845
cg22960952	4	76481169	C4orf26		0.553226	0.470295	0.195962	0.000459881	0.0175119
cg22559319	4	170676570	C4orf27	chr4:170678944-170679255	0.893473	0.511538	0.783189	6.6471e-05	0.00440344
cg19518232	4	120222109	C4orf3	chr4:120221626-120222007	0.0331406	0.0692093	0.0343922	0.00210772	0.045509
cg16092834	4	113066298	C4orf32	chr4:113066470-113067379	0.331625	0.647631	0.37977	0.0017631	0.0409461
cg17127235	4	3250745	C4orf44	chr4:3250627-3251447	0.866813	0.650978	0.829387	0.000560148	0.0199534
cg26343761	4	3254969	C4orf44	chr4:3254957-3255175	0.813429	0.548604	0.847353	0.00168741	0.0399197
cg27319971	4	3255056	C4orf44	chr4:3254957-3255175	0.882863	0.573294	0.889701	0.000768412	0.0244335
cg21135273	4	25916067	C4orf52	chr4:25915352-25915996	0.0426189	0.0705028	0.0431715	0.00185586	0.0422334
cg01843018	9	123813144	C5		0.890437	0.224217	0.838674	9.73574e-11	1.26274e-07
cg10224107	19	47813130	C5AR1		0.308734	0.651699	0.691062	0.000842572	0.0259161
cg04329510	19	47824089	C5AR1		0.455993	0.780706	0.850127	0.00113376	0.0311631
cg26837896	5	111077837	C5orf13		0.736372	0.921176	0.316804	1.32409e-05	0.00134783
cg20442289	5	133305704	C5orf15	chr5:133303986-133304399	0.681225	0.133831	0.317366	8.94272e-05	0.00548461
cg05225461	5	102596755	C5orf30	chr5:102594435-102595550	0.79963	0.277832	0.772961	0.000919702	0.0273223
cg22895198	5	74978020	C5orf37		0.805977	0.6711	0.815802	0.000630696	0.0215256
cg25152909	5	172566090	C5orf41		0.901784	0.703355	0.90445	0.000195384	0.00957854
cg18319967	5	173416427	C5orf47	chr5:173415924-173416586	0.804746	0.479036	0.790092	2.62025e-05	0.00224145
cg00982641	5	169659845	C5orf58	chr5:169659830-169660229	0.928292	0.501258	0.894209	3.56208e-06	0.000507506
cg20758593	5	169659863	C5orf58	chr5:169659830-169660229	0.71064	0.365019	0.77223	0.00071882	0.0233655
cg26724545	5	169659950	C5orf58	chr5:169659830-169660229	0.912469	0.67319	0.879698	0.000767404	0.0244146
cg06012932	6	32274241	C6orf10		0.440917	0.513422	0.810432	0.00242307	0.049474
cg03504446	6	32289980	C6orf10		0.492298	0.245679	0.87067	0.00205633	0.0448351
cg06787924	6	32290491	C6orf10		0.352015	0.175874	0.711439	0.00200074	0.0441049
cg13841783	6	32293117	C6orf10		0.500799	0.399995	0.724806	0.00135114	0.0348308
cg03282991	6	32294260	C6orf10		0.347662	0.119391	0.678183	0.00088413	0.0266916
cg06192961	6	32294470	C6orf10		0.180029	0.0658708	0.425314	0.00010443	0.00611852
cg17039645	6	32294503	C6orf10		0.312838	0.147792	0.748896	9.76876e-07	0.000187709
cg01937212	6	32295097	C6orf10		0.36627	0.170008	0.707554	0.000329616	0.0139282
cg20795701	6	32295229	C6orf10		0.56725	0.253589	0.806109	8.51551e-05	0.00529004
cg01858458	6	32296549	C6orf10		0.603455	0.496528	0.716115	0.00163432	0.0391833
cg00861856	6	32311517	C6orf10		0.350546	0.130058	0.813654	1.64727e-05	0.00158762
cg27064867	6	32314182	C6orf10		0.353042	0.133289	0.815373	3.62976e-05	0.00283771
cg16905004	6	32317028	C6orf10		0.282586	0.376658	0.829803	0.000503255	0.0186253
cg16538674	6	32335060	C6orf10		0.286872	0.199465	0.689851	2.97383e-05	0.00245346
cg19886087	6	32335123	C6orf10		0.341714	0.175696	0.819451	4.16407e-05	0.00314625
cg13318964	6	32337970	C6orf10		0.237058	0.122781	0.660948	0.000204915	0.00987704
cg22863148	6	32339554	C6orf10		0.189105	0.0930741	0.810816	9.3543e-08	3.09445e-05
cg09606840	6	43197544	C6orf108	chr6:43196811-43197340	0.359642	0.720437	0.3019	0.00227092	0.0476289
cg19450119	6	170199865	C6orf122;C6orf208		0.389682	0.141806	0.176539	0.000887688	0.026758
cg15855251	6	170200021	C6orf122;C6orf208		0.780273	0.545549	0.494916	0.00113964	0.0312728
cg21712685	6	35744605	C6orf126	chr6:35744225-35744562	0.0810794	0.460106	0.0526932	0.00201828	0.0443353
cg22987116	6	37461296	C6orf129		0.387877	0.920465	0.493545	0.000136888	0.00745173
cg16332927	6	37461350	C6orf129		0.438119	0.963405	0.523062	1.68532e-06	0.000287029
cg00138325	6	42111924	C6orf132	chr6:42109904-42110361	0.908763	0.811793	0.594404	0.000872593	0.0265005
cg14308107	6	30610775	C6orf134	chr6:30614721-30615643	0.801716	0.437642	0.718957	0.00186632	0.0423693
cg04350136	6	30616105	C6orf136	chr6:30614721-30615643	0.425334	0.130904	0.288969	0.00227698	0.047669
cg16000300	6	48033856	C6orf138	chr6:48036137-48036410	0.770166	0.338558	0.644661	0.00230489	0.0480148
cg04374786	6	53939321	C6orf142		0.905341	0.280255	0.774724	4.18698e-05	0.0031609
cg12183741	6	88031886	C6orf162;GJB7	chr6:88032157-88032429	0.507478	0.810698	0.428433	0.000833786	0.025759
cg05621516	6	99728990	C6orf168		0.768274	0.243769	0.6267	0.000330439	0.0139444
cg20229609	6	126660872	C6orf173	chr6:126661135-126661387	0.77602	0.264223	0.51234	0.00189299	0.0427259
cg21286701	6	127798974	C6orf174	chr6:127796286-127797356	0.897897	0.0857003	0.255821	1.73441e-14	1.19436e-10
cg18109571	6	127835189	C6orf174	chr6:127835928-127836255	0.837348	0.282904	0.441553	2.71919e-06	0.000413264
cg08886973	6	166402416	C6orf176;LOC441177	chr6:166401526-166402659	0.0446114	0.348633	0.0357937	0.00142164	0.0358764
cg06545143	6	166402638	C6orf176;LOC441177	chr6:166401526-166402659	0.0769529	0.462879	0.0715271	0.00103869	0.0295058
cg04387240	6	166402699	C6orf176;LOC441177	chr6:166401526-166402659	0.166258	0.655618	0.237399	0.00136809	0.0350784
cg22410478	6	110678956	C6orf186	chr6:110678854-110679108	0.0505561	0.535728	0.0287433	0.000834349	0.0257706
cg16655765	6	110680256	C6orf186	chr6:110678854-110679108	0.256171	0.914208	0.696509	2.26469e-05	0.00200625
cg22102078	6	130182512	C6orf191		0.259259	0.882959	0.355262	0.000156645	0.00818437
cg00483640	6	2623483	C6orf195		0.811875	0.207386	0.712587	0.00159685	0.0385991
cg03290281	6	2632607	C6orf195	chr6:2634372-2634945	0.803848	0.329054	0.835649	0.00031275	0.0134423
cg05426299	6	2636736	C6orf195	chr6:2634372-2634945	0.358302	0.0987904	0.339958	0.00120431	0.0323489
cg01019344	6	118822131	C6orf204;BRD7P3		0.895186	0.70715	0.784752	6.96285e-05	0.00456289
cg25360181	6	43970084	C6orf223	chr6:43970073-43970922	0.180403	0.911628	0.0471749	0.000100821	0.00597828
cg25964534	6	31731300	C6orf26		0.822423	0.918192	0.479964	0.00183445	0.0419447
cg05239811	6	31734147	C6orf27		0.682796	0.805008	0.320641	8.12901e-05	0.00510836
cg13187827	6	31734192	C6orf27		0.636921	0.804933	0.300109	0.000533055	0.0193151
cg19593741	6	31734217	C6orf27		0.754453	0.892781	0.375882	0.000165861	0.00854271
cg25264948	6	31734232	C6orf27		0.551799	0.713814	0.260033	0.000233545	0.0108678
cg10095777	6	31734292	C6orf27		0.716208	0.820002	0.357867	0.000806643	0.0251796
cg23287992	6	31734390	C6orf27		0.656049	0.854238	0.308588	0.000390435	0.015694
cg25641533	6	31734580	C6orf27		0.61036	0.690901	0.313246	0.000550433	0.0197401
cg10515180	7	40583939	C7orf10		0.908544	0.120126	0.664206	7.37461e-08	2.58221e-05
cg12494603	7	40755270	C7orf10		0.818302	0.296203	0.547611	9.99096e-07	0.000190847
cg21326613	7	40786160	C7orf10		0.860136	0.0907573	0.40561	7.24527e-09	4.25223e-06
cg26031288	7	40787015	C7orf10		0.853148	0.285974	0.652951	0.000832919	0.0257437
cg18175518	7	40795696	C7orf10		0.864278	0.219956	0.594958	0.000109786	0.00635027
cg05769505	7	40819169	C7orf10		0.826381	0.169397	0.552573	0.000148451	0.00788995
cg00833639	7	40873953	C7orf10		0.847371	0.293971	0.659957	0.00130038	0.03401
cg04866380	7	31725973	C7orf16		0.82943	0.279405	0.626649	4.87898e-06	0.000642818
cg24580076	7	915073	C7orf20	chr7:915753-916644	0.161208	0.777142	0.136148	1.03159e-05	0.00112254
cg07243405	7	915203	C7orf20	chr7:915753-916644	0.475209	0.948236	0.474965	0.000390072	0.0156885
cg24902995	7	922165	C7orf20		0.980348	0.986089	0.980561	0.00217965	0.0464519
cg00286701	7	2583402	C7orf27	chr7:2583206-2583542	0.843688	0.887222	0.834314	0.000242943	0.0111942
cg25610200	7	142636371	C7orf34		0.767446	0.405511	0.768105	0.000445293	0.0171467
cg13932916	7	39606965	C7orf36	chr7:39605776-39606376	0.487258	0.832923	0.356861	0.00113195	0.0311285
cg24603113	7	1105321	C7orf50	chr7:1105259-1105974	0.403494	0.813525	0.288484	0.000700533	0.0229881
cg20934096	7	1117418	C7orf50	chr7:1119980-1120248	0.916336	0.487296	0.886652	0.00134476	0.0347218
cg12633817	7	1117479	C7orf50	chr7:1119980-1120248	0.598664	0.233232	0.552173	0.000240106	0.0110894
cg08137085	7	1117540	C7orf50	chr7:1119980-1120248	0.905127	0.445832	0.862864	0.000454047	0.0173705
cg02955354	7	1135879	C7orf50	chr7:1135744-1135992	0.669774	0.24998	0.472417	0.0015863	0.0384479
cg07242429	7	1141341	C7orf50	chr7:1141229-1141545	0.899245	0.681321	0.863302	0.000183461	0.00916943
cg00850332	7	1141971	C7orf50	chr7:1142631-1142862	0.90604	0.558092	0.829215	0.00133323	0.0345428
cg18297960	7	1142765	C7orf50	chr7:1142631-1142862	0.292598	0.741139	0.246353	0.0010503	0.029715
cg14236519	7	1152144	C7orf50	chr7:1149179-1150306	0.797548	0.900425	0.452379	0.00117836	0.0319111
cg16284684	7	1164063	C7orf50		0.846205	0.917262	0.81264	0.000950805	0.027917
cg27203184	7	100081966	C7orf51	chr7:100080693-100081371	0.109737	0.620777	0.113052	3.4486e-09	2.35907e-06
cg06644051	7	100816459	C7orf52	chr7:100815484-100816995	0.0849517	0.35488	0.106918	0.000369928	0.0151347
cg22117014	7	120662793	C7orf58		0.849568	0.892477	0.655031	0.00164466	0.0393408
cg14463461	7	92161607	C7orf64	chr7:92157487-92158405	0.835818	0.695951	0.509363	0.000296029	0.0129398
cg07880727	7	47846424	C7orf69;PKD1L1		0.834584	0.331268	0.770549	2.04388e-06	0.000332615
cg02185971	7	6388334	C7orf70	chr7:6388210-6388743	0.141872	0.218498	0.124898	0.00154924	0.0378881
cg13345209	7	26676482	C7orf71		0.901251	0.926722	0.896422	0.00115325	0.031506
cg13125627	8	40010631	C8orf4		0.61261	0.051675	0.155943	0.00031077	0.0133878
cg21189492	8	42395162	C8orf40;SLC20A2	chr8:42396235-42397195	0.891079	0.88133	0.592696	0.00045008	0.0172667
cg11755107	8	33371996	C8orf41	chr8:33371897-33372526	0.0198272	0.353566	0.0196229	0.00235294	0.0486318
cg06239143	8	67588502	C8orf44		0.823803	0.884065	0.796185	0.000104226	0.00611352
cg06890415	8	67405405	C8orf46		0.700052	0.514297	0.251522	0.00197615	0.0438318
cg08515284	8	67417589	C8orf46	chr8:67417588-67417876	0.766229	0.455372	0.562826	0.000705428	0.023102
cg15798873	8	67417740	C8orf46	chr8:67417588-67417876	0.952927	0.690265	0.922936	0.000592203	0.0206973
cg26761826	8	67419572	C8orf46	chr8:67417588-67417876	0.754114	0.300924	0.494673	0.0016134	0.0388584
cg12897502	8	67425316	C8orf46		0.889001	0.621508	0.872979	0.000185877	0.00925521
cg13159388	8	144451643	C8orf51;RHPN1	chr8:144450376-144451557	0.18077	0.0750001	0.43926	0.00198989	0.0439666
cg11988591	8	144451909	C8orf51;RHPN1	chr8:144450376-144451557	0.153501	0.0348051	0.520871	0.000148191	0.00788013
cg19216211	8	22455986	C8orf58	chr8:22456091-22456508	0.299345	0.754763	0.575711	9.4574e-06	0.00105155
cg00992153	8	22456121	C8orf58	chr8:22456091-22456508	0.0199369	0.14213	0.0412327	0.00135929	0.0349532
cg03220354	8	144650176	C8orf73	chr8:144651572-144652288	0.811406	0.878052	0.798308	0.00158957	0.038491
cg15857329	8	144653570	C8orf73	chr8:144653774-144653976	0.095837	0.50539	0.227964	0.000261267	0.0118081
cg14809332	8	144654887	C8orf73	chr8:144653774-144653976	0.156009	0.550339	0.160622	0.00207427	0.0450766
cg24351694	8	144655447	C8orf73	chr8:144653774-144653976	0.337863	0.795408	0.605059	0.000134604	0.00736138
cg25663892	8	10553728	C8orf74		0.517824	0.167919	0.494233	6.33076e-05	0.00424561
cg01962989	8	93933251	C8orf83		0.912972	0.931327	0.913214	0.00237906	0.0489292
cg02157224	8	38368889	C8orf86		0.924188	0.296792	0.821554	8.83921e-09	4.92203e-06
cg26185500	8	38371413	C8orf86		0.863798	0.416976	0.626093	0.000206649	0.0099386
cg14195974	9	131037358	C9orf119;GOLGA2	chr9:131037591-131038695	0.239033	0.533551	0.215191	9.21423e-05	0.00560115
cg01126560	9	139886304	C9orf142	chr9:139886312-139887180	0.505557	0.910072	0.506196	0.000983015	0.0285202
cg13825112	9	34726950	C9orf144B		0.831031	0.51817	0.704262	0.0024403	0.0497226
cg00845368	9	97572553	C9orf3		0.931883	0.901609	0.93062	0.00053678	0.0194003
cg13837449	9	97648256	C9orf3		0.615451	0.24694	0.323649	1.51216e-05	0.00149007
cg14276379	9	97663142	C9orf3		0.764573	0.19853	0.806055	3.39148e-05	0.00269724
cg14503441	9	97758396	C9orf3		0.215735	0.0786204	0.0909012	0.000564104	0.0200373
cg14582550	9	97786879	C9orf3		0.625284	0.0545974	0.0822781	0.000168742	0.00864159
cg14375632	9	97804001	C9orf3	chr9:97807450-97807694	0.748764	0.112491	0.25399	1.13276e-07	3.54569e-05
cg01993208	9	97808906	C9orf3	chr9:97810765-97811272	0.734468	0.258015	0.370419	0.00229314	0.0478834
cg13853813	9	97844901	C9orf3	chr9:97848140-97848525	0.780756	0.479918	0.471503	8.28182e-05	0.0051776
cg14025883	9	5436224	C9orf46	chr9:5437566-5437996	0.857968	0.527904	0.876288	2.50708e-08	1.11865e-05
cg13723983	9	132383362	C9orf50	chr9:132382432-132383004	0.348305	0.92127	0.474438	2.02123e-06	0.000329958
cg02514559	9	74675332	C9orf57		0.835825	0.337013	0.750094	0.00021256	0.0101414
cg02654291	9	86572014	C9orf64	chr9:86571047-86572027	0.112771	0.484003	0.106302	0.00206381	0.0449272
cg13696752	9	4662858	C9orf68;PPAPDC2	chr9:4662252-4662951	0.139056	0.33418	0.157674	0.000972773	0.0283406
cg27204993	9	4662937	C9orf68;PPAPDC2	chr9:4662252-4662951	0.158417	0.386669	0.155189	3.71378e-05	0.0028805
cg10880928	9	139715701	C9orf86	chr9:139715663-139716441	0.832817	0.914679	0.614976	8.76273e-05	0.00540058
cg14224203	9	139716026	C9orf86	chr9:139715663-139716441	0.73324	0.891865	0.406913	1.33731e-05	0.00135693
cg15032615	9	139716215	C9orf86	chr9:139715663-139716441	0.714043	0.792414	0.367852	7.689e-06	0.00089794
cg21175873	9	139735338	C9orf86	chr9:139733690-139733956	0.533453	0.294402	0.521339	0.000954382	0.0279784
cg14082075	9	135644622	C9orf98	chr9:135645441-135646092	0.113329	0.419703	0.0930182	0.000357701	0.0147808
cg18803896	8	86251915	CA1		0.83899	0.534322	0.861651	3.97114e-06	0.000552451
cg27589731	1	150229143	CA14		0.111608	0.51743	0.126836	8.05399e-05	0.00507738
cg20791007	1	150229443	CA14		0.454717	0.829045	0.52603	0.00129764	0.0339661
cg24637974	8	86353723	CA3	chr8:86350765-86351196	0.873636	0.616425	0.857957	0.000156267	0.00816563
cg07497911	16	66878193	CA7	chr16:66878172-66879072	0.0758511	0.266382	0.0771202	0.0014469	0.0362844
cg06524479	16	66878676	CA7	chr16:66878172-66879072	0.0299883	0.0399796	0.0260134	0.00123203	0.0328162
cg21633026	8	61119660	CA8		0.617148	0.408833	0.630544	0.00111975	0.0309302
cg26993311	8	61187240	CA8		0.27126	0.892973	0.408188	0.000459772	0.0175114
cg01618923	13	49883335	CAB39L		0.825967	0.306554	0.818062	1.30581e-08	6.72729e-06
cg00786909	1	227163427	CABC1	chr1:227163739-227164237	0.875979	0.437274	0.573858	0.000209179	0.0100193
cg06230674	18	20716991	CABLES1	chr18:20714968-20717071	0.628983	0.0822434	0.315343	1.80694e-05	0.00170453
cg26052586	18	20717411	CABLES1	chr18:20714968-20717071	0.855074	0.256323	0.821287	4.16872e-06	0.000572057
cg18793086	18	20735005	CABLES1		0.868779	0.223479	0.628828	1.5439e-07	4.50497e-05
cg07716322	18	20735934	CABLES1		0.760344	0.847995	0.780827	0.00199281	0.0440146
cg17770096	12	121078022	CABP1	chr12:121078161-121079483	0.148436	0.551663	0.117468	1.14341e-06	0.000211653
cg00113951	12	121078090	CABP1	chr12:121078161-121079483	0.0595021	0.343756	0.0592858	4.947e-08	1.91564e-05
cg19425431	12	121078196	CABP1	chr12:121078161-121079483	0.0515827	0.403782	0.0593688	1.6576e-07	4.7727e-05
cg23829447	12	121078214	CABP1	chr12:121078161-121079483	0.0596065	0.0985718	0.0586853	0.000773666	0.0245326
cg17118599	12	121079482	CABP1	chr12:121078161-121079483	0.100557	0.448043	0.252123	0.000410087	0.0162188
cg07357346	12	121079543	CABP1	chr12:121078161-121079483	0.338059	0.741437	0.68591	8.88923e-05	0.00546255
cg18477009	12	121087777	CABP1		0.530903	0.872201	0.622228	0.000805436	0.025154
cg05899064	11	67225897	CABP4		0.944504	0.921866	0.94482	0.000371748	0.0151911
cg23280627	22	30115203	CABP7	chr22:30116081-30117160	0.260466	0.690162	0.31001	2.34264e-07	6.26892e-05
cg10348376	22	30117734	CABP7	chr22:30116081-30117160	0.27308	0.936189	0.656829	1.40551e-05	0.00141021
cg00012238	18	21718458	CABYR	chr18:21718862-21719550	0.272668	0.763572	0.200956	1.0712e-09	9.22073e-07
cg17181043	1	64961535	CACHD1		0.324219	0.897117	0.253368	0.00090268	0.0270265
cg25210796	1	65089808	CACHD1		0.294489	0.86864	0.204733	3.67056e-06	0.000519024
cg17742051	19	13321231	CACNA1A	chr19:13319268-13319789	0.769444	0.207506	0.598521	0.000952307	0.0279433
cg07857267	19	13396918	CACNA1A	chr19:13397418-13397645	0.8502	0.490953	0.73344	0.00177619	0.0411459
cg05366189	19	13397419	CACNA1A	chr19:13397418-13397645	0.840139	0.486225	0.821569	2.71156e-05	0.00229799
cg20716703	19	13397750	CACNA1A	chr19:13397418-13397645	0.862699	0.478484	0.866566	1.78565e-05	0.00169063
cg06500096	19	13405582	CACNA1A	chr19:13409561-13410131	0.843298	0.130784	0.734125	1.45316e-09	1.17549e-06
cg12581769	19	13412999	CACNA1A	chr19:13409561-13410131	0.727243	0.375838	0.651702	9.14412e-05	0.00557008
cg02637414	19	13613091	CACNA1A	chr19:13616752-13617267	0.780744	0.257283	0.566044	0.000218667	0.0103569
cg00350503	19	13613614	CACNA1A	chr19:13616752-13617267	0.845336	0.108876	0.621516	3.09917e-05	0.00253083
cg25715134	19	13614358	CACNA1A	chr19:13616752-13617267	0.869888	0.485281	0.81768	0.00186608	0.0423661
cg25766748	19	13614882	CACNA1A	chr19:13616752-13617267	0.84938	0.4962	0.843572	1.56242e-05	0.00152642
cg10243075	19	13615439	CACNA1A	chr19:13616752-13617267	0.888868	0.266452	0.879085	7.77782e-07	0.000157405
cg03104569	19	13615864	CACNA1A	chr19:13616752-13617267	0.735033	0.269925	0.646699	7.55691e-06	0.000887783
cg20669572	9	140773483	CACNA1B	chr9:140771300-140773513	0.326099	0.851632	0.721467	1.82789e-05	0.00172076
cg11827453	9	140917413	CACNA1B	chr9:140917284-140918052	0.0799431	0.454511	0.0670118	1.34008e-08	6.87813e-06
cg02483462	9	140939579	CACNA1B	chr9:140941308-140941526	0.397343	0.764254	0.509642	0.000961315	0.0281102
cg07982825	9	141014674	CACNA1B	chr9:141014643-141014870	0.7954	0.553893	0.709044	0.000909558	0.0271483
cg17401938	12	2228442	CACNA1C	chr12:2224409-2224645	0.862335	0.901847	0.87054	0.0024111	0.0493172
cg13373757	12	2263558	CACNA1C		0.677029	0.216716	0.61268	1.13425e-05	0.00120536
cg11830694	12	2289797	CACNA1C		0.831319	0.896286	0.808442	0.000234276	0.0108944
cg24287125	12	2692308	CACNA1C		0.0937426	0.611827	0.117417	6.22873e-06	0.000774003
cg24831391	12	2743145	CACNA1C		0.969027	0.567345	0.968549	0.000900459	0.0269972
cg14395444	12	2800182	CACNA1C	chr12:2800139-2801062	0.42929	0.950052	0.555325	0.00132649	0.034431
cg13647052	12	2800382	CACNA1C	chr12:2800139-2801062	0.267959	0.618919	0.219735	0.000298265	0.0130216
cg02794451	12	2800446	CACNA1C	chr12:2800139-2801062	0.341643	0.914872	0.368742	0.000394325	0.0157828
cg15442907	12	2800463	CACNA1C	chr12:2800139-2801062	0.355747	0.9271	0.424939	7.11494e-05	0.00463241
cg05166022	12	2800471	CACNA1C	chr12:2800139-2801062	0.285603	0.845443	0.292765	2.65841e-06	0.000405956
cg15279308	12	2800500	CACNA1C	chr12:2800139-2801062	0.379744	0.905732	0.548151	0.000954807	0.0279849
cg19200285	12	2800755	CACNA1C	chr12:2800139-2801062	0.301302	0.716773	0.293866	0.000447923	0.0172063
cg12350325	12	2800909	CACNA1C	chr12:2800139-2801062	0.352069	0.845479	0.335421	3.51535e-06	0.000502233
cg00848945	12	2800919	CACNA1C	chr12:2800139-2801062	0.272117	0.952484	0.257973	1.28726e-05	0.00131944
cg17902551	12	2801061	CACNA1C	chr12:2800139-2801062	0.328444	0.814378	0.335226	0.000601759	0.0209498
cg26265279	3	53566044	CACNA1D		0.467514	0.907246	0.316365	0.000185595	0.00924452
cg04902729	1	181452707	CACNA1E	chr1:181452706-181453073	0.541321	0.0910238	0.0579823	0.00199883	0.0440817
cg17987176	1	181452839	CACNA1E	chr1:181452706-181453073	0.572535	0.120397	0.0458908	0.000575215	0.020315
cg06987672	1	181453051	CACNA1E	chr1:181452706-181453073	0.66728	0.163238	0.126027	8.60657e-05	0.00533058
cg17143291	1	181458839	CACNA1E	chr1:181454974-181455261	0.596268	0.068141	0.239444	9.15818e-05	0.0055761
cg08903425	1	181552984	CACNA1E		0.60627	0.0791415	0.209019	0.00140776	0.0356666
cg04858536	1	181558481	CACNA1E		0.843478	0.133281	0.701042	8.36434e-06	0.000957201
cg11388802	1	181577847	CACNA1E		0.839533	0.32607	0.629073	0.000391583	0.015718
cg18761813	1	181644542	CACNA1E		0.742235	0.246242	0.542218	0.000227222	0.0106397
cg14528916	1	181716263	CACNA1E		0.850466	0.263817	0.664395	0.00184282	0.0420528
cg05118455	1	181764147	CACNA1E	chr1:181767493-181767893	0.857256	0.390126	0.74058	0.000403094	0.016021
cg16898334	1	181767774	CACNA1E	chr1:181767493-181767893	0.849446	0.321394	0.769791	0.000562899	0.0200134
cg24302133	1	181770173	CACNA1E	chr1:181767493-181767893	0.832552	0.390199	0.731761	0.00218263	0.0464899
cg26639906	17	48680554	CACNA1G	chr17:48680336-48680555	0.903014	0.892012	0.665872	0.000221272	0.0104455
cg17315604	22	40043874	CACNA1I	chr22:40045535-40045961	0.835499	0.488266	0.794385	0.000472239	0.0178532
cg17610933	22	40051596	CACNA1I		0.48076	0.771258	0.710102	0.00032616	0.0138189
cg20683057	22	40054124	CACNA1I	chr22:40057941-40058844	0.584802	0.226133	0.531588	0.000367946	0.015076
cg26950953	22	40054572	CACNA1I	chr22:40057941-40058844	0.731655	0.168742	0.397916	0.000570621	0.0201938
cg02041885	22	40073448	CACNA1I	chr22:40075077-40075307	0.707611	0.408448	0.74715	0.000843221	0.0259264
cg01866770	22	40079107	CACNA1I	chr22:40081519-40082390	0.888145	0.653262	0.879887	0.0018327	0.0419378
cg18445088	22	40081812	CACNA1I	chr22:40081519-40082390	0.608644	0.140706	0.564964	0.000506236	0.0187005
cg00127781	3	50409882	CACNA2D2		0.652855	0.60406	0.366191	7.1795e-05	0.00466268
cg21743307	3	54159139	CACNA2D3	chr3:54155239-54157025	0.801696	0.143659	0.784727	1.32123e-10	1.65424e-07
cg00309313	3	54634169	CACNA2D3		0.878143	0.927105	0.78774	0.000707244	0.0231392
cg07077221	3	54673387	CACNA2D3;HESRG		0.536643	0.715625	0.322687	0.0011577	0.0315783
cg05169846	12	1905735	CACNA2D4	chr12:1905277-1906765	0.136788	0.538211	0.0970462	1.68739e-05	0.00161948
cg24510285	12	1948648	CACNA2D4		0.822952	0.498644	0.679862	0.000869065	0.0264318
cg18167759	12	2017746	CACNA2D4	chr12:2017133-2018161	0.884459	0.933794	0.822679	3.50409e-05	0.00276721
cg01214459	12	1938156	CACNA2D4;LRTM2		0.231808	0.913224	0.292217	4.41122e-08	1.73417e-05
cg06937491	12	1943722	CACNA2D4;LRTM2		0.979587	0.84411	0.965137	0.00128275	0.0337057
[truncated: 18,402 more rows]
