# Supplementary material for: Integrative Genomic Characterization Identifies Molecular Subtypes of Lung Carcinoids
Source: Oxford University Press journal article supplement (doi:10.1158/0008-5472.can-19-0214), 2019-07-12
Supplement: 00085472can190214-sup-215659_2_supp_5607913_pt5540.xlsx [file 00085472can190214-sup-215659_2_supp_5607913_pt5540.xlsx]

## Sheet: LCs gene signatures
Supplementary File 5: Top 100 variable gene across all samples asLCs gene signature
LCs top 100 genes classifier gene
GENE
GRP
TTR
GC
SFTPC
GHRH
APOH
CARTPT
TRH
DLK1
TM4SF5
ASCL1
OTP
SFTPB
BPIFA1
PPP1R17
RDH12
MIAT
SFTPA2
SCGB1A1
FEV
TFF1
TM4SF4
NEFL
SFTPA1
HMGCS2
SLC6A5
CALCA
SYT1
MSMB
LECT1
EPS8L3
CFC1B
RPRM
GFRA3
VIL1
PCK1
CRYM
AGR2
SCGB3A2
DIRAS3
SERPINA1
MT1G
GP2
XIST
AZGP1
IGLL5
SOD3
GHSR
HPN
FGA
ALDH1A1
SLC26A9
KRT7
IGJ
FGB
HGD
SERPINF2
SEZ6L
VTN
CGA
NPW
RAMP1
NR0B1
MEG3
SST
DRD2
SLC35D3
SERPINA6
SCGB3A1
MGST1
MUC13
NKX2-1
CABP7
CDHR5
MB
SMOC1
CXCL13
MT1H
STMN2
NPTX1
KIF12
NOS1
DPP4
COL22A1
GLYATL3
C2CD4B
TMEM114
LPL
SLC32A1
BMPR1B
HNF4A
CDH17
PITX1
PHACTR3
GDF10
ADCYAP1
SPHKAP
CEACAM1
KRT19
CRYBA2

## Sheet: Discovery data gene expressions
Supplementary File : Top 100 variable gene across all samples
LCs top 100 genes classifier gene expression for all lung carcinoids samples
GENE	Lu.ty2	Lu.Aty3	Lu.Aty4	Lu.ty3	Lu.Aty5	Lu.Aty6	Lu.ty4	Lu.ty5	Lu.ty6	Lu.Aty7	Lu.ty7	Lu.Aty8	Lu.ty8	Lu.ty9	Lu.Aty9	Lu.Aty10	Lu.Aty11	Lu.Aty12	Lu.ty10	Lu.ty11	Lu.ty12	Lu.ty13	Lu.ty14	Lu.ty15	Lu.ty16	Lu.ty17	Lu.Aty13	Lu.ty1	Lu.Aty1	Lu.Aty2
GRP	1.07039	12.5696	6.87553	13.5023	1.32769	8.07425	2.7761	7.45984	1.52607	12.77	10.1729	12.4761	14.6167	1.95977	0.933573	1.12433	1.15056	14.4016	13.8876	7.04756	2.65535	1.48543	10.7959	10.7935	5.75007	1.15056	14.3499	1.56071	10.0588	1.28688
TTR	8.93555	3.49442	3.70044	2.10098	12.0235	1.25701	10.4416	1.93734	12.558	0.970854	1.66448	0.799087	0.925999	2.10769	10.5483	13.0501	11.363	0.536053	4.51159	10.1471	13.2488	10.3829	1.02857	1.99639	12.1653	13.5859	2.36737	12.9255	1.28096	2.854
GC	1.37851	0.687061	0.0840643	0.15056	9.58229	0.15056	9.99852	0.782409	6.02436	0.31034	0.565597	2.3505	0.321928	0.526069	11.0116	11.4286	9.70086	0.163499	0.189034	4.76447	11.9041	12.4837	0.722466	0.378512	8.51743	11.4913	0.831877	4.79286	0.0703893	2.66221
SFTPC	1.13093	12.4816	1.30451	1.73552	7.35147	6.79883	1.25096	1.82782	1.03562	0.0703893	1.5656	0.713696	5.04963	11.1982	0.124328	11.4249	0.0703893	0.411426	2.68706	3.72465	0.124328	0.238787	3.59335	0.263034	0.226509	1.04264	7.80787	0.9855	8.732	16.0226
GHRH	11.9626	9.61193	3.93263	2.07724	2.22033	6.48317	9.15348	6.72178	16.8445	0.475085	3.9486	0.333424	0.356144	0.163499	0.201634	0	0.344828	1.32193	0.526069	0.790772	9.80429	0.790772	4.87184	1.48543	10.7267	0.400538	5.61941	1.80735	5.00764	1.45943
APOH	5.87406	1.94486	0	0	9.38388	0.263034	4.79442	0.163499	5.99977	0.454176	0.722466	0.0565835	0.214125	1.63691	10.8473	11.9249	11.3897	0.0426443	0.226509	8.07371	8.8933	8.6953	0.356144	0.163499	8.48659	11.1735	0.757023	3.57168	0.475085	2.95977
CARTPT	9.33764	6.62381	1.58496	3.90497	10.1932	2.31325	7.25776	11.1083	12.7141	1.81558	2.01078	4.06437	2.6893	13.6291	10.7005	9.87888	12.2434	0.910733	2.95791	4.8846	4.99367	0.963474	4.40122	5.75087	10.336	16.3032	5.74147	9.60764	1.65992	4.89191
TRH	0.214125	11.6556	0.704872	9.59636	0.163499	1.89918	0.111031	4.72083	0.0840643	2.80529	10.5749	2.46989	0.565597	0.226509	0.163499	0.286881	0.124328	0.263034	11.36	0.0840643	0.238787	0.111031	8.02558	11.0047	0.0285692	0.137504	5.88996	0.0426443	9.55161	0.15056
DLK1	11.5438	10.4387	11.7764	11.0866	2.80116	8.69453	4.3799	7.46066	11.5929	12.9705	6.36947	3.75809	3.33914	6.64674	1.43829	2.3978	5.09761	8.2988	10.3356	10.6741	9.38612	0.887525	10.5118	10.5899	13.138	0.604071	9.13386	0.454176	8.24826	0.422233
TM4SF5	8.46422	0	0.163499	0.163499	7.19111	0.650765	8.9663	0.201634	10.3279	0	0.124328	0.189034	0.286881	0.176323	2.66221	8.49633	5.68117	0.226509	0.31034	8.73691	9.61489	8.87998	0.201634	0.613532	8.49534	5.9528	0.495695	10.0723	0.201634	0.31034
ASCL1	0.263034	8.6189	8.07831	7.8947	0.0840643	8.61408	0.695994	8.07938	0.0976108	9.52529	7.08044	8.12608	8.55371	1.23879	0.226509	0.163499	0.0426443	9.15957	7.96942	0.454176	0.0840643	0.250962	7.8233	8.26641	0.992768	0.847997	9.20462	0.124328	8.43729	0.0426443
OTP	9.26372	8.95632	9.68171	9.45481	0.356144	9.34946	9.30017	9.7747	9.38011	8.41397	10.0464	7.17033	7.65635	0.0426443	0.226509	0.214125	0.15056	8.07248	9.05767	9.49665	9.19813	8.79669	9.8121	9.38918	9.1219	0.0840643	9.55785	0.176323	10.072	0.176323
SFTPB	0.422233	11.407	5.83441	2.926	6.02059	9.70767	0.286881	0.678072	0.286881	1.23879	0.970854	3.53232	5.7952	9.04595	0.0703893	9.39904	0.124328	0.765535	1.50589	2.7137	0.111031	0.0840643	8.38634	0.632268	0.0143553	0.0703893	6.93463	0.250962	6.72533	13.4309
BPIFA1	10.4383	7.24764	1.55582	0.0565835	0.137504	0.575312	10.2827	7.56102	10.2844	0.286881	9.08924	0.321928	0.823749	5.75462	0	0.0565835	0	0.0976108	0.823749	10.0639	10.5136	4.75061	2.43829	1.26303	7.44004	0.0976108	5.36632	0.189034	2.31034	0.201634
PPP1R17	0.0976108	8.76772	5.02015	5.38059	0.0976108	8.64303	0.0565835	0.722466	0.0840643	9.81245	9.64632	8.33418	8.4707	0.0285692	0.0703893	0.0840643	0.0976108	5.78241	8.76325	0.0840643	0.0840643	0.0976108	8.65614	6.51017	0	0.0285692	7.15086	0.124328	7.48309	0.286881
RDH12	9.81826	2.0635	0.594549	1.03562	4.64039	0.713696	10.3546	0.604071	10.1179	0.584963	0.815575	0.823749	0.432959	0.238787	1.70487	2.49825	5.86617	0.333424	1.1375	9.64216	9.59277	11.2054	0.669027	0.713696	10.0405	2.70487	0.956057	7.79214	1.98185	0.516015
MIAT	3.80012	9.36014	6.39386	9.66724	0.389567	8.82922	1.25701	6.11894	0.411426	8.84524	7.87129	9.35935	9.25802	0.782409	1.56071	1.07724	0.400538	8.13191	9.48696	0.443607	0.443607	0.704872	8.23228	9.46909	0.695994	0.263034	9.20816	0.887525	8.73725	3.40054
SFTPA2	0.659925	10.4142	2.30743	1.79077	5.23764	8.52384	0.687061	1.5008	0.505891	0.124328	1.04963	0.356144	3.90881	8.55605	1.95977	9.64726	0	0.0703893	0.933573	1.41684	0.214125	0.250962	5.9782	0.163499	0.250962	0.545968	7.05441	0.432959	5.29829	14.8805
SCGB1A1	0.238787	14.0084	5.68061	0.773996	2.57773	9.76789	0.575312	0.495695	0.454176	0.344828	11.3347	0.941106	7.20555	7.22506	1.02857	4.02945	0	0	1.33342	0	0	0.584963	6.96613	0	0.333424	0	6.03694	0	4.17552	6.68762
FEV	0.111031	0.275007	0.201634	0.214125	10.216	0.659925	0.238787	0.411426	0.0703893	0.400538	0.31034	1.13093	0.0703893	8.87934	9.56186	9.81719	10.4156	0.505891	0.176323	1.49057	1.04963	0.584963	0.400538	0.389567	0.669027	8.72595	0.659925	9.33969	0.464668	2.57773
TFF1	5.19219	3.17473	0.650765	0.389567	10.0224	1.52105	2.14731	0	1.04963	1.83996	4.26454	0.422233	1.31034	2.0072	12.0502	11.2384	11.3975	0.250962	0.485427	2.97453	3.17632	0.15056	1.34483	0.464668	0.650765	11.6211	1.78241	3.17473	0.454176	3.24184
TM4SF4	7.80342	1.55582	1.31034	0.0703893	8.0129	0.584963	9.76168	6.40037	8.76441	0.400538	0.782409	2.76341	1.9486	0.411426	9.6961	8.92781	4.20242	2.79701	0.201634	9.30307	9.84461	11.368	4.82324	0.263034	6.44907	1.60407	0.748461	8.15269	0.443607	1.64616
NEFL	10.7954	1.14405	0.189034	0.632268	5.89821	0.189034	9.30442	2.23879	9.27468	6.02414	0.111031	2.14731	0.15056	0.137504	6.30907	7.20633	7.42576	3.86888	0.0703893	10.7931	8.95548	7.56712	0.0565835	0.584963	9.19636	1.55582	0.545968	5.08023	0.613532	0.731183
SFTPA1	0.31034	10.154	1.54597	1.66448	4.79233	7.80135	0.443607	0.799087	0.367371	0.0840643	0.333424	0	3.76977	8.53099	0.238787	8.81493	0.137504	0.0285692	0.925999	1.60407	0.0426443	0.0976108	5.20124	0.124328	0.111031	0.201634	6.44328	0.333424	5.37782	14.2597
HMGCS2	4.89724	1.15056	0.0565835	0.0426443	6.95931	0.176323	7.33771	0.0976108	8.29994	0.0285692	0.464668	0.333424	0.0285692	0.344828	6.31397	8.48269	7.81224	0.0565835	0.0840643	7.7039	9.16488	9.33362	0.0840643	0.15056	7.79181	7.68419	0.321928	7.59418	0.189034	0.526069
SLC6A5	0.0840643	7.50383	6.89288	6.98607	0.0143553	0.565597	0.0143553	0.0426443	0.0426443	1.58976	8.47496	0.765535	7.42063	0.0143553	0.0285692	0.0703893	0.0565835	3.42492	9.3192	0.0426443	0.0143553	0.0703893	4.59694	8.93649	0.650765	0.0565835	9.93378	0	8.71884	0.0143553
CALCA	0	10.9068	11.7108	0.613532	0.555816	4.32553	1.04963	0.815575	6.39678	0.31034	0.475085	0.389567	9.39326	0.0840643	0.263034	2.57531	3.14405	4.99684	7.78024	0.238787	4.19928	0.367371	3.85	6.54689	3.22805	0.432959	10.8094	0	0.321928	0.333424
SYT1	0.263034	7.77637	8.60344	8.07879	0.731183	8.51834	7.06372	8.79977	7.00518	9.45354	9.14063	7.17353	6.85137	0.650765	3.04264	3.25096	0.0703893	7.57054	7.67941	1.32193	0.137504	0.238787	8.29632	9.28633	0.432959	0.111031	8.30574	2	9.62945	1.4489
MSMB	9.57285	9.24745	6.96855	4.63807	0.464668	7.41227	7.08289	7.86071	2.98003	6.84775	9.38031	1.43829	9.98181	2.4957	0.722466	5.31615	2.24793	2.81352	11.4372	0.722466	5.97246	4.66391	8.50259	11.0725	7.98692	0.757023	10.7309	0.536053	9.05314	0
LECT1	1.96347	9.52574	7.11697	6.02547	0.722466	0.739848	4.05658	9.32665	0.298658	2.15056	9.15646	6.38957	8.80397	7.58256	0.0976108	0.0976108	0.0840643	10.7966	6.97694	3.75702	2.72901	5.77479	7.09022	8.15947	1.89142	0.263034	9.19138	0.0976108	8.15076	0.238787
EPS8L3	8.23821	0.389567	0.124328	0.0976108	3.31759	0.0840643	7.82744	0.0840643	8.30716	0	0.0703893	0	0.0840643	0	2.68032	6.11166	0.704872	0	0.0285692	9.08505	8.48269	8.12691	0.0840643	0.344828	8.22337	5.49633	0.0565835	8.59679	0.0840643	0.111031
CFC1B	0.9855	0.565597	3.15381	1.16993	9.83476	3.60288	6.96832	0.895303	0.356144	0.555816	0	2.18903	0	6.66945	10.5648	10.8729	9.85789	0.432959	0.575312	1.50589	2.7761	0	1.41143	1.19535	5.60674	9.24857	0.687061	6.52231	0.748461	0.687061
RPRM	5.08151	9.0119	9.3621	10.059	2.20477	9.55236	3.46205	8.99498	5.88484	7.74174	9.94936	9.18577	8.37921	5.59096	4.14486	0.0703893	0.31034	6.50255	9.06218	4.31397	2.4489	0.111031	9.38769	9.51615	3.75061	0.748461	9.52034	0.85599	10.1257	0.263034
GFRA3	4.70708	9.87793	6.90038	9.15828	6.224	8.39631	3.0197	6.78359	0.163499	8.17408	7.96417	5.83719	9.3624	6.39985	0.505891	0.847997	1.65535	5.13996	10.3465	1.34483	0.250962	3.11103	6.60036	10.5009	2.44361	2.42761	10.4425	0.238787	9.81503	0.632268
VIL1	6.28744	0.704872	0.0840643	0.0565835	7.76938	0.214125	8.42429	0.214125	8.23955	0.0426443	0.111031	0.298658	0.124328	0.201634	4.06695	7.18933	5.46597	0.0285692	0.0285692	9.33054	6.32247	8.17652	0.111031	0.15056	6.89724	7.19269	0.137504	7.90129	0.575312	0.367371
PCK1	11.9168	7.25304	8.04051	6.90929	2.8339	6.7447	11.2757	7.41278	11.9017	3.83086	4.31759	5.22651	3.23879	0.238787	6.41752	10.4211	7.93227	0.321928	9.05512	12.1079	12.1667	9.47389	4.75756	7.50152	11.7452	5.98482	4.0993	4.14323	4.53978	0.31034
CRYM	11.3042	7.85854	6.88166	10.0441	0.344828	9.04106	10.0343	6.37313	8.61073	6.83542	10.1926	8.56419	6.90617	0.704872	1.65076	1.63691	0.124328	7.69766	5.86617	11.2414	9.84057	9.75243	6.25001	10.0321	8.97051	0.124328	9.63158	4.86691	9.60563	2.69377
AGR2	9.29384	5.95163	1.26903	0.367371	9.92582	4.44228	9.55161	2.04614	8.77844	0.356144	6.07895	1.72247	1.66903	4.06264	9.9304	10.1151	10.0141	0.201634	0.807355	8.01078	5.46205	0.333424	3.63575	5.41684	8.17941	8.88136	2.04264	7.46181	1.57531	7.55781
SCGB3A2	0.201634	11.9505	4.92552	1.58976	2.73552	9.99324	0	0.286881	0	2.97085	2.07039	0.275007	4.9982	6.03694	0.454176	7.07564	0.15056	0	0.584963	0.485427	0	0	8.02497	0	0	0.124328	5.22419	0.226509	6.32805	9.22176
DIRAS3	12.587	9.77854	9.76348	11.0815	1.38405	2.02148	11.5347	11.202	10.8899	8.55865	11.5925	9.08116	7.98829	6.43679	1.42761	5.14119	3.82375	9.55075	11.118	12.9371	12.0604	3.06695	9.04401	10.6788	11.2021	7.52293	9.56516	7.06523	11.1517	2.33914
SERPINA1	10.1533	7.34056	4.36597	1.64616	11.2177	6.9197	9.92598	1.41684	10.0141	3.70929	4.19456	4.56194	5.09128	6.92647	10.2725	10.8543	11.2504	1.04264	2.58496	10.0377	10.6498	11.0789	5.50016	2.09085	10.8438	11.2066	4.34696	10.4749	4.21257	9.50241
MT1G	10.9541	3.7366	5.14568	6.13402	1.60881	3.85499	10.7214	4.84699	7.9607	0.863938	6.24717	7.20584	5.31361	2.13093	0.454176	0.344828	0.226509	4.38474	2.31325	10.9541	10.7259	13.3041	5.70708	3.10769	4.2555	0.963474	3.86295	4.43962	6.62659	3.08576
GP2	10.0876	11.4049	10.5046	8.96162	0.176323	5.97499	9.87748	6.52513	7.19466	11.0518	5.53512	10.7088	10.0074	2.01078	6.78581	5.73931	6.77109	4.0917	12.1018	11.5857	7.03716	7.52207	8.95204	9.17368	10.7907	4.57773	11.7331	0.790772	6.5741	0.214125
XIST	0.0840643	7.72982	7.34899	0.0565835	0.0703893	4.75542	7.38776	7.69335	6.37556	4.57289	7.8275	9.23522	0.298658	7.82305	7.51672	0.0976108	0.0565835	7.92748	7.8632	6.67044	7.00304	3.62176	8.147	8.11993	7.05929	0.111031	8.06091	0.0565835	7.59708	0.0285692
AZGP1	5.97865	7.86456	0.454176	2.51854	8.21422	2.80941	10.5951	0.790772	6.60984	0.505891	4.19849	4.40599	7.72962	7.55505	7.00473	9.84199	10.8049	0.333424	8.42798	8.2484	8.05572	9.40314	2.76553	6.92208	7.87977	12.8283	5.45812	4.0036	0.910733	5.40939
IGLL5	0.344828	8.80245	0.111031	0.765535	1.72683	8.70131	1.25096	1.0635	0.0976108	5.8936	7.84455	2.55336	8.71328	5.04221	7.77096	6.59276	0	0.0976108	0	0.678072	0	2.11103	8.25025	1.18269	1.04963	0.214125	7.91546	6.25172	3.61471	7.63401
SOD3	13.194	10.7265	6.41397	4.78503	3.80632	6.24203	12.5282	10.4938	12.3759	5.99322	10.685	4.27798	9.70093	5.90737	3.76871	4.36247	2.07724	5.779	5.94181	11.4909	11.975	11.6535	10.678	5.26754	7.15239	2.04963	11.2947	6.31016	6.58782	7.00551
GHSR	7.68468	7.60718	8.84815	7.35385	0.124328	7.99345	7.24717	7.472	8.51148	3.75382	8.26261	6.13586	7.43037	0.0703893	0.163499	0.298658	0.0565835	1.97085	8.10779	8.90926	8.62516	5.95675	6.62848	6.96509	7.99966	0.176323	8.18745	5.25512	7.85156	0.0703893
HPN	7.30916	3.22805	0.411426	0.0565835	4.84197	3.58496	8.0805	5.7301	8.11014	0.669027	5.58225	0.201634	0.389567	2.46728	9.68925	6.76487	8.06937	0.111031	0.111031	8.45697	8.9246	8.13935	1.32193	0.201634	6.93652	6.96821	0.956057	7.25295	5.01212	5.3427
FGA	0.0143553	3.0993	0	0	9.02821	0.757023	1.74846	0	0.111031	0.321928	0.0426443	0.0565835	0.137504	2.34767	10.7472	7.252	4.46467	0.0285692	0.124328	0.0285692	0.0976108	8.62363	0.485427	0	0.286881	8.94207	0.432959	0.214125	0.0565835	2.36177
ALDH1A1	12.3936	4.87578	1.88362	4.21101	11.3958	4.56133	10.6037	3.94767	5.85898	3.98641	4.46074	7.06415	3.72683	9.01809	10.1789	10.739	10.707	3.22342	3.28836	12.2313	10.2537	10.1124	6.33217	2.8953	6.08364	12.2631	5.75489	8.77189	3.87381	7.11749
SLC26A9	0.0285692	7.9926	0.124328	8.18453	0.389567	5.45286	0.137504	1.94486	0.0565835	10.1545	3.7666	0.545968	7.38345	1.58496	0.0565835	0.895303	0.0285692	3.56316	7.08821	4.16993	0.0285692	0.0703893	1.93357	5.9674	0.298658	0.0143553	7.90725	0.0143553	7.19564	5.73335
KRT7	0.594549	7.71692	5.67948	5.33235	2.40871	8.41515	7.29122	7.90442	0.124328	6.2213	6.69488	5.35368	7.29076	6.06996	0.505891	5.26604	0.422233	3.9514	1.40599	0.432959	0.163499	0.807355	5.58556	3.47379	0.201634	0	8.56689	0.604071	8.8415	9.79988
IGJ	0.275007	6.68089	0.411426	0.773996	2.30743	9.21306	1.53107	0.799087	0.286881	6.89348	8.03875	3.95699	9.5748	5.60348	6.75636	5.35544	0.214125	0.111031	0.400538	1.12433	0.163499	2.14405	5.98185	0.831877	1	0.176323	7.85425	3.37434	4.95838	8.99342
FGB	0.0143553	0.0143553	0	0.0143553	8.17158	0	1.93734	0.0143553	0.124328	0.250962	0.0285692	0.0565835	0.0143553	0.0426443	9.66674	7.19466	4.95373	0.0426443	0.0143553	0.0285692	0.0143553	7.6585	0	0.0285692	0.31034	9.94543	0.275007	0.0426443	0	0.0840643
HGD	3.61589	0.575312	1	0.0840643	4.8885	0.333424	6.20457	0.545968	5.35156	0.545968	0.15056	0.189034	0.333424	0.250962	7.32921	8.06237	8.26538	0.189034	0.584963	8.44029	6.26059	6.72955	0.536053	0.238787	6.99594	8.85019	0.344828	3.35191	0.176323	1.42223
SERPINF2	5.69599	3.26604	1.0635	0.565597	8.94886	2.41143	6.26341	0.411426	3.75489	0.613532	1	2.53107	2.07724	5.78346	7.88338	8.77531	8.63063	0.31034	0.584963	6.95594	5.61794	8.3633	2.30451	0.847997	5.33593	8.77149	1.76553	10.5209	0.704872	3.52732
SEZ6L	6.31868	7.32003	9.20259	8.62615	0.0703893	6.0648	6.12846	6.89869	5.46336	7.46622	7.60051	7.31442	5.22997	0.0976108	1.94486	2.51602	0.0565835	7.24479	8.39021	5.12681	5.80323	1.95606	7.5194	10.1844	8.05599	0.137504	7.75061	0.250962	8.67232	0.111031
VTN	12.4607	9.91009	5.70377	5.89385	7.95169	8.17438	12.4984	10.5764	11.1343	3.5656	9.0038	3.16027	3.22651	5.4851	7.71445	7.44807	9.4883	4.43696	5.20398	12.6984	13.2684	12.1943	7.94626	7.0072	12.0441	11.0379	7.58293	10.7656	9.6611	1.79077
CGA	2.56071	8.72673	11.2225	3.12928	6.36124	8.8614	2.40871	7.33602	5.64703	0.941106	6.92339	6.16792	5.20124	3.18587	7.28983	9.40712	8.01865	3.57773	5.30012	0.83996	5.52763	1.22651	8.47484	3.84398	7.29471	13.1086	7.84392	0.678072	4.85898	0.475085
NPW	2.34483	7.64645	0.765535	4.04264	11.7228	6.53916	7.34456	2.38681	1.64616	1.68706	4.27873	5.64039	1.73552	11.9924	7.74073	7.92107	8.31904	0.704872	4.52168	0.847997	6.9982	5.89748	4.88899	5.90111	2.27798	10.0868	2.97085	4.69766	3.7137	0.748461
RAMP1	5.57259	3.11603	2.19219	4.08831	9.18361	4.47703	7.82197	1.58015	9.5439	2.27501	2.33056	4.28836	5.68032	3.28836	8.9438	9.72726	9.1404	2.94673	1.12433	10.0715	10.3131	7.13175	3.49313	1.17632	9.32396	9.79072	3.21723	7.33655	1.1375	3.44626
NR0B1	0.0285692	6.98265	8.29742	7.13196	0	6.29499	2.34483	6.79481	0	8.37304	7.15097	1.15056	6.58556	0.0285692	0.0426443	1.56071	0	1.31034	6.40293	0.298658	0.641546	0	1.36177	6.05181	3.86592	0	6.51238	0.713696	6.46581	0
MEG3	11.4138	11.9213	10.8382	12.4493	8.10381	11.0589	11.7726	11.9328	11.5305	11.8764	11.1401	9.43258	7.04505	9.89028	4.88411	7.15684	9.46693	9.46642	11.8236	11.493	11.4727	9.83586	10.9233	12.5558	12.1485	0.941106	12.5785	1.03562	11.3451	4.00988
SST	6.10538	5.54689	5.51822	5.82528	5.56102	5.2032	5.67779	6.05289	5.6792	0.321928	5.01525	8.64616	1.35614	0.454176	0	0.485427	0.111031	7.19997	12.6035	0.201634	0.485427	0.201634	7.18765	6.66647	7.00338	6.48349	7.76739	5.06652	6.46483	4.98459
DRD2	0.137504	5.87873	7.50247	7.13914	0.111031	6.31343	0.250962	6.29902	0.0143553	5.72137	6.58406	8.30911	5.13955	3.64847	0.773996	1.20789	0.333424	3.94017	6.47768	0.321928	0.389567	0.0143553	6.36999	7.09561	0.411426	0.0143553	7.00248	0.0143553	5.93617	0.0703893
SLC35D3	7.26978	7.78986	8.91725	9.15185	2.18903	9.26871	7.61405	8.46606	6.85425	7.29802	9.25883	7.50621	8.09392	3.85499	2.76129	0.678072	0.0285692	8.82276	8.40557	6.48896	6.90785	5.0268	8.31184	8.51767	7.25001	2.65992	9.2659	0.15056	9.19076	0.176323
SERPINA6	4.20477	0.0426443	0.31034	0	5.11977	0.0426443	5.19653	0	5.2709	0	0.111031	0.226509	0.0840643	0.238787	6.48816	7.65985	8.70639	0	0	4.5735	7.31452	7.95315	0.555816	0.0426443	6.47622	4.26228	0.137504	4.65306	0	0.286881
SCGB3A1	0.526069	11.3952	1.1635	2.45681	3.30012	7.49617	1.63227	4.62585	0.238787	1.87578	9.01678	0.584963	5.43596	7.82782	0.356144	5.69599	1.02857	1.30451	3.34483	3.45154	1.16993	1.20163	5.15015	1.31615	1	0.505891	5.85773	1.30451	7.32409	8.47756
MGST1	0.0565835	6.39025	1.54597	5.18587	2.49825	6.32912	0.0703893	0.333424	0	9.0022	4.82985	8.58222	7.35041	4.92458	3.61235	3.774	2.59694	6.6761	8.96235	0.137504	0.137504	0	4.2426	5.36807	0.0703893	0.333424	5.20594	0.0565835	4.22728	8.04587
MUC13	2.37295	0.475085	0.176323	0.15056	4.43095	0.0703893	3.17632	0.124328	3.87873	0.650765	0.863938	0.0426443	0.137504	0.201634	7.78391	9.61099	10.0294	0.137504	0.422233	5.36317	5.15381	3.57289	1.09085	0.411426	6.2737	7.7418	0.298658	4.27352	0.214125	0.731183
NKX2-1	5.82757	7.58466	2.23266	7.37095	1.11103	6.43329	6.75114	6.7021	5.30268	7.81109	6.46972	6.615	6.71918	6.19259	0	3.82171	0	8.02409	7.61361	0.275007	0.847997	1.63691	6.48623	6.75235	0.275007	0	7.69516	0.0143553	7.30159	8.59145
CABP7	4.55213	6.81275	8.09545	6.99152	0.485427	9.33217	4.67807	7.69565	6.00428	8.43024	6.62863	10.8794	6.7939	0.475085	0.545968	0.765535	0.687061	8.04887	7.13155	6.04089	5.79025	3.52857	5.20672	7.76281	7.27575	0.411426	7.70922	3.69265	7.10056	0.454176
CDHR5	4.05311	0.443607	0.321928	0.400538	0.695994	0.454176	2.22033	0.443607	5.12516	0.201634	0.124328	0.641546	0.555816	0.367371	7.38802	5.1534	3.13586	0.189034	0.464668	7.93127	8.35151	8.50518	0.475085	0.505891	4.12846	0.226509	0.526069	9.18465	0.516015	0.263034
MB	6.66931	7.63503	5.28392	6.69404	0	7.82985	5.67243	8.10591	2.9486	2.5435	8.9843	6.1979	6.48848	0.454176	2.11437	0.0976108	0.124328	1.86394	4.77452	5.9855	7.09719	4.33128	2.72247	8.05306	4.55459	0	7.58173	0.495695	8.34172	0.505891
SMOC1	8.39309	2.39506	9.04835	4.52231	9.23671	5.89797	9.1345	7.13791	8.80452	6.92896	1.67356	5.45615	4.34412	6.16993	8.49717	9.22867	9.30054	1.29278	1.81558	9.67122	9.77839	10.3611	2.01792	5.14282	9.1808	8.25129	3.33199	7.28031	2.50335	1.57531
CXCL13	0.0703893	3.79805	0.443607	0.475085	3.65191	4.28021	0	0.432959	0.790772	2.22651	2.46989	1.29278	0.695994	0.214125	8.63891	10.0163	11.6148	0.163499	0.594549	0.31034	0.0565835	0.137504	1.29278	2.19219	0.238787	4.38819	1.53605	0.226509	3.53481	3.64039
MT1H	8.86922	0.226509	0.344828	0	0.189034	0.790772	7.41515	1.59455	2.07382	1.10434	0	0.978196	1.53605	0.201634	0	0.495695	0	0	0.250962	0.389567	8.00635	11.3584	0.238787	0.238787	0	0	0	0.815575	1.78241	1.48543
STMN2	0.0426443	5.75114	3.18745	6.86987	0.565597	3.46989	0.0703893	7.83055	0.0976108	1.30451	7.70141	2.19535	5.55397	1.38405	0.0840643	1.774	0	7.33762	1.18903	0.0285692	0.0565835	0.226509	4.87283	4.99005	0.31034	0.0840643	2.1177	8.24612	7.62556	0.0426443
NPTX1	0.565597	3	0.443607	5.41447	0.201634	1.73985	0.275007	0.321928	0.0976108	10.7635	0.432959	4.49249	7.27314	6.00293	1.8953	0.137504	0.0976108	7.4941	6.8358	1.80735	0.464668	1.81558	0.948601	4.64212	0.0565835	0.659925	6.63256	0.594549	1.0072	0.0976108
KIF12	7.01167	3.82985	3.44095	4.59515	9.1219	3.38405	7.19889	0.356144	2.9542	2.17951	1.66448	3.63923	4.0063	1.18903	9.09157	9.38416	8.94503	1.88362	0.678072	6.7385	5.8622	7.9219	1.85599	1.17632	5.84323	7.83264	6.09972	9.88564	2.08066	3.37295
NOS1	0.879706	5.22651	2.30451	5.95373	0.0565835	5.84649	0.0426443	4.93734	0	7.00394	6.54612	3.08066	6.48075	0.226509	0.0143553	0.137504	0.189034	3.70929	2.81352	0.0976108	0.0426443	0.0143553	6.78162	8.10779	4.48671	0.0840643	2.27202	0	8.53423	0.773996
DPP4	6.69056	1.26903	0.389567	0.137504	0.790772	1.40054	8.18393	0.773996	7.88087	0.757023	1.07039	0.163499	1.43829	1.59932	0.575312	1.1177	0.250962	0.226509	0.333424	7.56621	7.6691	7.64285	1.09085	0.275007	7.51373	2.15056	1.28688	2.59216	0.454176	4.92125
COL22A1	2.1177	0.83996	9.24581	0.613532	1.02148	6.66732	4.42425	8.13175	5.01748	0.948601	2.16993	1.42761	0.378512	0.604071	0.422233	0.83996	0.594549	2.87381	0.978196	8.77099	7.44452	6.283	2.23573	3.37295	8.64288	1.07724	1.31034	2.774	1.70487	0.475085
GLYATL3	0.903038	0.0285692	0	0.0285692	7.988	0.137504	0.863938	0.0285692	0.475085	0.0565835	0.0426443	0.0565835	0.0565835	0	8.40633	6.56224	4.9905	0	0	1.09761	2.31615	7.35112	0	0.0565835	2.35614	6.96475	0.0703893	6.48188	0	0
C2CD4B	7.8261	5.50938	8.90944	8.08236	2.21412	8.47326	8.04204	8.22968	7.74349	5.54813	6.9712	0.275007	3.45812	2.28688	1.15704	1.44361	0.189034	2.87774	4.66676	7.76553	8.03689	6.20945	6.9782	6.69655	7.6453	1.23879	3.03914	0.970854	7.03133	2.15056
TMEM114	0	5.29646	0.0976108	7.73816	0.344828	6.86802	0.0976108	1.61824	0.970854	2.37016	7.82687	2.61117	5.19298	0	0.124328	0.941106	0	0.0976108	0	0.0976108	0	0	8.7986	1.01436	0	0	4.05658	3.93923	6.99266	0.0976108
LPL	9.03716	7.46646	5.20711	7.84687	2.35332	8.00916	9.47352	7.93882	9.92266	9.49633	8.99913	3.84298	6.00113	3.9855	2.10769	3.25096	0.731183	3.31615	9.57384	10.1616	9.82772	8.53671	7.74201	7.76168	7.83977	1.42761	8.50311	2.93923	9.14453	6.22632
SLC32A1	7.93304	6.26828	0.0976108	4.57228	0.0426443	3.38819	6.34252	0.176323	6.68075	0.0426443	1.02148	0.933573	0.0285692	0.0143553	0.0285692	0.0426443	0.0426443	0.0426443	0.0285692	8.81877	7.37408	0.575312	0.226509	0.111031	1.20789	0	1.93357	0	0.0703893	0.0143553
BMPR1B	0	5.66107	0.0703893	5.851	0.0703893	5.32948	0	0.226509	0.0143553	6.0864	5.7252	4.97499	5.03342	0.555816	0.356144	0.263034	0.0840643	2.72683	6.29793	0.0703893	0.0143553	0.0840643	6.90737	7.03034	0.0426443	0.0143553	6.94263	0.263034	6.22593	0.748461
HNF4A	7.03023	1.46467	0.0426443	0.0703893	5.11853	0.367371	6.92576	0.411426	6.60511	0.650765	1.3505	0.0976108	0.163499	0.226509	4.8089	4.51349	3.91648	0.0426443	0	7.33494	6.66149	6.70432	0.485427	1.11103	6.83403	5.97934	0.124328	7.02591	2.04264	1.88753
CDH17	3.22651	0.333424	0.0840643	0.189034	6.80851	0.400538	5.84222	0.0840643	5.51948	1.04963	0.124328	0.201634	0.275007	0.189034	3.60526	6.41532	4.72629	0.0285692	0.0703893	5.09255	7.37851	2.27798	0.163499	0.163499	5.84348	8.90653	0.321928	6.09761	0.15056	0.176323
PITX1	8.12221	6.94099	6.66178	7.58316	0.0976108	7.37652	7.28753	5.9279	7.02159	5.91265	6.73593	7.07671	5.22574	0.15056	4.86542	0.0426443	0.0565835	4.47962	7.03551	8.05012	7.20711	7.03683	5.80038	6.02037	6.68888	0.0976108	7.1809	0.823749	6.97671	0.0976108
PHACTR3	3.30012	6.25248	7.99548	5.8716	0.0285692	7.0376	0.0703893	4.1035	0.0426443	6.33396	6.29425	4.65935	6.09402	4.25701	0.124328	0.731183	0.137504	6.86839	6.83744	0.367371	0	0.124328	4.13832	4.79233	0.0840643	0.201634	7.07243	0.238787	5.17712	2.74631
GDF10	0.432959	5.52074	9.36665	2.41143	0.124328	2.93923	0.214125	2.72683	1.11103	1.58976	5.70625	0.0703893	1.43829	1.25096	0.238787	0.189034	0.0285692	0.0143553	5.70016	0.226509	0.31034	0.367371	6.96347	8.82464	3.38128	0.0426443	5.71589	3.90497	7.26285	3.86394
ADCYAP1	0.0426443	6.03606	6.3679	1.09085	6.70681	4.93357	1.39506	3.28688	0.137504	5.42559	1.90304	5.47151	5.06134	1.33342	8.37125	7.52372	10.7784	6.27891	3.20633	0.0565835	2.52105	0.443607	4.24031	6.37851	5.10056	7.633	4.55275	0.0143553	1.63691	1.70044
SPHKAP	6.47054	3.95513	3.8679	7.94825	0.0285692	5.71727	6.83744	7.98652	4.50271	5.26903	7.19229	6.43946	6.44145	1.58976	0.0703893	0	1.48543	8.10622	6.81031	4.86146	6.37173	0.163499	6.47897	6.44956	3.57289	0	5.79494	0.0426443	6.10748	0.0143553
CEACAM1	6.37764	2.26903	0.722466	0.910733	7.26247	1.96717	6.83099	1.4489	6.76726	1.02148	1.19535	2.07724	1.60881	3.77821	8.65374	7.46565	7.83093	1.1375	0.831877	6.84812	7.04745	6.70639	1.04963	0.464668	6.98698	6.48623	1.30451	5.40667	0.695994	2.59216
KRT19	0.286881	6.55658	3.16993	0.632268	7.99882	5.22226	1.04963	0.918386	0.137504	1.42761	5.68986	4.72247	3.25248	5.67327	7.4138	6.90833	7.48172	0.0703893	0.226509	1.74416	0.298658	0.111031	4.46989	0.356144	1.04963	5.81378	4.77136	4.58075	2.15056	9.20323
CRYBA2	2.29866	3.16027	4.16912	2.96347	10.2531	4.15866	3.90497	3.16672	1.20163	3.17632	3.39232	4.77452	2.46989	7.70729	9.91076	10.1356	10.4507	4.05398	3.25701	4.40667	4.01881	2.55582	3.60526	3.32625	2.7761	10.0681	3.84197	9.8324	3.91552	2.90497

## Sheet: Fernandez-Cuesta et al
Fernandez-Cuesta et al gene expression (Scaled) for Var100 Lung Carcinoids gene signature
Subtype	LC1	LC1	LC1	LC1	LC1	LC1	LC1	LC1	LC1	LC1	LC1	LC1	LC1	LC1	LC1	LC1	LC1	LC1	LC1	LC1	LC1	LC1	LC1	LC1	LC1	LC1	LC1	LC1	LC1	LC1	LC2	LC2	LC2	LC2	LC2	LC2	LC2	LC2	LC2	LC2	LC2	LC3	LC3	LC3	LC3	LC3	LC3	LC3	LC3
Gene	S00016	S00076	S00118	S00128	S01060	S01501	S01502	S01504	S01515	S01519	S01520	S01528	S01536	S01543	S01545	S01572	S01573	S01590	S01733	S01742	S01746	S02126	S02154	S02162	S02327	S02330	S02331	S02333	S02335	S02337	S00089	S00520	S00716	S01202	S01493	S01510	S01513	S01567	S01666	S02323	S02325	S00094	S00515	S00516	S00858	S01103	S01526	S01529	S01531
SCGB1A1_NM_003357	-0.79856	-0.432477	-0.0967674	-0.869554	-0.869554	-0.289378	-0.557133	1.3996	2.62505	0.382759	2.34979	1.52873	1.0117	-0.221282	-0.869554	-0.869554	0.982981	-0.444073	-0.869554	1.1477	0.438759	1.01178	0.0847867	0.973336	-0.157223	1.4792	-0.713705	0.479825	0.599441	0.385688	-0.361002	-0.784136	-0.476676	-0.869554	0.634498	0.82401	3.19752	1.10655	-0.856309	-0.752643	-0.869554	-0.869554	-0.768996	0.668915	-0.869554	-0.869554	-0.869554	1.30118	-0.869554
TTR_NM_000371	-1.2565	-0.877588	-1.06685	-0.165862	-1.08985	-1.2565	-1.14832	-1.2565	-0.887294	-1.2565	-1.2565	-0.493176	-0.809866	-0.395503	-0.376724	-1.2565	-1.04366	-0.807913	-0.0389241	-1.1862	-1.2565	-1.2565	0.209158	-1.2565	-1.16344	-0.863219	-1.2565	-1.13357	-1.16039	-1.12634	-0.536028	0.394005	0.612143	1.00881	0.803884	1.0262	0.243337	0.81305	1.00126	0.552904	1.13793	1.31531	0.845666	0.93859	1.09704	0.825317	0.741352	1.54374	1.23025
SST_NM_001048	-0.670474	1.56162	1.97529	-0.670474	-0.537658	0.930101	1.11719	0.259114	0.423076	0.938514	-0.0510309	-0.670474	1.0449	-0.28259	0.898857	-0.670474	-0.670474	-0.0317397	-0.670474	0.90078	-0.29292	1.67032	-0.670474	1.80281	0.0829519	1.12001	0.73018	-0.263177	0.327402	2.08495	2.29013	-0.670474	-0.670474	-0.670474	-0.670474	-0.46113	3.75777	-0.670474	-0.670474	-0.670474	-0.670474	-0.670474	-0.282678	-0.670474	-0.670474	-0.670474	-0.670474	-0.670474	1.44931
GRP_NM_002091	1.08941	1.60881	-1.08961	0.0876085	0.705687	1.41714	0.835859	0.928801	0.371931	1.01166	0.954383	1.09248	0.784436	1.47948	0.979515	1.33565	1.08635	-0.318752	-0.986346	1.29803	1.35938	0.775637	-0.661303	1.632	1.0235	1.38144	0.901198	-0.539588	1.07664	1.55824	0.572177	-1.08961	-1.08961	-1.08961	-1.08961	-1.08961	1.23804	-1.08961	-1.08961	-0.899191	-1.08961	-0.956296	0.9022	-0.940186	-1.08961	-1.08961	-0.950529	0.211668	0.314394
GRP_NM_001012513	1.11565	1.64392	-1.04923	0.113987	0.658657	1.45896	0.907031	1.12704	0.267432	0.854375	0.969484	1.08521	0.744188	1.50072	1.00799	1.25332	1.11265	-0.425778	-1.04923	1.27632	1.41841	0.778937	-0.910042	1.67171	0.978939	1.3356	0.891015	-0.678382	1.08165	1.53407	0.576063	-1.04923	-1.04923	-1.04923	-1.04923	-1.04923	1.30416	-1.04923	-1.04923	-0.86367	-1.04923	-0.865178	0.918888	-0.854859	-1.04923	-1.04923	-1.04923	0.113756	0.297594
CARTPT_NM_004291	-1.51748	-1.51748	0.38067	-0.871582	-1.51748	0.207342	1.3291	-1.51748	1.05203	-0.916543	-1.51748	-0.874397	-0.58008	-0.277573	-0.341498	0.475117	-0.68198	-0.763616	0.203822	-0.352981	-1.35186	-1.4683	-0.786752	-1.51748	-1.11913	-0.632111	-0.740231	-0.196817	0.048094	-0.67398	0.293509	0.40024	1.469	1.02979	0.711586	1.53913	-1.30188	0.636226	1.23208	1.43913	1.15854	0.797667	-0.799389	-0.348264	0.158045	1.07881	0.74496	0.439347	1.08701
MT1G_NM_005950	-1.19105	-0.520819	-0.706757	-1.13917	-0.11341	-0.619968	-1.21353	-1.21353	1.43254	-0.427821	0.533607	0.0738301	0.21771	-0.543511	0.657854	-1.21353	-1.03252	0.326652	-0.7404	-0.391993	-0.843732	-1.21353	-1.21353	1.38418	0.358079	-0.312512	-0.497001	-0.0646869	0.342381	0.384586	-1.21353	-1.21353	-1.21353	-1.21353	-1.21353	-1.21353	-0.680376	-1.09759	-0.718735	-1.21353	-1.21353	0.0406422	0.481942	0.550818	1.08516	0.139509	0.627577	1.55214	1.74082
CXCL13_NM_006419	-0.56342	0.757466	-0.56342	1.52458	-0.56342	-0.56342	-0.56342	-0.56342	-0.56342	-0.56342	0.0493875	-0.157505	0.428799	0.71402	-0.0212835	-0.56342	0.456823	0.778871	-0.56342	-0.146284	-0.56342	0.339134	0.557744	0.142342	0.577794	-0.212421	-0.56342	0.244588	-0.56342	-0.56342	-0.56342	1.29215	2.5153	0.467363	-0.56342	-0.56342	2.24735	0.268215	-0.56342	5.50854	1.38536	-0.56342	-0.56342	-0.56342	-0.56342	-0.56342	-0.56342	-0.56342	0.858553
CGA_NM_000735	-0.00587437	-1.12655	1.42483	-1.77081	-1.05796	0.0463476	0.167884	0.504712	0.716823	0.476125	-0.689882	0.609303	0.173681	1.85587	-0.164617	1.02619	1.10339	0.350608	0.28146	0.632125	-0.283836	-1.77081	1.19052	-0.478382	-0.0947436	-0.0295934	-1.03299	0.376969	1.46423	-0.680192	1.37937	-0.866876	0.467039	0.791624	-0.544238	0.152959	-1.77081	-1.77081	-0.00194467	0.880093	2.13442	1.55115	0.930054	0.969603	-1.49396	-1.35185	-1.03919	0.668147	0.072072
DLK1_NM_003836	1.33232	0.456429	0.23332	-1.70064	1.39933	0.253963	0.518452	0.582607	0.808407	0.274814	0.495583	0.491014	1.76416	-1.52636	-1.09042	-0.421576	1.34009	0.959628	-0.601715	-0.508205	-0.647006	-0.290749	-0.41013	-0.177917	0.888098	1.18321	0.392326	1.08961	-0.190291	-0.498117	-1.70064	-1.70064	-1.70064	-0.0123123	-1.70064	-1.54547	-1.70064	-1.70064	-1.70064	-1.70064	0.0522689	-0.779829	-0.953551	1.42096	0.778518	1.56077	0.564609	-0.987425	0.0931113
DIRAS3_NM_004675	-0.177878	-0.301465	-0.023949	-0.0122005	0.626392	-0.413769	-0.456739	-0.628594	0.0517634	-0.0163427	0.156408	0.584706	0.469121	0.453997	0.578875	0.22849	0.123346	0.422992	0.245684	0.0147711	-0.0703174	-1.0569	0.281563	-0.634612	0.220181	0.524337	-0.425205	0.546813	0.161528	0.525782	-0.536332	-3.08763	-3.16593	-2.51617	-0.694291	-1.00317	-1.92682	-0.626373	-0.247644	-3.16593	-1.68619	0.562673	0.132083	0.910229	0.169277	0.119763	1.16589	1.07266	0.727122
MSMB_NM_002443	0.743659	-0.639452	-1.22675	-1.0958	1.31462	1.92954	0.300998	0.693784	-0.315284	-0.0210876	0.998128	0.992251	1.51151	0.501018	0.8389	-1.22675	-0.00734989	-0.161162	-0.222802	1.60932	0.325432	-1.22675	-0.537864	-1.22675	1.7273	1.76506	0.27567	-1.22675	0.834206	2.07475	-1.22675	-1.22675	-0.890709	-1.22675	-1.13091	-1.1298	-1.22675	-1.22675	-1.22675	0.668836	-1.22675	-1.22675	-0.8066	0.151104	0.283653	-1.22675	0.0649384	-1.22675	-1.22675
TFF1_NM_003225	-0.669506	0.102895	-0.669506	-0.669506	-0.669506	-0.490328	-0.669506	-0.669506	0.0969528	-0.669506	-0.669506	-0.669506	-0.669506	-0.220427	-0.669506	-0.669506	-0.669506	-0.669506	-0.669506	-0.640637	-0.669506	-0.669506	-0.669506	0.257787	-0.669506	-0.508999	-0.135942	-0.669506	-0.669506	0.151191	-0.669506	2.0323	2.80112	3.17309	1.37447	0.999724	0.208663	0.928332	1.6611	3.13833	2.83691	-0.669506	0.0984549	0.824637	0.188799	0.0421636	-0.669506	0.480997	-0.669506
ALDH1A1_NM_000689	-0.926783	-0.94965	-1.3339	-0.534428	-1.52417	-1.27054	-1.2182	-0.97507	-0.578174	-0.501311	-0.622527	-0.871404	-0.990658	-0.95717	-1.15897	-1.43038	-0.943867	-0.240059	-0.525373	-0.62147	-1.2977	-1.48958	0.031732	-0.686353	-0.766255	-0.67342	-0.326876	-1.06091	-0.92196	-0.970175	-0.195261	0.815028	0.742575	0.60939	1.24256	1.0362	-0.342681	1.33256	1.26139	0.821807	1.1977	0.82909	-0.158968	1.13418	-1.10532	-1.51403	1.36432	1.37502	0.780187
SOD3_NM_003102	-0.837486	-0.855451	-1.69346	0.543845	-1.24821	0.552833	-1.04604	-0.475224	0.0361406	-0.807348	0.423034	-0.0508249	-0.315348	0.276441	1.51261	-1.62838	-0.949447	0.297078	0.0828939	0.580515	-0.0731341	-1.49524	0.231788	-1.07254	-0.971967	-0.640848	-0.749602	0.702833	-0.793914	0.364755	-1.37745	-1.44438	-1.92198	-1.86557	-0.570032	-1.41624	-0.0940802	-0.619919	-0.841715	-1.20718	-1.13376	0.63645	1.27577	1.13255	1.14027	1.033	1.03967	1.0108	1.15447
PCK1_NM_002591	-0.77177	-1.36246	-1.30974	-1.38142	0.22916	-1.38142	-0.700798	-1.18654	0.524009	-0.564857	-0.225437	-0.301425	-0.299573	-0.0721711	-0.373867	-0.0648562	-0.82725	-0.116835	-0.679751	-1.2366	0.65626	-1.38142	-0.259168	-1.38142	-0.190876	-0.236787	-0.816539	-0.21397	0.223513	0.215649	-0.60972	-1.17464	0.026626	-1.38142	0.125205	-1.38142	-1.17364	-1.38142	-1.38142	-1.38142	-1.38142	1.4822	0.922361	1.44264	0.487784	0.942489	0.899392	1.00202	0.944874
VTN_NM_000638	-0.93632	-0.813147	-0.597053	-0.738159	-0.4395	-0.635986	-1.74078	-2.20745	-0.316293	-1.4684	-0.180639	0.0756035	0.126777	0.293369	0.499462	-2.29792	-1.19203	0.621121	0.571848	0.0467139	-1.77617	-1.7876	0.713212	-0.486235	0.397766	-0.140139	-1.79822	0.665219	-1.54931	-1.55148	-0.014423	-0.46748	0.315711	-0.0367595	0.118983	-0.925903	-1.54823	-0.697274	-0.118778	0.191091	0.540228	0.0297155	0.0813789	1.30667	0.726201	0.504416	1.11161	0.992798	1.10414
CALCA_NM_001741	1.58619	-0.53836	-0.53836	0.329073	-0.53836	2.45781	2.11719	0.891622	0.512753	0.0285702	-0.17615	-0.53836	-0.53836	-0.412076	1.02896	-0.53836	1.8015	-0.53836	-0.53836	2.69105	0.235576	-0.53836	-0.53836	-0.53836	0.870184	2.40944	-0.53836	-0.53836	-0.53836	1.81939	-0.53836	-0.53836	-0.53836	-0.53836	-0.53836	-0.53836	3.81291	-0.53836	-0.53836	-0.53836	-0.53836	-0.53836	-0.0465065	0.75935	0.503814	-0.53836	-0.53836	-0.53836	-0.53836
AGR2_NM_006408	-0.929115	-1.09006	-1.09006	-1.09006	-1.09006	-1.09006	-1.09006	-0.801603	-0.156918	-1.09006	-0.0920681	-0.627286	0.52572	-0.325217	-0.701308	-1.09006	-0.216935	-0.708763	-1.09006	-0.340084	-1.09006	-1.00542	-0.133173	-0.302398	0.928673	0.0413312	-0.63001	-0.109302	-1.05975	-0.986148	-1.09006	0.232241	1.86509	1.80308	-0.847472	0.664019	0.407661	0.171505	0.697829	1.11222	2.28178	-1.09006	1.96509	0.256348	0.765709	1.84833	-1.09006	0.115821	-0.288819
GHRH_NM_021081	-0.869173	-0.869173	-0.869173	-0.869173	-0.659217	-0.81238	-0.869173	-0.869173	1.6872	-0.869173	-0.869173	0.630302	0.672398	-0.869173	0.503303	-0.869173	0.151337	0.752956	0.630649	1.02313	-0.869173	-0.869173	2.15842	-0.869173	-0.0318613	-0.668516	-0.331414	1.07186	-0.623558	-0.869173	-0.869173	-0.869173	-0.656174	-0.869173	-0.869173	-0.869173	-0.869173	-0.869173	-0.869173	-0.869173	-0.869173	-0.391717	-0.869173	0.820273	1.7094	1.10928	1.99788	1.16242	0.661877
SERPINA1_NM_000295	-1.35344	-1.30464	-1.37458	-0.453756	-1.37458	-1.37458	-1.0302	-0.483669	0.188184	-1.37458	-0.40005	-0.755754	-1.37458	-0.442192	-1.2893	-1.37458	-0.535072	-1.37458	-0.242137	-0.546647	-0.724192	-1.31895	-0.29721	-1.07034	-1.37458	-0.652319	-1.37458	-1.37458	-1.31347	-1.07348	-1.13783	0.642638	0.662287	0.436475	0.826864	0.830857	0.78376	0.982316	1.24083	1.10407	1.03227	1.30163	0.259412	0.859452	1.01995	1.16199	0.735247	1.09584	0.861623
SFTPB_NM_000542	0.296735	-0.844766	-0.844766	0.429793	-0.844766	-0.844766	0.788475	1.30643	1.75081	-0.4878	1.76103	0.877685	-0.251275	1.7373	-0.844766	0.00718349	1.56702	-0.844766	-0.844766	1.68362	0.862769	0.625478	0.249518	1.27173	-0.174018	1.50725	0.266333	0.875266	0.57302	0.783236	0.449056	-0.844766	-0.563443	-0.844766	0.750583	-0.844766	3.09216	1.91109	-0.844766	-0.844766	-0.468527	0.368739	-0.844766	-0.0223145	-0.844766	-0.372166	-0.844766	-0.844766	-0.844766
GP2_NM_001502	0.569089	-1.58626	-1.58626	0.099494	0.630553	1.30628	0.68947	1.2875	1.37084	0.234362	-0.396295	-0.373607	0.0623796	0.383051	-0.03144	1.39402	1.2625	-1.58626	-0.646533	0.50332	1.31489	-1.58626	0.18778	1.4174	0.985131	1.06415	0.677369	0.699728	1.16323	1.02476	-1.58626	-1.58626	-1.58626	-1.58626	-0.868664	-0.0800209	-1.58626	-1.58626	-0.592133	-1.10056	-1.58626	-0.95424	1.26764	1.08253	0.792929	1.55302	0.2653	-0.722376	0.261634
SCGB3A2_NM_054023	-0.26081	-0.710995	-0.710995	-0.710995	-0.710995	-0.710995	0.61153	0.951759	2.27799	-0.300593	2.08853	1.1536	1.00095	1.58238	-0.710995	-0.710995	1.81113	-0.710995	-0.710995	1.53012	0.722189	0.920705	0.261277	1.27851	-0.589142	1.45973	0.0293341	1.47807	0.981379	0.318457	0.915512	-0.710995	-0.710995	-0.710995	0.825387	-0.710995	2.96791	1.61508	-0.710995	-0.710995	-0.710995	-0.710995	-0.710995	-0.710995	-0.710995	-0.710995	-0.710995	-0.710995	-0.710995
GP2_NM_001007242	0.331449	-1.72554	-1.72554	-0.0683434	0.417393	1.10784	0.259179	0.8024	1.16178	-0.0706787	-0.578002	-0.681824	0.387586	0.844976	0.261372	1.10115	1.07968	-1.72554	-1.03159	0.394911	1.28843	-1.72554	-0.418709	0.790891	1.04219	1.02677	0.0938859	0.496175	0.368257	1.23819	-1.72554	-1.72554	-1.72554	-1.72554	-1.12599	-0.0733415	-1.72554	-1.72554	-0.820018	-0.936622	-1.72554	-1.05899	1.1474	1.07233	0.501278	1.11766	0.958611	0.182541	0.711593
AZGP1_NM_001185	-1.71503	-1.71503	-0.475291	1.46597	-1.42285	0.985926	-0.380037	0.246453	0.626623	-1.22792	-0.775869	-0.360382	-1.71503	1.49237	-1.58532	-1.71503	-0.816485	-1.71503	-0.634413	0.235669	-1.29356	-1.57489	-1.0828	-0.181176	-1.66721	0.328979	-1.25273	-1.34658	-1.28939	1.10058	0.195248	0.571716	0.14727	1.21182	-0.201484	1.38346	0.291828	0.826684	1.20479	1.57051	1.30169	0.476875	0.699464	0.380826	1.34102	0.555457	0.304129	0.344685	0.893239
APOH_NM_000042	-0.987332	-0.987332	-0.987332	-0.987332	-0.987332	-0.987332	-0.987332	-0.987332	-0.987332	-0.987332	-0.987332	-0.987332	-0.987332	-0.90037	-0.987332	-0.987332	-0.987332	-0.987332	-0.727343	-0.987332	-0.987332	-0.987332	-0.33558	-0.987332	-0.987332	-0.987332	-0.987332	-0.987332	-0.987332	-0.987332	-0.987332	1.25187	1.48607	1.03832	1.28093	1.58601	-0.987332	1.15963	1.01546	1.56273	1.03817	1.28507	0.792294	0.728704	0.688015	-0.0663958	0.88604	1.45506	0.788792
TM4SF4_NM_004617	-0.967949	-0.967949	-0.967949	-0.967949	-0.967949	-0.967949	-0.967949	-0.967949	-0.967949	-0.967949	-0.206098	-0.967949	-0.926353	-0.967949	-0.604935	-0.967949	-0.967949	-0.967949	-0.0540471	-0.967949	-0.967949	-0.967949	-0.505044	-0.967949	-0.967949	-0.967949	-0.967949	-0.967949	-0.835929	-0.967949	-0.967949	0.291151	1.25025	0.626832	0.0540491	1.19845	-0.284766	-0.376971	-0.580066	1.98934	-0.574531	0.949809	1.33699	0.0697617	1.43178	-0.131397	1.13361	1.16022	1.43514
RDH12_NM_152443	-0.914438	-0.914438	-0.914438	-0.914438	-0.914438	-0.914438	-0.914438	-0.914438	-0.914438	-0.914438	-0.914438	-0.691161	-0.252498	-0.650313	-0.914438	-0.914438	-0.914438	-0.914438	0.186804	-0.914438	-0.914438	-0.914438	-0.0869765	-0.914438	-0.780786	-0.914438	-0.482234	-0.914438	-0.914438	-0.914438	-0.914438	-0.502211	-0.914438	-0.914438	-0.114134	-0.272463	-0.914438	-0.459952	-0.00913891	-0.00348288	-0.914438	1.19247	0.911444	1.57228	0.926872	0.708724	1.04904	1.6483	1.25622
MT1H_NM_005951	-0.633996	-0.633996	-0.633996	-0.633996	-0.633996	-0.633996	-0.633996	-0.633996	1.88619	-0.633996	-0.633996	-0.498618	-0.633996	-0.633996	0.181626	-0.633996	-0.633996	0.00162854	-0.633996	-0.633996	-0.633996	-0.633996	-0.633996	2.31659	-0.289774	-0.633996	-0.633996	-0.633996	-0.0876355	-0.58873	-0.633996	-0.633996	-0.633996	-0.633996	-0.633996	-0.633996	-0.633996	-0.633996	-0.633996	-0.633996	-0.633996	-0.633996	-0.633996	0.0618478	1.45884	-0.466543	0.386729	1.39942	2.22328
RAMP1_NM_005855	-1.32759	-0.641468	-0.649667	-1.32759	-1.05295	-1.32759	-1.32759	-0.777415	0.125531	-0.307772	-0.618166	-1.32759	-0.730521	-1.22434	-1.29525	-1.02905	-0.900432	-0.881452	-1.03442	-0.785514	-1.2092	-1.32759	-0.90738	-0.68194	-1.10187	-1.07419	-1.32759	-1.32759	-0.502224	-1.32759	-1.32759	0.67901	0.766115	1.37363	0.565007	0.734015	0.0529545	0.508477	0.571861	0.848289	0.849039	0.748755	1.26855	1.04365	1.12801	0.942399	0.647607	1.1576	1.28936
NEFL_NM_006158	0.00937687	0.154761	-0.423858	-1.02572	-1.02572	-1.02572	-1.02572	-1.02572	-1.02572	-1.02572	-1.02572	-1.02572	-1.02572	-1.02572	-1.02572	-1.02572	-1.02572	-0.621436	-1.02572	-1.02572	-1.02572	-1.02572	-0.706085	-0.11638	-1.02572	-1.02572	-1.02572	-1.02572	-1.02572	-1.02572	-0.0309167	0.714967	0.63947	0.549882	0.967576	0.878097	-1.02572	0.497356	0.439671	0.196914	0.805455	1.7544	-0.886454	1.36823	-0.963034	-0.71565	1.24084	1.68119	0.923942
SFTPC_NM_003018	0.791235	-0.83659	-0.83659	-0.83659	-0.83659	-0.83659	1.0716	1.63727	0.777442	-0.83659	1.57405	1.54393	-0.83659	2.35201	-0.83659	-0.83659	0.851926	-0.83659	-0.83659	1.62472	0.50293	0.765923	0.903263	1.65901	0.287531	1.87045	0.363822	0.629532	0.25645	1.13863	0.332997	-0.83659	0.0277526	-0.603379	0.856888	-0.83659	-0.83659	2.36491	-0.83659	-0.83659	-0.0728113	0.789916	-0.83659	-0.83659	-0.83659	-0.83659	-0.587361	-0.341707	-0.83659
TRH_NM_007117	0.297636	-0.714692	-0.714692	-0.714692	1.89154	0.147171	1.89148	0.784082	-0.151057	1.51192	-0.714692	2.07078	1.75265	1.5772	1.38305	2.00977	1.04566	-0.411202	0.548317	0.705758	1.75145	-0.714692	-0.138849	-0.714692	1.41522	2.01527	-0.714692	0.982227	1.46419	2.12535	-0.688812	-0.714692	-0.714692	-0.714692	-0.714692	-0.714692	-0.714692	-0.714692	-0.714692	-0.714692	-0.714692	-0.714692	0.356784	-0.714692	-0.714692	-0.714692	-0.714692	0.0696446	-0.714692
MEG3_NR_002766	1.30938	0.0641528	-0.421889	-0.167998	1.40442	0.675232	0.943473	-1.51107	0.374744	0.0242986	0.620429	0.539148	1.33068	0.305644	1.17186	0.531069	0.79363	0.64771	1.06056	0.876694	0.398793	0.918204	0.7387	-1.24666	0.837475	1.15412	1.06017	0.592074	-0.356815	0.866536	-2.20993	-2.20993	-1.47194	-0.235925	-0.607519	-1.40385	-0.143968	-2.20993	-2.20993	-2.20993	-2.00229	0.225436	-1.49975	0.328882	0.453249	-0.631969	0.12114	-0.125212	0.315231
SFTPB_NM_198843	0.197942	-0.667551	-0.667551	0.228003	-0.667551	-0.667551	0.609095	1.41104	2.00649	-0.664303	1.94563	0.589888	-0.667551	1.35002	-0.667551	-0.143949	1.53898	-0.667551	-0.667551	1.69658	0.615123	0.206836	0.0121212	1.30176	-0.667551	1.55495	0.0399055	0.767957	0.14764	0.622629	0.176771	-0.667551	-0.667551	-0.667551	0.473883	-0.667551	3.78292	2.09259	-0.667551	-0.667551	-0.667551	0.029185	-0.667551	-0.667551	-0.667551	-0.383553	-0.667551	-0.667551	-0.667551
CRYM_NM_001014444	0.0993912	0.257662	-1.92839	-1.41233	0.702873	0.793401	-0.138006	-0.126254	-0.315322	0.663262	0.235103	0.575752	0.566361	0.162158	0.507419	-0.341349	-0.475188	-0.117389	0.681194	0.754112	0.0176932	-0.675468	-0.0752474	0.177013	0.159078	-0.246257	0.616205	-0.277599	0.288952	0.607698	-1.16815	-1.92839	-1.92839	-1.92839	-1.92839	-1.92839	-0.280323	-1.92839	-1.92839	-1.92839	-1.92839	0.207201	-0.458323	1.08674	0.381909	-0.480916	0.889682	1.07776	1.28561
GFRA3_NM_001496	0.818894	-0.923299	-0.321808	-0.923299	1.00066	1.65557	1.40718	1.4044	-0.923299	1.05088	1.0989	1.27372	0.439688	0.255435	1.48576	0.0196419	0.869193	0.922341	0.557144	1.6471	0.37413	-0.923299	0.866899	0.0285554	1.68826	1.81969	1.09185	1.11921	1.04523	1.95991	-0.841775	-0.923299	-0.923299	-0.923299	1.02355	0.888408	-0.923299	0.841297	1.117	-0.923299	-0.923299	-0.923299	-0.923299	-0.543581	-0.923299	-0.923299	-0.908826	-0.923299	-0.923299
SCGB3A1_NM_052863	0.0183431	-1.13622	-0.306319	-1.13622	-1.03577	-0.120265	-0.241796	1.30723	1.64769	-0.669496	2.34861	1.24412	0.108459	2.11796	-0.273773	-1.13622	0.794031	0.295964	-1.13622	1.08617	0.766086	0.630282	-0.467235	0.13411	0.00653231	1.49073	-0.623767	1.00031	0.367126	0.673587	0.0972219	-0.776661	-1.13622	-0.981614	0.3936	0.595206	1.89492	1.16817	-1.13622	0.501334	-0.579318	-0.00777211	-0.168246	1.74946	-1.13622	-1.13622	-0.989694	1.18692	-0.983204
SFTPC_NM_001172410	0.681105	-0.80008	-0.80008	-0.80008	-0.80008	-0.80008	1.06914	1.64998	0.842895	-0.80008	1.60878	1.5781	-0.80008	2.45553	-0.80008	-0.80008	0.810798	-0.80008	-0.80008	1.63071	0.485509	0.806798	0.804791	1.69378	0.147228	1.94854	0.333359	0.529216	0.139355	1.14824	0.244628	-0.80008	0.0386569	-0.80008	0.775878	-0.80008	-0.80008	2.52044	-0.80008	-0.80008	-0.152821	0.707739	-0.80008	-0.80008	-0.80008	-0.80008	-0.564275	-0.419061	-0.80008
RPRM_NM_019845	1.09675	1.04161	-1.30154	0.612706	1.08943	1.06392	0.800552	1.15984	-0.909077	1.15	1.22195	1.41814	1.16795	0.51854	1.50925	-0.346589	1.03128	-0.265713	1.10484	1.06857	1.08263	0.602383	1.26539	0.891425	1.02261	1.10284	0.987735	0.694483	1.34306	0.997724	0.651004	-1.30154	-1.30154	-1.30154	-1.30154	-1.30154	-1.30154	-1.22425	-0.461763	-1.29738	-0.774114	-1.30154	-1.30154	0.00460321	-0.779816	-1.30154	0.0485974	-0.463082	-1.06479
SFTPA2_NM_001098668	0.584124	-0.824337	-0.824337	-0.824337	-0.824337	-0.824337	0.942259	1.44589	1.15142	-0.824337	1.75794	1.20373	-0.824337	1.55733	-0.579289	-0.824337	1.12892	-0.824337	-0.824337	1.8297	0.113624	0.896465	0.670993	1.96762	0.38223	1.88512	0.607403	0.877229	0.239623	0.855711	-0.106569	-0.824337	0.0419588	-0.824337	0.676375	-0.824337	1.67607	2.48847	-0.824337	-0.0215624	-0.0236386	0.435229	-0.824337	-0.53781	-0.824337	-0.824337	-0.824337	-0.824337	-0.824337
TM4SF5_NM_003963	-0.885111	-0.885111	-0.885111	-0.885111	-0.885111	-0.885111	-0.885111	-0.885111	-0.885111	-0.885111	-0.885111	-0.885111	-0.885111	-0.885111	-0.885111	-0.885111	-0.885111	-0.885111	-0.534619	-0.885111	-0.885111	-0.885111	-0.547596	-0.885111	-0.885111	-0.885111	-0.885111	-0.885111	-0.885111	-0.885111	-0.885111	-0.885111	-0.418275	0.993231	0.391776	0.16264	-0.885111	-0.771997	-0.295487	-0.463087	0.604876	0.879703	0.383524	1.2875	0.938151	1.50079	1.07681	1.54819	1.27252
NPW_NM_001099456	-1.11739	-1.07657	0.64907	-0.277774	-0.314842	-1.11739	-1.11739	-1.11739	0.039276	0.160041	0.50379	0.586381	0.0148783	0.235639	-0.655613	-0.846036	-1.11739	-1.11739	-1.11739	0.433511	-1.06617	-0.786456	1.89004	-1.11739	0.604606	0.118793	-0.515359	0.218924	-0.00962675	-1.11739	0.601078	-0.386636	0.75168	0.540683	1.51363	1.35066	-0.633947	2.41664	2.05021	1.22145	2.07244	-0.0375009	-0.530898	-0.971063	1.09429	0.401756	-0.976787	1.42001	-0.640813
FEV_NM_017521	-0.423995	-0.423995	-0.423995	-0.423995	-0.423995	-0.423995	-0.423995	-0.423995	-0.423995	-0.423995	-0.423995	-0.423995	-0.423995	-0.423995	-0.423995	-0.423995	-0.423995	-0.423995	-0.423995	-0.423995	-0.423995	-0.423995	-0.423995	-0.423995	-0.423995	-0.423995	-0.423995	-0.423995	-0.423995	-0.423995	2.80782	2.30729	1.99261	2.67964	2.38624	2.48228	-0.423995	2.70353	2.19992	-0.423995	2.1684	-0.423995	-0.423995	-0.423995	-0.423995	1.13477	-0.423995	-0.423995	-0.423995
AQP3_NM_004925	-1.34231	-1.66311	-0.484621	-1.16072	-1.66311	-0.045433	0.640447	-0.823973	0.73295	-1.64468	-0.659382	-0.896402	-1.66311	-0.171355	-1.66311	-1.32142	-0.669013	-1.37769	-1.48263	-0.0782468	0.0553457	-1.66311	-1.27387	0.327955	-0.341098	0.585891	-1.08409	-1.66311	-1.00934	0.967256	0.401196	1.2887	1.44515	0.615433	1.87155	1.76679	2.14474	0.945642	1.14685	1.47753	1.28909	-0.320123	-0.0847332	0.296507	0.287467	0.0445407	0.359461	0.520972	0.538418
LPL_NM_000237	0.37099	-1.42639	-1.89827	-1.82363	0.0988582	0.262065	0.174534	0.281	0.246876	0.00191635	0.297144	0.667813	0.632393	-0.898172	0.424078	-1.43962	0.373554	1.206	0.261803	0.294909	0.9464	-0.72235	0.49358	-0.929822	0.388622	0.957989	-0.204291	1.03576	0.617863	0.973452	-2.23454	-1.00493	-1.93644	-1.61054	-1.23239	-1.65637	-0.906554	-0.775554	-2.23454	-2.23454	-1.41915	0.862337	0.462392	0.857686	0.0936322	-0.254317	0.871631	0.552623	0.40196
CALCA_NM_001033952	-0.352679	-0.352679	-0.352679	-0.352679	-0.352679	4.07129	3.45467	1.56752	0.139893	-0.352679	-0.352679	-0.352679	-0.352679	-0.352679	-0.352679	-0.352679	-0.352679	-0.352679	-0.352679	1.59187	0.891131	-0.352679	-0.352679	-0.352679	0.472003	1.49773	-0.352679	-0.352679	-0.352679	1.42925	-0.352679	-0.352679	-0.352679	-0.352679	-0.352679	-0.352679	4.28196	-0.352679	-0.352679	-0.352679	-0.352679	-0.352679	-0.352679	-0.352679	-0.352679	-0.352679	-0.352679	-0.352679	-0.352679
MSMB_NM_138634	0.691262	-0.932847	-0.932847	-0.932847	1.63809	2.27609	-0.11959	0.646264	-0.405988	-0.134235	1.08832	0.964311	1.90816	0.701905	1.20369	-0.932847	-0.451223	-0.932847	-0.610479	1.86677	-0.132388	-0.932847	-0.552353	-0.932847	2.08313	2.02645	-0.0588639	-0.932847	0.762662	2.37159	-0.932847	-0.932847	-0.932847	-0.932847	-0.932847	-0.932847	-0.932847	-0.932847	-0.932847	0.470531	-0.932847	-0.932847	-0.932847	-0.291246	0.215465	-0.932847	-0.338349	-0.932847	-0.932847
NEFM_NM_001105541	-0.630546	-0.630546	-0.630546	-0.630546	-0.630546	-0.630546	-0.630546	-0.630546	-0.630546	-0.630546	-0.630546	-0.630546	-0.630546	-0.630546	-0.630546	-0.630546	-0.630546	-0.630546	-0.630546	-0.630546	-0.630546	-0.630546	-0.630546	-0.630546	-0.630546	-0.630546	-0.630546	-0.630546	-0.630546	-0.630546	-0.630546	-0.630546	-0.630546	-0.124797	-0.630546	-0.630546	-0.630546	-0.476042	-0.630546	-0.630546	-0.630546	1.72584	-0.630546	0.905753	-0.630546	-0.630546	2.21358	2.93872	1.14756
SFTPC_NM_001172357	0.625394	-0.742904	-0.742904	-0.742904	-0.742904	-0.742904	0.985432	1.45308	0.887326	-0.742904	1.85476	1.23995	-0.742904	2.60173	-0.742904	-0.742904	0.937023	-0.742904	-0.742904	2.22139	0.188193	0.66247	1.03335	1.50429	0.277908	1.80148	0.0358546	0.594779	-0.120705	1.23109	0.0161249	-0.742904	-0.359703	-0.742904	1.23369	-0.742904	-0.742904	2.35657	-0.742904	-0.742904	-0.340822	0.549676	-0.742904	-0.742904	-0.742904	-0.742904	-0.742904	-0.742904	-0.742904
SFTPA1_NM_001164647	0.6261	-0.771382	-0.771382	-0.771382	-0.771382	-0.771382	0.840358	1.12198	1.08533	-0.771382	1.71294	1.32922	-0.771382	1.95149	-0.771382	-0.771382	1.0731	-0.771382	-0.771382	2.02468	-0.0742851	0.773739	0.617314	1.92051	0.214055	1.93791	0.504137	0.88205	0.222415	1.11182	-0.142874	-0.771382	0.0457182	-0.771382	0.726667	-0.771382	1.64281	2.46358	-0.771382	-0.771382	-0.13984	0.576744	-0.771382	-0.771382	-0.771382	-0.771382	-0.771382	-0.771382	-0.771382
GHRH_NM_001184731	-0.718077	-0.718077	-0.718077	-0.718077	-0.718077	-0.718077	-0.718077	-0.718077	1.86024	-0.718077	-0.718077	0.493297	0.426846	-0.718077	0.261424	-0.718077	-0.194671	0.49674	0.325709	0.880687	-0.718077	-0.718077	2.51546	-0.718077	-0.425491	-0.718077	-0.718077	0.924749	-0.718077	-0.718077	-0.718077	-0.718077	-0.718077	-0.718077	-0.718077	-0.718077	-0.718077	-0.718077	-0.718077	-0.718077	-0.718077	-0.718077	-0.718077	0.65266	1.86166	1.06623	2.25974	1.1935	0.35963
MEG3_NR_003531	0.867656	0.391129	-0.336744	-0.435361	0.823557	0.10115	-0.209045	0.225773	-0.298547	-0.177763	0.202068	-0.44767	1.33956	-0.405435	0.387951	0.0330362	0.367501	-0.311145	0.325312	0.237863	0.0537965	0.188466	0.511988	-1.91496	0.732154	0.316989	0.358394	-0.0258356	-0.297341	0.136091	-2.32294	-2.32294	-2.32294	0.298007	-2.32294	-1.42432	-1.67374	-1.50145	-0.43379	-2.32294	-0.973944	0.370013	0.0321506	0.573626	0.796767	0.96101	0.707216	0.0469921	0.95133
ASCL1_NM_004316	1.38222	1.48343	-0.89625	-0.582544	0.931183	1.53172	1.13911	1.01738	-0.370306	1.16312	0.926977	0.995798	1.03247	0.171043	1.20008	1.15332	1.23171	0.815492	1.06541	1.35015	1.33851	1.27871	0.506734	1.40144	1.20332	0.95864	1.72234	0.495085	1.24843	0.960933	-0.89625	-0.89625	-0.635471	-0.89625	-0.89625	-0.89625	1.25981	-0.89625	-0.89625	-0.89625	-0.89625	-0.89625	-0.89625	-0.273019	-0.89625	-0.89625	-0.89625	-0.89625	-0.89625
LECT1_NM_007015	0.98371	-1.03441	1.25428	0.650231	-1.03441	1.62796	0.532087	0.76296	1.3468	0.486928	-1.03441	1.13223	1.47479	1.33887	1.17958	1.30007	-1.03441	0.63245	0.776484	1.33072	0.628578	-0.77071	-0.124495	1.43647	0.331571	-1.03441	-0.903564	0.654103	1.41892	1.14959	1.32611	-1.03441	-1.03441	-1.03441	-1.03441	-1.03441	1.57633	-0.964512	-0.844645	-1.03441	-1.03441	-1.03441	-0.403555	-1.03441	0.168098	-1.03441	-0.337052	-1.03441	-0.476099
ADCYAP1_NM_001099733	0.339952	-0.837341	-0.837341	-0.837341	-0.837341	1.13771	0.341971	0.388018	0.15299	0.00694759	1.25159	-0.592145	-0.451514	-0.0849517	-0.837341	-0.837341	1.34789	-0.511898	-0.837341	0.791593	1.16612	-0.0806077	-0.837341	1.01823	0.755494	0.866907	-0.837341	-0.837341	1.53822	0.743926	-0.513538	2.38511	0.409563	0.848955	0.425579	2.93157	0.723229	2.1501	1.3684	2.32192	1.63153	-0.837341	-0.837341	-0.837341	-0.837341	-0.222501	-0.837341	-0.837341	-0.358265
OTP_NM_032109	0.757348	-1.8893	-1.8893	-1.8893	0.715329	0.436916	0.235802	0.567253	0.0646248	0.394113	0.489263	0.611364	0.894707	0.320497	0.952714	0.282633	0.577449	0.786806	0.893702	0.64731	0.375794	-0.348471	0.624465	-0.152685	0.674612	0.461824	0.720347	0.899755	0.65787	0.5104	-1.8893	-1.8893	-1.8893	-1.8893	-0.769841	-1.8893	-1.8893	-1.8893	-1.8893	-1.8893	-1.8893	0.205168	0.798449	0.549873	0.416774	0.575247	0.620856	0.0767577	0.701166
NEFM_NM_005382	-0.329074	-0.217113	0.0770003	-1.02475	-0.832254	-1.02475	-1.02475	-0.251042	-1.02475	-0.0789379	-0.787334	-0.129743	-1.02475	-0.835895	-1.02475	0.428222	-1.02475	-0.869557	-1.02475	-1.02475	-1.02475	-1.02475	-1.02475	0.0807532	-1.02475	-0.888318	-1.02475	-0.571991	-0.244106	-1.02475	-0.082861	0.221375	-0.421625	-0.119657	-0.0693904	1.00129	-1.02475	0.722058	0.231737	-0.242621	-0.639175	2.57097	-1.02475	1.88782	-1.02475	-0.951152	1.28221	1.24748	0.877091
IGJ_NM_144646	0.523129	1.38617	-0.882498	1.80764	-0.941161	0.0191635	-0.0648345	0.945704	1.64774	-0.878283	1.65483	-0.4052	-0.941161	0.298509	-0.941161	-0.941161	0.904888	0.248891	-0.405382	1.60661	0.0719702	0.513587	2.07379	1.50667	0.768978	1.70418	0.22162	-0.547597	-0.941161	0.389028	-0.761543	-0.941161	-0.941161	-0.941161	0.126029	-0.422781	2.4413	2.20906	-0.941161	-0.909071	-0.567109	-0.0945749	0.759611	0.386022	-0.941161	-0.941161	-0.941161	-0.941161	0.185085
GP2_NM_001007241	0.334725	-1.35078	-1.35078	-0.168001	0.401293	1.03507	0.304319	1.30131	0.988842	-0.314556	-1.35078	-0.353163	0.161396	0.481134	0.157543	1.20429	1.3959	-1.35078	-1.11488	0.158513	1.47228	-1.35078	-0.356693	1.0977	1.27714	1.24317	0.383033	0.352835	0.668146	1.32584	-1.35078	-1.35078	-1.35078	-1.35078	-0.884383	-0.690245	-1.35078	-1.35078	-1.35078	-1.34809	-1.35078	-1.35078	1.39116	1.00784	1.01379	1.79861	0.618157	-0.027825	0.520718
SERPINA1_NM_001002235	-1.0971	-1.24189	-1.19996	-0.795204	-1.28934	-1.28934	-0.717914	-0.645038	-0.186419	-1.28934	0.144939	-0.640077	-1.28934	-0.555763	-1.28934	-1.28934	-1.14732	-0.865809	-1.28934	0.00660783	-1.28934	-1.28934	-0.357822	-0.258752	-1.20032	-0.922615	-0.634703	-1.28934	-0.690498	-1.06045	-1.28934	0.0321529	0.657624	-0.129441	0.889185	0.400829	1.07417	1.17958	0.432238	1.24531	0.659031	1.29794	0.059414	0.711003	1.6043	1.65587	0.846337	2.41095	0.793586
SMOC1_NM_022137	-1.29027	-1.22248	0.650243	-1.66225	-1.31914	-0.814224	-1.68611	-0.361032	-0.190958	-1.72391	-1.72391	-0.862582	-0.613993	-1.72391	-1.10624	-1.72391	-0.972044	0.679275	-0.652423	-0.701308	-1.14161	-1.72391	-0.507269	-0.545925	-0.191837	-1.72391	-0.243364	-0.367129	-0.500519	-0.937574	-0.302183	0.635104	0.598236	0.593671	0.54075	0.450154	-0.501214	0.591707	0.521682	0.453683	1.22637	1.58706	0.917845	1.01561	0.228903	1.01438	0.548456	1.05635	0.719251
SMOC1_NM_001034852	-1.32817	-1.2697	0.538777	-1.57639	-1.23632	-0.950464	-1.67647	-0.368156	-0.0856967	-1.67647	-1.67647	-0.977718	-0.672895	-1.67647	-1.19014	-1.67647	-0.859729	0.637865	-0.602376	-0.785069	-0.906011	-1.67647	-0.50623	-0.675623	-0.132334	-1.50908	-0.267371	-0.290817	-0.669319	-1.27698	-0.28726	0.518049	0.474758	0.429309	0.509683	0.494274	-0.616318	0.649937	0.543443	0.365309	1.12946	1.62282	0.916013	1.02118	0.242924	0.995067	0.629551	1.10406	0.758734
HMGCS2_NM_005518	-0.938236	-0.938236	-0.938236	-0.938236	-0.938236	-0.938236	-0.938236	-0.938236	-0.938236	-0.938236	-0.938236	-0.938236	-0.938236	-0.938236	-0.938236	-0.938236	-0.938236	-0.938236	-0.72713	-0.938236	-0.938236	-0.938236	-0.397421	-0.938236	-0.938236	-0.938236	-0.938236	-0.938236	-0.938236	-0.938236	-0.938236	0.783496	1.51837	0.989859	1.15949	0.0425557	-0.938236	0.580451	0.753756	1.93709	1.21723	0.177002	0.605784	1.58739	0.719187	0.00720115	0.831162	0.0367326	1.42409
PPP1R1A_NM_006741	-0.0138556	-0.10928	-0.813315	-1.26441	0.277429	-1.27242	-1.27242	0.122323	-1.27242	-1.27242	-1.21996	-0.359459	-1.14775	0.379797	-1.27242	-1.27242	-0.703791	-0.547062	-1.27242	-1.27242	-1.24654	-1.27242	-0.135075	-0.620439	0.0462892	-0.222876	0.160877	0.325327	-1.27242	-1.27242	-1.26228	0.6364	-0.122009	0.257235	-0.690623	-0.283827	-1.07428	-1.01983	-1.27242	-0.514006	0.252458	0.864714	1.13417	1.31231	0.421333	0.606005	1.50386	1.20889	1.28095
SERPINA6_NM_001756	-0.935827	-0.935827	-0.935827	-0.935827	-0.935827	-0.935827	-0.935827	-0.935827	-0.935827	-0.935827	-0.935827	-0.935827	-0.935827	-0.935827	-0.935827	-0.935827	-0.935827	-0.935827	-0.935827	-0.935827	-0.935827	-0.906916	-0.935827	-0.935827	-0.935827	-0.935827	-0.935827	-0.935827	-0.935827	-0.935827	-0.935827	1.70062	1.57981	0.56944	1.06027	-0.0225503	-0.935827	0.306294	0.136943	1.6909	0.726995	1.44929	0.529224	0.794386	1.5545	0.475248	0.317473	1.3308	0.832685
CRYM_NM_001888	0.276497	0.302393	-1.93229	-1.33895	1.07045	0.487728	-0.443642	-0.0839853	-0.287393	1.00064	0.461333	0.642298	0.486892	-0.259948	0.457925	-0.192009	-0.222393	-0.330595	0.566544	1.01793	0.157501	-0.537052	0.156753	0.509782	0.579759	-0.164252	0.921238	-0.195981	0.612464	0.669638	-1.06498	-1.93229	-1.93229	-1.93229	-1.93229	-1.93229	-0.372868	-1.93229	-1.93229	-1.93229	-1.93229	0.395674	-0.5501	1.48845	0.623802	-0.407049	0.416138	0.0995749	1.28032
FGA_NM_021871	-0.407898	-0.407898	-0.407898	-0.407898	-0.407898	-0.407898	-0.407898	-0.407898	-0.407898	-0.407898	-0.407898	-0.407898	-0.407898	-0.407898	-0.407898	-0.407898	-0.407898	-0.407898	-0.407898	-0.407898	-0.407898	-0.407898	-0.407898	-0.407898	-0.407898	-0.407898	-0.407898	-0.407898	-0.407898	-0.407898	-0.407898	0.429313	1.83999	0.142148	1.93813	2.80169	4.08749	1.93762	2.32777	2.70506	2.61205	-0.407898	-0.407898	-0.407898	-0.407898	-0.407898	-0.407898	-0.407898	-0.407898
SLC35D3_NM_001008783	1.17781	0.86525	-1.62523	0.132236	0.636331	1.16219	0.65089	0.325927	-0.383498	0.86594	0.780271	1.13313	0.672586	0.0679547	1.24758	-0.186646	0.782888	0.517832	1.20795	1.36352	0.127852	0.134306	0.544227	0.589307	1.19164	0.849734	0.585899	0.523993	0.676703	0.582587	-1.5236	-2.49049	-2.49049	-2.49049	-1.09038	-2.45474	-0.797327	-1.9861	-0.880766	-2.49049	-1.52024	0.463147	0.141666	0.175497	0.00231632	0.544119	0.219271	0.228252	0.0266101
SYT1_NM_005639	1.7503	0.862208	0.965902	0.858579	1.22715	0.994833	1.04592	0.835933	0.456343	0.820858	0.899236	0.831972	0.420767	-0.752513	0.41932	1.14095	1.1786	0.776603	1.56134	1.30363	0.863938	1.04228	1.39996	0.811912	1.72597	1.09396	0.761266	1.43084	0.841251	0.717732	0.355731	-1.06346	-0.878094	-1.06346	-1.06346	-1.06346	-1.06346	-0.734092	-1.06346	-1.06346	-1.06346	-1.06346	-1.06346	0.898935	-1.06346	-1.06346	-0.470383	-1.06346	-1.06346
GRP_NM_001012512	1.10528	1.8262	-0.815058	-0.567671	0.399383	1.79806	0.889276	1.07869	-0.130198	0.897387	0.780755	0.954047	0.608419	1.67443	0.898702	1.45586	1.205	-0.815058	-0.815058	1.29032	1.78866	0.553136	-0.815058	2.01369	1.07074	1.65119	0.397574	-0.815058	0.846732	1.96625	0.152879	-0.815058	-0.815058	-0.815058	-0.815058	-0.815058	1.29527	-0.815058	-0.815058	-0.815058	-0.815058	-0.815058	0.987231	-0.815058	-0.815058	-0.815058	-0.815058	-0.335053	-0.0251973
HPN_NM_002151	-1.21612	-1.21612	-1.21612	-1.21612	-1.21612	-1.21612	-1.21612	-1.21612	-0.982769	-1.21612	-1.21612	-0.181302	-0.380552	-1.10573	0.140193	-1.21612	-1.21612	-0.332583	0.0704614	-1.21612	-1.21612	-1.21612	-0.881651	-1.21612	-0.21133	-1.21612	-1.21612	0.100985	-1.21612	-1.21612	-0.00178303	1.41992	-1.15274	0.591128	0.810581	0.976502	1.06778	0.405297	-0.0817886	0.81655	0.516276	1.2833	1.05591	1.06201	0.61042	0.34436	1.1054	1.0719	0.95305
MUC13_NM_033049	-0.788037	-0.788037	-0.788037	-0.788037	-0.788037	-0.788037	-0.788037	-0.788037	-0.788037	-0.788037	-0.788037	-0.788037	-0.788037	-0.788037	-0.788037	-0.788037	-0.788037	-0.788037	-0.788037	-0.788037	-0.788037	-0.788037	-0.788037	-0.788037	-0.788037	-0.788037	-0.788037	-0.788037	-0.788037	-0.788037	-0.445888	2.06785	2.22807	1.64388	1.60914	2.07973	0.372	0.456	0.894259	1.94632	2.66942	0.363427	1.56519	0.21941	0.0510316	0.982082	-0.246081	0.591676	0.701674
KIF12_NM_138424	0.0896958	-0.274394	-1.13146	-1.13146	-1.13146	0.0919726	-0.359224	-0.821863	-1.13146	-1.13146	-1.13146	-1.13146	-1.13146	-1.13146	-1.13146	-1.13146	0.260829	-1.13146	-1.13146	-0.266689	-1.13146	-1.13146	-1.13146	-0.932901	-0.837646	-0.991429	0.221968	-1.13146	-1.04871	-1.13146	-1.13146	1.28808	1.8204	1.64489	1.7765	1.62237	-0.290876	1.58211	1.46031	1.10793	1.40515	0.912283	0.410182	0.200076	-0.330724	-0.872521	0.682483	1.11721	0.407591
MB_NM_005368	0.274922	1.45731	-1.24735	0.561947	0.489194	1.11719	0.554056	-0.536423	0.273358	1.04093	-0.67802	1.71178	1.7562	1.26332	1.78298	-1.28608	0.643611	-0.282488	2.00937	1.15659	0.52653	-1.28608	1.5168	1.08825	0.154197	-0.572349	1.27824	1.54588	0.112659	0.950612	-1.28608	-1.28608	-1.28608	-1.28608	-1.28608	-1.28608	-0.267919	-1.28608	-1.28608	-1.28608	-1.28608	-1.28608	0.0678627	-0.299002	0.341858	-1.28608	0.560416	0.37961	-0.514259
SERPINF2_NM_000934	-0.836967	-0.836967	-0.836967	-0.302993	-0.836967	-0.836967	-0.836967	-0.836967	-0.836967	-0.836967	-0.836967	-0.836967	-0.836967	-0.836967	-0.836967	0.0954707	-0.836967	-0.836967	-0.222706	-0.836967	-0.836967	-0.836967	-0.836967	-0.745497	-0.836967	-0.836967	-0.836967	-0.836967	-0.836967	-0.836967	-0.836967	-0.467982	1.82114	0.356195	2.44296	2.10262	-0.0363297	1.93886	2.10091	2.00912	1.44572	0.736635	0.054976	0.772008	0.093112	-0.632456	-0.101968	-0.757894	0.0681794
CALCA_NM_001033953	2.45838	-0.389044	-0.0671613	-0.146574	-0.389044	3.38199	3.04035	-0.286142	-0.389044	-0.389044	-0.389044	-0.389044	-0.389044	-0.389044	-0.156078	-0.389044	1.6102	-0.389044	-0.389044	3.0303	-0.33322	-0.389044	-0.389044	-0.389044	-0.389044	1.93825	-0.389044	-0.389044	-0.389044	0.749727	-0.389044	-0.389044	-0.389044	-0.389044	-0.389044	-0.389044	3.4376	-0.389044	-0.389044	-0.389044	-0.389044	-0.389044	-0.389044	1.1836	-0.389044	-0.389044	-0.389044	-0.389044	-0.389044
GHSR_NM_198407	0.772868	-1.63345	-1.63345	0.520749	0.459487	0.373866	0.534572	-1.55448	0.133507	0.335153	0.358955	0.221586	0.147296	-0.419298	0.094797	0.252229	1.00834	0.228505	0.459876	0.549044	-0.0921342	-1.63345	0.797594	-1.63345	0.194491	0.59644	-0.339281	0.267751	-0.2463	0.153414	-1.63345	-1.63345	-1.63345	-1.63345	-1.63345	-1.63345	-0.842643	-1.63345	-1.63345	-1.63345	-1.63345	1.06197	1.13727	0.901672	1.34878	1.77599	0.216927	0.187917	0.4779
F5_NM_000130	-0.27782	-0.0201508	-1.68864	-1.68684	-1.48007	-0.229427	0.255435	-1.26722	-1.66702	-0.515277	0.159915	-1.68864	-1.68864	-0.403445	-1.24492	-0.910845	0.838949	-1.68864	-1.23814	-1.68864	-0.0676466	-0.309678	-0.245324	0.285058	-1.68864	-0.755274	-1.07282	-1.68864	-0.553335	-1.68864	1.06844	1.04382	1.56611	0.549791	1.05458	0.953934	-0.120281	1.12827	1.04044	0.966451	1.01536	1.04743	0.583026	0.478897	0.159923	0.851296	0.731046	0.710444	0.805797
FGB_NM_005141	-0.376416	-0.376416	-0.376416	-0.376416	-0.376416	-0.376416	-0.376416	-0.376416	-0.376416	-0.376416	-0.376416	-0.376416	-0.376416	-0.376416	-0.376416	-0.376416	-0.376416	-0.376416	-0.376416	-0.376416	-0.376416	-0.376416	0.277777	-0.376416	-0.376416	-0.376416	-0.376416	-0.376416	-0.376416	-0.376416	-0.376416	-0.376416	1.95113	-0.376416	1.1898	3.35058	2.08594	1.57834	2.71675	2.88225	4.10217	-0.376416	-0.376416	-0.376416	-0.376416	-0.376416	-0.376416	-0.376416	-0.376416
SLC6A5_NM_004211	2.13025	-0.545955	-0.545955	-0.181869	1.67104	2.37476	2.0733	0.308054	-0.545955	1.62507	-0.545955	1.09341	0.272786	-0.545955	-0.545955	1.29093	1.8823	-0.545955	-0.545955	2.44	1.51651	-0.545955	-0.545955	-0.545955	1.82843	2.13204	1.93355	-0.545955	-0.545955	1.81528	-0.545955	-0.545955	-0.545955	-0.545955	-0.545955	-0.545955	-0.545955	-0.545955	-0.545955	-0.545955	-0.545955	-0.545955	-0.545955	-0.545955	-0.545955	-0.545955	-0.545955	-0.545955	-0.545955
MGST1_NM_020300	1.59187	-0.148018	-0.953399	2.00768	1.51991	-0.787073	1.03606	1.02584	0.610449	-0.953399	1.36481	0.382117	0.333285	1.5256	-0.0215217	1.53322	1.27367	0.676875	-0.953399	0.600297	0.679354	0.919912	-0.850101	1.9676	-0.253721	1.95082	0.718149	0.516153	0.156946	1.41697	-0.167612	0.438026	-0.416137	-0.953399	-0.479796	-0.953399	1.81861	1.03457	0.78062	0.0930487	-0.953399	-0.953399	-0.953399	0.177768	-0.953399	-0.953399	-0.953399	-0.953399	-0.953399
GC_NM_000583	-0.705268	-0.705268	-0.705268	-0.705268	-0.705268	-0.705268	-0.705268	-0.705268	-0.705268	-0.705268	-0.705268	-0.705268	-0.705268	-0.705268	-0.705268	-0.705268	-0.705268	-0.705268	-0.472711	-0.705268	-0.705268	-0.705268	-0.705268	-0.705268	-0.705268	-0.705268	-0.705268	-0.705268	-0.705268	-0.705268	-0.705268	1.33775	2.35852	0.0829578	1.43213	1.64265	-0.705268	1.0108	1.08491	0.298259	1.45197	0.2945	-0.705268	1.45783	1.91714	1.9465	-0.396452	-0.705268	-0.705268
NPTX1_NM_002522	1.12926	0.122553	-0.55032	0.0241527	0.487562	2.96502	1.80187	3.46153	-0.55032	-0.145466	-0.352823	0.893012	-0.55032	-0.55032	-0.55032	0.0997434	1.60026	-0.55032	-0.55032	1.95087	2.04662	0.699553	-0.55032	-0.319136	1.21859	1.87291	0.655717	-0.55032	0.903429	2.66035	-0.55032	-0.55032	-0.55032	-0.55032	-0.55032	-0.55032	-0.55032	-0.55032	-0.55032	-0.55032	-0.55032	-0.55032	-0.55032	-0.55032	-0.55032	-0.55032	-0.55032	-0.55032	-0.55032
SYT1_NM_001135806	1.23487	0.373967	0.299428	0.205076	0.846051	1.00808	0.976684	0.561034	-0.177811	0.394837	0.172448	1.35861	1.46646	0.326176	1.34965	0.527284	0.799643	1.42454	1.58255	0.984494	0.841113	0.104346	0.908209	0.471376	1.25111	0.778698	-0.0640351	1.00639	0.651986	1.35877	0.208109	-1.21887	-1.21887	-1.1875	-1.21887	-1.21887	-1.21887	-0.37802	-1.21887	-1.21887	-1.21887	-1.21887	-1.21887	0.498576	-1.21887	1.17069	0.491878	-1.21887	-1.21887
KRT7_NM_005556	0.952681	0.599099	0.671823	-0.969008	0.977396	1.87129	0.0883815	1.04803	0.507871	0.628554	0.685901	-0.0917716	0.280543	0.273142	1.52798	-0.969008	1.0768	1.56629	1.88968	2.05375	0.287003	-0.779907	1.65231	1.49105	0.435423	0.822874	1.93686	0.71554	-0.0905658	0.812907	-0.592273	-0.969008	-0.899294	-0.969008	-0.319825	-0.969008	1.70827	0.884848	-0.969008	-0.969008	-0.969008	-0.491238	-0.969008	0.234206	-0.969008	-0.969008	-0.543213	-0.898898	-0.450569
STMN2_NM_007029	0.371555	2.21347	-0.605795	2.50561	1.38338	-0.0219988	-0.605795	-0.605795	-0.605795	-0.605795	1.14367	1.34465	1.84348	1.97392	1.70495	-0.605795	-0.367121	2.10667	2.26376	1.16211	-0.605795	2.27373	-0.605795	1.03393	1.34824	-0.605795	0.315681	-0.131799	0.407219	-0.605795	1.49172	-0.605795	-0.605795	-0.605795	-0.605795	-0.454412	-0.605795	-0.605795	-0.605795	-0.605795	-0.605795	-0.605795	-0.605795	-0.605795	-0.605795	-0.605795	-0.605795	-0.605795	-0.605795
PROC_NM_000312	-1.05397	-0.2904	-1.05397	-0.0689776	-0.85983	-1.05397	-1.05397	-1.05397	-1.05397	-1.05397	-0.961984	-1.05397	-0.948589	-1.05397	-1.05397	-1.05397	-1.05397	-1.05397	-0.644083	-1.05397	-1.05397	-1.05397	-1.05397	-1.05397	-0.94625	-0.901911	-1.05397	-1.05397	-1.05397	-1.05397	-1.05397	0.516343	0.806586	0.959103	1.44576	0.931671	-0.325157	0.861955	0.97367	1.10445	0.809005	0.889875	-0.285989	0.998237	0.325178	0.101123	0.915656	1.71037	0.466526
VIL1_NM_007127	-0.935176	-0.935176	-0.935176	-0.935176	-0.935176	-0.935176	-0.935176	-0.935176	-0.935176	-0.935176	-0.935176	-0.935176	-0.935176	-0.935176	-0.935176	-0.935176	-0.935176	-0.935176	-0.23942	-0.935176	-0.935176	-0.935176	-0.203499	-0.935176	-0.935176	-0.935176	-0.935176	-0.935176	-0.935176	-0.935176	-0.935176	-0.0100617	-0.51461	0.642904	1.24909	0.822127	-0.935176	1.36103	1.74302	0.733916	1.37621	1.28034	-0.155773	1.37005	-0.17926	0.455455	0.559854	0.828256	1.12459
MIAT_NR_033320	1.99552	1.58332	-0.706142	-0.276985	1.60127	1.74639	1.76245	1.2189	-0.706142	1.20884	1.73485	0.987337	1.16961	-0.470668	-0.706142	0.228324	1.53679	-0.180046	0.322861	1.64371	1.54386	2.44281	0.374752	1.36563	0.350897	1.15227	1.65179	-0.706142	0.970892	-0.125837	-0.706142	-0.706142	-0.706142	-0.706142	-0.706142	-0.706142	-0.706142	-0.706142	-0.706142	-0.706142	-0.706142	-0.706142	-0.706142	-0.706142	-0.706142	-0.706142	-0.706142	-0.706142	-0.706142
TMEM114_NM_001146336	-0.466685	-0.529925	-0.529925	-0.529925	2.08629	0.270635	-0.529925	2.24128	-0.529925	1.63844	-0.173932	2.68875	2.04917	1.55319	3.37869	-0.529925	0.260483	-0.529925	1.85136	0.467434	-0.529925	-0.529925	0.0925168	-0.529925	-0.0971108	-0.389314	2.44619	0.238741	2.00761	-0.529925	-0.529925	-0.529925	-0.529925	-0.529925	-0.529925	-0.529925	-0.529925	-0.529925	-0.529925	-0.529925	-0.529925	-0.529925	-0.529925	-0.529925	-0.529925	-0.529925	-0.529925	-0.529925	-0.136057
HGD_NM_000187	-0.99906	-0.99906	-0.99906	-0.99906	-0.99906	-0.99906	-0.99906	-0.99906	-0.99906	-0.99906	-0.99906	-0.99906	-0.99906	-0.99906	-0.99906	-0.99906	-0.99906	-0.99906	-0.99906	-0.99906	-0.99906	-0.99906	-0.99906	-0.99906	-0.99906	-0.99906	-0.99906	-0.99906	-0.99906	-0.99906	-0.99906	1.08861	1.0315	0.584108	0.464733	1.28588	-0.176419	0.788876	1.17019	1.61472	1.49608	0.776628	0.743377	0.801259	1.11036	1.16358	1.1565	0.772577	1.12583
CABP7_NM_182527	1.17601	1.24138	-1.38688	-1.13192	1.12128	1.46073	1.04575	0.211205	0.510484	0.634441	1.36822	0.848176	0.954521	0.583884	0.615583	0.497541	0.796958	0.278489	0.84605	1.39365	-0.255822	-0.0937078	-0.141614	1.18046	0.47294	1.06421	1.22828	0.783849	1.23673	1.09949	-1.38688	-1.38688	-1.38688	-1.38688	-1.38688	-1.38688	-1.38688	-1.38688	-1.38688	-1.38688	-1.38688	-0.727473	-1.38688	0.0634403	-0.335556	-1.19965	0.631662	-0.927392	-0.347918
KRT19_NM_002276	-0.253922	0.360571	0.0298749	0.969863	0.0428189	-0.139409	-0.702172	0.384654	0.670713	-1.0826	0.460358	-0.025877	-1.08623	0.507227	-1.08623	-1.08623	0.456864	-0.470297	-1.08623	0.593568	0.37527	-0.955396	-1.01279	0.635508	0.967409	0.562657	0.870145	-1.08623	0.160237	-0.61261	1.88449	1.10498	1.798	1.76077	1.72877	2.19062	1.70984	1.50532	0.86192	1.66172	1.17077	-0.978531	-1.08623	0.382922	-1.08623	-1.08623	-0.739098	-0.169902	0.298949
DPP4_NM_001935	-0.69018	-0.69018	-0.69018	-0.69018	-0.69018	-0.69018	-0.69018	-0.69018	-0.69018	-0.69018	-0.69018	-0.69018	-0.69018	-0.69018	-0.69018	-0.69018	-0.69018	-0.69018	-0.69018	-0.684375	-0.69018	-0.69018	-0.301544	-0.69018	-0.69018	-0.69018	-0.69018	-0.69018	-0.69018	-0.69018	-0.69018	-0.69018	-0.69018	-0.69018	-0.69018	-0.69018	1.7076	-0.0810766	-0.69018	-0.69018	-0.69018	-0.69018	-0.153456	1.92783	1.33502	1.02844	1.09532	0.681439	1.16262
SEZ6L_NM_021115	1.42224	1.1358	0.0956916	0.713829	1.22152	0.704101	1.36462	1.11204	0.59086	0.903866	0.341174	1.32898	1.61036	1.25047	0.509473	1.10125	1.16666	1.11583	0.127648	0.842545	0.134463	0.741312	0.128074	0.460724	1.08558	1.18999	1.42975	-0.0735281	0.793382	0.680022	-1.38172	-1.38172	-1.38172	-1.38172	-1.38172	-1.38172	-1.08579	-1.38172	-1.38172	-1.38172	-1.38172	-1.38172	-0.667753	-1.38172	-0.450238	0.00267282	0.0756642	-1.38172	0.0501418
NR0B1_NM_000475	1.34566	-0.639543	0.759282	-0.639543	-0.321654	1.34381	1.61024	0.533479	-0.624659	-0.639543	0.0526437	1.17007	1.54524	-0.639543	2.65358	-0.639543	2.25006	1.79087	1.96694	1.41135	0.55636	-0.639543	2.29713	0.0465289	1.83691	0.967937	-0.639543	1.92578	0.0468528	-0.639543	-0.639543	-0.639543	-0.639543	-0.639543	-0.639543	-0.639543	-0.639543	-0.639543	-0.639543	-0.639543	-0.639543	-0.639543	-0.639543	-0.639543	-0.639543	-0.00325625	-0.639543	-0.639543	-0.639543
XIST_NR_001564	1.41541	0.322939	-1.07811	-1.07811	0.848117	1.1971	1.17063	-1.07811	-1.07811	0.921402	0.992561	-1.07811	0.985458	0.776318	0.626648	-1.07811	1.50711	-1.07811	1.01967	1.12613	0.839649	1.55556	1.20463	1.20079	-1.07811	0.930201	-1.07811	0.975469	-1.07811	0.954802	0.774734	-1.07811	-1.07811	-1.07811	-1.07811	0.721892	-1.07811	-1.07811	-1.07811	-1.07811	-1.07811	-1.07811	0.88024	0.330003	-1.07811	-1.07811	0.63229	0.50642	0.647373
SLC26A9_NM_052934	1.95023	-0.554539	-0.651859	-0.651859	1.16596	1.58136	1.35336	1.62812	-0.651859	1.52463	1.97694	1.20573	1.48437	-0.651859	-0.213753	-0.651859	1.67958	0.941628	-0.651859	2.07937	1.5971	0.0593058	-0.651859	0.539398	2.21199	1.56634	1.83226	-0.651859	1.14848	0.916358	-0.651859	-0.651859	-0.651859	-0.651859	-0.651859	-0.651859	-0.651859	-0.451955	-0.651859	-0.651859	-0.651859	-0.651859	-0.651859	-0.651859	-0.651859	-0.651859	-0.651859	-0.651859	-0.651859
CDH17_NM_004063	-0.821045	-0.821045	-0.821045	-0.821045	-0.821045	-0.821045	-0.821045	-0.821045	-0.821045	-0.821045	-0.821045	-0.821045	-0.821045	-0.821045	-0.821045	-0.821045	-0.821045	-0.821045	-0.821045	-0.821045	-0.821045	-0.821045	-0.810295	-0.821045	-0.821045	-0.821045	-0.821045	-0.821045	-0.821045	-0.821045	-0.821045	-0.821045	0.592713	0.490785	1.2954	1.05684	-0.821045	1.63011	2.19562	-0.821045	2.06077	1.33347	0.31658	0.916902	0.805538	0.287794	0.244985	1.7115	0.590043
COL22A1_NM_152888	-0.78256	-0.78256	-0.78256	-0.78256	-0.78256	-0.78256	-0.78256	-0.78256	1.42977	-0.78256	-0.78256	-0.78256	0.877552	-0.78256	0.298264	-0.78256	-0.78256	1.68462	-0.595899	-0.78256	-0.78256	-0.78256	0.259292	-0.78256	0.121258	-0.78256	-0.78256	1.23299	-0.78256	-0.78256	-0.78256	-0.78256	-0.78256	-0.78256	-0.78256	-0.78256	-0.78256	-0.78256	-0.78256	-0.758631	-0.78256	-0.78256	0.763042	0.503395	1.08052	1.36122	-0.78256	0.379188	1.66468
SFTPA1_NM_005411	-0.0935666	-0.548372	-0.548372	-0.548372	-0.548372	-0.548372	1.2819	2.37618	0.696635	-0.548372	2.36152	-0.285432	-0.548372	1.05032	-0.548372	-0.548372	0.495168	-0.548372	-0.548372	2.10286	-0.548372	0.821077	0.308134	2.29347	-0.517368	2.18562	-0.244136	0.645904	-0.548372	1.0109	-0.548372	-0.548372	-0.548372	-0.548372	0.0238306	-0.548372	1.08217	3.37162	-0.548372	-0.548372	-0.548372	-0.548372	-0.548372	-0.548372	-0.548372	-0.548372	-0.548372	-0.548372	-0.548372
EPS8L3_NM_133181	-0.746121	-0.746121	-0.746121	-0.746121	-0.746121	-0.746121	-0.746121	-0.746121	-0.746121	-0.746121	-0.746121	-0.746121	-0.746121	-0.746121	-0.746121	-0.746121	-0.746121	-0.746121	-0.746121	-0.746121	-0.746121	-0.746121	-0.382479	-0.746121	-0.746121	-0.746121	-0.746121	-0.746121	-0.746121	-0.746121	-0.746121	-0.746121	-0.746121	0.516197	0.0446549	-0.746121	-0.746121	-0.746121	-0.746121	-0.746121	-0.366456	-0.474004	-0.0331702	1.65088	0.0287205	0.240284	1.28978	0.970056	0.886016
GDF10_NM_004962	2.3143	-0.638952	-0.638952	-0.638952	2.09502	1.46994	-0.239884	1.60517	1.91536	-0.229469	-0.638952	2.11948	2.14327	-0.638952	-0.638952	-0.638952	0.126636	1.17811	-0.638952	2.0899	-0.638952	-0.638952	-0.638952	-0.638952	2.1103	1.84669	-0.213199	-0.638952	1.83216	0.952006	-0.638952	-0.638952	-0.638952	-0.638952	-0.638952	-0.638952	-0.638952	0.0410621	-0.638952	-0.638952	-0.638952	-0.0318182	-0.638952	-0.638952	-0.248313	-0.638952	-0.638952	-0.638952	-0.638952
HMGCS2_NM_001166107	-0.42261	-0.42261	-0.42261	-0.42261	-0.42261	-0.42261	-0.42261	-0.42261	-0.42261	-0.42261	-0.42261	-0.42261	-0.42261	-0.42261	-0.42261	-0.42261	-0.42261	-0.42261	-0.42261	-0.42261	-0.42261	-0.42261	-0.42261	-0.42261	-0.42261	-0.42261	-0.42261	-0.42261	-0.42261	-0.42261	-0.42261	-0.42261	-0.42261	3.16714	-0.42261	-0.42261	-0.42261	-0.42261	-0.42261	-0.42261	-0.42261	-0.42261	-0.42261	-0.42261	-0.42261	-0.42261	2.32699	2.92246	-0.28547
DRD2_NM_000795	1.36818	0.740193	-0.874849	0.0586626	1.11268	1.58703	1.38235	1.20628	0.854375	1.46741	0.933691	1.05624	0.731779	0.917071	0.29018	1.5762	1.34521	1.23126	0.49098	1.38738	0.726021	-0.0875407	1.01334	1.33361	1.12807	1.23941	1.68986	0.939766	1.54254	0.970832	0.386642	-0.874849	-0.874849	-0.874849	-0.874849	-0.874849	-0.874849	-0.874849	-0.874849	-0.874849	-0.874849	-0.874849	-0.874849	-0.874849	-0.874849	-0.874849	-0.874849	-0.874849	-0.874849
MEG3_NR_033360	0.783943	0.446412	0.658224	-1.08509	-0.499438	0.515499	-0.624848	-0.00208104	-0.378793	0.0333327	0.904511	-1.31249	0.634384	-2.13945	1.241	-0.583903	1.04226	0.614911	0.0342099	0.233236	-0.0421913	-1.68819	0.633715	-0.146811	0.997474	-1.07792	-0.436964	-0.984684	-0.770382	-0.950797	-2.23096	-2.23096	0.234452	0.867578	-1.19119	-0.480697	-1.0017	-2.23096	-0.445373	-2.23096	0.237123	0.494476	0.0805585	1.06305	1.05816	-0.79405	0.0303958	0.736931	1.10998
NOS1_NM_000620	0.0829873	-0.562212	-0.562212	-0.562212	1.64743	0.192067	-0.351663	3.57946	1.92378	1.48674	0.228014	0.704553	-0.562212	-0.562212	-0.562212	-0.0549605	-0.316291	-0.562212	1.66847	1.46988	3.28051	-0.562212	1.30023	-0.562212	0.97402	2.01559	1.50697	1.1706	1.49232	0.162874	-0.562212	-0.562212	-0.562212	-0.562212	-0.562212	-0.562212	-0.562212	-0.562212	-0.562212	-0.562212	-0.562212	-0.562212	-0.562212	-0.562212	-0.562212	-0.19362	-0.562212	-0.562212	-0.562212
SERPINF2_NM_001165921	-0.538475	-0.538475	-0.538475	-0.538475	-0.538475	-0.538475	-0.538475	-0.538475	-0.538475	-0.538475	-0.538475	-0.538475	-0.538475	-0.538475	-0.538475	-0.538475	-0.538475	-0.538475	-0.538475	-0.538475	-0.538475	-0.538475	-0.538475	-0.538475	-0.538475	-0.538475	-0.538475	-0.538475	-0.538475	-0.538475	-0.538475	-0.538475	-0.538475	2.56098	0.187758	0.109293	0.113573	0.156855	-0.206647	-0.0862366	-0.538475	-0.538475	-0.538475	-0.538475	-0.538475	-0.538475	1.75698	3.07195	0.0140958
MEG3_NR_003530	1.26877	-0.289095	0.0344121	-0.912007	0.952829	0.482149	0.594558	1.6175	0.479565	-0.302829	0.484396	-1.37447	0.735358	-1.80117	0.04151	0.0465493	1.21165	-0.0952063	0.272116	0.30821	0.191722	0.42367	0.421185	-0.76398	0.643441	-0.0164581	0.466534	-0.0451547	-0.00757223	-0.144344	-1.80117	-1.80117	-0.556258	0.0388473	-1.44656	-1.20548	-0.34154	-1.80117	-0.0660005	-1.80117	-0.110396	-0.111069	0.116265	0.223327	1.33017	1.22484	-0.471145	-1.80117	-0.538388
ADCYAP1_NM_001117	0.812709	-0.751047	-0.751047	-0.751047	-0.751047	1.84565	1.11234	0.0219949	-0.751047	0.368334	1.56009	-0.751047	0.314878	0.142363	-0.485418	-0.751047	1.30011	-0.751047	-0.751047	0.327375	1.15226	-0.084615	-0.751047	0.729777	-0.157859	0.309836	0.117996	-0.751047	1.89002	0.242561	-0.751047	2.49961	0.666708	2.89732	-0.3734	1.62354	1.01391	1.92641	1.28147	1.58598	1.476	-0.751047	-0.751047	-0.751047	-0.751047	-0.64503	-0.751047	-0.751047	-0.751047
LECT1_NM_001011705	0.948207	-0.820778	1.35296	0.368468	-0.820778	1.99618	-0.109663	0.821579	1.40087	-0.141433	-0.820778	1.17208	1.73379	1.50485	1.18009	1.49842	-0.820778	0.536984	0.80575	1.36031	0.456643	-0.820778	-0.820778	1.71528	0.168873	-0.820778	-0.820778	0.26995	1.63666	1.15789	1.49043	-0.820778	-0.820778	-0.820778	-0.820778	-0.820778	1.87593	-0.820778	-0.820778	-0.820778	-0.820778	-0.820778	-0.820778	-0.820778	-0.491197	-0.820778	-0.820778	-0.820778	-0.820778
NKX2-1_NM_003317	0.988223	0.867628	-1.32633	0.736469	1.02573	1.16093	0.973128	1.5276	0.715176	0.951937	0.447185	0.952101	0.384224	0.856526	0.682826	1.22794	1.09664	-1.32633	0.366255	1.16887	1.27489	0.919704	0.0900698	0.270891	0.579173	0.953347	1.24427	-0.530662	1.11695	1.30992	-1.32633	-1.32633	-1.32633	-1.32633	-1.32633	-1.32633	1.92823	-0.0555532	-1.32633	-1.32633	-1.32633	0.209637	0.157426	-0.0263916	-1.32633	-1.32633	-0.316916	-1.21446	-0.037811
NKX2-1_NM_001079668	0.528788	0.698685	-1.37066	0.246509	0.681342	0.480036	0.364369	0.882461	0.557547	0.997237	0.276315	1.38812	1.15011	1.69146	1.23446	1.12052	0.741584	-1.37066	0.223898	0.939571	0.945831	-0.158565	0.0408359	-0.359363	0.826765	1.07265	1.1941	-0.711602	0.949202	1.29983	-1.37066	-1.37066	-1.37066	-1.37066	-1.37066	-1.37066	1.19256	-0.795131	-1.37066	-1.37066	-1.37066	0.267529	0.490791	0.142815	-1.37066	-1.37066	0.734761	0.774682	0.472287
EPS8L3_NM_139053	-0.695691	-0.695691	-0.695691	-0.695691	-0.695691	-0.695691	-0.695691	-0.695691	-0.695691	-0.695691	-0.695691	-0.695691	-0.695691	-0.695691	-0.695691	-0.695691	-0.695691	-0.695691	-0.695691	-0.695691	-0.695691	-0.695691	-0.695691	-0.695691	-0.695691	-0.695691	-0.695691	-0.695691	-0.695691	-0.695691	-0.695691	-0.695691	-0.695691	0.234238	-0.695691	-0.695691	-0.695691	-0.695691	-0.695691	-0.695691	-0.420992	-0.695691	-0.422723	1.81919	0.431197	-0.117081	1.3677	1.18135	1.23389
GP2_NM_001007240	0.33645	-0.795468	-0.795468	-0.0265528	-0.00172691	1.21278	0.60227	2.10933	1.28672	-0.233426	-0.795468	-0.795468	-0.795468	-0.0590641	-0.795468	2.38235	1.74187	-0.795468	-0.795468	0.0623037	1.77699	-0.795468	-0.642759	1.84848	1.41109	1.38125	-0.0111923	-0.0546764	1.50013	0.828998	-0.795468	-0.795468	-0.795468	-0.795468	-0.795468	-0.631916	-0.795468	-0.795468	-0.795468	-0.795468	-0.795468	-0.795468	1.60096	0.871275	1.14142	2.37779	-0.610102	-0.795468	-0.440882
SFTPA1_NM_001093770	0.0679908	-0.545256	-0.545256	-0.545256	-0.545256	-0.545256	1.39819	2.02605	0.706323	-0.545256	2.49857	0.547844	-0.545256	1.66816	-0.545256	-0.545256	0.309389	-0.545256	-0.545256	2.45664	-0.139278	0.688754	0.300967	1.77421	-0.545256	0.390999	-0.067374	0.254144	-0.545256	0.998504	-0.545256	-0.545256	-0.545256	-0.545256	0.515822	-0.545256	0.640963	3.80734	-0.545256	-0.545256	-0.545256	-0.545256	-0.545256	-0.545256	-0.545256	-0.545256	-0.545256	-0.545256	-0.545256
AMPH_NM_139316	1.04027	1.2305	0.368039	0.475773	1.01146	1.49644	0.739012	0.996342	0.378751	1.21563	1.82812	1.12486	0.580937	0.255326	1.43043	0.212836	0.814301	-0.476064	1.6298	1.59508	1.19838	0.604799	1.59084	0.977199	1.14599	0.675185	1.41956	1.22141	1.68514	0.984158	0.393424	-0.912885	-0.912885	-0.912885	-0.912885	-0.912885	-0.912885	-0.912885	-0.912885	-0.912885	-0.912885	-0.912885	-0.912885	-0.912885	-0.912885	-0.912885	-0.615253	-0.912885	-0.912885
MEG3_NR_033359	0.871725	0.462104	-0.754792	-0.863107	0.53186	-0.0197123	0.0339028	0.757884	-1.28053	-0.605581	0.307794	-1.79314	0.285255	-1.97059	0.662112	0.475398	0.816753	0.255184	0.49944	-0.0921143	-0.936605	0.231959	0.80751	-0.862033	1.22649	-0.774826	-0.17703	0.357022	-1.00258	-0.606013	-1.97059	-1.97059	-0.629602	-0.0536785	-0.565759	-1.27776	-1.07904	-1.97059	0.0149433	-1.97059	0.0200878	0.592364	-0.515669	0.851345	1.37268	0.269597	0.127318	-0.546244	1.14613
CEACAM1_NM_001712	-1.0336	-1.0336	-1.0336	-1.0336	-1.0336	-1.0336	-1.0336	-1.0336	-1.0336	-1.0336	-1.0336	-1.0336	-1.0336	-1.0336	-1.0336	-1.0336	-1.0336	-1.0336	-0.365504	-1.0336	-1.0336	-1.0336	-1.01152	-1.0336	-1.0336	-1.0336	-1.0336	-1.0336	-0.988243	-1.0336	-0.496975	0.31363	0.443437	0.316192	1.56518	1.23192	0.950136	1.06914	1.33728	0.370809	1.5703	1.44486	0.414529	1.28167	0.607627	0.326924	0.90357	0.757779	0.907343
GHSR_NM_004122	0.54114	-1.13617	-1.13617	0.939989	0.229197	1.17411	1.72276	-1.13617	0.0105786	0.245289	0.601973	-0.142654	-0.310828	-1.13617	-0.516868	0.466962	0.693164	-0.848564	1.51484	0.465408	1.40206	-1.13617	0.754828	-1.13617	0.23257	0.779084	-0.863621	-0.329108	-0.305154	-1.13617	-1.13617	-1.13617	-1.13617	-1.13617	-1.13617	-1.13617	-1.13617	-1.13617	-1.13617	-1.13617	-1.13617	1.48177	1.3602	0.983202	0.96212	2.04566	-0.288581	-0.591576	-0.235486
SEZ6L_NM_001184773	1.60201	1.37382	0.252224	0.774956	1.31459	0.838966	1.64148	1.22799	0.494056	0.911966	0.0090832	1.67191	1.87947	1.35922	0.442505	1.24647	1.35474	1.04078	0.157062	0.899634	-0.248989	0.813652	0.134117	0.260224	1.38455	1.34395	1.48654	-0.342359	0.656457	0.64077	-1.17253	-1.17253	-1.17253	-1.17253	-1.17253	-1.17253	-1.17253	-1.17253	-1.17253	-1.17253	-1.17253	-1.17253	-0.770887	-1.17253	-0.95272	0.111707	-0.556137	-1.17253	-0.280693
EPS8L3_NM_024526	-0.675658	-0.675658	-0.675658	-0.675658	-0.675658	-0.675658	-0.675658	-0.675658	-0.675658	-0.675658	-0.675658	-0.675658	-0.675658	-0.675658	-0.675658	-0.675658	-0.675658	-0.675658	-0.675658	-0.675658	-0.675658	-0.675658	-0.675658	-0.675658	-0.675658	-0.675658	-0.675658	-0.675658	-0.675658	-0.675658	-0.675658	-0.675658	-0.675658	-0.367839	-0.675658	-0.675658	-0.675658	-0.675658	-0.675658	-0.675658	-0.675658	-0.675658	-0.552691	1.93585	0.127439	-0.0988379	1.47486	1.28355	1.13948
MIAT_NR_033321	2.94542	0.969773	-0.572029	-0.572029	2.15617	0.469048	1.03942	0.675211	-0.572029	1.03409	1.95492	1.18227	1.03261	-0.572029	-0.572029	0.340068	2.11383	-0.572029	-0.572029	1.4186	1.10209	3.61185	-0.572029	1.53824	0.0487806	1.10222	1.19335	-0.572029	-0.18666	-0.572029	-0.572029	-0.572029	-0.572029	-0.572029	-0.572029	-0.572029	-0.572029	-0.572029	-0.572029	-0.572029	-0.572029	-0.572029	-0.572029	-0.572029	-0.572029	-0.572029	-0.572029	-0.572029	-0.572029
MIAT_NR_003491	2.37102	1.32321	-0.591085	-0.591085	1.73975	1.89011	1.74709	0.229388	-0.591085	0.741935	2.11864	0.890871	0.12256	-0.591085	-0.591085	-0.591085	1.47131	-0.591085	-0.413807	1.6353	1.60997	3.33361	-0.248096	1.53983	0.361148	1.26252	1.47845	-0.591085	0.802918	-0.591085	-0.591085	-0.591085	-0.591085	-0.591085	-0.591085	-0.591085	-0.591085	-0.591085	-0.591085	-0.591085	-0.591085	-0.591085	-0.591085	-0.591085	-0.591085	-0.591085	-0.591085	-0.591085	-0.591085
SEZ6L_NM_001184774	1.59016	1.18737	-0.0798272	0.702146	1.11916	0.813439	1.06791	1.15744	0.345094	1.1273	-0.193353	1.60845	1.83856	0.712686	0.623377	1.3589	1.17484	1.45907	0.130909	0.941534	-0.0511733	1.3174	0.060253	-0.0235878	1.59643	1.8164	1.28934	-1.03915	-0.287277	0.673285	-1.11892	-1.11892	-1.11892	-1.11892	-1.11892	-1.11892	-1.11892	-1.11892	-1.11892	-1.11892	-1.11892	-1.11892	-0.464705	-1.11892	-1.04013	-0.419784	-0.7988	-1.11892	-0.00221249
HNF4A_NM_175914	-0.999432	-0.999432	-0.999432	-0.999432	-0.999432	-0.999432	-0.999432	-0.999432	-0.999432	-0.999432	-0.999432	-0.999432	-0.999432	-0.999432	-0.999432	-0.999432	-0.999432	-0.999432	-0.128813	-0.999432	-0.999432	-0.999432	-0.08533	-0.999432	-0.999432	-0.999432	-0.999432	-0.999432	-0.999432	-0.999432	-0.999432	0.191182	0.329819	-0.434041	1.0785	0.657772	-0.999432	1.1274	1.04966	0.53047	0.539693	1.30187	1.19981	1.61943	1.01887	1.43963	1.0114	0.117979	1.23419
MB_NM_203377	1.37963	-0.22396	-0.23582	0.745414	1.72388	1.4108	1.66531	1.19751	0.189858	1.43027	-1.00292	1.58954	1.38384	1.72594	1.00098	-1.08071	0.73477	-0.708041	0.956973	0.822311	0.60357	-1.08071	0.803466	1.49878	-0.443868	0.845963	1.88442	1.19025	-0.108068	0.38021	-1.08071	-1.08071	-1.08071	-1.08071	-1.08071	-1.08071	-0.987403	-1.08071	-1.08071	-1.08071	-1.08071	-1.08071	-0.372725	-0.543149	1.01791	-1.08071	0.213714	-1.08071	-0.618548
AMPH_NM_001635	1.08906	0.414816	1.32686	-0.0736132	1.91155	0.842287	1.8709	0.433018	1.2206	1.75974	1.56071	1.93254	-0.60798	0.318055	0.998826	1.63614	0.778714	-0.189118	1.36892	1.1623	0.721965	0.482521	1.51455	-0.817327	0.886195	1.23694	0.906469	0.800451	0.84837	0.858594	1.18829	-0.835912	-0.835912	-0.835912	-0.835912	-0.835912	-0.835912	-0.835912	-0.835912	-0.835912	-0.835912	-0.835912	-0.835912	-0.835912	-0.835912	-0.801238	-0.835912	-0.835912	-0.835912
SERPINF2_NM_001165920	-0.689801	-0.689801	-0.689801	-0.689801	-0.689801	-0.689801	-0.689801	-0.689801	-0.689801	-0.689801	-0.689801	-0.689801	-0.689801	-0.689801	-0.689801	-0.689801	-0.689801	-0.689801	-0.689801	-0.689801	-0.689801	-0.689801	-0.689801	-0.689801	-0.689801	-0.689801	-0.689801	-0.689801	-0.689801	-0.689801	-0.689801	-0.689801	1.19493	1.87545	2.91348	2.13588	1.02732	1.82509	1.77125	2.20518	0.626434	-0.228852	-0.689801	-0.484807	-0.616831	-0.689801	1.2749	0.592533	-0.689801
HPN_NM_182983	-0.918999	-0.918999	-0.918999	-0.918999	-0.918999	-0.918999	-0.918999	-0.918999	-0.918999	-0.918999	-0.918999	-0.918999	-0.918999	-0.918999	-0.644939	-0.918999	-0.918999	-0.918999	-0.553705	-0.918999	-0.918999	-0.918999	-0.918999	-0.918999	-0.918999	-0.918999	-0.918999	-0.918999	-0.918999	-0.918999	-0.744824	1.78998	-0.918999	0.772169	1.47288	1.34118	1.83863	0.854063	-0.129262	1.36247	0.477316	1.28769	1.19121	1.10526	1.07479	-0.275702	0.95347	0.139663	0.9329
CEACAM1_NM_001024912	-0.878271	-0.878271	-0.878271	-0.878271	-0.878271	-0.878271	-0.878271	-0.878271	-0.878271	-0.878271	-0.878271	-0.878271	-0.878271	-0.878271	-0.878271	-0.878271	-0.878271	-0.878271	-0.878271	-0.878271	-0.878271	-0.878271	-0.878271	-0.878271	-0.878271	-0.878271	-0.878271	-0.878271	-0.878271	-0.878271	-0.62513	1.12558	1.20525	0.51224	-0.462031	-0.878271	0.538944	0.131181	-0.114237	1.27865	1.13093	1.63478	0.0193096	0.447579	1.23625	-0.80189	-0.543663	1.20711	1.46937
SEZ6L_NM_001184777	0.476794	0.226081	-0.186953	-0.670899	1.42464	-0.670899	1.12598	0.423191	-0.670899	1.38126	-0.397455	2.91386	2.93241	0.528501	1.33257	0.400352	0.26798	0.870774	-0.670899	-0.0635305	-0.670899	1.49593	-0.670899	-0.670899	0.9102	0.837782	0.839099	-0.670899	-0.670899	0.459345	-0.670899	-0.670899	-0.670899	-0.670899	-0.670899	-0.670899	-0.670899	-0.670899	-0.670899	-0.670899	-0.670899	-0.670899	-0.670899	-0.670899	-0.670899	-0.670899	0.713488	-0.670899	-0.0184969
DRD2_NM_016574	1.06027	1.02122	-0.777556	-0.777556	1.38255	1.88748	1.60905	1.4773	0.961498	1.31352	0.254835	1.15884	1.18845	1.91319	0.610441	1.58705	1.73861	1.40809	-0.777556	1.7818	-0.187963	-0.777556	1.01337	0.343729	0.610398	1.09183	1.70082	0.10506	1.29111	1.02775	0.196845	-0.777556	-0.777556	-0.777556	-0.777556	-0.777556	-0.777556	-0.777556	-0.777556	-0.777556	-0.777556	-0.777556	-0.777556	-0.777556	-0.777556	-0.777556	-0.777556	-0.777556	-0.777556
CEACAM1_NM_001184813	-0.820433	-0.820433	-0.820433	-0.820433	-0.820433	-0.820433	-0.820433	-0.820433	-0.820433	-0.820433	-0.820433	-0.820433	-0.820433	-0.820433	-0.820433	-0.820433	-0.820433	-0.820433	-0.820433	-0.820433	-0.820433	-0.820433	-0.820433	-0.820433	-0.820433	-0.820433	-0.478085	-0.820433	-0.820433	-0.820433	-0.820433	0.778218	-0.684031	2.57328	2.09669	1.70224	-0.685458	1.05073	0.36119	1.48647	2.09094	0.823216	-0.750886	0.982558	0.926759	0.868179	0.855294	-0.780846	0.605071
SFTPA1_NM_001164645	-0.344029	-0.344029	-0.344029	-0.344029	-0.344029	-0.344029	0.31101	1.31771	-0.344029	-0.344029	1.6014	-0.344029	-0.344029	4.66109	-0.344029	-0.344029	-0.344029	-0.344029	-0.344029	2.28851	-0.344029	-0.344029	-0.344029	1.06199	-0.344029	-0.344029	-0.344029	-0.344029	-0.344029	-0.344029	-0.344029	-0.344029	-0.344029	-0.344029	-0.344029	-0.344029	-0.344029	3.94758	-0.344029	-0.344029	-0.344029	-0.344029	-0.344029	-0.344029	-0.344029	-0.344029	-0.344029	-0.344029	-0.344029
HNF4A_NM_001030003	-0.804351	-0.804351	-0.804351	-0.804351	-0.804351	-0.804351	-0.804351	-0.804351	-0.804351	-0.804351	-0.804351	-0.804351	-0.804351	-0.804351	-0.804351	-0.804351	-0.804351	-0.804351	-0.804351	-0.804351	-0.804351	-0.804351	-0.804351	-0.804351	-0.804351	-0.804351	-0.804351	-0.804351	-0.804351	-0.804351	-0.804351	-0.804351	-0.804351	0.905806	-0.359852	-0.507447	-0.804351	0.0841443	0.427503	-0.0408092	-0.66859	0.885181	0.843748	1.87915	0.374883	1.32166	1.35241	2.08987	0.986984
SFTPA1_NM_001164646	-0.150407	-0.150407	-0.150407	-0.150407	-0.150407	-0.150407	-0.150407	-0.150407	-0.150407	-0.150407	-0.150407	1.76451	-0.150407	7.71111	-0.150407	-0.150407	-0.150407	-0.150407	-0.150407	-0.150407	-0.150407	-0.150407	-0.150407	-0.150407	-0.150407	-0.150407	-0.150407	-0.150407	-0.150407	-0.150407	-0.150407	-0.150407	-0.150407	-0.150407	-0.150407	-0.150407	-0.150407	-0.150407	-0.150407	-0.150407	-0.150407	-0.150407	-0.150407	-0.150407	-0.150407	-0.150407	-0.150407	-0.150407	-0.150407
HNF4A_NM_000457	-0.434546	-0.434546	-0.434546	-0.434546	-0.434546	-0.434546	-0.434546	-0.434546	-0.434546	-0.434546	-0.434546	-0.434546	-0.434546	-0.434546	-0.434546	-0.434546	-0.434546	-0.434546	-0.434546	-0.434546	-0.434546	-0.434546	-0.434546	-0.434546	-0.434546	-0.434546	-0.434546	-0.434546	-0.434546	-0.434546	-0.434546	-0.434546	-0.434546	-0.434546	-0.0515611	-0.434546	-0.434546	-0.434546	3.49824	-0.434546	1.55064	0.689364	-0.0279013	1.28532	-0.434546	0.0626189	-0.434546	-0.434546	0.618017
CEACAM1_NM_001184816	-0.636779	-0.636779	-0.636779	-0.636779	-0.636779	-0.636779	-0.636779	-0.636779	-0.636779	-0.636779	-0.636779	-0.636779	-0.636779	-0.636779	-0.636779	-0.636779	-0.636779	-0.636779	-0.636779	-0.636779	-0.636779	-0.636779	-0.636779	-0.636779	-0.636779	-0.636779	-0.636779	-0.636779	-0.636779	-0.636779	-0.636779	2.08835	0.506866	3.36438	0.62803	0.0716811	-0.636779	-0.636779	-0.636779	1.9674	0.247243	0.353535	-0.636779	-0.636779	1.72164	-0.636779	-0.00520009	1.45416	2.10925
SEZ6L_NM_001184776	-0.254598	0.234884	-0.723769	-0.723769	0.653287	0.672483	1.22037	-0.723769	-0.541128	1.17577	-0.723769	2.6403	2.77611	1.90026	0.928884	0.780038	0.165743	1.81826	0.0794211	0.160924	-0.723769	0.400432	-0.723769	-0.723769	1.08172	1.19201	1.64988	-0.723769	0.0605387	0.797139	-0.723769	-0.723769	-0.723769	-0.723769	-0.723769	-0.723769	-0.723769	-0.723769	-0.723769	-0.723769	-0.723769	-0.723769	-0.723769	-0.723769	-0.723769	-0.723769	1.06809	-0.723769	-0.14473
MGST1_NM_145791	1.28176	-0.494702	-0.494702	3.2753	2.57192	-0.354862	1.89702	1.31435	-0.494702	-0.494702	1.00878	-0.494702	-0.494702	0.492701	-0.494702	1.73388	1.64946	-0.494702	-0.494702	-0.494702	0.550438	-0.494702	-0.494702	3.05333	-0.494702	2.56663	-0.0553205	-0.494702	-0.494702	0.948614	-0.494702	-0.494702	-0.494702	-0.494702	-0.494702	-0.494702	1.92336	-0.494702	-0.11169	-0.494702	-0.494702	-0.494702	-0.494702	-0.494702	-0.494702	-0.494702	-0.494702	-0.494702	-0.494702
MIAT_NR_033319	3.71841	-0.310611	-0.310611	-0.310611	2.08887	-0.310611	-0.310611	-0.310611	-0.310611	-0.310611	2.02894	0.406989	-0.310611	-0.310611	-0.310611	-0.310611	1.63155	-0.310611	-0.310611	0.118868	-0.224744	5.63912	-0.310611	1.2195	-0.310611	0.45609	-0.310611	-0.310611	-0.310611	-0.310611	-0.310611	-0.310611	-0.310611	-0.310611	-0.310611	-0.310611	-0.310611	-0.310611	-0.310611	-0.310611	-0.310611	-0.310611	-0.310611	-0.310611	-0.310611	-0.310611	-0.310611	-0.310611	-0.310611
FGA_NM_000508	-0.310213	-0.310213	-0.310213	-0.310213	-0.310213	-0.310213	-0.310213	-0.310213	-0.310213	-0.310213	-0.310213	-0.310213	-0.310213	-0.310213	-0.310213	-0.310213	-0.310213	-0.310213	-0.310213	-0.310213	-0.310213	-0.310213	-0.310213	-0.310213	-0.310213	-0.310213	-0.310213	-0.310213	-0.310213	-0.310213	-0.310213	-0.310213	1.46518	-0.310213	0.151632	3.95592	5.11722	1.68229	2.01175	2.69636	0.601777	-0.310213	-0.310213	-0.310213	-0.310213	-0.310213	-0.310213	-0.310213	-0.310213
SERPINA1_NM_001127706	-0.520523	-0.520523	-0.520523	-0.520523	-0.520523	-0.520523	-0.520523	-0.520523	-0.520523	-0.520523	0.324646	-0.520523	-0.520523	-0.520523	-0.520523	-0.520523	-0.520523	-0.520523	-0.520523	-0.520523	-0.520523	-0.520523	-0.520523	1.34093	-0.520523	0.294105	-0.520523	-0.520523	-0.520523	-0.520523	-0.520523	-0.520523	-0.0714142	-0.520523	-0.520523	-0.520523	1.09199	3.36293	-0.119705	0.657345	-0.520523	2.81945	-0.137394	-0.520523	2.14848	2.28778	-0.520523	-0.520523	-0.520523
SERPINA1_NM_001127707	-0.421293	-0.421293	-0.421293	-0.421293	-0.421293	-0.421293	-0.421293	-0.421293	-0.421293	-0.421293	-0.421293	-0.421293	-0.421293	-0.421293	-0.421293	-0.421293	-0.421293	-0.421293	-0.421293	-0.421293	-0.421293	-0.421293	-0.421293	0.575921	-0.421293	0.531724	-0.421293	-0.421293	-0.421293	-0.421293	-0.421293	-0.421293	-0.421293	-0.421293	-0.421293	-0.421293	0.772102	3.0993	-0.421293	0.176477	-0.421293	2.89341	-0.421293	-0.421293	1.48837	2.60093	-0.421293	-0.421293	-0.421293
CFC1B_NM_001079530	-0.247878	-0.247878	-0.247878	-0.247878	-0.247878	-0.247878	-0.247878	-0.247878	-0.247878	-0.247878	-0.247878	-0.247878	-0.247878	-0.247878	-0.247878	-0.247878	-0.247878	-0.247878	-0.247878	-0.247878	-0.247878	-0.247878	-0.247878	-0.247878	-0.247878	-0.247878	-0.247878	-0.247878	-0.247878	-0.247878	-0.247878	0.226306	5.35049	-0.247878	-0.247878	4.5039	-0.247878	-0.177727	-0.247878	2.70106	2.02075	-0.247878	-0.247878	-0.247878	-0.247878	-0.247878	-0.247878	-0.247878	-0.247878
[truncated: 16 more columns]
