# Supplementary material for: Integrative Genomic Characterization Identifies Molecular Subtypes of Lung Carcinoids
Source: Oxford University Press journal article supplement (doi:10.1158/0008-5472.can-19-0214), 2019-07-12
Supplement: 00085472can190214-sup-215659_2_supp_5607914_ptl540.xlsx [file 00085472can190214-sup-215659_2_supp_5607914_ptl540.xlsx]

## Sheet: TMA 173 samples
Supplementary File 6: Tissue Microarray (TMA) on 173 Lung Carcinoids for ASCL1 and S100
S-100	ASCL1	S100 ASCL1 Combo	Tumor Number	CentPerpOnly	Dx	Age	Sex	Site	Size (cm)	Survival to Death	Status Alive Dead	AJCCStage
Negative	Negative	S100 ASCL1 both neg	Tumor 1	Central	TC	59	Female	LUL	1.1	6.02053	Alive	2A
Negative	Negative	S100 ASCL1 both neg	Tumor 1	Mid or Peripheral	TC	55	Male	RML	2.5	3.38946	Alive	1A
Negative	Negative	S100 ASCL1 both neg	Tumor 1	Central	TC	49	Male	RML	4.5	2.81177	Alive	1B
Negative	Negative	S100 ASCL1 both neg	Tumor 1	Central	TC	53	Male	LLL	1.3	0.0383299	Uknown	1B
Negative	Negative	S100 ASCL1 both neg	Tumor 1	Mid or Peripheral	TC	37	Female	RLL	3.5	8.49008	Alive	3A
Positive	Positive	S100 Pos ASCL1 pos	Tumor 1	Central	TC	85	Female	RML	3.7	7.18138	Alive	1B
Negative	Positive	S100 Neg ASCL1 Pos	Tumor 1	Mid or Peripheral	TC	59	Female	Lingula	0.9	1.51677	Alive	1A
Positive	Negative	S100 pos ASCL1 neg	Tumor 1	Mid or Peripheral	TC	41	Male	RUL	1	0.0246407	Alive	1A
Negative	Negative	S100 ASCL1 both neg	Tumor 1	Central	TC	62	Female	Lingula	1.5	1.72211	Alive	1A
Negative	Positive	S100 Neg ASCL1 Pos	Tumor 1	Central	TC	69	Male	RML	2.4	0.0355921	Alive	1A
Negative	Negative	S100 ASCL1 both neg	Tumor 1	Central	TC	38	Female	RML	4	5.95483	Alive	1B
Negative	Positive	S100 Neg ASCL1 Pos	Tumor 1	Mid or Peripheral	TC	70	Female	LUL	2.1	0.0602327	Alive	1A
Negative	Negative	S100 ASCL1 both neg	Tumor 1	Central	TC	38	Female	RLL	3.4	1.16632	Alive	1B
Negative	Positive	S100 Neg ASCL1 Pos	Tumor 1	Mid or Peripheral	TC	60	Female	RUL	1.7	1.56879	Alive	1A
Positive	Negative	S100 pos ASCL1 neg	Tumor 1	Mid or Peripheral	TC	67	Female	RML	2	0.72553	Alive	1A
9	Positive	9	Tumor 1	Mid or Peripheral	TC	58	Female	RML	1	2.56263	Alive	X
Negative	Positive	S100 Neg ASCL1 Pos	Tumor 1	Mid or Peripheral	TC	67	Female	RUL	1.4	0.314853	Alive	1A
Negative	Positive	S100 Neg ASCL1 Pos	Tumor 1	Central	TC	37	Male	RUL	4	2.98426	Alive	1B
Negative	Positive	S100 Neg ASCL1 Pos	Tumor 1	Mid or Peripheral	TC	52	Female	RLL	2	4.96646	Alive	1A
Positive	Positive	S100 Pos ASCL1 pos	Tumor 1	Central	TC	72	Male	RML	0.8	3.07734	Alive	1A
Negative	Negative	S100 ASCL1 both neg	Tumor 1	Mid or Peripheral	TC	42	Female	LUL	2	0.0657084	Alive	1A
Negative	Negative	S100 ASCL1 both neg	Tumor 1	Central	TC	42	Female	LUL	1.5	1.32512	Alive	1A
Positive	Positive	S100 Pos ASCL1 pos	Tumor 1	Mid or Peripheral	TC	79	Female	LLL	0.8	4.32854	Alive	1A
9	Positive	9	Tumor 1	Mid or Peripheral	TC	41	Female	RML	0.9	1.03765	Alive	1A
Negative	Negative	S100 ASCL1 both neg	Tumor 1	Mid or Peripheral	TC	80	Female	LUL	2.2	5.18823	Alive	1A
Negative	Negative	S100 ASCL1 both neg	Tumor 1	Central	TC	45	Male	RLL	2	2.34086	Alive	1A
Negative	Positive	S100 Neg ASCL1 Pos	Tumor 1	Mid or Peripheral	TC	71	Female	RUL	2.5	3.79466	Alive	1A
9	Positive	9	Tumor 1	Mid or Peripheral	TC	62	Male	LUL	1.3	3.5373	Dead	1A
Negative	Negative	S100 ASCL1 both neg	Tumor 1	Central	TC	46	Female	LLL	0.9	3.64956	Alive	3B
Negative	Negative	S100 ASCL1 both neg	Tumor 1	Central	TC	33	Female	RUL	1.5	3.02533	Alive	1A
Negative	Positive	S100 Neg ASCL1 Pos	Tumor 1	Mid or Peripheral	TC	52	Female	RUL	1.2	4.9911	Alive	1A
9	Positive	9	Tumor 1	Mid or Peripheral	TC	46	Female	RLL	0.5	3.64956	Alive	3B
Negative	Positive	S100 Neg ASCL1 Pos	Tumor 1	Central	TC	76	Female	RML	1.7	3.65503	Alive	1A
Positive	Negative	S100 pos ASCL1 neg	Tumor 1	Central	TC	42	Female	LLL	2	0.208077	Alive	1A
Negative	Negative	S100 ASCL1 both neg	Tumor 1	Central	TC	37	Female		4.5	3.95072	Alive	1B
Negative	Positive	S100 Neg ASCL1 Pos	Tumor 1	Central	TC	67	Male	RLL	1.5	0.728268	Alive	1A
Negative	Positive	S100 Neg ASCL1 Pos	Tumor 1	Central	TC	70	Female	LUL	1.1	3.75633	Alive	1A
Negative	Negative	S100 ASCL1 both neg	Tumor 1	Central	TC	43	Female	RLL	1.7	4.43258	Alive	1A
Negative	Negative	S100 ASCL1 both neg	Tumor 1	Central	TC	44	Male	RML	4.5	3.76728	Alive	1B
Negative	Positive	S100 Neg ASCL1 Pos	Tumor 1	Mid or Peripheral	TC	54	Male	LUL	4	4.13963	Alive	1B
Negative	Negative	S100 ASCL1 both neg	Tumor 1	Mid or Peripheral	TC	48	Female	RLL	3.7	3.04997	Alive	1B
Negative	Negative	S100 ASCL1 both neg	Tumor 1	Central	TC	61	Female	RLL	3	0.054757	Alive	1A
Negative	Negative	S100 ASCL1 both neg	Tumor 1	Central	TC	43	Female		1.5	3.09651	Alive	1A
Negative	Negative	S100 ASCL1 both neg	Tumor 1	Central	TC	45	Female	LLL	3.3	2.41478	Alive	1B
Negative	Negative	S100 ASCL1 both neg	Tumor 1	Mid or Peripheral	TC	65	Female	LLL	4.5	3.08282	Alive	1B
Negative	Negative	S100 ASCL1 both neg	Tumor 1	Central	TC	49	Male	RML	4.5	2.81177	Alive	1B
Negative	Positive	S100 Neg ASCL1 Pos	Tumor 1	Central	TC	65	Female	RML	2.1	3.01164	Alive	1A
Negative	Positive	S100 Neg ASCL1 Pos	Tumor 1	Mid or Peripheral	TC	53	Female	RLL	2.2	2.40657	Alive	1B
Positive	Positive	S100 Pos ASCL1 pos	Tumor 1	Mid or Peripheral	TC	47	Female	RUL	1.2	2.78166	Alive	1A
Positive	Positive	S100 Pos ASCL1 pos	Tumor 1	Central	TC	70	Male	RUL	0.6	0.290212	Alive	1A
Positive	Positive	S100 Pos ASCL1 pos	Tumor 1	Central	TC	58	Female	RLL	1.6	2.6694	Alive	1A
Negative	Positive	S100 Neg ASCL1 Pos	Tumor 1	Central	TC	48	Female	RLL	3	0.0684463	Alive	1A
Positive	Positive	S100 Pos ASCL1 pos	Tumor 1	Mid or Peripheral	TC	68	Female	RLL	0.9	8.45448	Alive	1A
Negative	Positive	S100 Neg ASCL1 Pos	Tumor 1	Central	TC	69	Female	RLL	3	2.14921	Alive	3A
Negative	Positive	S100 Neg ASCL1 Pos	Tumor 1	Central	TC	62	Female	Lingula	1	1.7577	Alive	1A
Negative	Negative	S100 ASCL1 both neg	Tumor 1	Central	TC	32	Male	LUL	6	1.61259	Alive	1B
Negative	Negative	S100 ASCL1 both neg	Tumor 1	Mid or Peripheral	TC	76	Female	RUL	2.5	2.43943	Alive	1A
Negative	Positive	S100 Neg ASCL1 Pos	Tumor 1	Mid or Peripheral	TC	64	Male	LLL	1.7	2.36824	Alive	1A
Negative	Negative	S100 ASCL1 both neg	Tumor 1	Central	TC	28	Male	Right Lung NOS	1	2.04791	Alive	1A
Negative	Negative	S100 ASCL1 both neg	Tumor 1	Central	TC	45	Male	RLL	1.6	2.75154	Alive	1A
Negative	Negative	S100 ASCL1 both neg	Tumor 1	Central	TC	58	Male	RML	1.6	1.02943	Alive	2A
Negative	Negative	S100 ASCL1 both neg	Tumor 1	Mid or Peripheral	TC	68	Female	Right Lung NOS	2	1.36345	Alive	1A
Positive	Negative	S100 Neg ASCL1 Pos	Tumor 1	Central	TC	60	Female	LUL	1.2	1.23751	Alive	2A
Negative	Negative	S100 ASCL1 both neg	Tumor 1	Central	TC	31	Female	LUL	1.5	0.829569	Alive	1A
Negative	Negative	S100 ASCL1 both neg	Tumor 1	Central	TC	53	Female	RML	2.4	1.13347	Alive	1A
Positive	Positive	S100 Pos ASCL1 pos	Tumor 1	Mid or Peripheral	TC	55	Male	LUL	0.55	5.54962	Alive	1A
Negative	Negative	S100 ASCL1 both neg	Tumor 1	Central	TC	14	Male		1.6	1.82341	Alive	1A
Negative	Positive	S100 Neg ASCL1 Pos	Tumor 1	Mid or Peripheral	TC	50	Female	RLL	1.8	0.835044	Alive	1A
Negative	Positive	S100 Neg ASCL1 Pos	Tumor 1	Mid or Peripheral	TC	55	Female	RML	2.3	1.10883	Alive	1A
Negative	Negative	S100 ASCL1 both neg	Tumor 1	Central	TC	80	Male	RLL	2	0.295688	Alive	1A
Negative	Positive	S100 Neg ASCL1 Pos	Tumor 1	Mid or Peripheral	TC	56	Female	LUL	0.6	1.03765	Alive	1A
Negative	Negative	S100 ASCL1 both neg	Tumor 1	Mid or Peripheral	TC	47	Female	RLL	2.2	0.66256	Alive	1A
Positive	Negative	S100 pos ASCL1 neg	Tumor 1	Mid or Peripheral	TC	58	Female	RML	1.7	0.911704	Alive	1A
Negative	Negative	S100 ASCL1 both neg	Tumor 1	Mid or Peripheral	TC	58	Female	LUL	1.3	0.971937	Alive	1A
Negative	Negative	S100 ASCL1 both neg	Tumor 1	Central	TC	59	Female	LUL	3.6	0.950034	Alive	1B
Negative	Negative	S100 ASCL1 both neg	Tumor 1	Central	TC	50	Female	Left Lung NOS	2.7	0.320329	Alive	1A
Negative	Positive	S100 Neg ASCL1 Pos	Tumor 1	Mid or Peripheral	TC	50	Female	RLL	2	5.24846	Alive	1A
Negative	Negative	S100 ASCL1 both neg	Tumor 1	Central	TC	48	Female	RLL	1.3	1.43463	Alive	1B
Negative	Negative	S100 ASCL1 both neg	Tumor 1	Central	TC	66	Female	LUL	1.7	0.591376	Alive	1B
9	Positive	9	Tumor 1	Mid or Peripheral	TC	64	Female	LLL	1.3	0.793977	Alive	1A
Negative	Negative	S100 ASCL1 both neg	Tumor 1	Central	TC	47	Male	LLL	1.4	1.80424	Alive	1A
Negative	Negative	S100 ASCL1 both neg	Tumor 1	Central	TC	34	Male	RLL	1.8	0.410678	Alive	1A
Negative	Negative	S100 ASCL1 both neg	Tumor 1	Central	TC	35	Female	LUL	1	0.438056	Alive	1A
Negative	Negative	S100 ASCL1 both neg	Tumor 1	Mid or Peripheral	TC	59	Female	RLL	5	0.325804	Alive	3A
Negative	Positive	S100 Neg ASCL1 Pos	Tumor 1	Mid or Peripheral	TC	38	Male	LUL	1.2	0.386037	Alive	1A
Negative	Negative	S100 ASCL1 both neg	Tumor 1	Central	TC	43	Male	LLL	0.8	0.328542	Alive	1A
Negative	Positive	S100 Neg ASCL1 Pos	Tumor 1	Mid or Peripheral	TC	72	Female	LUL	1.6	0.273785	Alive	2A
Negative	Positive	S100 Neg ASCL1 Pos	Tumor 1	Mid or Peripheral	TC	73	Female	RML	2.5	8.71458	Dead	1B
Negative	Negative	S100 ASCL1 both neg	Tumor 1	Mid or Peripheral	TC	55	Male	LUL	1.7	8.17796	Alive	2A
Negative	Positive	S100 Neg ASCL1 Pos	Tumor 1	Mid or Peripheral	TC	77	Female	LLL	1.5	0.290212	Alive	1A
Positive	Negative	S100 pos ASCL1 neg	Tumor 1	Central	TC	50	Male	LUL	3	12.23	Dead	1B
Negative	Negative	S100 ASCL1 both neg	Tumor 1	Mid or Peripheral	TC	66	Female	RML	1.4	0.019165	Alive	1A
Negative	Positive	S100 Neg ASCL1 Pos	Tumor 1	Mid or Peripheral	TC	44	Female	RML	1.7	13.0732	Alive	1A
Negative	Negative	S100 ASCL1 both neg	Tumor 1	Central	TC	59	Female	RML	1.8	6.66667	Dead	1A
Positive	Negative	S100 pos ASCL1 neg	Tumor 1	Central	TC	55	Male	LUL	3.5	3.34018	Alive	2B
Negative	Negative	S100 ASCL1 both neg	Tumor 1	Mid or Peripheral	TC	61	Female	LLL	1.2	4.62423	Alive	1A
Negative	Positive	S100 Neg ASCL1 Pos	Tumor 1	Mid or Peripheral	TC	72	Female	LUL	2	8.28747	Dead	2A
Positive	Negative	S100 pos ASCL1 neg	Tumor 1	Mid or Peripheral	TC	60	Female	RLL	2	8.23272	Dead	1A
Negative	Positive	S100 Neg ASCL1 Pos	Tumor 1	Central	TC	69	Female	LUL	2	9.03491	Alive	1A
Negative	Negative	S100 ASCL1 both neg	Tumor 1	Central	TC	41	Male	RLL	3	12.731	Alive	1A
Negative	Negative	S100 ASCL1 both neg	Tumor 1	Central	TC	48	Female	RLL	1.1	0.0136893	Alive	1A
Negative	Positive	S100 Neg ASCL1 Pos	Tumor 1	Central	TC	36	Female	RLL	1.5	0.0985626	Alive	1A
Negative	Negative	S100 ASCL1 both neg	Tumor 1	Central	TC	41	Male	RML	4	12.0876	Alive	1B
Negative	Negative	S100 ASCL1 both neg	Tumor 1	Mid or Peripheral	TC	64	Male	RML	2	5.58522	Alive	1A
Positive	Positive	S100 Pos ASCL1 pos	Tumor 1	Mid or Peripheral	TC	47	Male	Lingula	1	11.4606	Alive	1A
Positive	Negative	S100 pos ASCL1 neg	Tumor 1	Central	TC	59	Male	LLL	4.5	0.0273785	Uknown	2B
Negative	Positive	S100 Neg ASCL1 Pos	Tumor 1	Central	TC	73	Female	Left Lung NOS	6	0.019165	Alive	1B
Negative	Positive	S100 Neg ASCL1 Pos	Tumor 1	Mid or Peripheral	TC	67	Female	RUL	1.1	0.0410678	Alive	1A
9	9	9	Tumor 1	Mid or Peripheral	TC	71	Female	RLL	1.2	3.86858	Alive	1A
Positive	Positive	S100 Pos ASCL1 pos	Tumor 1	Mid or Peripheral	TC	71	Male	LUL	1	1.00753	Dead	X
Positive	Negative	S100 pos ASCL1 neg	Tumor 1	Mid or Peripheral	TC	71	Male	LLL	2	0.33128	Alive	1A
Negative	Positive	S100 Neg ASCL1 Pos	Tumor 1	Mid or Peripheral	TC	68	Female	LLL	0.8	0.881588	Alive	1A
Positive	Negative	S100 pos ASCL1 neg	Tumor 1	Central	TC	69	Male	LLL	2.4	3.50719	Dead	2A
Negative	Positive	S100 Neg ASCL1 Pos	Tumor 1	Mid or Peripheral	TC	77	Female	RLL	1	1.47023	Alive	1A
Negative	Positive	S100 Neg ASCL1 Pos	Tumor 1	Mid or Peripheral	TC	69	Female	RUL	1.2	2.00958	Alive	1A
Negative	Negative	S100 ASCL1 both neg	Tumor 1	Central	TC	52	Female	RLL	2.7	0.0793977	Dead	1A
Positive	Positive	S100 Pos ASCL1 pos	Tumor 1	Mid or Peripheral	TC	70	Female	RLL	0.7	2.85832	Alive	1A
Negative	Positive	S100 Neg ASCL1 Pos	Tumor 1	Mid or Peripheral	TC	60	Male	RML	1.2	1.31143	Alive	1A
Positive	Positive	S100 Pos ASCL1 pos	Tumor 1	Mid or Peripheral	TC	67	Female	RLL	1.4	8.72005	Alive	1A
Negative	Positive	S100 Neg ASCL1 Pos	Tumor 1	Central	TC	63	Male	RLL	2	0.752909	Alive	1A
Positive	Positive	S100 Pos ASCL1 pos	Tumor 1	Central	TC	69	Female	RLL	3	2.00958	Alive	1A
Negative	Positive	S100 Neg ASCL1 Pos	Tumor 1	Mid or Peripheral	TC	66	Female	Lingula	1.5	1.87817	Alive	1A
Negative	Positive	S100 Neg ASCL1 Pos	Tumor 1	Mid or Peripheral	TC	64	Female	LUL	1	8.95003	Alive	1A
Negative	Positive	S100 Neg ASCL1 Pos	Tumor 1	Mid or Peripheral	TC	57	Female	LLL	1.1	2.81451	Alive	1A
Negative	Positive	S100 Neg ASCL1 Pos	Tumor 1	Mid or Peripheral	TC	79	Male	RLL	1.6	4.61602	Alive	1A
Positive	Negative	S100 pos ASCL1 neg	Tumor 1	Central	TC	76	Male	RLL	1.6	9.08693	Alive	1A
Negative	Negative	S100 ASCL1 both neg	Tumor 1	Central	TC	41	Female	LLL	3	7.03628	Alive	1A
Negative	Negative	S100 ASCL1 both neg	Tumor 1	Central	TC	33	Female	RML	5	4.76934	Alive	1B
Negative	Positive	S100 Neg ASCL1 Pos	Tumor 1	Mid or Peripheral	TC	80	Female	LUL	0.6	4.24367	Dead	1A
Negative	Negative	S100 ASCL1 both neg	Tumor 1	Central	TC	31	Male	RLL	7.8	8.35044	Alive	1B
Positive	Positive	S100 Pos ASCL1 pos	Tumor 1	Mid or Peripheral	TC	72	Male	RLL	3	5.20465	Dead	2B
Negative	Negative	S100 ASCL1 both neg	Tumor 1	Mid or Peripheral	TC	46	Male	LUL	2	5.13895	Alive	1A
Negative	Negative	S100 ASCL1 both neg	Tumor 1	Central	TC	33	Female	Right Lung NOS	4	6.03422	Alive	1B
Negative	Negative	S100 ASCL1 both neg	Tumor 1	Central	TC	58	Female		1.7	8.05202	Alive	1B
Negative	Negative	S100 ASCL1 both neg	Tumor 1	Mid or Peripheral	TC	76	Female	RLL	0.6	4.6078	Dead	1B
Negative	Positive	S100 Neg ASCL1 Pos	Tumor 1	Mid or Peripheral	TC	66	Female	RML	1.8	2.76797	Dead	1A
Positive	Positive	S100 Pos ASCL1 pos	Tumor 1	Central	TC	44	Male	RUL	2	0.468172	Alive	1A
9	Positive	9	Tumor 1	Central	TC	57	Female	RUL	1	6.13826	Alive	1A
Positive	Negative	S100 pos ASCL1 neg	Tumor 1	Central	TC	77	Male	LLL	3.5	7.74812	Dead	1B
Negative	Negative	S100 ASCL1 both neg	Tumor 1	Central	TC	43	Male	RLL	4.4	4.56126	Alive	1B
Positive	Positive	S100 Pos ASCL1 pos	Tumor 1	Mid or Peripheral	TC	45	Male	RUL	0.8	2.7488	Alive	1A
Negative	Negative	S100 ASCL1 both neg	Tumor 1	Central	TC	57	Female	LUL	2.7	1.32512	Alive	1A
Negative	Positive	S100 Neg ASCL1 Pos	Tumor 1	Mid or Peripheral	TC	50	Female	RLL	1.1	7.43326	Alive	1A
Negative	Positive	S100 Neg ASCL1 Pos	Tumor 1	Mid or Peripheral	TC	72	Female	Lingula	1.2	7.15127	Alive	1A
Negative	Positive	S100 Neg ASCL1 Pos	Tumor 1	Central	TC	71	Female	RML	1.5	6.98152	Alive	1A
Negative	Positive	S100 Neg ASCL1 Pos	Tumor 1	Mid or Peripheral	TC	80	Female	RLL	1.2	3.02533	Alive	1A
Negative	Negative	S100 ASCL1 both neg	Tumor 1	Central	TC	46	Female	LLL	1.9	1.4976	Alive	2A
Negative	Positive	S100 Neg ASCL1 Pos	Tumor 1	Mid or Peripheral	TC	64	Male	LUL	1.6	3.00616	Alive	1A
Positive	Positive	S100 Pos ASCL1 pos	Tumor 1	Mid or Peripheral	TC	29	Male	LLL	1.1	6.86379	Alive	1A
Positive	Positive	S100 Pos ASCL1 pos	Tumor 1	Mid or Peripheral	TC	47	Male	RLL	1.5	6.32717	Alive	3A
Positive	Positive	S100 Pos ASCL1 pos	Tumor 1	Mid or Peripheral	TC	56	Female	LUL	0.6	3.93977	Alive	1A
Negative	Negative	S100 ASCL1 both neg	Tumor 1	Central	TC	23	Male	Right Lung NOS	7	5.34976	Alive	1B
Negative	Negative	S100 ASCL1 both neg	Tumor 1	Mid or Peripheral	TC	63	Male	RLL	0.8	0.0602327	Alive	1A
Positive	Positive	S100 Pos ASCL1 pos	Tumor 1	Central	TC	78	Female	LUL	2.5	0.117728	Alive	1A
Positive	Positive	S100 Pos ASCL1 pos	Tumor 1	Mid or Peripheral	TC	72	Male	RML	1	0.054757	Alive	1A
Negative	Positive	S100 Neg ASCL1 Pos	Tumor 1	Mid or Peripheral	AC	54	Male	RUL	2.5	3.2115	Dead	3A
Positive	Positive	S100 Pos ASCL1 pos	Tumor 1	Mid or Peripheral	AC	71	Male	LLL	7	3.46886	Dead	3A
Negative	Positive	S100 Neg ASCL1 Pos	Tumor 1	Central	AC	73	Female	Lingula	5.5	0.0410678	Alive	1B
Negative	Positive	S100 Neg ASCL1 Pos	Tumor 1	Central	AC	46	Female	Right Lung NOS	4.5	4.87885	Alive	3A
Positive	Negative	S100 pos ASCL1 neg	Tumor 1	Mid or Peripheral	AC	64	Female	LUL	6.5	0.339493	Alive	1B
Negative	Negative	S100 ASCL1 both neg	Tumor 1	Central	AC	22	Male	RUL	2.2	4.06571	Alive	1A
Positive	Negative	S100 pos ASCL1 neg	Tumor 1	Mid or Peripheral	AC	60	Male	RLL	1.2	0.451745	Alive	1A
Negative	Negative	S100 ASCL1 both neg	Tumor 1	Mid or Peripheral	AC	61	Male	RLL	2	0.246407	Alive	1A
Negative	Negative	S100 ASCL1 both neg	Tumor 1	Central	AC	62	Male	RML	3.4	12.8159	Alive	1B
Negative	Negative	S100 ASCL1 both neg	Tumor 1	Central	AC	61	Male	LLL	4	10.6229	Alive	1B
Positive	Positive	S100 Pos ASCL1 pos	Tumor 1	Mid or Peripheral	AC	65	Female	RLL	2.1	5.16906	Dead	1A
Positive	Positive	S100 Pos ASCL1 pos	Tumor 1	Mid or Peripheral	AC	63	Female	LLL	3.5	7.20055	Dead	3A
Positive	Positive	S100 Pos ASCL1 pos	Tumor 1	Mid or Peripheral	AC	54	Female	RLL	2.5	0.054757	Alive	1A
Negative	Negative	S100 ASCL1 both neg	Tumor 1	Central	AC	68	Female	RLL	1	7.70157	Dead	1A
9	9	9	Tumor 1	Mid or Peripheral	AC	73	Female	LUL	0.7	6.68857	Dead	1A
Negative	Negative	S100 ASCL1 both neg	Tumor 1	Central	AC	43	Female	Left Lung NOS	1.4	3.86585	Alive	1A
Positive	Negative	S100 pos ASCL1 neg	Tumor 1	Central	AC	73	Female	LUL	2.4	0.0958248	Alive	2A
Negative	Positive	S100 Neg ASCL1 Pos	Tumor 1	Mid or Peripheral	AC	46	Female	LLL	1	0.492813	Dead	3A
165	171	165	173	173	173	173	173	169	173	173	171	173

## Sheet: crosstabulations
S100 ASCL1 Combo * CentPerpOnly Crosstabulation
			CentPerpOnly		Total
			Central	Mid or Peripheral
S100 ASCL1 Combo	S100 ASCL1 both neg	Count	52	19	71
		% within S100 ASCL1 Combo	0.732	0.268	1
		% within CentPerpOnly	0.619	0.235	0.43
		% of Total	0.315	0.115	0.43
	S100 pos ASCL1 neg	Count	8	7	15
		% within S100 ASCL1 Combo	0.533	0.467	1
		% within CentPerpOnly	0.095	0.086	0.091
		% of Total	0.048	0.042	0.091
	S100 Neg ASCL1 Pos	Count	17	37	54
		% within S100 ASCL1 Combo	0.315	0.685	1
		% within CentPerpOnly	0.202	0.457	0.327
		% of Total	0.103	0.224	0.327
	S100 Pos ASCL1 pos	Count	7	18	25
		% within S100 ASCL1 Combo	0.28	0.72	1
		% within CentPerpOnly	0.083	0.222	0.152
		% of Total	0.042	0.109	0.152
Total		Count	84	81	165
		% within S100 ASCL1 Combo	0.509	0.491	1
		% within CentPerpOnly	1	1	1
		% of Total	0.509	0.491	1
CentPerpOnly * ASCL1 Crosstabulation
			ASCL1		Total
			Negative	Positive
CentPerpOnly	Central	Count	61	24	85
		% within CentPerpOnly	0.718	0.282	1
		% within ASCL1	0.701	0.286	0.497
		% of Total	0.357	0.14	0.497
	Mid or Peripheral	Count	26	60	86
		% within CentPerpOnly	0.302	0.698	1
		% within ASCL1	0.299	0.714	0.503
		% of Total	0.152	0.351	0.503
Total		Count	87	84	171
		% within CentPerpOnly	0.509	0.491	1
		% within ASCL1	1	1	1
		% of Total	0.509	0.491	1
CentPerpOnly * S-100 Crosstabulation
			S-100		Total
			Negative	Positive
CentPerpOnly	Central	Count	68	16	84
		% within CentPerpOnly	0.81	0.19	1
		% within S-100	0.548	0.39	0.509
		% of Total	0.412	0.097	0.509
	Mid or Peripheral	Count	56	25	81
		% within CentPerpOnly	0.691	0.309	1
		% within S-100	0.452	0.61	0.491
		% of Total	0.339	0.152	0.491
Total		Count	124	41	165
		% within CentPerpOnly	0.752	0.248	1
		% within S-100	1	1	1
		% of Total	0.752	0.248	1
			Sex		Total
			Male	Female
S100 ASCL1 Combo	S100 ASCL1 both neg	Count	28	43	71
		% within S100 ASCL1 Combo	0.394	0.606	1
		% within Sex	0.467	0.41	0.43
		% of Total	0.17	0.261	0.43
	S100 pos ASCL1 neg	Count	9	6	15
		% within S100 ASCL1 Combo	0.6	0.4	1
		% within Sex	0.15	0.057	0.091
		% of Total	0.055	0.036	0.091
	S100 Neg ASCL1 Pos	Count	11	43	54
		% within S100 ASCL1 Combo	0.204	0.796	1
		% within Sex	0.183	0.41	0.327
		% of Total	0.067	0.261	0.327
	S100 Pos ASCL1 pos	Count	12	13	25
		% within S100 ASCL1 Combo	0.48	0.52	1
		% within Sex	0.2	0.124	0.152
		% of Total	0.073	0.079	0.152
Total		Count	60	105	165
		% within S100 ASCL1 Combo	0.364	0.636	1
		% within Sex	1	1	1
		% of Total	0.364	0.636	1

## Sheet: Female to male
Supplementary information for Gender for all dataset
Fernandez-Cuesta dataset		Female	Male	total	Bionomial Pval			TMA data	Our disovery data	Fernandez-Cuesta data
	LC1	18	9	27	NS		LC1	Fold = 3.91 and Pval = 1.40E-05	Fold = 6.5 and Pval = 0.007	Fold = 2 and NS
	LC2	3	7	10	NS		LC2	Fold = 0.67 and Pval = NS	Fold = 0.34 and Pval = NS	Fold = 0.42 and Pval = NS
	LC3	14	10	24	NS		LC3	Fold = 1.54 and Pval = NS	Fold = 6 and Pval = NS	Fold = 1.4 and Pval = NS
TMA dataset		Female	Male	total	Bionomial Pval
	LC1	43	11	54	1.401e-05			NS = not significant (Pval > 0.05)
	LC2	6	9	15	NS			Fold = female to male ratio
	LC3	43	28	71	NS
Our disovery dataset		Female	Male	total	Bionomial Pval
	LC1	13	2	15	0.007
	LC2	2	6	8	NS
	LC3	6	1	7	NS
