# Supplementary material for: Integrative Genomic Characterization Identifies Molecular Subtypes of Lung Carcinoids
Source: Oxford University Press journal article supplement (doi:10.1158/0008-5472.can-19-0214), 2019-07-12
Supplement: 00085472can190214-sup-215659_2_supp_5607915_ptf540.xlsx [file 00085472can190214-sup-215659_2_supp_5607915_ptf540.xlsx]

## Sheet: DEgenes
Supplementary File 7: Differentially expressed genes between ACs and TCs from LC1 (FC>=2 and Padj <=0.05)
Subtype LC1
ACs vs TCs
Gene	baseMean	log2FoldChange	lfcSE	stat	pvalue	padj
LRRN4	76.5781	2.3099	0.43707	5.28496	1.25731e-07	0.000783516
HOXB4	1348.28	2.29147	0.473356	4.8409	1.29251e-06	0.00219668
GPM6A	140.106	2.20873	0.45373	4.86794	1.12765e-06	0.00219668
P2RX5	140.202	2.20553	0.488563	4.51432	6.35199e-06	0.00456733
PLD5	586.001	2.13961	0.490626	4.36098	1.29484e-05	0.00573144
HJURP	216.914	2.09885	0.44163	4.7525	2.00919e-06	0.00268299
FAM64A	220.931	2.07071	0.448187	4.62018	3.83398e-06	0.00358382
DEPDC1	199.86	2.0621	0.455431	4.5278	5.96023e-06	0.00453018
CCNB2	258.25	2.05385	0.430964	4.76571	1.8819e-06	0.00268299
C5orf38	594.936	2.04787	0.345046	5.93506	2.93746e-09	5.49159e-05
NEIL3	40.6738	2.00719	0.466222	4.30522	1.66818e-05	0.00671891
GTSE1	240.727	2.00664	0.410841	4.88422	1.03837e-06	0.00219668
CDC25C	62.2317	1.99892	0.423014	4.72543	2.29628e-06	0.00286193
ASPM	501.954	1.98973	0.447274	4.44858	8.644e-06	0.005032
KCNF1	411.673	1.9793	0.490449	4.03569	5.44423e-05	0.0127074
KIF14	333.259	1.9779	0.467211	4.23342	2.30167e-05	0.00827473
CDC20	332.31	1.95406	0.419983	4.65272	3.27591e-06	0.00322332
KIF18B	118.89	1.92449	0.456956	4.21154	2.53637e-05	0.00831884
TAC3	55.7596	1.92148	0.489137	3.92831	8.55445e-05	0.0158329
IFI6	10059.5	1.91452	0.455276	4.20518	2.60875e-05	0.00840871
FBN2	263.499	1.90057	0.474448	4.00585	6.17946e-05	0.0140884
C6orf223	340.558	1.89161	0.491018	3.85242	0.000116956	0.0188384
TROAP	278.614	1.88914	0.423701	4.45865	8.24769e-06	0.005032
UBE2C	292.879	1.88319	0.432216	4.35705	1.31828e-05	0.00573144
SAPCD2	484.961	1.87578	0.381819	4.91275	8.98076e-07	0.00219668
HLA-G	48.3338	1.87247	0.48879	3.83084	0.000127707	0.0200629
AURKB	109.046	1.87196	0.429355	4.35994	1.30098e-05	0.00573144
RRM2	447.072	1.85318	0.417194	4.442	8.9126e-06	0.005032
KIF20A	233.439	1.84393	0.395115	4.66681	3.0591e-06	0.00317721
DLX6	121.17	1.84336	0.481956	3.82474	0.000130911	0.0203948
ATP6V1B1	550.82	1.84139	0.451106	4.08195	4.46589e-05	0.011437
EXO1	157.518	1.83089	0.460607	3.97494	7.03967e-05	0.0151272
HOXB7	521.208	1.82506	0.488559	3.73561	0.000187264	0.0246542
CXCL11	57.442	1.82473	0.486982	3.74701	0.000178955	0.0244654
NEK2	175.089	1.81938	0.433619	4.1958	2.71915e-05	0.00847242
NTNG1	69.6603	1.81311	0.491445	3.68935	0.000224824	0.0274712
CDCA8	500.599	1.81292	0.406324	4.46176	8.12885e-06	0.005032
PLEKHG4B	2138.41	1.81186	0.463689	3.90748	9.32633e-05	0.0166053
LOC400043	352.819	1.80132	0.454061	3.96714	7.27409e-05	0.0154533
DLGAP5	149.853	1.79036	0.442474	4.04625	5.20443e-05	0.012601
IQGAP3	513.516	1.78704	0.436652	4.09259	4.26585e-05	0.0112324
CXCL10	330.928	1.78494	0.491664	3.6304	0.00028298	0.0306995
CENPA	97.3765	1.77779	0.432886	4.10682	4.01135e-05	0.0108684
MYBL2	156.352	1.77034	0.422592	4.18925	2.79874e-05	0.0084996
SPNS2	2192.11	1.76805	0.457311	3.86618	0.000110553	0.0184062
LOC728716	10.1386	1.76402	0.491753	3.5872	0.000334243	0.0336253
AJAP1	63.431	1.74008	0.464259	3.74807	0.000178203	0.0244654
CENPF	1451.25	1.73601	0.450647	3.85226	0.000117035	0.0188384
HAPLN2	273.031	1.73082	0.475999	3.63618	0.000276713	0.0306995
LOC100652791	11.1131	1.72579	0.491734	3.50961	0.000448766	0.0392041
BIRC5	295.449	1.71272	0.419364	4.08409	4.42505e-05	0.011437
FZD2	1432.92	1.7119	0.441474	3.87769	0.000105451	0.0179218
OTOP3	674.451	1.70826	0.433126	3.94402	8.01273e-05	0.0157869
C15orf42	67.5065	1.70369	0.409859	4.15677	3.22785e-05	0.00914313
PBK	278.01	1.70281	0.422214	4.03305	5.50575e-05	0.0127074
LHX2	9.946	1.70085	0.491111	3.46327	0.000533646	0.0434706
CD6	171.666	1.69758	0.404205	4.19979	2.67159e-05	0.00846531
KIFC1	370.001	1.69621	0.378569	4.48058	7.4439e-06	0.00497013
BAI2	1132.82	1.6959	0.42443	3.9957	6.45021e-05	0.0143556
ASTL	7.44318	1.6921	0.451643	3.74655	0.000179286	0.0244654
ISG15	1301.12	1.69105	0.428917	3.94259	8.06049e-05	0.0157869
NUF2	240.394	1.68985	0.428442	3.94417	8.00767e-05	0.0157869
ANLN	387.276	1.6881	0.400406	4.21598	2.48694e-05	0.00830237
LOC154822	10.8118	1.68766	0.458035	3.68458	0.000229083	0.0276304
TOP2A	1575.7	1.67773	0.432391	3.88012	0.000104403	0.0179066
HCP5	1527.54	1.67355	0.478795	3.49534	0.000473454	0.0402328
SCML4	118.139	1.66796	0.37598	4.43631	9.15153e-06	0.005032
VSIG1	23.7052	1.6676	0.476025	3.50318	0.000459737	0.0395577
CLCNKB	146.193	1.65048	0.417026	3.95772	7.5667e-05	0.015545
HCG26	228.347	1.64711	0.4826	3.41298	0.000642556	0.0470266
KIAA1045	261.069	1.64274	0.475139	3.45738	0.00054545	0.0435609
ACOXL	139.554	1.64216	0.452675	3.62767	0.000285989	0.0306995
HMMR	224.682	1.64093	0.388066	4.22847	2.35281e-05	0.00827473
KIF23	278.025	1.6338	0.386743	4.2245	2.39473e-05	0.00827473
BUB1	392.891	1.63177	0.446277	3.6564	0.000255784	0.0296728
RTKN2	241.18	1.63003	0.376675	4.32741	1.50873e-05	0.00626793
C4orf19	70.2325	1.62956	0.45561	3.57666	0.000348011	0.0337186
KIF2C	293.891	1.62551	0.390927	4.15809	3.20919e-05	0.00914313
CASC5	177.683	1.62258	0.414978	3.91004	9.22793e-05	0.0165881
TPX2	657.983	1.62038	0.428082	3.7852	0.000153583	0.0224315
CEP55	104.288	1.60776	0.417662	3.84943	0.000118391	0.0188384
LOC440910	7.37925	1.60707	0.474999	3.38332	0.000716151	0.0499569
APOBEC3B	138.73	1.60583	0.364485	4.40576	1.05411e-05	0.00547407
PRG4	113.761	1.59433	0.460952	3.45877	0.00054265	0.0435609
MKI67	1135.17	1.58889	0.403903	3.93384	8.36001e-05	0.0157869
MEGF11	349.15	1.58189	0.431696	3.66436	0.000247957	0.0291544
NETO2	2323.68	1.58082	0.442676	3.57106	0.000355538	0.03374
BNIPL	88.2367	1.57904	0.416555	3.7907	0.000150221	0.0221853
PTTG1	301.262	1.57176	0.4157	3.781	0.000156197	0.0225333
E2F2	159.794	1.56719	0.428775	3.65505	0.000257127	0.0296728
OPN3	853.96	1.56308	0.453494	3.44675	0.000567382	0.0445681
GSG2	74.0774	1.56142	0.436898	3.57387	0.000351745	0.0337186
LOC100288637	276.87	1.55713	0.441798	3.52454	0.000424219	0.0381287
KIF18A	167.135	1.53912	0.413851	3.71901	0.000200004	0.0254564
TNFRSF13C	38.6542	1.53022	0.436955	3.50201	0.000461762	0.0395577
BATF2	184.022	1.52875	0.423847	3.60684	0.000309945	0.0322276
NCAPH	181.314	1.51889	0.406549	3.73607	0.000186921	0.0246542
DMRTA2	16.38	1.51333	0.424349	3.56624	0.000362141	0.0340212
CDCA2	92.921	1.50424	0.437954	3.4347	0.0005932	0.0452648
TACC3	815.274	1.50213	0.365726	4.10727	4.00368e-05	0.0108684
LOC100507050	357.546	1.48347	0.305484	4.85611	1.19714e-06	0.00219668
TK1	297.625	1.4819	0.396156	3.74069	0.000183515	0.0246542
PLK1	373.756	1.48088	0.355608	4.16435	3.12236e-05	0.00912071
GRB14	75.2554	1.46568	0.411408	3.5626	0.000367195	0.0342103
NDC80	163.73	1.4494	0.415034	3.49223	0.000479002	0.0403099
ARHGAP11B	32.6813	1.43121	0.419546	3.41133	0.000646474	0.0470266
CABP7	21988.1	1.40176	0.412905	3.39487	0.00068662	0.0489937
BUB1B	368.814	1.39881	0.389969	3.58697	0.000334544	0.0336253
GOLGA8E	85.556	1.39196	0.364812	3.81556	0.000135874	0.020821
FOXM1	659.587	1.38136	0.378674	3.6479	0.000264397	0.0301396
OIP5	64.9267	1.3521	0.395347	3.42004	0.000626125	0.0464495
ESPL1	1162.56	1.31537	0.300121	4.38278	1.17174e-05	0.00554422
FJX1	524.926	1.30578	0.378228	3.45237	0.000555683	0.0438333
MAP6D1	363.66	1.30541	0.263046	4.96267	6.95304e-07	0.00219668
WDR62	298.144	1.23441	0.341017	3.61979	0.000294847	0.0311422
AURKA	376.889	1.2277	0.360422	3.40628	0.000658547	0.0477192
CDCA3	118.281	1.22469	0.336543	3.63903	0.000273662	0.0306995
GPT2	2975.15	1.18014	0.243038	4.85578	1.19913e-06	0.00219668
NME4	3728.51	1.13663	0.292316	3.88838	0.000100915	0.0177982
SPAG5	858.325	1.09796	0.32276	3.40179	0.000669469	0.0483233
KCNH7	647.851	-1.06406	0.291105	-3.65525	0.000256936	0.0296728
ZBTB20	154.382	-1.08018	0.237768	-4.54302	5.54542e-06	0.00450746
KCNB2	906.915	-1.08206	0.28651	-3.77671	0.000158914	0.0225499
LOC653653	51.0519	-1.0872	0.305728	-3.55608	0.000376425	0.0346663
MAML2	1438.08	-1.0968	0.320642	-3.42064	0.000624735	0.0464495
SUMO4	14.5355	-1.15305	0.309159	-3.72964	0.000191751	0.0247617
NPY6R	51.4499	-1.15445	0.340268	-3.39275	0.000691937	0.0491854
AP1S2	1711.13	-1.16555	0.256551	-4.54313	5.5426e-06	0.00450746
PEG3	3492.72	-1.1734	0.313372	-3.74443	0.000180806	0.024494
ATP8A2	15670.1	-1.17521	0.340017	-3.45634	0.00054757	0.0435609
KATNAL1	2565.68	-1.17606	0.276404	-4.25487	2.09168e-05	0.00798039
ZIM2	74.6545	-1.27557	0.37612	-3.3914	0.000695357	0.0492413
MAOB	4945.58	-1.30996	0.372926	-3.51265	0.000443653	0.0389394
CCDC67	2841.37	-1.35613	0.389552	-3.48126	0.000499054	0.0412533
BARD1	563.826	-1.41385	0.365787	-3.86523	0.000110983	0.0184062
CAMK2A	99.0545	-1.45951	0.397652	-3.67032	0.000242244	0.028663
HMCN1	4788.12	-1.55036	0.426447	-3.63554	0.0002774	0.0306995
CXorf57	3193.48	-1.55172	0.441603	-3.51384	0.000441682	0.0389394
NLGN4Y	139.037	-1.68277	0.470724	-3.57487	0.000350408	0.0337186
MIMT1	13.3443	-1.69813	0.467339	-3.63362	0.000279473	0.0306995
LOC100507194	38.0118	-1.69837	0.489722	-3.46803	0.00052429	0.0429895
MKRN3	68.2233	-1.72766	0.491011	-3.51859	0.000433851	0.038623
GPR12	577.245	-1.75085	0.489702	-3.57535	0.000349763	0.0337186
GRIN3A	1202.69	-1.75193	0.482576	-3.63037	0.000283021	0.0306995
ASB9	420.19	-1.93711	0.489419	-3.95799	7.55847e-05	0.015545
PLA2G4A	713.014	-1.97519	0.486618	-4.05902	4.92797e-05	0.0121222
NPAS4	1643.63	-1.98836	0.491744	-4.04349	5.26604e-05	0.012601
GRM5	756.167	-2.02745	0.460913	-4.39878	1.08862e-05	0.00550047

## Sheet: Gene Ontologies
Gene ontologies analysis of differentially expressed genes between ACs and TCs
GO term for DEgenes
	Term	Genes	PValue	Bonferroni	FDR
	GO:0007067~mitosis	KIF23, KIFC1, NEK2, ANLN, AURKA, CEP55, AURKB, PTTG1, KIF2C, CDCA8, NCAPH, OIP5, BUB1, CDCA2, ASPM, CDCA3, DLGAP5, TPX2, KIF18A, NUF2, CENPF, CDC20, BIRC5, NDC80, ESPL1, PBK, UBE2C, CDC25C, CCNB2, SPAG5, PLK1, BUB1B	2.04004e-30	1.75851e-27	3.16217e-27
	GO:0000280~nuclear division	KIF23, KIFC1, NEK2, ANLN, AURKA, CEP55, AURKB, PTTG1, KIF2C, CDCA8, NCAPH, OIP5, BUB1, CDCA2, ASPM, CDCA3, DLGAP5, TPX2, KIF18A, NUF2, CENPF, CDC20, BIRC5, NDC80, ESPL1, PBK, UBE2C, CDC25C, CCNB2, SPAG5, PLK1, BUB1B	2.04004e-30	1.75851e-27	3.16217e-27
	GO:0000087~M phase of mitotic cell cycle	KIF23, KIFC1, NEK2, ANLN, AURKA, CEP55, AURKB, PTTG1, KIF2C, CDCA8, NCAPH, OIP5, BUB1, CDCA2, ASPM, CDCA3, DLGAP5, TPX2, KIF18A, NUF2, CENPF, CDC20, BIRC5, NDC80, ESPL1, PBK, UBE2C, CDC25C, CCNB2, SPAG5, PLK1, BUB1B	3.63143e-30	3.1303e-27	5.62892e-27
	GO:0048285~organelle fission	KIF23, KIFC1, NEK2, ANLN, AURKA, CEP55, AURKB, PTTG1, KIF2C, CDCA8, NCAPH, OIP5, BUB1, CDCA2, ASPM, CDCA3, DLGAP5, TPX2, KIF18A, NUF2, CENPF, CDC20, BIRC5, NDC80, ESPL1, PBK, UBE2C, CDC25C, CCNB2, SPAG5, PLK1, BUB1B	7.34803e-30	6.334e-27	1.13898e-26
	GO:0000279~M phase	KIF23, KIFC1, NEK2, ANLN, AURKA, CEP55, AURKB, PTTG1, KIF2C, CDCA8, NCAPH, OIP5, BUB1, CDCA2, ASPM, CDCA3, EXO1, MKI67, DLGAP5, TPX2, KIF18A, NUF2, CENPF, CDC20, BIRC5, NDC80, ESPL1, PBK, CDC25C, UBE2C, TACC3, CCNB2, SPAG5, PLK1, BUB1B	8.84035e-29	7.62038e-26	1.3703e-25
	GO:0022403~cell cycle phase	KIF23, KIFC1, NEK2, ANLN, AURKA, PTTG1, CEP55, AURKB, GTSE1, KIF2C, CDCA8, NCAPH, OIP5, BUB1, CDCA2, CAMK2A, ASPM, CDCA3, EXO1, MKI67, DLGAP5, TPX2, NUF2, KIF18A, CENPF, CDC20, BIRC5, NDC80, ESPL1, PBK, CDC25C, UBE2C, TACC3, CCNB2, SPAG5, PLK1, BUB1B	7.28683e-28	6.28125e-25	1.1295e-24
	GO:0000278~mitotic cell cycle	KIF23, KIFC1, NEK2, ANLN, AURKA, PTTG1, CEP55, AURKB, GTSE1, KIF2C, CDCA8, NCAPH, CENPA, OIP5, BUB1, CDCA2, CAMK2A, ASPM, CDCA3, DLGAP5, TPX2, KIF18A, NUF2, CENPF, CDC20, BIRC5, NDC80, ESPL1, PBK, CDC25C, UBE2C, CCNB2, SPAG5, PLK1, BUB1B	4.6428e-27	4.00209e-24	7.19659e-24
	GO:0022402~cell cycle process	KIF23, KIFC1, NEK2, ANLN, AURKA, PTTG1, CEP55, AURKB, GTSE1, KIF2C, NCAPH, CDCA8, CENPA, OIP5, BUB1, CDCA2, CAMK2A, ASPM, CDCA3, EXO1, MKI67, DLGAP5, TPX2, NUF2, KIF18A, CENPF, CDC20, BIRC5, NDC80, ESPL1, PBK, CDC25C, UBE2C, TACC3, CCNB2, SPAG5, PLK1, BUB1B, BARD1	2.18845e-25	1.88644e-22	3.39221e-22
	GO:0007049~cell cycle	KIF23, E2F2, KIFC1, NEK2, FOXM1, ANLN, AURKA, PTTG1, CEP55, AURKB, GTSE1, KIF2C, NCAPH, CDCA8, HJURP, CENPA, OIP5, BUB1, CDCA2, CAMK2A, ASPM, CDCA3, EXO1, MKI67, DLGAP5, TPX2, NUF2, KIF18A, CENPF, CDC20, BIRC5, NDC80, ESPL1, PBK, CDC25C, UBE2C, TACC3, GSG2, CCNB2, SPAG5, PLK1, BUB1B, BARD1	1.64709e-24	1.4198e-21	2.55308e-21
	GO:0051301~cell division	KIF23, KIFC1, NEK2, NUF2, CENPF, ANLN, CDC20, NDC80, BIRC5, ESPL1, PTTG1, AURKB, CEP55, CDC25C, UBE2C, HOXB4, NCAPH, CDCA8, CCNB2, OIP5, PLK1, SPAG5, BUB1, CDCA2, BUB1B, ASPM, CDCA3	3.55655e-20	3.06575e-17	5.51284e-17
	GO:0007059~chromosome segregation	KIFC1, NCAPH, NEK2, HJURP, DLGAP5, KIF18A, NUF2, CENPF, ESPL1, BIRC5, NDC80, PTTG1, TOP2A	1.79433e-12	1.54672e-09	2.78133e-09
	GO:0007017~microtubule-based process	KIF14, KIF23, KIFC1, NEK2, KIF18A, KIF18B, ESPL1, AURKA, NDC80, TACC3, UBE2C, GTSE1, KIF2C, SPAG5, CENPA, BUB1B, KIF20A	1.76523e-10	1.52163e-07	2.7362e-07
	GO:0000226~microtubule cytoskeleton organization	KIF23, KIF2C, NEK2, SPAG5, CENPA, KIF18A, BUB1B, NDC80, ESPL1, AURKA, UBE2C, TACC3	2.64135e-08	2.27682e-05	4.09423e-05
	GO:0007051~spindle organization	KIF23, SPAG5, BUB1B, NDC80, ESPL1, AURKA, UBE2C, TACC3	6.40159e-08	5.51802e-05	9.9228e-05
	GO:0010564~regulation of cell cycle process	NEK2, DLGAP5, BUB1, CENPF, BIRC5, ANLN, ESPL1, CDC25C, UBE2C, GTSE1	3.28647e-07	0.000283254	0.000509419
	GO:0000070~mitotic sister chromatid segregation	KIFC1, NCAPH, NEK2, DLGAP5, KIF18A, NDC80, ESPL1	3.81182e-07	0.000328525	0.000590851
	GO:0007346~regulation of mitotic cell cycle	NEK2, DLGAP5, BUB1, BUB1B, CENPF, BIRC5, ANLN, ESPL1, CDC25C, UBE2C, GTSE1	3.92419e-07	0.000338208	0.000608269
	GO:0000819~sister chromatid segregation	KIFC1, NCAPH, NEK2, DLGAP5, KIF18A, NDC80, ESPL1	4.51996e-07	0.000389544	0.000700615
	GO:0051640~organelle localization	CENPA, DLGAP5, KIF18A, CENPF, BIRC5, NDC80, ESPL1, TACC3, ASPM	7.28184e-07	0.000627498	0.00112872
	GO:0051726~regulation of cell cycle	E2F2, NEK2, DLGAP5, BUB1, BUB1B, CENPF, ESPL1, BIRC5, ANLN, CDC25C, UBE2C, TACC3, GTSE1	1.41016e-05	0.0120821	0.0218561
	GO:0051656~establishment of organelle localization	CENPA, DLGAP5, KIF18A, CENPF, BIRC5, NDC80, ESPL1	1.8914e-05	0.0161718	0.0293136

## Sheet: Expression
log2TPM expression of all DEgenes
Gene	Lu.Aty3	Lu.Aty4	Lu.Aty6	Lu.Aty7	Lu.Aty8	Lu.Aty12	Lu.Aty13	Lu.Aty1	Lu.ty3	Lu.ty5	Lu.ty7	Lu.ty8	Lu.ty10	Lu.ty14	Lu.ty15
GRM5	0.83996	0.613532	0.823749	1.10434	1.25096	0.687061	0.189034	1.45943	4.37782	4.49313	1.69153	0.903038	2.43296	1.69153	0.815575
NPAS4	2.8953	0.526069	1.73552	0.613532	0.765535	0.695994	0.333424	2.86987	6.9479	0.613532	2.40054	6.22342	0.941106	6.2211	2.54844
PLA2G4A	2.14731	0.678072	1.7866	1.89918	0.678072	0.475085	1.48027	1.14405	1.59932	1.72683	1.41684	1.93357	5.88655	1.3505	6.19554
ASB9	0.85599	0.604071	1.4489	1.02148	1.79909	1.33914	2.11437	1.23266	4.44493	3.14241	1.87578	6.60748	0.555816	1.48027	0.565597
GRIN3A	1.81147	0.411426	0.823749	0.83996	0.790772	1.49057	1.82782	1.58496	5.36317	2.26903	0.516015	0.748461	4.03474	4.337	0.678072
GPR12	1.45943	1.14405	0.250962	0.594549	0.0285692	0.432959	0.31034	2.08406	3.26604	3.41143	2.48543	0.0565835	1.02857	3.70819	5.08704
MKRN3	0.163499	0	0.163499	0.367371	0.526069	0.0285692	0.333424	0.411426	0.411426	0.650765	0.536053	2.83794	0.0426443	2.85997	0.495695
LOC100507194	0.176323	0.432959	0.214125	0	0.0426443	0.0703893	0.367371	0.137504	0.250962	4.0018	0.275007	0.0426443	0.189034	1.97085	0.214125
MIMT1	0.400538	0	0.163499	0	0.176323	0.0426443	0.163499	0.485427	0.31034	0.970854	0.545968	0.400538	1.54102	1.08406	1.0635
NLGN4Y	0	0.0143553	0.0143553	0	0.0143553	0.0143553	0	0	3.3978	0	0.250962	2.90689	0.970854	0	0.594549
CXorf57	4.86245	2.25096	3.66334	3.71699	2.39232	1.66448	3.86987	4.92837	5.79364	4.24793	5.57471	4.80632	7.63771	4.64386	5.32769
HMCN1	3.24031	0.956057	1.97085	2.23266	1.0635	0.782409	2.01792	3.75382	5.14445	3.96901	2.85798	3.52857	4.18666	4.18428	4.61589
CAMK2A	0.594549	0.613532	0.464668	0.454176	0.454176	0.0285692	0.286881	0.678072	0.879706	2.10434	1.45418	1.23266	1.03562	0.485427	1.02857
BARD1	2.26903	2.89142	1.45418	1.83188	2.36457	1.57046	3.67582	2.01078	3.84599	3.34767	5.07895	2.89724	3.30305	3.62761	4.57531
CCDC67	3.32048	3.774	3.49442	5.46369	4.2817	4.38198	3.81762	5.59395	6.75729	5.91361	6.94626	3.23573	6.24755	5.53138	6.51412
MAOB	5.34341	5.91552	2.65076	6.38146	5.43763	5.25058	5.33664	4.04002	7.393	7.26097	6.94111	6.20867	7.65421	6.12887	6.6008
ZIM2	0.871844	0.475085	0.443607	0.344828	1.26303	0.333424	1.07724	1.41143	1.42761	2.0072	1.08406	0.963474	2.41414	1.42761	2.13093
KATNAL1	3.43162	2.57289	2.76129	2.32769	3.05832	3.43962	3.0321	4.07724	4.02503	5.04221	4.765	3.76765	4.21023	3.74416	4.94345
ATP8A2	5.73525	6.11811	5.82985	4.81762	5.47508	6.32247	6.94404	7.0365	8.0187	8.35544	8.12784	6.47054	7.30497	5.85674	7.62395
PEG3	3.97085	2.68032	2.74416	2.48285	4.12019	2.41143	3.75809	4.04352	4.24565	5.02148	4.35473	3.65535	5.47962	4.36737	5.07682
AP1S2	3.90881	4.15623	4.22728	4.32769	4.40871	3.43162	4.9514	4.75702	5.53543	4.91073	5.07211	4.67751	5.61971	6.52042	5.98641
NPY6R	0.903038	0.238787	0.613532	0.367371	0.214125	0.275007	0.565597	0.641546	0.863938	0.731183	1.09761	0.678072	1.07039	1.45418	1.37851
SUMO4	0.925999	0.565597	0.545968	0.799087	0.443607	0.879706	0.594549	0.823749	1.58976	1.74846	0.918386	0.948601	1.41684	1.69599	1.22033
MAML2	2.45418	2.34483	3.01436	2.38128	3.43962	2.38681	3.94205	2.36457	4.14241	3.78136	3.29866	4.21257	4.97407	3.94111	3.14241
LOC653653	1.26903	0.933573	0.687061	1.03562	1.37851	0.831877	1.54597	1.40054	1.58015	1.46989	1.62293	1.40054	2.13422	2.98732	2.10769
KCNB2	2.854	2.21101	2.26903	2.53854	2.72028	3.21412	3.43029	3.31904	4.24336	4.13093	3.90593	3.25096	4.37016	2.86987	4.59813
ZBTB20	1.23266	0.847997	0.757023	1.04264	0.963474	1.0635	1.25096	1.53107	1.28688	2.33628	1.90689	1.72683	2.19535	1.73552	1.60881
KCNH7	2.44095	1.81147	2.75489	1.95606	2.01792	2.70044	2.99458	2.41143	2.12433	3.87971	4.10266	2.61824	3.56316	3.75596	3.77926
SPAG5	2.81762	4.48349	3.1811	4.60585	4.45352	2.65992	3.29719	3.04264	2.54844	2.48285	2.10434	2.65992	2.78031	3.46467	2.38128
NME4	6.97269	8.54408	7.95501	8.73118	7.66874	7.83112	7.21655	6.73213	6.67666	6.48639	6.24717	6.57395	6.76514	7.41092	6.27277
GPT2	4.65421	4.91361	5.80064	5.3512	6.18745	5.30159	5.74712	4.82069	4.15623	4.46923	4.85499	3.39506	3.76553	3.95606	4.73985
CDCA3	1.48543	3.58376	2.75702	3.7939	3.30743	1.83188	2.36457	2.53356	1.33342	1.96717	1.81558	1.40599	2.07724	2.26303	1.63691
AURKA	3.17313	3.84197	2.78031	4.79546	3.45286	2.43829	3.20006	2.08746	2.84398	2.02857	1.81967	2.31325	2.10769	2.65535	1.65076
WDR62	1.18903	3.16189	1.91456	2.54102	2.81762	1.50589	1.56071	1.7137	1.15704	0.879706	0.9855	0.85599	1.38405	1.85997	1.37295
MAP6D1	3.38405	3.03738	3.09424	3.32481	4.2426	3.90977	3.31034	2.90497	2.24489	2.30743	2.09761	2.48027	2.85997	1.8953	1.75275
FJX1	3.67129	3.08066	4.70487	3.42089	4.12598	3.87971	2.26303	2.63691	1.53107	2.69599	1.43829	2.54102	1.02857	3.03386	2.91265
ESPL1	2.46467	3.7137	3.74739	4.1177	3.04089	3.72247	3.1635	2.59455	2.39232	1.92979	2.10098	2.27501	2.65535	1.55582	2.34483
OIP5	0.765535	3.13258	1.73552	3.0993	2.38681	1.31615	1.77821	1.09085	0.895303	1.05658	1.11103	0.871844	0.765535	1.69153	1.02148
FOXM1	1.59932	4.50589	3.19849	4.82426	3.78136	2.54844	2.98185	2.77821	1.74416	1.91073	1.85997	2.33342	2.22342	2.94111	2.08066
GOLGA8E	0.669027	0.807355	1.13093	0.659925	1.04963	1.75702	0.400538	0.594549	0.286881	0.286881	0.263034	0.575312	0.454176	0.356144	0.443607
BUB1B	0.895303	3.53232	2.46467	3.97636	3.19377	1.79909	2.20477	1.87971	1.1375	1.02857	1.35614	1.37851	1.67807	2.08746	1.63227
CABP7	6.81275	8.09545	9.33217	8.43024	10.8794	8.04887	7.70922	7.10056	6.99152	7.69565	6.62863	6.7939	7.13155	5.20672	7.76281
ARHGAP11B	0.687061	2.18269	1.41684	2.85798	2.08066	0.9855	0.918386	0.847997	0.773996	0.650765	0.367371	0.918386	0.400538	1.1177	0.475085
NDC80	0.411426	3.71039	2.0635	3.24793	2.93357	1.79909	1.89918	1.82375	0.925999	0.748461	0.823749	1.0635	1.37295	1.774	1.55582
GRB14	1.8679	1.79494	0.847997	1.36177	0.475085	1.63227	2.23879	1.54102	1.10434	0.516015	1.08406	0.432959	0.137504	0.485427	0.367371
PLK1	2.06695	4.0365	3.67469	4.69377	4.01703	2.5509	2.83996	2.53107	1.852	1.81558	1.79909	2.06695	2.12763	2.94111	1.76129
TK1	2.21412	4.66448	4.03386	4.68986	4.18428	2.1375	2.75916	2.09761	2.03914	1.5509	1.46989	2.52607	2.24489	2.66448	2.07382
LOC100507050	3.11603	3.36457	2.87578	2.24489	4.08831	2.06005	3.74631	2.52857	1.39506	1.81558	1.848	1.28096	2.06695	2.55827	1.46467
TACC3	2.5509	5.03474	4.02326	5.57954	4.19061	3.02503	3.31759	3.26604	2.47249	2.91265	2.16672	2.86987	2.58015	2.8953	2.43296
CDCA2	0.189034	2.21412	0.790772	2.13093	2.03914	0.704872	0.565597	0.713696	0.454176	0.389567	0.286881	0.298658	0.454176	0.9855	0.333424
DMRTA2	0.163499	0.31034	0.847997	0.321928	0.83996	0.298658	0.189034	0.250962	0.176323	0.0426443	0.238787	0.0840643	0.0285692	0.163499	0.111031
NCAPH	0.536053	2.52105	1.42223	2.94486	2.07039	0.941106	1.15056	0.933573	0.687061	0.545968	0.378512	0.62293	0.765535	1.0635	0.970854
BATF2	2.38957	0.895303	3.26003	3.72465	3.69265	1.91456	2.09424	1.25701	0.604071	0.970854	1.09085	2.03562	0.879706	1.70929	0.879706
TNFRSF13C	1.42761	1.92979	2.52607	3.50843	1.54102	0.536053	0.903038	1	0.650765	0.389567	0.62293	0.799087	0.847997	1.0635	1.0072
KIF18A	0.526069	2.64386	1.73552	3.0635	2.43029	1.31034	1.02857	1.58015	0.526069	0.422233	0.632268	0.454176	0.978196	1.56071	0.963474
LOC100288637	0.485427	2.81967	1.15704	3.43696	2.20163	1.21412	0.925999	0.748461	0.659925	0.378512	0.516015	1.07724	0.713696	0.933573	0.831877
GSG2	0.536053	2.13422	1.25701	2.41684	1.66448	0.659925	0.956057	0.454176	0.275007	0.298658	0.163499	0.978196	0.321928	0.575312	0.505891
OPN3	3.48285	2.53107	3.53605	5.8802	3.34625	5.90761	2.58976	1.8679	2.41954	3.08916	2.33056	3.0268	1.48027	2.42492	1.76977
E2F2	0.214125	2.24184	1.38957	2.65076	1.83996	0.454176	0.790772	0.978196	0.604071	0.422233	0.344828	0.432959	0.613532	0.604071	0.731183
PTTG1	2.46728	6.11291	4.80168	6.21296	5.28799	4.29499	4.05224	4.20555	2.64847	1.82782	2.33628	2.93546	3.53232	4.48414	3.09255
BNIPL	3.31904	1.66448	1.57046	1.74416	0.722466	0.910733	1.45418	0.782409	0.641546	0.948601	0.739848	0.739848	0.545968	0.790772	0.344828
NETO2	2.852	6.20516	6.33521	5.54195	4.33485	5.48446	4.83238	4.51159	0.85599	2.49313	3.13914	2.86394	3.0268	2.41143	5.0751
MEGF11	0.575312	3.14241	0.823749	1.27501	2.98914	3.27798	1.18903	1.37851	0.879706	1.09085	1.16993	0.773996	1.03562	0.536053	0.659925
MKI67	0.847997	3.36177	2.37295	4.25852	2.70266	1.43296	2.16993	2.15056	0.970854	1.0072	1.07724	1.36737	1.20163	1.90689	1.42761
PRG4	2.15056	0.263034	1.1375	0.526069	2.87381	0.214125	0.831877	0.545968	0.226509	0.189034	0.687061	0.389567	0.250962	0.432959	0.505891
APOBEC3B	1.4489	3.16027	2.76129	3.88557	3.37016	2.02148	1.96347	2.16672	0.731183	1.52105	1.70044	0.925999	1.20163	1.37295	2.03562
LOC440910	0.15056	0.432959	0.815575	0.0976108	0.62293	0.201634	0.238787	0.378512	0.0976108	0.15056	0	0.0426443	0	1.93734	0
CEP55	0.632268	2.49825	1.67356	2.95233	1.98185	1	1.3505	1.0635	0.321928	0.475085	0.505891	1.03562	0.298658	1.24489	0.641546
TPX2	0.9855	4.68874	3.14405	4.96255	3.80219	2.60881	2.48285	2.52356	1.41143	1.38405	1.32769	1.73118	1.68706	2.98003	1.74846
CASC5	0.163499	1.95233	0.918386	2.11437	1.68257	0.823749	0.782409	0.739848	0.226509	0.356144	0.367371	0.485427	0.367371	0.807355	0.321928
KIF2C	0.823749	3.52482	3.03386	3.98094	3.42223	2.15704	1.83592	1.98185	1.02857	1.12433	1.43296	1.31034	1.4957	2.02503	1.20163
C4orf19	1.12433	1.18903	1.12433	2.33628	0.475085	0.333424	0.62293	1	0.0976108	0.111031	0.970854	0.275007	0.137504	0.356144	0.124328
RTKN2	2.50589	1.7866	1.58015	1.82782	1	0.85599	1.87184	1.20789	0.214125	0.659925	0.831877	0.722466	0.555816	1.20163	0.250962
BUB1	0.495695	4.1914	2.16993	4.23649	3.51096	2.22651	1.8953	1.72683	0.863938	0.910733	0.85599	1.1375	1.1177	2.4489	1.30451
KIF23	0.918386	3.00899	2.10769	3.9542	3.01257	1.57531	1.89142	1.83996	0.933573	0.831877	1.34483	1.29278	0.910733	1.4957	1.26303
HMMR	0.555816	3.35191	2.34483	3.35755	2.98003	1.31615	1.88362	1.99277	0.941106	1.30451	0.925999	0.863938	0.978196	1.58496	1.15056
ACOXL	2.34767	0.910733	2.79286	0.454176	1.66448	3.87774	1.02857	1.21412	0.575312	0.632268	0.903038	0.432959	0.83996	1.33342	0.992768
KIAA1045	0.367371	2.80323	0.505891	2.95233	3.12267	1.67356	0.226509	0.422233	0.356144	0.555816	0.238787	0.400538	0.238787	0.963474	1.02857
HCG26	2.81147	0.773996	4.32841	4.53667	6.13894	1.36737	2.4489	1.48027	0.823749	1.53107	1.47508	2.87578	0.432959	1.45418	1.05658
CLCNKB	3.13914	2.14405	1.85599	1.87184	1.04963	2.88947	3.07553	1.33342	1.32769	1.76129	1.31034	0.475085	0.333424	0.475085	0.847997
VSIG1	0.739848	1.38405	0.344828	0.757023	3.4489	0.344828	0.226509	0.0703893	0.0143553	0.0565835	0.124328	0.15056	0.0976108	0.31034	0
SCML4	0.613532	1.66448	2.43829	0.85599	1.79909	0.823749	0.757023	1.20163	0.214125	0.62293	0.454176	0.298658	0.422233	0.739848	0.713696
HCP5	3.51602	1.69599	5.98596	6.42811	7.45014	2.55827	3.25399	2.72683	1.83996	2.70044	3.23726	3.853	1.1635	3.13258	2.17313
TOP2A	1	4.99548	3.64501	5.51822	4.93452	2.89918	3.24945	3.07382	1.51602	1.50589	1.774	2.03914	2.3978	3.34341	2.15704
LOC154822	0.250962	0.226509	0.189034	0.189034	0.454176	0.411426	0.0565835	0.0143553	0.0565835	0.0565835	0.0703893	0.0143553	0.0143553	0.0976108	0.0143553
ANLN	0.659925	3.49313	2.28688	3.6893	2.94486	1.73985	1.91839	1.75702	0.895303	0.731183	0.823749	1.32769	1.09761	1.64616	1.16993
NUF2	0.903038	4.17871	2.57773	4.53356	3.41278	2.31904	1.87184	2.34483	1.29278	0.650765	0.933573	1.42223	1.59455	2.15704	1.66448
ISG15	5.86617	7.90268	6.54086	8.75399	8.47318	5.21179	4.99141	5.848	4.73118	4.78136	4.81609	5.82349	3.61706	6.03914	4.70487
ASTL	0.356144	0.659925	0.475085	0.137504	0.555816	0.847997	0.526069	0.238787	0	0.15056	0.124328	0	0.0565835	0.286881	0.15056
BAI2	1.63227	5.09339	2.17313	5.27165	3.34056	3.3505	2.38681	2.54597	1.87971	2.43563	2.06695	1.45418	1.95977	2.15704	1.53605
KIFC1	1.31034	4.37016	2.78241	4.23266	3.72901	2.26604	2.57773	2.45943	1.4489	1.59932	1.41684	1.4957	1.5509	2.37851	1.52105
CD6	1.70044	2.0321	3.33342	2.49825	1.99639	1.63691	1.43829	0.815575	0.575312	0.432959	1.15704	1.23266	0.356144	1.20163	0.432959
LHX2	0	0.432959	0.575312	0.83996	0.475085	0.367371	0.0285692	0.0565835	0.0426443	0	0	0.0565835	0.0285692	0.0565835	0.0703893
PBK	0.722466	4.78293	2.92029	4.34979	3.77294	2.51349	2.58496	2.68032	1.23266	1.52607	1.21412	1.15056	1.85599	2.60644	1.62761
C15orf42	0.214125	0.790772	0.485427	1.02148	1.64616	0.464668	0.378512	0.189034	0.0840643	0.189034	0.176323	0.31034	0.15056	0.201634	0.214125
OTOP3	3.92979	4.83643	4.06178	5.87652	3.6241	5.3579	4.26303	3.8125	2.71809	3.82069	1.96347	0.925999	0.594549	3.67129	2.32193
FZD2	2.39232	4.05311	4.8748	4.87922	5.92552	4.99865	3.33342	4.58376	1.5656	1.07039	3.49697	3.16189	0.613532	3.44758	1.58496
BIRC5	0.799087	4.02326	2.80529	4.30889	3.16511	1.9782	2.20789	2.1375	0.925999	1.02857	0.9855	1.4957	1.25701	2.26604	1.19535
LOC100652791	0	1.17632	0.201634	2.02857	1.05658	0.555816	0.189034	0.275007	0.0565835	0.176323	0.214125	0.0565835	0	0.0565835	0
HAPLN2	1.81967	2.58736	4.51979	2.91648	1.94111	0.613532	1.02148	5.7057	1.5509	0.823749	5.17991	1.66448	0.704872	1.48543	0.731183
CENPF	0.545968	4.14649	2.26604	4.93357	3.63807	2.42223	1.73118	1.99277	0.85599	0.970854	1.07724	1.09085	1.50589	2.34199	1.48543
AJAP1	0.495695	0.879706	0.378512	2.38681	1.99639	2.02857	0.526069	0.176323	0.176323	0.495695	0.124328	0.367371	0.0976108	0.555816	0.432959
LOC728716	0.475085	0.389567	2.54102	2.64155	1.08406	1.1177	0.526069	0	0.111031	0	0.176323	0.378512	0.15056	0	0.137504
SPNS2	3.90881	6.88484	5.50621	4.60288	4.56377	2.28392	5.19101	2.54102	2.42223	1.93357	2.49825	4.17632	1.53107	1.73118	2.24793
MYBL2	1.21412	2.69599	1.95233	3.80529	2.12433	1.13093	1.37295	1.18269	0.887525	0.495695	0.475085	0.871844	0.516015	1.50589	0.713696
CENPA	0.526069	3.6837	2.17632	3.64616	2.8953	1.53605	1.04264	1.64155	0.695994	0.713696	1.01436	0.807355	0.956057	1.53107	0.773996
CXCL10	2.26903	0.505891	5.71149	6.52356	4.35473	0.594549	1.1635	2.48027	0.632268	0.910733	1.05658	1.27501	0.111031	2.62059	0.163499
IQGAP3	0.678072	3.45418	2.04963	4.21723	2.78869	1.62293	1.79077	1.40599	0.594549	0.748461	0.545968	1.36737	1.0635	1.60881	0.807355
DLGAP5	0.422233	3.14893	1.30451	3.06867	2.68032	1.45943	1.10434	1.10434	0.214125	0.333424	0.505891	0.823749	0.669027	1.26303	0.695994
LOC400043	4.25399	1.20163	5.30415	4.854	4.75114	1.25096	4.91886	2.75489	1.848	1.20163	3.09255	2.53854	1.29866	1.30451	1.42761
PLEKHG4B	2.31904	4.6893	3.15543	3.9607	3.44361	4.32121	3.85997	0.790772	1.20163	0.773996	1.81558	1.83188	0.189034	2.71149	0.356144
CDCA8	1.40054	4.5292	5.32085	4.62	3.7137	2.85798	2.75702	2.57289	1.67807	2.10769	1.82375	1.66903	1.83996	2.72901	1.92979
NTNG1	0.575312	1.23266	0.757023	0.344828	2.34199	2.854	0.176323	0.0565835	0.0285692	0.0840643	0.275007	0.454176	0.0703893	0.163499	0
NEK2	0.411426	3.76871	1.83996	3.9982	3.13586	1.70044	1.66903	1.848	0.516015	1.18903	1	0.782409	1.17632	1.36177	1.1177
CXCL11	0.847997	0.176323	2.96347	3.22342	2.45154	0.201634	0.555816	0.594549	0.226509	0.422233	0.189034	0.226509	0.0840643	0.970854	0.111031
HOXB7	1.43829	3.8125	5.32625	4.22188	5.46597	6.73917	1.29866	0.773996	0.62293	1.4489	0.757023	2.80116	0.823749	3.05311	1.46467
EXO1	0.238787	2.13422	1.32769	3.64155	1.79077	2.45681	0.815575	0.613532	0.516015	0.286881	0.226509	0.475085	0.659925	0.941106	0.823749
ATP6V1B1	4.63865	3.6241	4.50208	4.21956	4.14975	5.18269	4.75756	0.948601	0.925999	2.24184	2.71809	1.62293	0.378512	3.43162	1.23266
DLX6	0.910733	1.63691	3.58976	2.3978	2.34483	3.80735	0.238787	0.411426	0.238787	1.38957	0.443607	0.516015	0.201634	1.02148	0.137504
KIF20A	0.887525	2.87381	2.05311	3.62059	2.87774	1.50589	2.01792	1.67356	0.495695	0.555816	0.555816	1.29866	0.992768	1.23266	1.0635
RRM2	0.847997	4.38888	2.96532	4.4822	3.32625	2.25096	2.9279	1.92979	1.08406	1.21412	0.956057	1.56071	1.32769	2.21412	1.33914
AURKB	0.910733	3.25248	2.78869	4.43962	3.05832	1.95233	1.76129	1.73985	0.790772	0.713696	1.0072	1.45418	1.32769	1.50589	0.505891
HLA-G	1.04963	0.367371	3.65191	1.62293	1.93357	0.214125	0.516015	0.485427	0.0703893	0.0426443	0.545968	0.333424	0.137504	0.536053	0.0426443
SAPCD2	1.09761	4.22342	2.85	3.99548	3.56071	2.56316	2.24793	2.80735	1.11103	1.14405	1.73552	1.18269	1.25701	2.25096	1.04264
UBE2C	1.63691	6.12681	4.5008	5.87995	5.02813	3.48671	3.54597	3.53107	2.01436	2.17313	2.02148	2.46467	2.32481	3.71149	1.76553
TROAP	1.12433	4.44427	3.22651	4.55336	3.07211	2.16027	2.01792	2.02503	0.895303	0.925999	0.687061	1.48543	1.5509	2.15056	1.30451
C6orf223	1.24489	2.65764	4.39438	4.69488	0.815575	0.226509	0.475085	0.286881	0.189034	1.04963	1.15056	0.238787	0.176323	0.400538	0.400538
FBN2	0.344828	3.04963	1.24489	1.82782	0.516015	0.124328	0.757023	0.321928	0.298658	0.201634	0.201634	0.333424	0.0426443	0.432959	0.275007
IFI6	7.75328	9.13802	8.61187	10.7751	12.1997	8.48498	6.78999	7.42063	6.47184	6.73335	6.80129	7.08905	8.16576	7.29637	6.58256
TAC3	0.0840643	0.505891	3.77821	1.90689	4.8679	2.27202	1.8953	0.0840643	0	0.31034	0	0.238787	0.356144	0	0.0840643
KIF18B	0.124328	2.94298	1.35614	3.35332	2.14078	1.03562	1.26303	1.02148	0.344828	0.475085	0.226509	0.584963	0.594549	0.978196	0.356144
CDC20	1.25701	4.88606	3.14731	5.33056	4.08831	3.0072	2.69377	2.63227	1.5656	1.22033	1.45943	1.78241	1.95233	2.35332	1.71809
KIF14	0.124328	2.32769	0.956057	3.88264	1.96717	1.02148	0.831877	0.815575	0.31034	0.389567	0.298658	0.356144	0.678072	0.678072	0.454176
KCNF1	2.29278	8.84969	3.35332	2.87971	2.45418	6.14384	0.226509	0.344828	1.15056	0.443607	0.475085	0.863938	0.748461	1.57046	0.411426
ASPM	0.286881	3.02326	1.28688	3.59096	2.38681	1.3505	0.933573	1.07039	0.389567	0.495695	0.443607	0.604071	0.526069	1.09761	0.485427
CDC25C	0.378512	2.58015	1.34483	2.33628	2.0072	0.704872	0.992768	1.01436	0.189034	0.298658	0.400538	0.454176	0.584963	0.695994	0.250962
GTSE1	0.555816	3.64731	2.3978	3.73335	2.78869	1.69599	1.63227	1.82375	0.613532	0.799087	0.782409	0.879706	0.910733	1.44361	0.85599
NEIL3	0.0703893	1.90304	1.10434	1.91456	1.46989	0.536053	0.400538	0.464668	0.0840643	0.189034	0.124328	0.31034	0.0285692	0.422233	0.15056
C5orf38	4.86691	5.59246	5.89263	5.0072	5.93452	6.92896	5.03738	4.28688	2.7866	3.78973	3.55582	3.80735	2.79077	4.11853	2.83188
CCNB2	0.933573	4.68874	3.42626	4.93026	4.30451	2.57531	2.39232	2.21723	1.09085	0.970854	1.23266	1.49057	1.27501	2.30451	1.59932
DEPDC1	0.137504	2.75061	0.695994	3.15218	2.08406	1.25096	0.895303	0.799087	0.250962	0.31034	0.298658	0.443607	0.344828	0.695994	0.464668
FAM64A	0.422233	4.71425	3.39506	4.65992	3.93452	2.51349	1.89142	2.19849	1.1635	0.823749	0.773996	1.39506	1.33914	1.93734	0.978196
HJURP	0.443607	3.5741	1.65076	3.90304	3.02503	1.65535	1.19535	1.1375	0.526069	0.641546	0.604071	0.669027	0.863938	1.05658	0.687061
PLD5	0.918386	4.30159	1.79494	3.75702	1.54597	6.01458	1.28096	0.275007	0.189034	0.594549	0.389567	0.956057	0.678072	1.5008	0.189034
P2RX5	1.71809	4.59395	1.4957	2.22959	0.536053	2.15056	0.389567	0.378512	0.0426443	0.333424	0.189034	0.584963	0.0285692	0.584963	0.201634
GPM6A	2.83794	0.731183	1.04264	2.09085	3.66562	1.848	0.9855	1.04963	0.137504	0.505891	1.10434	0.124328	0.432959	0.485427	0.176323
HOXB4	2.43563	3.94017	5.91313	6.78647	6.16651	6.8535	2.62994	1.95606	0.847997	2.50589	1.78241	3.22805	1.23879	2.48027	2.25399
LRRN4	1.47508	0.910733	2.37851	1.78241	2.78869	0.687061	0.695994	0.31034	0.163499	0.250962	0.137504	0.250962	0.411426	0.604071	0.176323
